# Supplementary material for: hTERT-Driven Immortalization of RDEB Fibroblast and Keratinocyte Cell Lines Followed by Cre-Mediated Transgene Elimination
Source: MDPI journal article supplement (doi:10.3390/ijms22083809), 2021-04-07
Supplement: s1 [file s1]

| node1   | node2   | node1 acc | node2 acc | node1 ann  | node2 ann    | score |
|---------|---------|-----------|-----------|------------|--------------|-------|
| WDR1    | TXNDC17 | ENSP0000  | ENSP0000  | WD repeat  | Thioredoxi   | 0,816 |
| WDR1    | FLNA    | ENSP0000  | ENSP0000  | WD repeat  | Filamin-A;   | 0,439 |
| TXNDC17 | WDR1    | ENSP0000  | ENSP0000  | Thioredoxi | WD repeat    | 0,816 |
| TIMP2   | THBS2   | ENSP0000  | ENSP0000  | Metalloprc | Thrombos     | 0,435 |
| TIMP2   | QPCT    | ENSP0000  | ENSP0000  | Metalloprc | Glutaminyl   | 0,904 |
| TIMP2   | PLAT    | ENSP0000  | ENSP0000  | Metalloprc | Tissue-type  | 0,488 |
| TIMP2   | NID1    | ENSP0000  | ENSP0000  | Metalloprc | Nidogen-1;   | 0,443 |
| TIMP2   | MMP1    | ENSP0000  | ENSP0000  | Metalloprc | Interstitial | 0,868 |
| TIMP2   | LCN2    | ENSP0000  | ENSP0000  | Metalloprc | Neutrophil   | 0,954 |
| TIMP2   | ITGA3   | ENSP0000  | ENSP0000  | Metalloprc | Integrin al  | 0,438 |
| TIMP2   | CXCL1   | ENSP0000  | ENSP0000  | Metalloprc | Growth-re    | 0,938 |
| TIMP2   | CTGF    | ENSP0000  | ENSP0000  | Metalloprc | Connective   | 0,588 |
| TIMP2   | COL6A1  | ENSP0000  | ENSP0000  | Metalloprc | Collagen al  | 0,404 |
| TIMP2   | COL18A1 | ENSP0000  | ENSP0000  | Metalloprc | Collagen al  | 0,504 |
| THBS2   | TIMP2   | ENSP0000  | ENSP0000  | Thrombos   | Metalloprc   | 0,435 |
| THBS2   | ITGA3   | ENSP0000  | ENSP0000  | Thrombos   | Integrin al  | 0,738 |
| THBS2   | FBLN1   | ENSP0000  | ENSP0000  | Thrombos   | Fibulin-1; I | 0,421 |
| THBS2   | CTGF    | ENSP0000  | ENSP0000  | Thrombos   | Connective   | 0,504 |
| THBS2   | COL6A1  | ENSP0000  | ENSP0000  | Thrombos   | Collagen al  | 0,571 |
| THBS2   | COL18A1 | ENSP0000  | ENSP0000  | Thrombos   | Collagen al  | 0,556 |

page 1 of 8

|          |          |          |          |                        |              |       |
|----------|----------|----------|----------|------------------------|--------------|-------|
| THBS2    | AEBP1    | ENSP0000 | ENSP0000 | Thrombos               | Adipocyte    | 0,585 |
| TFPI2    | PLAT     | ENSP0000 | ENSP0000 | Tissue fact            | Tissue-type  | 0,528 |
| TFPI2    | MMP1     | ENSP0000 | ENSP0000 | Tissue fact            | Interstitial | 0,509 |
| STC2     | NUCB1    | ENSP0000 | ENSP0000 | Stanniocal             | Nucleobinc   | 0,902 |
| SERPINB5 | PI3      | ENSP0000 | ENSP0000 | Serpin B5; Elafin; Neu |              | 0,61  |
| SERPINB5 | CLIC1    | ENSP0000 | ENSP0000 | Serpin B5; Chloride in |              | 0,451 |
| SERPINB2 | PLAT     | ENSP0000 | ENSP0000 | Plasminog              | Tissue-type  | 0,963 |
| SERPINB2 | MMP1     | ENSP0000 | ENSP0000 | Plasminog              | Interstitial | 0,531 |
| SERPINB2 | CXCL1    | ENSP0000 | ENSP0000 | Plasminog              | Growth-re    | 0,427 |
| SDF4     | NUCB1    | ENSP0000 | ENSP0000 | 45 kDa cal             | Nucleobinc   | 0,476 |
| RAET1G   | CD109    | ENSP0000 | ENSP0000 | UL-16 bind             | CD109 anti   | 0,901 |
| QPCT     | TIMP2    | ENSP0000 | ENSP0000 | Glutaminyl             | Metalloprc   | 0,904 |
| QPCT     | LCN2     | ENSP0000 | ENSP0000 | Glutaminyl             | Neutrophil   | 0,901 |
| QPCT     | CXCL1    | ENSP0000 | ENSP0000 | Glutaminyl             | Growth-re    | 0,906 |
| PLAT     | TIMP2    | ENSP0000 | ENSP0000 | Tissue-type            | Metalloprc   | 0,488 |
| PLAT     | TFPI2    | ENSP0000 | ENSP0000 | Tissue-type            | Tissue fact  | 0,528 |
| PLAT     | SERPINB2 | ENSP0000 | ENSP0000 | Tissue-type            | Plasminog    | 0,963 |
| PLAT     | MMP1     | ENSP0000 | ENSP0000 | Tissue-type            | Interstitial | 0,501 |
| PKM      | LDHB     | ENSP0000 | ENSP0000 | Pyruvate k             | Lactate del  | 0,958 |
| PKM      | CLIC1    | ENSP0000 | ENSP0000 | Pyruvate k             | Chloride in  | 0,565 |

page 2 of 8

|       |          |          |          |             |            |       |
|-------|----------|----------|----------|-------------|------------|-------|
| PI3   | SERPINB5 | ENSP0000 | ENSP0000 | Elafin; Neu | Serpin B5; | 0,61  |
| PI3   | LCN2     | ENSP0000 | ENSP0000 | Elafin; Neu | Neutrophil | 0,501 |
| PCDH7 | NID1     | ENSP0000 | ENSP0000 | Protocadh   | Nidogen-1; | 0,54  |
| NUCB1 | STC2     | ENSP0000 | ENSP0000 | Nucleobinc  | Stanniocal | 0,902 |
| NUCB1 | SDF4     | ENSP0000 | ENSP0000 | Nucleobinc  | 45 kDa cal | 0,476 |
| NRCAM | CNTN1    | ENSP0000 | ENSP0000 | Neuronal c  | Contactin- | 0,903 |
| NID1  | TIMP2    | ENSP0000 | ENSP0000 | Nidogen-1;  | Metalloprc | 0,443 |

|      |          |                                                                    |       |
|------|----------|--------------------------------------------------------------------|-------|
| NID1 | PCDH7    | ENSP0000( ENSP0000( Nidogen-1, Protocadherin-7                     | 0,54  |
| NID1 | MMP1     | ENSP0000( ENSP0000( Nidogen-1, Interstitial Metalloproteinase-1    | 0,935 |
| NID1 | LGALS3BP | ENSP0000( ENSP0000( Nidogen-1, Galectin-3-binding protein          | 0,506 |
| NID1 | LAMC2    | ENSP0000( ENSP0000( Nidogen-1, Laminin subunit gamma-2             | 0,591 |
| NID1 | LAMA1    | ENSP0000( ENSP0000( Nidogen-1, Laminin subunit alpha-1             | 0,972 |
| NID1 | ITGA3    | ENSP0000( ENSP0000( Nidogen-1, Integrin alpha-3                    | 0,931 |
| NID1 | FBLN1    | ENSP0000( ENSP0000( Nidogen-1, Fibulin-1; Laminin-binding protein  | 0,595 |
| NID1 | COL6A1   | ENSP0000( ENSP0000( Nidogen-1, Collagen alpha-1(I) chain           | 0,434 |
| NID1 | COL18A1  | ENSP0000( ENSP0000( Nidogen-1, Collagen alpha-1(VI) chain          | 0,577 |
| MMP1 | TIMP2    | ENSP0000( ENSP0000( Interstitial Metalloproteinase Inhibitor-2     | 0,868 |
| MMP1 | TFPI2    | ENSP0000( ENSP0000( Interstitial Tissue Factor Pathway Inhibitor-2 | 0,509 |
| MMP1 | SERPINB2 | ENSP0000( ENSP0000( Interstitial Plasminogen Activator Inhibitor-2 | 0,531 |
| MMP1 | PLAT     | ENSP0000( ENSP0000( Interstitial Tissue-type Plasminogen Activator | 0,501 |

page 3 of 8

|          |         |                                                                                |       |
|----------|---------|--------------------------------------------------------------------------------|-------|
| MMP1     | NID1    | ENSP0000( ENSP0000( Interstitial Nidogen-1, Interstitial Metalloproteinase-1   | 0,935 |
| MMP1     | CXCL1   | ENSP0000( ENSP0000( Interstitial Growth-regulatory factor                      | 0,587 |
| MMP1     | CTGF    | ENSP0000( ENSP0000( Interstitial Connective Tissue Growth Factor               | 0,584 |
| MMP1     | COL18A1 | ENSP0000( ENSP0000( Interstitial Collagen alpha-1(VI) chain                    | 0,404 |
| MANF     | HTRA1   | ENSP0000( ENSP0000( Mesencephalic Serine Proteinase-1                          | 0,453 |
| LGALS3BP | NID1    | ENSP0000( ENSP0000( Galectin-3- Nidogen-1, Galectin-3-binding protein          | 0,506 |
| LDHB     | PKM     | ENSP0000( ENSP0000( Lactate dehydrogenase B chain                              | 0,958 |
| LDHB     | CLIC1   | ENSP0000( ENSP0000( Lactate dehydrochloride ion channel                        | 0,432 |
| LCN2     | TIMP2   | ENSP0000( ENSP0000( Neutrophil Metalloproteinase Inhibitor-2                   | 0,954 |
| LCN2     | QPCT    | ENSP0000( ENSP0000( Neutrophil Glutaminyl Endopeptidase                        | 0,901 |
| LCN2     | PI3     | ENSP0000( ENSP0000( Neutrophil Elafin; Neutrophil Secretory Granule Protein-3  | 0,501 |
| LCN2     | CXCL1   | ENSP0000( ENSP0000( Neutrophil Growth-regulatory factor                        | 0,959 |
| LCN2     | CSF3    | ENSP0000( ENSP0000( Neutrophil Granulocyte Colony-stimulating Factor-3         | 0,441 |
| LAMC2    | NID1    | ENSP0000( ENSP0000( Laminin subunit gamma-2 Nidogen-1, Laminin subunit gamma-2 | 0,591 |
| LAMC2    | LAMA1   | ENSP0000( ENSP0000( Laminin subunit alpha-1 Laminin subunit alpha-1            | 0,915 |
| LAMC2    | ITGA3   | ENSP0000( ENSP0000( Laminin subunit Integrin alpha-3                           | 0,955 |
| LAMC2    | FBLN1   | ENSP0000( ENSP0000( Laminin subunit Fibulin-1; Laminin-binding protein         | 0,456 |
| LAMA1    | NID1    | ENSP0000( ENSP0000( Laminin subunit Nidogen-1, Laminin subunit alpha-1         | 0,972 |
| LAMA1    | LAMC2   | ENSP0000( ENSP0000( Laminin subunit Laminin subunit gamma-2                    | 0,915 |
| LAMA1    | L1CAM   | ENSP0000( ENSP0000( Laminin subunit Neural cell L1CAM                          | 0,902 |

page 4 of 8

|       |         |                                                                          |       |
|-------|---------|--------------------------------------------------------------------------|-------|
| LAMA1 | ITGA3   | ENSP0000( ENSP0000( Laminin subunit Integrin alpha-3                     | 0,956 |
| LAMA1 | COL6A1  | ENSP0000( ENSP0000( Laminin subunit Collagen alpha-1(I) chain            | 0,47  |
| LAMA1 | COL18A1 | ENSP0000( ENSP0000( Laminin subunit Collagen alpha-1(VI) chain           | 0,918 |
| L1CAM | LAMA1   | ENSP0000( ENSP0000( Neural cell Laminin subunit L1CAM                    | 0,902 |
| L1CAM | CNTN1   | ENSP0000( ENSP0000( Neural cell Contactin-1                              | 0,961 |
| ITGA3 | TIMP2   | ENSP0000( ENSP0000( Integrin alpha-3 Metalloproteinase Inhibitor-2       | 0,438 |
| ITGA3 | THBS2   | ENSP0000( ENSP0000( Integrin alpha-3 Thrombospondin-2                    | 0,738 |
| ITGA3 | NID1    | ENSP0000( ENSP0000( Integrin alpha-3 Nidogen-1, Integrin alpha-3         | 0,931 |
| ITGA3 | LAMC2   | ENSP0000( ENSP0000( Integrin alpha-3 Laminin subunit gamma-2             | 0,955 |
| ITGA3 | LAMA1   | ENSP0000( ENSP0000( Integrin alpha-3 Laminin subunit alpha-1             | 0,956 |
| ITGA3 | FLNA    | ENSP0000( ENSP0000( Integrin alpha-3 Filamin-A; Integrin-binding protein | 0,71  |
| ITGA3 | CSPG4   | ENSP0000( ENSP0000( Integrin alpha-3 Chondroitin-6-sulfate               | 0,918 |
| ITGA3 | COL6A1  | ENSP0000( ENSP0000( Integrin alpha-3 Collagen alpha-1(I) chain           | 0,726 |
| ITGA3 | COL18A1 | ENSP0000( ENSP0000( Integrin alpha-3 Collagen alpha-1(VI) chain          | 0,92  |
| IL1R2 | CXCL1   | ENSP0000( ENSP0000( Interleukin Growth-regulatory factor                 | 0,489 |

|       |       |                                             |       |
|-------|-------|---------------------------------------------|-------|
| HTRA1 | MANF  | ENSP0000( ENSP0000( Serine prot Mesencepl   | 0,453 |
| FLNA  | WDR1  | ENSP0000( ENSP0000( Filamin-A; WD repeat    | 0,439 |
| FLNA  | ITGA3 | ENSP0000( ENSP0000( Filamin-A; Integrin al  | 0,71  |
| FBLN1 | THBS2 | ENSP0000( ENSP0000( Fibulin-1; I Thrombos   | 0,421 |
| FBLN1 | NID1  | ENSP0000( ENSP0000( Fibulin-1; I Nidogen-1; | 0,595 |

page 5 of 8

|        |          |                                              |       |
|--------|----------|----------------------------------------------|-------|
| FBLN1  | LAMC2    | ENSP0000( ENSP0000( Fibulin-1; I Laminin su  | 0,456 |
| FBLN1  | EFEMP1   | ENSP0000( ENSP0000( Fibulin-1; I EGF-contai  | 0,935 |
| FBLN1  | CTGF     | ENSP0000( ENSP0000( Fibulin-1; I Connective  | 0,592 |
| FBLN1  | COL6A1   | ENSP0000( ENSP0000( Fibulin-1; I Collagen al | 0,552 |
| FBLN1  | COL18A1  | ENSP0000( ENSP0000( Fibulin-1; I Collagen al | 0,489 |
| EFEMP1 | FBLN1    | ENSP0000( ENSP0000( EGF-contai Fibulin-1; I  | 0,935 |
| EFEMP1 | CTGF     | ENSP0000( ENSP0000( EGF-contai Connective    | 0,533 |
| EFEMP1 | AEBP1    | ENSP0000( ENSP0000( EGF-contai Adipocyte     | 0,514 |
| CXCL1  | TIMP2    | ENSP0000( ENSP0000( Growth-re; Metalloprc    | 0,938 |
| CXCL1  | SERPINB2 | ENSP0000( ENSP0000( Growth-re; Plasminog     | 0,427 |
| CXCL1  | QPCT     | ENSP0000( ENSP0000( Growth-re; Glutaminy     | 0,906 |
| CXCL1  | MMP1     | ENSP0000( ENSP0000( Growth-re; Interstitial  | 0,587 |
| CXCL1  | LCN2     | ENSP0000( ENSP0000( Growth-re; Neutrophil    | 0,959 |
| CXCL1  | IL1R2    | ENSP0000( ENSP0000( Growth-re; Interleukin   | 0,489 |
| CXCL1  | CTGF     | ENSP0000( ENSP0000( Growth-re; Connective    | 0,44  |
| CXCL1  | CSF3     | ENSP0000( ENSP0000( Growth-re; Granulocyt    | 0,802 |
| CTSV   | COL18A1  | ENSP0000( ENSP0000( Cathepsin Collagen al    | 0,918 |
| CTGF   | TIMP2    | ENSP0000( ENSP0000( Connective Metalloprc    | 0,588 |
| CTGF   | THBS2    | ENSP0000( ENSP0000( Connective Thrombos      | 0,504 |
| CTGF   | MMP1     | ENSP0000( ENSP0000( Connective Interstitial  | 0,584 |

page 6 of 8

|         |         |                                              |       |
|---------|---------|----------------------------------------------|-------|
| CTGF    | FBLN1   | ENSP0000( ENSP0000( Connective Fibulin-1; I  | 0,592 |
| CTGF    | EFEMP1  | ENSP0000( ENSP0000( Connective EGF-contai    | 0,533 |
| CTGF    | CXCL1   | ENSP0000( ENSP0000( Connective Growth-re;    | 0,44  |
| CTGF    | COL6A1  | ENSP0000( ENSP0000( Connective Collagen al   | 0,413 |
| CTGF    | COL18A1 | ENSP0000( ENSP0000( Connective Collagen al   | 0,414 |
| CSPG4   | ITGA3   | ENSP0000( ENSP0000( Chondroiti Integrin al   | 0,918 |
| CSPG4   | COL6A1  | ENSP0000( ENSP0000( Chondroiti Collagen al   | 0,472 |
| CSF3    | LCN2    | ENSP0000( ENSP0000( Granulocyt Neutrophil    | 0,441 |
| CSF3    | CXCL1   | ENSP0000( ENSP0000( Granulocyt Growth-re;    | 0,802 |
| CSF3    | CLIC1   | ENSP0000( ENSP0000( Granulocyt Chloride in   | 0,416 |
| COL6A1  | TIMP2   | ENSP0000( ENSP0000( Collagen al Metalloprc   | 0,404 |
| COL6A1  | THBS2   | ENSP0000( ENSP0000( Collagen al Thrombos     | 0,571 |
| COL6A1  | NID1    | ENSP0000( ENSP0000( Collagen al Nidogen-1;   | 0,434 |
| COL6A1  | LAMA1   | ENSP0000( ENSP0000( Collagen al Laminin su   | 0,47  |
| COL6A1  | ITGA3   | ENSP0000( ENSP0000( Collagen al Integrin al  | 0,726 |
| COL6A1  | FBLN1   | ENSP0000( ENSP0000( Collagen al Fibulin-1; I | 0,552 |
| COL6A1  | CTGF    | ENSP0000( ENSP0000( Collagen al Connective   | 0,413 |
| COL6A1  | CSPG4   | ENSP0000( ENSP0000( Collagen al Chondroiti   | 0,472 |
| COL6A1  | COL18A1 | ENSP0000( ENSP0000( Collagen al Collagen al  | 0,933 |
| COL18A1 | TIMP2   | ENSP0000( ENSP0000( Collagen al Metalloprc   | 0,504 |

page 7 of 8

|         |       |                                            |       |
|---------|-------|--------------------------------------------|-------|
| COL18A1 | THBS2 | ENSP0000( ENSP0000( Collagen al Thrombos   | 0,556 |
| COL18A1 | NID1  | ENSP0000( ENSP0000( Collagen al Nidogen-1; | 0,577 |

|         |          |                                              |       |
|---------|----------|----------------------------------------------|-------|
| COL18A1 | MMP1     | ENSP0000( ENSP0000( Collagen al Interstitial | 0,404 |
| COL18A1 | LAMA1    | ENSP0000( ENSP0000( Collagen al Laminin su   | 0,918 |
| COL18A1 | ITGA3    | ENSP0000( ENSP0000( Collagen al Integrin al  | 0,92  |
| COL18A1 | FBLN1    | ENSP0000( ENSP0000( Collagen al Fibulin-1; I | 0,489 |
| COL18A1 | CTSV     | ENSP0000( ENSP0000( Collagen al Cathepsin    | 0,918 |
| COL18A1 | CTGF     | ENSP0000( ENSP0000( Collagen al Connective   | 0,414 |
| COL18A1 | COL6A1   | ENSP0000( ENSP0000( Collagen al Collagen al  | 0,933 |
| CNTN1   | NRCAM    | ENSP0000( ENSP0000( Contactin-; Neuronal c   | 0,903 |
| CNTN1   | L1CAM    | ENSP0000( ENSP0000( Contactin-; Neural cell  | 0,961 |
| CLIC1   | SERPINB5 | ENSP0000( ENSP0000( Chloride in Serpin B5;   | 0,451 |
| CLIC1   | PKM      | ENSP0000( ENSP0000( Chloride in Pyruvate k   | 0,565 |
| CLIC1   | LDHB     | ENSP0000( ENSP0000( Chloride in Lactate del  | 0,432 |
| CLIC1   | CSF3     | ENSP0000( ENSP0000( Chloride in Granulocyt   | 0,416 |
| CD109   | RAET1G   | ENSP0000( ENSP0000( CD109 anti UL-16 bind    | 0,901 |
| AEBP1   | THBS2    | ENSP0000( ENSP0000( Adipocyte Thrombos       | 0,585 |
| AEBP1   | EFEMP1   | ENSP0000( ENSP0000( Adipocyte EGF-contai     | 0,514 |

| node1    | node2    | node1 acc | node2 acc | node1 ann    | node2 ann    | score |
|----------|----------|-----------|-----------|--------------|--------------|-------|
| COL18A1  | COL6A1   | ENSP0000  | ENSP0000  | Collagen al  | Collagen al  | 0,933 |
| COL18A1  | CTGF     | ENSP0000  | ENSP0000  | Collagen al  | Connective   | 0,414 |
| COL18A1  | CTSV     | ENSP0000  | ENSP0000  | Collagen al  | Cathepsin    | 0,918 |
| COL18A1  | LAMA1    | ENSP0000  | ENSP0000  | Collagen al  | Laminin su   | 0,918 |
| COL18A1  | MMP1     | ENSP0000  | ENSP0000  | Collagen al  | Interstitial | 0,404 |
| COL18A1  | TIMP2    | ENSP0000  | ENSP0000  | Collagen al  | Metalloprc   | 0,504 |
| COL6A1   | COL18A1  | ENSP0000  | ENSP0000  | Collagen al  | Collagen al  | 0,933 |
| COL6A1   | CSPG4    | ENSP0000  | ENSP0000  | Collagen al  | Chondroiti   | 0,472 |
| COL6A1   | CTGF     | ENSP0000  | ENSP0000  | Collagen al  | Connective   | 0,413 |
| COL6A1   | LAMA1    | ENSP0000  | ENSP0000  | Collagen al  | Laminin su   | 0,47  |
| COL6A1   | TIMP2    | ENSP0000  | ENSP0000  | Collagen al  | Metalloprc   | 0,404 |
| CSPG4    | COL6A1   | ENSP0000  | ENSP0000  | Chondroiti   | Collagen al  | 0,472 |
| CTGF     | COL18A1  | ENSP0000  | ENSP0000  | Connective   | Collagen al  | 0,414 |
| CTGF     | COL6A1   | ENSP0000  | ENSP0000  | Connective   | Collagen al  | 0,413 |
| CTGF     | MMP1     | ENSP0000  | ENSP0000  | Connective   | Interstitial | 0,584 |
| CTGF     | TIMP2    | ENSP0000  | ENSP0000  | Connective   | Metalloprc   | 0,588 |
| CTSV     | COL18A1  | ENSP0000  | ENSP0000  | Cathepsin    | Collagen al  | 0,918 |
| L1CAM    | LAMA1    | ENSP0000  | ENSP0000  | Neural cell  | Laminin su   | 0,902 |
| LAMA1    | COL18A1  | ENSP0000  | ENSP0000  | Laminin su   | Collagen al  | 0,918 |
| LAMA1    | COL6A1   | ENSP0000  | ENSP0000  | Laminin su   | Collagen al  | 0,47  |
| LAMA1    | L1CAM    | ENSP0000  | ENSP0000  | Laminin su   | Neural cell  | 0,902 |
| LAMA1    | LAMC2    | ENSP0000  | ENSP0000  | Laminin su   | Laminin su   | 0,915 |
| LAMC2    | LAMA1    | ENSP0000  | ENSP0000  | Laminin su   | Laminin su   | 0,915 |
| MMP1     | COL18A1  | ENSP0000  | ENSP0000  | Interstitial | Collagen al  | 0,404 |
| MMP1     | CTGF     | ENSP0000  | ENSP0000  | Interstitial | Connective   | 0,584 |
| MMP1     | SERPINB2 | ENSP0000  | ENSP0000  | Interstitial | Plasminog    | 0,531 |
| MMP1     | TFPI2    | ENSP0000  | ENSP0000  | Interstitial | Tissue fact  | 0,509 |
| MMP1     | TIMP2    | ENSP0000  | ENSP0000  | Interstitial | Metalloprc   | 0,868 |
| SERPINB2 | MMP1     | ENSP0000  | ENSP0000  | Plasminog    | Interstitial | 0,531 |
| TFPI2    | MMP1     | ENSP0000  | ENSP0000  | Tissue fact  | Interstitial | 0,509 |
| TIMP2    | COL18A1  | ENSP0000  | ENSP0000  | Metalloprc   | Collagen al  | 0,504 |
| TIMP2    | COL6A1   | ENSP0000  | ENSP0000  | Metalloprc   | Collagen al  | 0,404 |
| TIMP2    | CTGF     | ENSP0000  | ENSP0000  | Metalloprc   | Connective   | 0,588 |
| TIMP2    | MMP1     | ENSP0000  | ENSP0000  | Metalloprc   | Interstitial | 0,868 |
