# Supplementary material for: hTERT-Driven Immortalization of RDEB Fibroblast and Keratinocyte Cell Lines Followed by Cre-Mediated Transgene Elimination
Source: MDPI journal article supplement (doi:10.3390/ijms22083809), 2021-04-07
Supplement: s1 [file s1]

| LFQ intens |
|------------|------------|------------|------------|------------|------------|------------|------------|------------|
| 1          | 1          | 1          | 2          | 2          | 2          | 2          | 3          | 3          |
| 29,78377   | 31,4543    | 31,45292   | 30,42302   | 31,36656   | 30,96987   | 31,01065   | 30,13394   | 29,97937   |
| 31,83876   | 32,27556   | 33,19985   | 30,84416   | 30,55536   | 31,14108   | 31,12127   | 28,38928   | 27,05992   |
| 31,03118   | 32,02697   | 32,30549   | 28,31095   | 28,08035   | 29,06669   | 28,91336   | 20,79574   | 24,09746   |
| 24,49698   | 28,37501   | 30,17415   | 21,70664   | 24,67246   | 22,18999   | 22,98011   | 22,38854   | 22,66983   |
| 25,30247   | 23,26814   | 30,43599   | 25,17741   | 22,8621    | 24,30911   | 24,60071   | 22,0442    | 20,70717   |
| 33,83921   | 33,80713   | 34,3397    | 31,56883   | 31,73376   | 32,68712   | 32,62625   | 29,26591   | 27,52992   |
| 24,74222   | 24,60337   | 30,64418   | 25,10153   | 25,00449   | 21,73413   | 23,56802   | 21,70214   | 22,83614   |
| 28,93188   | 30,30051   | 31,04999   | 27,05144   | 26,39643   | 28,41143   | 27,3339    | 23,9612    | 24,71225   |
| 22,99402   | 22,92194   | 23,06814   | 24,61234   | 24,17456   | 23,74875   | 29,0791    | 27,32199   | 28,00646   |
| 21,99236   | 23,77998   | 23,67256   | 20,3393    | 20,89156   | 21,14923   | 20,90991   | 20,98905   | 21,36959   |
| 30,68529   | 30,28703   | 30,85964   | 30,81879   | 30,90928   | 30,77941   | 30,85823   | 30,37399   | 30,38577   |
| 22,19592   | 22,21376   | 21,9892    | 22,62654   | 23,66371   | 22,6054    | 22,51538   | 23,07883   | 23,2337    |
| 33,43204   | 33,12132   | 33,52426   | 34,14444   | 34,1734    | 33,66034   | 33,77686   | 34,1496    | 34,19638   |
| 24,80228   | 24,53925   | 22,37404   | 22,42995   | 25,92134   | 25,04222   | 24,20963   | 24,18624   | 20,9857    |
| 33,44233   | 33,07312   | 33,15658   | 32,61617   | 32,74256   | 33,55408   | 33,48424   | 32,51371   | 32,86356   |
| 23,0782    | 24,21573   | 24,30058   | 23,73355   | 23,35205   | 23,34027   | 24,0616    | 23,02624   | 23,14763   |
| 22,09261   | 23,93129   | 25,10321   | 24,61857   | 23,12668   | 22,78339   | 22,55286   | 22,82993   | 22,60608   |
| 33,00556   | 32,62901   | 32,61581   | 32,94073   | 32,86133   | 32,7856    | 33,02602   | 33,07253   | 33,08569   |
| 25,96016   | 26,23316   | 28,2069    | 28,04411   | 27,45591   | 27,88495   | 27,38714   | 26,86667   | 26,94492   |
| 28,59754   | 29,47365   | 29,71357   | 28,63596   | 28,62502   | 29,0331    | 28,81403   | 28,41393   | 28,11629   |
| 24,54144   | 24,05358   | 24,24405   | 26,21647   | 26,88285   | 23,95601   | 23,44199   | 25,95476   | 26,61077   |
| 31,73759   | 30,27275   | 29,1043    | 30,81215   | 30,58262   | 30,93818   | 30,58414   | 32,10942   | 31,34757   |
| 26,97235   | 27,53875   | 23,70641   | 22,08734   | 23,46811   | 22,2817    | 22,63029   | 27,70695   | 27,51427   |
| 22,93884   | 22,8041    | 29,19943   | 28,65775   | 22,67563   | 28,79383   | 29,29743   | 22,48849   | 23,56157   |
| 27,09295   | 26,39926   | 26,58606   | 28,29824   | 28,05274   | 26,49989   | 26,80193   | 28,56384   | 28,69026   |
| 28,13104   | 28,25503   | 28,74641   | 28,37977   | 28,43305   | 28,94693   | 28,85878   | 27,75085   | 27,60159   |
| 28,65492   | 30,31646   | 29,05628   | 27,62944   | 27,36328   | 25,98713   | 27,53282   | 24,71282   | 25,02129   |
| 24,86585   | 25,66858   | 26,89342   | 24,55467   | 24,4985    | 24,65529   | 21,50152   | 24,3995    | 26,34206   |
| 28,38961   | 29,04604   | 27,39198   | 27,05734   | 28,2615    | 27,86071   | 27,11128   | 28,68201   | 29,20016   |
| 29,42252   | 28,33654   | 28,53126   | 29,20744   | 28,26616   | 28,82299   | 28,99418   | 29,84019   | 30,15798   |
| 32,96418   | 32,67141   | 32,896     | 33,34889   | 33,30157   | 32,60907   | 33,00887   | 33,36307   | 33,28444   |
| 28,45391   | 23,5664    | 23,91694   | 23,14386   | 27,57788   | 21,32798   | 23,06441   | 27,5285    | 28,11277   |
| 26,35839   | 28,33151   | 26,54073   | 25,614     | 26,20596   | 27,04458   | 26,9249    | 21,48138   | 26,02842   |
| 29,36146   | 28,99612   | 29,57028   | 29,23779   | 28,91288   | 28,17327   | 28,51661   | 29,26282   | 28,85243   |
| 30,43559   | 30,01983   | 30,76928   | 30,10749   | 29,93579   | 30,29734   | 30,09572   | 29,60846   | 29,72095   |
| 22,9875    | 22,37928   | 25,87683   | 23,99438   | 24,1868    | 26,35328   | 25,0115    | 21,9154    | 24,04902   |
| 25,27824   | 25,41796   | 23,60397   | 25,33149   | 25,43039   | 26,54541   | 26,21545   | 25,56404   | 25,33248   |
| 22,87401   | 22,50927   | 23,7104    | 24,00533   | 25,3654    | 23,46208   | 26,69856   | 27,58857   | 27,57975   |
| 24,83543   | 25,70187   | 25,88129   | 28,09989   | 27,96157   | 27,57521   | 27,98994   | 28,46045   | 28,40068   |
| 31,3198    | 32,1689    | 30,87943   | 30,74903   | 30,78659   | 30,80301   | 30,76256   | 31,63901   | 31,60342   |
| 30,49037   | 30,49486   | 30,10011   | 30,22458   | 30,02314   | 29,36208   | 29,68611   | 29,85046   | 29,70337   |
| 29,46919   | 29,0311    | 30,18648   | 29,65763   | 29,75707   | 28,64516   | 28,96063   | 28,84972   | 29,1438    |
| 32,04986   | 32,27134   | 32,02815   | 32,79498   | 32,75521   | 31,31802   | 31,96716   | 31,79052   | 32,39749   |
| 22,55595   | 24,25068   | 24,56715   | 23,0456    | 23,46548   | 22,989     | 23,09163   | 22,47135   | 22,52411   |
| 25,95821   | 26,75468   | 26,51845   | 26,03626   | 26,50314   | 25,78497   | 25,75491   | 23,51093   | 25,66473   |
| 27,68646   | 22,77694   | 24,11508   | 27,24998   | 26,84374   | 26,66519   | 26,03526   | 27,90133   | 26,9982    |
| 29,76029   | 28,75646   | 28,52832   | 29,17926   | 28,34744   | 27,79631   | 27,73098   | 27,82171   | 27,83864   |
| 30,69594   | 30,59067   | 30,49295   | 30,91663   | 30,91748   | 30,831     | 30,68361   | 31,33527   | 31,499     |

|          |          |          |          |          |          |          |          |          |
|----------|----------|----------|----------|----------|----------|----------|----------|----------|
| 23,29637 | 25,09152 | 25,01103 | 23,23882 | 23,89069 | 25,0916  | 25,45848 | 23,61908 | 24,25263 |
| 22,49253 | 22,52481 | 25,14794 | 23,05078 | 22,8054  | 21,69381 | 22,78836 | 22,47301 | 22,89599 |
| 39,82963 | 40,3972  | 40,3675  | 39,97216 | 40,09383 | 39,7945  | 39,99011 | 39,55767 | 39,61191 |
| 28,40186 | 29,72688 | 29,72761 | 28,52862 | 29,12443 | 28,77982 | 28,26808 | 27,7348  | 28,20983 |
| 34,12325 | 32,30138 | 33,52869 | 33,55225 | 33,47255 | 32,45425 | 32,37485 | 31,58352 | 31,52687 |
| 30,13883 | 29,47183 | 28,8308  | 29,95934 | 29,9157  | 29,73702 | 29,175   | 29,41877 | 29,20156 |
| 22,62466 | 25,91079 | 25,23092 | 22,80388 | 24,75694 | 24,96521 | 25,17489 | 22,48554 | 23,17973 |
| 25,66971 | 25,48395 | 23,57503 | 26,97126 | 26,78694 | 26,20247 | 26,27021 | 26,45172 | 26,68565 |
| 26,47663 | 27,08861 | 28,3572  | 27,35481 | 27,29658 | 25,45707 | 25,58337 | 26,46857 | 26,36766 |
| 27,38303 | 28,39734 | 32,13302 | 27,33253 | 26,12108 | 25,9608  | 27,51307 | 23,24587 | 21,69751 |
| 25,05519 | 28,31765 | 30,25214 | 28,23571 | 26,87373 | 28,07923 | 27,23425 | 27,06764 | 29,22977 |
| 28,35342 | 27,33415 | 26,39274 | 27,92875 | 27,98555 | 26,77706 | 26,85115 | 27,75793 | 28,13335 |
| 34,81926 | 34,74259 | 34,96942 | 35,25993 | 35,31477 | 34,69872 | 34,8409  | 35,07112 | 34,91665 |
| 26,38739 | 29,42734 | 29,03265 | 28,95795 | 27,89891 | 30,17985 | 28,8887  | 28,28105 | 27,13134 |
| 25,75524 | 24,58153 | 26,69803 | 29,68005 | 28,98682 | 23,46787 | 24,53582 | 27,83545 | 27,79228 |
| 31,47581 | 29,98983 | 30,45582 | 31,25259 | 31,19366 | 29,44123 | 28,88757 | 32,26411 | 32,34884 |
| 23,90181 | 23,45889 | 22,8481  | 23,49253 | 23,7263  | 23,40093 | 23,49521 | 23,95961 | 24,07227 |
| 23,96913 | 23,94351 | 25,28884 | 24,42714 | 23,9736  | 24,42822 | 25,31517 | 24,33688 | 24,59429 |
| 26,46247 | 26,39802 | 26,11337 | 27,12495 | 26,4502  | 26,37867 | 25,8764  | 26,75824 | 27,07745 |
| 27,74175 | 26,71686 | 26,68284 | 27,62485 | 28,0773  | 27,45834 | 28,0267  | 27,94447 | 27,14248 |
| 26,32468 | 28,36611 | 28,62708 | 26,59861 | 26,49697 | 27,7252  | 27,80107 | 26,69432 | 26,16611 |
| 32,49028 | 32,54522 | 32,02716 | 32,55034 | 32,41956 | 33,49118 | 32,99525 | 31,95491 | 31,90081 |
| 30,75422 | 30,03604 | 31,20005 | 30,95088 | 30,94831 | 30,04218 | 29,87449 | 29,93227 | 29,90297 |
| 24,87891 | 25,97367 | 25,76981 | 25,20105 | 24,93405 | 25,19959 | 24,85771 | 23,93373 | 24,59821 |
| 29,45912 | 29,6348  | 29,13973 | 29,22299 | 29,29959 | 29,25986 | 29,29769 | 28,45709 | 28,59715 |
| 23,09327 | 22,72077 | 24,42926 | 29,01081 | 29,04226 | 29,36077 | 29,08563 | 28,76284 | 29,60442 |
| 29,35548 | 22,51285 | 27,11108 | 30,4184  | 29,97528 | 22,12187 | 27,80931 | 31,11166 | 30,12854 |
| 30,29351 | 30,37098 | 30,32034 | 29,59586 | 29,41542 | 29,22338 | 29,18959 | 28,92872 | 28,58043 |
| 30,80209 | 30,56074 | 30,1162  | 30,4565  | 30,12842 | 30,64134 | 30,5539  | 30,16949 | 30,31008 |
| 28,33769 | 28,78279 | 28,03837 | 26,8832  | 27,00131 | 27,44979 | 27,41224 | 27,20602 | 27,0276  |
| 30,47373 | 29,53393 | 29,67622 | 30,88358 | 30,62104 | 30,64581 | 30,31149 | 29,83079 | 30,10974 |
| 31,64736 | 31,49781 | 31,01824 | 31,2683  | 31,09339 | 30,62052 | 31,00618 | 31,18943 | 30,85712 |
| 26,02485 | 22,60765 | 26,55919 | 26,79699 | 23,39697 | 26,79476 | 25,26446 | 22,918   | 27,45403 |
| 30,69917 | 30,19084 | 29,30687 | 30,18459 | 30,73287 | 31,3022  | 31,05705 | 30,66619 | 30,62043 |
| 29,70017 | 31,17516 | 30,40669 | 29,74439 | 29,73148 | 30,72525 | 31,16249 | 29,19221 | 29,52684 |
| 32,1478  | 31,99044 | 31,91071 | 32,20597 | 32,28532 | 32,09276 | 32,07431 | 32,46709 | 32,60202 |
| 36,66924 | 36,67477 | 37,06567 | 36,23622 | 36,39741 | 36,92138 | 36,83975 | 36,54697 | 36,51467 |
| 28,83641 | 27,71673 | 28,26006 | 29,13582 | 28,71823 | 28,22366 | 28,1248  | 27,88332 | 27,59399 |
| 31,38469 | 31,11873 | 31,19578 | 31,53723 | 31,60116 | 31,29576 | 31,11471 | 32,09704 | 32,07728 |
| 29,73119 | 27,79749 | 28,15938 | 27,87701 | 28,09628 | 28,40255 | 28,18778 | 28,98829 | 29,14239 |
| 26,75468 | 27,26141 | 28,06712 | 27,51209 | 27,91102 | 27,01723 | 27,34706 | 27,24164 | 26,99949 |
| 24,06817 | 22,51959 | 22,60184 | 26,4321  | 24,59241 | 23,57057 | 24,31043 | 23,02665 | 24,03884 |
| 28,95074 | 29,18386 | 29,2963  | 28,62383 | 28,84107 | 29,17331 | 29,1775  | 28,1155  | 28,13951 |
| 23,45989 | 24,27916 | 24,54799 | 24,41886 | 21,94694 | 24,67745 | 24,417   | 24,42873 | 24,85529 |
| 25,5526  | 23,09792 | 24,06357 | 27,97301 | 27,77335 | 26,13055 | 25,72093 | 27,91296 | 27,27293 |
| 29,78544 | 27,05631 | 26,84074 | 30,28824 | 29,64406 | 28,51537 | 28,73463 | 30,31959 | 30,06958 |
| 31,08772 | 30,64736 | 31,39719 | 31,11787 | 31,49815 | 31,23026 | 31,08715 | 31,30883 | 31,2161  |
| 22,48696 | 23,48598 | 22,96295 | 25,59269 | 25,5305  | 25,10185 | 25,35279 | 24,66536 | 25,05383 |
| 26,77568 | 23,67122 | 27,37426 | 26,84182 | 26,88344 | 26,01937 | 25,8469  | 26,18799 | 26,702   |
| 23,47735 | 23,90008 | 23,88922 | 23,2737  | 23,33624 | 23,76486 | 23,2089  | 23,51364 | 24,24561 |

|          |          |          |          |          |          |          |          |          |
|----------|----------|----------|----------|----------|----------|----------|----------|----------|
| 22,53613 | 23,74615 | 23,54647 | 25,32358 | 24,49582 | 24,10509 | 23,78548 | 23,13526 | 24,43243 |
| 28,64038 | 28,47406 | 29,14611 | 29,47485 | 28,93306 | 28,28498 | 28,2889  | 27,83286 | 28,09053 |
| 29,46527 | 28,86555 | 29,29649 | 28,86938 | 29,17762 | 28,87132 | 28,94419 | 29,59793 | 29,31106 |
| 27,06938 | 28,89143 | 28,26526 | 27,44261 | 27,41973 | 27,19639 | 27,51796 | 26,59974 | 26,78207 |
| 31,45405 | 31,32876 | 30,25327 | 31,0185  | 31,25175 | 30,93227 | 31,12368 | 31,43251 | 31,40009 |
| 32,5143  | 31,86172 | 32,04274 | 32,38851 | 32,54153 | 32,39657 | 32,43649 | 32,79676 | 32,60309 |
| 30,11496 | 29,17999 | 28,50233 | 30,25777 | 29,8096  | 29,40576 | 29,48535 | 30,18707 | 29,51655 |
| 27,49579 | 26,13406 | 25,21182 | 26,31403 | 26,73376 | 27,57087 | 27,8052  | 28,65363 | 28,81427 |
| 31,02373 | 31,7677  | 31,75561 | 31,30721 | 31,30948 | 31,69499 | 31,41825 | 30,72972 | 31,02281 |
| 27,14092 | 26,77228 | 27,16959 | 27,53349 | 27,53705 | 27,61034 | 27,64972 | 27,46521 | 27,64113 |
| 28,46443 | 27,67445 | 27,16615 | 27,87496 | 22,43601 | 28,38059 | 27,90029 | 29,15318 | 29,11966 |
| 26,15194 | 26,13663 | 26,40391 | 26,1744  | 25,58695 | 25,60925 | 25,44594 | 24,83359 | 24,6608  |
| 28,86977 | 28,23768 | 28,17874 | 27,6006  | 27,57167 | 27,58914 | 27,88367 | 28,00774 | 27,87121 |
| 27,03601 | 26,83581 | 26,9506  | 22,51562 | 27,15808 | 26,49095 | 26,48205 | 27,01041 | 26,90633 |
| 24,22059 | 25,35528 | 25,29018 | 24,60156 | 24,26556 | 24,5428  | 24,76157 | 24,10556 | 22,01563 |
| 28,37248 | 27,89389 | 29,32772 | 28,45128 | 27,78457 | 27,89192 | 27,72858 | 28,12623 | 27,99205 |
| 26,14332 | 23,01189 | 24,33834 | 27,70088 | 23,52517 | 23,64966 | 22,34579 | 27,47839 | 28,50415 |
| 27,54399 | 25,67411 | 26,14766 | 27,58628 | 27,5059  | 27,32174 | 27,3808  | 28,95366 | 29,51783 |
| 22,40098 | 23,81693 | 23,63272 | 26,63145 | 26,90392 | 27,20909 | 22,62445 | 26,7656  | 26,85222 |
| 28,62429 | 26,96345 | 27,71476 | 28,46848 | 28,2867  | 27,39526 | 27,73841 | 28,50469 | 28,57838 |
| 28,73053 | 24,52453 | 28,43924 | 28,86414 | 28,93092 | 28,77878 | 22,56012 | 23,16895 | 28,88824 |
| 22,22519 | 24,05714 | 23,08479 | 20,84115 | 20,80986 | 20,17731 | 20,20192 | 21,1201  | 21,69238 |
| 21,90548 | 23,68897 | 23,85056 | 25,06817 | 23,37174 | 25,15623 | 24,58164 | 22,24401 | 21,58573 |
| 27,4773  | 26,69458 | 28,40807 | 28,08233 | 27,94078 | 26,12778 | 26,64045 | 27,4259  | 27,39395 |
| 25,24107 | 23,69519 | 23,87995 | 25,01504 | 24,50355 | 23,90812 | 24,18526 | 26,31443 | 26,06079 |
| 30,49486 | 31,13663 | 32,0949  | 30,66195 | 29,75248 | 32,0186  | 31,615   | 30,53557 | 30,70471 |
| 27,68759 | 27,50385 | 28,24354 | 28,02189 | 26,97913 | 26,97978 | 27,68746 | 26,87467 | 26,90323 |
| 27,59634 | 27,47057 | 27,37923 | 28,11753 | 27,47908 | 28,82642 | 28,21933 | 28,18834 | 28,32693 |
| 22,38697 | 23,94143 | 25,0925  | 25,21749 | 22,11606 | 22,6314  | 25,75771 | 24,90724 | 22,14161 |
| 23,78216 | 26,74496 | 26,26912 | 26,66655 | 26,46883 | 26,35175 | 26,35805 | 26,64733 | 26,30196 |
| 33,49441 | 32,92128 | 32,59539 | 32,3817  | 32,26994 | 32,90683 | 32,90919 | 33,27711 | 33,37036 |
| 23,67721 | 22,78137 | 23,41876 | 26,10536 | 26,18569 | 25,36903 | 25,84886 | 23,16877 | 21,86169 |
| 25,58569 | 23,1495  | 22,57251 | 24,56248 | 27,52709 | 26,79613 | 26,39562 | 25,28355 | 24,47191 |
| 27,75513 | 28,21183 | 27,7604  | 26,90529 | 26,82905 | 27,53646 | 26,94905 | 26,56261 | 26,16398 |
| 29,76917 | 28,95427 | 28,57236 | 29,82902 | 30,14722 | 29,61994 | 30,10762 | 31,08759 | 31,39622 |
| 27,97104 | 24,13355 | 23,53183 | 25,66793 | 26,47122 | 22,09738 | 26,35919 | 29,65397 | 28,37335 |
| 24,58526 | 25,44518 | 25,80934 | 25,38788 | 25,90371 | 25,1848  | 25,36262 | 25,01636 | 25,70197 |
| 26,35753 | 25,14492 | 26,15178 | 27,13575 | 27,41579 | 25,93001 | 25,80102 | 26,41308 | 26,95005 |
| 29,00715 | 28,8387  | 29,76729 | 29,54305 | 29,31948 | 28,25399 | 29,28131 | 28,55421 | 28,74156 |
| 29,21792 | 32,58394 | 30,50654 | 28,12623 | 30,26919 | 29,19049 | 29,2372  | 26,63409 | 22,71205 |
| 29,22757 | 23,924   | 26,58721 | 27,54399 | 21,78727 | 27,06548 | 26,48171 | 29,63819 | 30,59495 |
| 29,96939 | 29,87926 | 28,24984 | 28,92269 | 29,53094 | 29,31214 | 29,26177 | 30,53853 | 30,19531 |
| 27,03149 | 27,33142 | 27,70081 | 27,11038 | 27,41716 | 26,63048 | 27,27622 | 26,92785 | 27,31829 |
| 30,34467 | 30,25372 | 30,40761 | 30,49343 | 30,13198 | 29,22607 | 29,44213 | 29,93312 | 29,39983 |
| 26,32978 | 25,5773  | 25,67737 | 27,30042 | 27,01595 | 27,28569 | 26,81115 | 26,51752 | 27,29413 |
| 23,30494 | 25,02753 | 24,20769 | 21,66731 | 21,06474 | 24,80292 | 24,66129 | 23,87211 | 23,80055 |
| 22,7308  | 23,63123 | 24,27583 | 26,40868 | 26,53424 | 27,85412 | 27,98462 | 27,96505 | 27,55311 |
| 23,01668 | 23,20372 | 24,27764 | 26,49803 | 26,36123 | 21,74912 | 26,1163  | 23,94667 | 22,99179 |
| 23,00669 | 23,45689 | 22,91417 | 22,25534 | 24,40763 | 23,71639 | 23,2798  | 23,6228  | 24,35692 |
| 23,84414 | 24,56426 | 24,14361 | 26,90047 | 27,01797 | 23,04612 | 26,99194 | 23,29207 | 21,7728  |

|          |          |          |          |          |          |          |          |          |
|----------|----------|----------|----------|----------|----------|----------|----------|----------|
| 27,69737 | 26,80772 | 26,85555 | 28,44892 | 27,86455 | 28,01143 | 27,57427 | 28,09119 | 28,61376 |
| 32,21095 | 32,23803 | 32,37464 | 32,07061 | 31,97004 | 32,08949 | 31,83217 | 31,84176 | 31,17146 |
| 26,73104 | 25,19689 | 24,38988 | 22,31128 | 25,25555 | 24,68581 | 23,04007 | 23,24094 | 22,1104  |
| 23,23996 | 24,51734 | 23,0489  | 24,38555 | 22,96906 | 23,09225 | 23,3615  | 21,63014 | 21,64979 |
| 33,1712  | 32,76987 | 31,82775 | 32,78755 | 32,74049 | 32,65612 | 32,74585 | 33,03581 | 32,32381 |
| 33,56207 | 33,87646 | 33,62843 | 33,68301 | 34,18844 | 34,17913 | 34,08417 | 33,73721 | 32,55218 |
| 23,21048 | 24,95903 | 25,34147 | 24,46065 | 26,02003 | 22,13707 | 22,23981 | 25,55888 | 25,82129 |
| 28,62048 | 28,59463 | 28,16322 | 28,52099 | 28,36035 | 28,34617 | 28,57015 | 27,47212 | 27,3232  |
| 27,19563 | 26,77944 | 26,91718 | 26,77291 | 27,0135  | 27,20844 | 26,25686 | 26,69485 | 26,17672 |
| 29,05012 | 28,27177 | 27,92156 | 28,84554 | 27,93123 | 28,2327  | 28,08618 | 28,54197 | 28,47119 |
| 28,27728 | 24,215   | 24,57643 | 27,95427 | 26,79699 | 22,89161 | 26,77744 | 28,58499 | 28,03601 |
| 30,5313  | 28,74301 | 29,35727 | 30,95387 | 30,81261 | 29,55379 | 28,98414 | 30,88664 | 30,98956 |
| 22,72538 | 22,34425 | 21,81765 | 23,43149 | 21,9234  | 21,65298 | 21,76786 | 22,38853 | 21,80982 |
| 25,93488 | 26,56552 | 26,27538 | 27,25953 | 26,7604  | 27,72702 | 27,55186 | 27,5742  | 27,85792 |
| 30,49895 | 30,54563 | 31,03636 | 31,73884 | 31,96558 | 31,36124 | 31,4488  | 31,45983 | 31,59072 |
| 29,78499 | 29,14092 | 28,8289  | 29,47299 | 29,28615 | 29,43408 | 29,58163 | 29,46194 | 29,64397 |
| 23,25643 | 23,04572 | 22,66345 | 23,46148 | 22,90094 | 23,43582 | 23,54321 | 24,35057 | 24,77258 |
| 29,98251 | 29,46474 | 29,52045 | 29,93818 | 30,00638 | 29,49331 | 29,8263  | 30,06111 | 29,98861 |
| 30,53399 | 31,64255 | 31,45988 | 32,47361 | 31,34022 | 21,94433 | 30,41901 | 30,48693 | 23,17258 |
| 29,03701 | 27,4182  | 27,61744 | 30,29428 | 30,01478 | 29,87616 | 30,71498 | 26,92717 | 27,37103 |
| 29,41945 | 28,1755  | 27,99572 | 28,05388 | 27,88745 | 28,8979  | 28,90722 | 28,08811 | 28,4265  |
| 29,86488 | 29,6667  | 29,86606 | 30,12139 | 29,96637 | 29,59092 | 29,0759  | 29,22869 | 29,25798 |
| 26,29667 | 25,03846 | 24,52492 | 25,97248 | 25,33504 | 25,60096 | 26,30412 | 24,09491 | 24,71654 |
| 27,38492 | 28,44091 | 27,86685 | 27,42926 | 27,12416 | 28,70606 | 28,12297 | 27,77769 | 27,13065 |
| 29,24704 | 28,01919 | 28,46486 | 27,12475 | 27,50127 | 27,40162 | 27,56761 | 28,76853 | 29,01962 |
| 26,1668  | 27,14763 | 26,99043 | 26,60442 | 26,65335 | 27,12839 | 27,13193 | 25,5854  | 25,88229 |
| 22,12114 | 23,35111 | 23,77726 | 22,72528 | 23,21424 | 22,32888 | 23,98546 | 24,90405 | 23,08309 |
| 21,43329 | 21,26316 | 23,21829 | 21,77338 | 21,94389 | 23,43033 | 22,17335 | 21,88558 | 23,09263 |
| 23,27266 | 23,05515 | 24,49419 | 28,20527 | 23,44089 | 22,41971 | 23,52586 | 28,58692 | 28,11098 |
| 25,57245 | 23,58268 | 25,70585 | 23,47914 | 23,83335 | 25,23169 | 24,42541 | 23,34204 | 24,55397 |
| 27,6803  | 22,83008 | 27,2553  | 26,95638 | 27,37625 | 28,4215  | 27,46886 | 28,86166 | 27,3435  |
| 26,15642 | 26,49176 | 26,30198 | 26,3562  | 26,16638 | 26,56796 | 26,51907 | 26,16265 | 26,14602 |
| 27,24336 | 28,7107  | 23,02098 | 27,99916 | 28,12204 | 28,44762 | 28,63786 | 28,07086 | 28,57532 |
| 22,48635 | 23,09693 | 24,33101 | 23,50749 | 23,4279  | 23,46438 | 23,98442 | 22,792   | 22,30644 |
| 26,7406  | 27,39648 | 27,47885 | 26,64636 | 26,88367 | 27,06569 | 27,16873 | 27,61147 | 27,93061 |
| 27,87473 | 26,84828 | 26,64403 | 24,01014 | 22,0047  | 23,69696 | 22,98111 | 23,15847 | 24,53848 |
| 31,02538 | 28,0608  | 26,95283 | 29,20121 | 28,55677 | 20,3209  | 23,47313 | 29,68667 | 28,82845 |
| 27,63319 | 25,07255 | 25,58253 | 28,68067 | 28,78544 | 27,80101 | 27,63409 | 28,96416 | 29,14397 |
| 23,18387 | 21,93488 | 23,89936 | 22,62006 | 22,4368  | 23,5451  | 22,93451 | 22,33549 | 22,08537 |
| 26,06747 | 26,14028 | 26,19261 | 25,5405  | 24,27242 | 24,804   | 22,52962 | 23,97202 | 24,54699 |
| 20,66865 | 22,29856 | 22,86931 | 21,98116 | 22,22385 | 21,91947 | 22,37928 | 22,00295 | 21,68611 |
| 22,87826 | 27,17693 | 26,35365 | 27,31077 | 22,16631 | 26,01827 | 23,9734  | 28,36415 | 26,89446 |
| 22,46193 | 24,14566 | 23,93981 | 22,21463 | 22,41504 | 22,0996  | 22,17139 | 22,28238 | 22,73144 |
| 29,34995 | 30,30791 | 29,86489 | 29,35098 | 29,56202 | 29,8237  | 30,01265 | 29,09605 | 29,22467 |
| 25,43825 | 25,71874 | 26,0371  | 25,00924 | 25,57306 | 25,1314  | 25,22902 | 23,40778 | 24,62851 |
| 33,84633 | 33,18176 | 32,9191  | 34,94026 | 34,86277 | 34,7928  | 34,7456  | 34,83479 | 34,94576 |
| 30,32571 | 30,38061 | 29,69471 | 28,77445 | 28,88037 | 28,9153  | 29,22858 | 29,26152 | 29,23364 |
| 26,60484 | 26,35755 | 27,0202  | 27,37708 | 27,16029 | 27,31363 | 27,36853 | 25,76352 | 26,29381 |
| 28,24173 | 28,04682 | 28,11981 | 28,26481 | 28,57275 | 28,65615 | 28,37683 | 27,85293 | 27,32852 |
| 28,94824 | 27,49694 | 26,82177 | 27,39534 | 26,58663 | 28,36507 | 28,20186 | 27,2893  | 27,09305 |

|          |          |          |          |          |          |          |          |          |
|----------|----------|----------|----------|----------|----------|----------|----------|----------|
| 31,21714 | 31,15509 | 31,74727 | 29,25818 | 28,87643 | 29,77217 | 30,3184  | 29,67677 | 28,89209 |
| 23,78097 | 24,24307 | 25,10033 | 24,19753 | 23,75817 | 24,66096 | 24,51147 | 24,51244 | 24,22118 |
| 25,80181 | 27,30374 | 27,68117 | 28,20662 | 28,06332 | 27,5666  | 27,60625 | 26,79959 | 27,09073 |
| 30,52673 | 30,50503 | 30,39479 | 30,92741 | 30,84236 | 31,31484 | 31,244   | 31,09213 | 31,13589 |
| 30,80186 | 30,69835 | 30,70347 | 31,23186 | 31,23181 | 30,83996 | 30,74166 | 31,29082 | 31,40202 |
| 20,94663 | 25,10793 | 29,54775 | 29,44782 | 23,03416 | 29,40538 | 29,19777 | 29,74551 | 28,54878 |
| 28,80999 | 28,71509 | 28,60918 | 28,03239 | 28,31825 | 28,30138 | 28,43583 | 29,45138 | 29,59557 |
| 32,08724 | 31,52272 | 31,39018 | 31,12805 | 31,05349 | 30,89829 | 31,05226 | 32,28653 | 32,35935 |
| 21,37512 | 22,7043  | 21,79578 | 23,34055 | 23,29488 | 23,16682 | 23,1216  | 21,44602 | 21,38864 |
| 21,08503 | 22,76161 | 23,87801 | 23,80747 | 22,82011 | 21,57761 | 22,86011 | 27,84356 | 27,88681 |
| 26,98512 | 23,88829 | 25,92445 | 25,79927 | 25,93492 | 27,40965 | 27,26428 | 27,23726 | 27,24245 |
| 28,7162  | 28,86865 | 28,6635  | 28,6732  | 28,22605 | 28,45517 | 28,25948 | 28,63775 | 28,65458 |
| 29,0598  | 29,72306 | 29,90124 | 28,15528 | 28,18253 | 29,42274 | 29,04757 | 27,12495 | 27,30496 |
| 22,41892 | 21,9556  | 26,00719 | 26,80587 | 27,00089 | 26,6245  | 26,67681 | 26,63506 | 26,22015 |
| 29,99105 | 30,73731 | 30,59566 | 28,90779 | 28,90976 | 30,09043 | 30,21048 | 29,82221 | 29,62558 |
| 26,36351 | 24,09426 | 23,43975 | 21,1175  | 25,6198  | 24,95832 | 25,10386 | 25,21593 | 25,46588 |
| 31,72082 | 30,41649 | 30,87298 | 32,31355 | 32,22556 | 30,76975 | 31,00691 | 32,54494 | 32,64534 |
| 32,07333 | 31,20705 | 31,79579 | 32,15551 | 32,04954 | 31,58289 | 31,57808 | 31,72428 | 31,43226 |
| 30,47383 | 30,22205 | 30,35374 | 30,26953 | 29,9057  | 30,05892 | 30,18966 | 29,8763  | 29,84151 |
| 27,64952 | 27,24627 | 27,75015 | 26,81982 | 27,20051 | 27,89735 | 27,65895 | 26,94213 | 27,03276 |
| 28,17693 | 22,669   | 27,6284  | 28,16111 | 28,41679 | 28,05352 | 27,52716 | 28,37902 | 28,13536 |
| 32,43964 | 31,66072 | 31,17665 | 34,3535  | 34,38985 | 33,92344 | 33,84763 | 34,53907 | 34,4746  |
| 27,63437 | 24,60421 | 23,3362  | 27,51187 | 27,37152 | 22,66718 | 24,74349 | 27,94436 | 27,13663 |
| 28,76202 | 29,10482 | 27,51923 | 29,5136  | 29,89116 | 30,42722 | 29,85855 | 29,03499 | 29,16816 |
| 31,91812 | 31,49729 | 31,76746 | 31,74021 | 32,05985 | 32,19759 | 32,46127 | 32,38785 | 32,43547 |
| 28,07572 | 28,64599 | 30,51625 | 25,26263 | 24,3812  | 26,74098 | 27,54458 | 24,61745 | 25,62589 |
| 27,91536 | 26,85626 | 27,82019 | 27,62401 | 27,78625 | 27,58771 | 27,64746 | 26,86207 | 27,31173 |
| 27,46544 | 27,27044 | 28,29281 | 28,24812 | 28,54374 | 27,47576 | 27,75251 | 27,67721 | 27,64856 |
| 23,619   | 22,80758 | 24,78621 | 24,2452  | 21,4702  | 22,93478 | 22,62632 | 27,23781 | 26,85875 |
| 27,90621 | 23,60109 | 25,8839  | 28,06358 | 28,09984 | 22,3937  | 22,48816 | 28,32225 | 27,60406 |
| 31,3891  | 32,20644 | 31,21784 | 31,12712 | 31,16075 | 32,05462 | 31,98217 | 31,1827  | 31,06676 |
| 35,727   | 35,08001 | 34,21993 | 35,31125 | 35,36708 | 34,7692  | 34,89767 | 35,99507 | 36,21522 |
| 27,78075 | 25,62995 | 26,9862  | 28,32822 | 27,9165  | 26,24567 | 26,04947 | 28,63682 | 27,9645  |
| 26,8405  | 27,13956 | 27,20359 | 26,94044 | 27,01073 | 26,72546 | 26,91319 | 27,10179 | 26,94949 |
| 33,14163 | 33,0862  | 33,01676 | 32,73808 | 32,75444 | 32,81086 | 32,49651 | 32,88815 | 32,58511 |
| 28,97509 | 28,84161 | 27,99226 | 28,70902 | 29,11279 | 29,50673 | 29,20676 | 29,74953 | 29,41581 |
| 26,53551 | 26,10412 | 25,55915 | 26,66384 | 25,96404 | 26,32924 | 26,47822 | 26,15151 | 25,37518 |
| 24,86117 | 24,58233 | 24,77077 | 24,16615 | 21,33634 | 22,8082  | 23,02755 | 24,55356 | 23,5323  |
| 27,41345 | 27,08192 | 26,77027 | 26,86479 | 27,41401 | 25,27459 | 25,02644 | 26,20646 | 25,87446 |
| 27,04302 | 26,42065 | 26,76307 | 27,92224 | 27,7395  | 26,83509 | 26,89018 | 27,84667 | 27,64746 |
| 32,24073 | 32,4552  | 32,24505 | 30,98346 | 31,16423 | 32,62991 | 32,65057 | 31,34409 | 31,77999 |
| 32,34393 | 32,45435 | 32,4553  | 32,94348 | 32,95486 | 32,43572 | 32,60366 | 32,71596 | 32,97266 |
| 30,05672 | 29,71406 | 30,27453 | 30,81138 | 30,90792 | 29,45875 | 29,50932 | 30,14819 | 30,21037 |
| 25,77042 | 26,13144 | 26,3175  | 26,07843 | 26,08483 | 26,78818 | 26,09887 | 24,87235 | 25,29915 |
| 28,89357 | 28,32582 | 28,6976  | 29,45996 | 29,7921  | 29,70604 | 29,07184 | 30,20455 | 30,12842 |
| 32,37023 | 33,27378 | 33,19432 | 32,67712 | 32,71778 | 33,38317 | 33,51136 | 32,40586 | 32,37746 |
| 27,82457 | 22,22908 | 26,8411  | 28,13467 | 27,67101 | 27,37815 | 26,85958 | 27,07449 | 26,65567 |
| 22,98498 | 23,10019 | 24,09997 | 22,65718 | 23,60543 | 21,79398 | 23,99501 | 22,06209 | 23,02199 |
| 22,69794 | 22,9823  | 25,89069 | 26,70807 | 25,99596 | 21,42328 | 25,08148 | 26,87091 | 26,11504 |
| 22,44216 | 22,29515 | 21,8745  | 26,8918  | 27,93343 | 22,3351  | 23,1682  | 27,71803 | 27,88821 |

|                                                                                        |          |          |          |          |          |          |          |          |
|----------------------------------------------------------------------------------------|----------|----------|----------|----------|----------|----------|----------|----------|
| 28,86847                                                                               | 25,22255 | 23,93872 | 28,67949 | 28,82271 | 28,34875 | 28,94827 | 29,42582 | 30,35174 |
| 27,409                                                                                 | 29,02929 | 28,78812 | 26,86962 | 27,06589 | 28,87678 | 28,89235 | 26,98    | 26,92343 |
| 21,14364                                                                               | 22,45959 | 21,6066  | 23,11883 | 23,52409 | 21,33205 | 22,62649 | 23,46276 | 23,12591 |
| 28,06902                                                                               | 26,75175 | 22,9078  | 28,69942 | 28,62457 | 26,73854 | 27,21234 | 28,70547 | 28,86124 |
| 28,45591                                                                               | 27,97115 | 25,94675 | 30,13931 | 30,33543 | 29,29721 | 29,07702 | 30,74671 | 30,57362 |
| 28,08396                                                                               | 28,29772 | 27,10669 | 27,45772 | 27,76989 | 21,23318 | 27,06969 | 28,09018 | 28,31385 |
| 32,25367                                                                               | 31,42842 | 31,05543 | 32,6382  | 32,8189  | 30,53751 | 30,67152 | 33,03574 | 32,60869 |
| 21,83059                                                                               | 22,35942 | 23,95503 | 22,99011 | 22,52471 | 22,67241 | 22,55497 | 23,16306 | 23,2048  |
| 24,49363                                                                               | 25,39369 | 25,63425 | 25,80092 | 25,88462 | 26,39831 | 26,72988 | 23,14286 | 25,68035 |
| 28,25142                                                                               | 28,18698 | 28,13892 | 27,08172 | 26,78731 | 28,6101  | 28,57236 | 27,50385 | 27,46599 |
| 29,18348                                                                               | 29,40099 | 28,37952 | 29,30898 | 29,31954 | 29,29999 | 29,52232 | 30,40304 | 30,03486 |
| 22,35912                                                                               | 23,95871 | 21,64258 | 23,57819 | 22,99253 | 21,29182 | 21,36832 | 24,78731 | 24,35057 |
| 28,59399                                                                               | 28,64935 | 28,3438  | 28,34164 | 28,56107 | 28,7376  | 28,03249 | 28,91088 | 28,1472  |
| 23,26826                                                                               | 27,42005 | 26,16066 | 26,02789 | 26,17493 | 27,22894 | 27,662   | 25,26964 | 22,28789 |
| 27,09154                                                                               | 27,17693 | 23,85863 | 22,72165 | 27,13438 | 26,72078 | 26,47979 | 21,88856 | 25,99466 |
| 26,93348                                                                               | 25,91684 | 25,40669 | 24,97456 | 26,01767 | 26,10015 | 26,38017 | 26,146   | 25,63702 |
| 29,70532                                                                               | 30,88729 | 30,16854 | 28,60038 | 28,53267 | 30,07915 | 30,23421 | 28,67074 | 28,63737 |
| 29,74069                                                                               | 27,99857 | 28,44221 | 29,78396 | 29,52427 | 29,45252 | 29,43796 | 30,38915 | 30,22768 |
| 23,89384                                                                               | 24,98298 | 24,33845 | 23,1695  | 22,83973 | 24,19528 | 24,15267 | 22,20413 | 22,43987 |
| 27,79371                                                                               | 27,19094 | 27,70372 | 28,74622 | 29,1228  | 28,4729  | 28,49102 | 29,57782 | 29,8098  |
| 28,50881                                                                               | 27,51089 | 27,90828 | 28,44557 | 28,73841 | 28,99021 | 28,80557 | 28,76819 | 28,57578 |
| 27,09778                                                                               | 28,37061 | 27,34087 | 27,58606 | 28,19315 | 29,02324 | 28,3803  | 27,94921 | 28,35094 |
| 26,33748                                                                               | 23,30331 | 25,61288 | 27,87596 | 27,00689 | 25,76532 | 25,80087 | 26,28348 | 26,59548 |
| 23,76749                                                                               | 27,1333  | 26,10571 | 22,37297 | 24,27405 | 25,9091  | 26,6363  | 24,42316 | 24,67955 |
| 28,4394                                                                                | 29,1112  | 29,40734 | 28,72994 | 28,32444 | 28,37886 | 27,92914 | 26,89504 | 27,72286 |
| 27,38278                                                                               | 28,32813 | 27,62819 | 28,76294 | 27,96752 | 27,93703 | 27,80538 | 27,67324 | 28,35288 |
| 29,42906                                                                               | 29,21403 | 29,45862 | 29,81929 | 30,12657 | 29,93551 | 29,57002 | 29,90985 | 30,32152 |
| 29,70731                                                                               | 30,41084 | 27,82766 | 27,80655 | 27,55391 | 26,67101 | 28,73386 | 28,55757 | 28,7679  |
| 25,23356                                                                               | 26,33668 | 24,68886 | 24,4084  | 24,56209 | 26,16092 | 25,99401 | 23,71963 | 24,19764 |
| 28,70514                                                                               | 29,27173 | 29,10652 | 29,75592 | 29,60495 | 27,91085 | 29,09439 | 23,45103 | 29,32959 |
| 28,92337                                                                               | 29,32068 | 29,82935 | 28,1907  | 29,30967 | 28,75875 | 28,64375 | 28,84852 | 28,08639 |
| 28,39334                                                                               | 29,27344 | 27,98462 | 25,62171 | 25,95491 | 26,39537 | 27,39174 | 27,75786 | 27,45301 |
| 28,35368                                                                               | 27,61267 | 26,77128 | 27,12001 | 23,49497 | 27,9723  | 28,18461 | 28,13506 | 27,65928 |
| 26,15244                                                                               | 28,02205 | 27,40251 | 22,93626 | 21,8841  | 27,4373  | 28,38414 | 22,43506 | 21,28574 |
| 28,20592                                                                               | 29,57266 | 28,76135 | 28,06327 | 28,50116 | 28,72306 | 29,16674 | 27,72468 | 28,35069 |
| 37,42421                                                                               | 38,73302 | 38,14632 | 37,56347 | 37,76457 | 39,12461 | 39,19818 | 38,10963 | 38,10559 |
| 24,86815                                                                               | 25,55318 | 24,44979 | 26,60399 | 26,9215  | 27,41828 | 26,91969 | 25,86976 | 26,79687 |
| 30,00437                                                                               | 30,95768 | 31,37932 | 29,33731 | 29,04497 | 31,8546  | 31,86924 | 29,74962 | 29,76882 |
| 33,4021                                                                                | 33,25462 | 32,80859 | 33,53125 | 33,70419 | 33,37244 | 33,57678 | 33,78107 | 33,82231 |
| 22,39099                                                                               | 22,82568 | 23,34163 | 29,5508  | 30,38618 | 27,79123 | 22,99408 | 31,32254 | 31,28312 |
| 23,98237                                                                               | 23,15892 | 23,08046 | 28,98454 | 28,68949 | 22,54555 | 22,31535 | 29,65041 | 29,91613 |
| 25,87103                                                                               | 22,70381 | 27,51443 | 28,61765 | 29,86532 | 24,29221 | 26,28829 | 29,95421 | 28,29167 |
| 6MJEO_HU tr A0A1D6ZNI8 A0A1D6ZNI8_HUMAN MHC class I antigen (Fragment) OS=Homo sapiens |          |          |          |          |          |          |          |          |
| 22,87294                                                                               | 22,8583  | 23,72993 | 27,1518  | 23,52378 | 22,30649 | 21,8716  | 28,1249  | 28,01036 |
| 23,24184                                                                               | 25,25133 | 23,87793 | 22,94744 | 22,44208 | 24,57404 | 24,97657 | 23,29908 | 22,72538 |
| 24,52641                                                                               | 24,32745 | 22,21216 | 29,76836 | 29,95754 | 30,88103 | 31,05601 | 30,82533 | 29,67459 |
| 30,33947                                                                               | 28,09894 | 28,59385 | 30,34794 | 29,98726 | 29,70336 | 30,16591 | 29,10734 | 29,01404 |
| 28,38681                                                                               | 28,48585 | 28,70879 | 29,32706 | 30,13516 | 28,76816 | 28,2122  | 29,11647 | 28,88899 |
| 28,80649                                                                               | 28,7424  | 28,63395 | 28,24127 | 28,88405 | 28,61041 | 28,39844 | 28,49209 | 28,58223 |
| 33,24076                                                                               | 33,12498 | 33,48015 | 33,36071 | 33,09248 | 32,49522 | 32,63644 | 32,6707  | 32,82423 |

|          |          |          |          |          |          |          |          |          |
|----------|----------|----------|----------|----------|----------|----------|----------|----------|
| 30,90821 | 30,49895 | 28,22628 | 29,54652 | 29,25636 | 29,20595 | 29,30136 | 30,01185 | 30,42352 |
| 27,32672 | 27,07816 | 27,07908 | 23,25214 | 21,07985 | 26,08558 | 22,13194 | 20,47863 | 22,74585 |
| 30,37223 | 31,0658  | 30,05453 | 30,20233 | 30,64341 | 30,85162 | 22,18038 | 30,42542 | 30,56047 |
| 32,99998 | 30,75756 | 31,38283 | 34,14186 | 33,95593 | 33,23891 | 32,67272 | 33,22777 | 33,01876 |
| 23,78987 | 22,73767 | 24,36073 | 22,48009 | 28,41708 | 23,01492 | 22,59114 | 29,18362 | 29,21988 |
| 27,43913 | 28,14739 | 24,51552 | 28,59602 | 28,23759 | 22,3943  | 27,99841 | 22,1329  | 27,55054 |
| 27,87079 | 28,04323 | 27,51668 | 27,61996 | 27,93326 | 27,3379  | 27,7082  | 29,23938 | 29,22041 |

| LFQ intens | LFQ intens | Potential c | Student's T | Student's T | Peptides | Razor + un | Unique peptides | Sequence coverage |
|------------|------------|-------------|-------------|-------------|----------|------------|-----------------|-------------------|
| 3          | 3          |             |             |             |          |            |                 |                   |
| 30,2014    | 30,51841   | +           |             |             | 11       | 11         | 11              | 75,3              |
| 27,47568   | 32,87364   | +           |             |             | 28       | 28         | 6               | 64,6              |
| 22,47785   | 30,51427   | +           | +           | 1_2         | 29       | 17         | 3               | 46,1              |
| 22,98594   | 25,6666    | +           |             |             | 24       | 13         | 13              | 55                |
| 24,41796   | 24,93535   | +           |             |             | 20       | 17         | 16              | 43,5              |
| 27,7845    | 34,07933   | +           |             |             | 34       | 34         | 8               | 45,3              |
| 25,49537   | 22,65014   | +           |             |             | 16       | 15         | 15              | 41,6              |
| 20,61423   | 30,23261   | +           |             |             | 25       | 13         | 12              | 57,6              |
| 27,20592   | 22,63946   |             |             |             | 2        | 2          | 2               | 28,6              |
| 21,7265    | 20,35057   |             |             |             | 2        | 2          | 2               | 18,8              |
| 30,30171   | 30,06201   |             |             |             | 18       | 18         | 3               | 26,5              |
| 23,09436   | 24,24235   |             |             |             | 3        | 3          | 3               | 5,1               |
| 34,17042   | 33,84652   |             |             |             | 70       | 70         | 70              | 51,8              |
| 24,45632   | 25,07292   |             |             |             | 4        | 4          | 1               | 18,2              |
| 32,66465   | 32,65151   |             |             |             | 21       | 21         | 6               | 63,5              |
| 22,90845   | 23,64265   |             |             |             | 2        | 2          | 2               | 5,9               |
| 21,30471   | 22,27878   |             |             |             | 2        | 2          | 2               | 12,3              |
| 33,04968   | 32,51022   |             |             |             | 105      | 105        | 105             | 39,2              |
| 26,48228   | 27,71646   |             |             |             | 11       | 11         | 1               | 22,7              |
| 28,66848   | 29,82502   |             |             |             | 30       | 22         | 22              | 42,2              |
| 26,17122   | 25,20165   |             |             |             | 5        | 5          | 5               | 6,2               |
| 31,53765   | 30,2683    |             |             |             | 5        | 5          | 5               | 39,7              |
| 27,15528   | 27,30669   |             |             |             | 8        | 8          | 6               | 30,8              |
| 21,97597   | 22,60404   |             |             |             | 3        | 3          | 3               | 11,3              |
| 28,50199   | 28,15764   |             |             |             | 11       | 11         | 11              | 20,3              |
| 27,83786   | 29,16813   |             |             |             | 27       | 27         | 26              | 14,9              |
| 21,99211   | 27,43643   |             |             |             | 10       | 10         | 10              | 29,8              |
| 22,73737   | 24,74796   |             |             |             | 6        | 6          | 6               | 7,4               |
| 28,69604   | 29,52217   |             |             |             | 5        | 5          | 5               | 31,7              |
| 29,86137   | 27,6372    |             |             |             | 6        | 6          | 6               | 25,6              |
| 33,09179   | 33,19459   |             |             |             | 37       | 37         | 1               | 43,9              |
| 28,13501   | 22,22175   |             |             |             | 5        | 5          | 5               | 20,9              |
| 23,22935   | 26,05658   |             |             |             | 4        | 4          | 4               | 18,4              |
| 28,74945   | 29,10052   |             |             |             | 8        | 8          | 8               | 43                |
| 29,64069   | 30,2934    |             |             |             | 15       | 15         | 14              | 51,5              |
| 22,70791   | 24,7093    |             |             |             | 4        | 4          | 4               | 10,8              |
| 25,40788   | 25,35387   |             |             |             | 3        | 3          | 3               | 12,3              |
| 28,20741   | 25,89396   |             |             |             | 8        | 8          | 8               | 14,8              |
| 27,99145   | 27,2674    | +           | +           | 1_2         | 26       | 26         | 24              | 21,6              |
| 31,44618   | 31,4631    |             |             |             | 8        | 8          | 8               | 83,2              |
| 29,78757   | 29,64566   |             |             |             | 7        | 7          | 7               | 50,7              |
| 28,67182   | 28,42146   |             |             |             | 11       | 11         | 11              | 15,4              |
| 32,01475   | 31,72012   |             |             |             | 2        | 2          | 2               | 29,8              |
| 22,40927   | 24,00084   |             |             |             | 2        | 2          | 2               | 30,8              |
| 22,03864   | 25,182     |             |             |             | 4        | 4          | 4               | 11                |
| 28,0004    | 27,1547    |             |             |             | 3        | 3          | 3               | 17                |
| 27,53148   | 28,49377   |             |             |             | 16       | 16         | 16              | 24,1              |
| 31,20432   | 31,15551   |             |             |             | 15       | 15         | 7               | 46,7              |



|          |          |   |     |     |    |    |      |
|----------|----------|---|-----|-----|----|----|------|
| 23,92379 | 23,30522 |   |     | 110 | 2  | 0  | 59,9 |
| 22,62042 | 23,47148 |   |     | 1   | 1  | 1  | 6,3  |
| 39,64786 | 40,11942 |   |     | 83  | 83 | 1  | 86,4 |
| 27,70807 | 29,21914 |   |     | 9   | 9  | 9  | 29,7 |
| 31,4446  | 31,74186 |   |     | 16  | 16 | 16 | 42   |
| 29,4308  | 29,30269 |   |     | 12  | 12 | 10 | 34,2 |
| 23,66297 | 23,16938 |   |     | 3   | 3  | 3  | 58,2 |
| 26,87853 | 25,42037 |   |     | 7   | 7  | 7  | 29,2 |
| 26,64623 | 27,34528 |   |     | 6   | 6  | 6  | 28,4 |
| 27,07296 | 27,94229 | + |     | 25  | 19 | 14 | 37,6 |
| 29,44583 | 25,93578 |   |     | 9   | 9  | 9  | 37,3 |
| 27,75168 | 23,33238 |   |     | 3   | 3  | 3  | 20,6 |
| 34,82941 | 34,81855 |   |     | 27  | 27 | 25 | 47,5 |
| 28,28476 | 28,96832 |   |     | 4   | 4  | 4  | 39,8 |
| 28,11083 | 27,75443 |   |     | 11  | 11 | 11 | 39   |
| 32,45405 | 31,01618 |   |     | 10  | 10 | 10 | 39,6 |
| 24,05117 | 25,27188 |   |     | 6   | 6  | 6  | 15,6 |
| 24,60162 | 24,63229 |   |     | 3   | 3  | 3  | 37,4 |
| 26,54038 | 26,44435 |   |     | 7   | 7  | 7  | 10,9 |
| 27,71581 | 28,31799 | + |     | 10  | 10 | 10 | 14,5 |
| 26,22245 | 28,21919 |   |     | 4   | 4  | 4  | 44,7 |
| 31,98512 | 33,03262 |   |     | 4   | 4  | 4  | 45,9 |
| 30,21188 | 29,05245 |   |     | 18  | 18 | 18 | 51,6 |
| 24,57097 | 25,78114 |   |     | 7   | 7  | 7  | 15,4 |
| 28,89888 | 29,60247 |   |     | 6   | 6  | 6  | 27,9 |
| 29,71363 | 21,02804 | + | 1_2 | 6   | 6  | 3  | 21,1 |
| 30,15231 | 27,78332 |   |     | 12  | 12 | 12 | 40,7 |
| 28,83533 | 29,82773 | + | 1_2 | 11  | 10 | 10 | 39,3 |
| 30,02472 | 31,08278 |   |     | 17  | 17 | 17 | 39,8 |
| 27,06497 | 27,54687 |   |     | 9   | 9  | 9  | 30,1 |
| 29,83017 | 30,49486 |   |     | 22  | 22 | 22 | 65,2 |
| 30,98352 | 31,59513 |   |     | 18  | 18 | 18 | 43,9 |
| 22,2937  | 25,29489 |   |     | 5   | 4  | 4  | 16,9 |
| 30,88074 | 30,92825 |   |     | 9   | 9  | 9  | 82,1 |
| 29,10702 | 29,76517 |   |     | 12  | 12 | 12 | 42,5 |
| 32,33111 | 31,71759 |   |     | 51  | 51 | 51 | 36,5 |
| 36,31932 | 36,28361 |   |     | 72  | 72 | 1  | 67,9 |
| 28,00443 | 28,85103 |   |     | 14  | 14 | 6  | 24,7 |
| 32,10793 | 32,37233 |   |     | 22  | 22 | 22 | 54,9 |
| 29,07694 | 28,57261 |   |     | 12  | 12 | 12 | 10   |
| 26,96939 | 28,13036 |   |     | 10  | 10 | 10 | 7,7  |
| 23,22929 | 22,0688  |   |     | 8   | 7  | 6  | 16,5 |
| 27,87085 | 28,74871 |   |     | 9   | 9  | 9  | 36,2 |
| 25,1225  | 24,67659 |   |     | 3   | 3  | 3  | 25,9 |
| 27,05258 | 26,74098 |   |     | 5   | 5  | 5  | 45,8 |
| 30,39489 | 27,65663 |   |     | 6   | 6  | 6  | 60   |
| 31,25496 | 30,96279 |   |     | 13  | 13 | 13 | 49,5 |
| 24,57306 | 24,00873 | + | 1_2 | 5   | 5  | 5  | 15   |
| 26,72481 | 27,25836 |   |     | 5   | 5  | 5  | 61   |
| 24,13085 | 22,86091 |   |     | 2   | 2  | 2  | 9,1  |

|          |          |   |     |    |    |    |      |
|----------|----------|---|-----|----|----|----|------|
| 23,92615 | 23,37663 |   |     | 9  | 6  | 4  | 16,8 |
| 28,17312 | 28,36102 |   |     | 7  | 7  | 7  | 57,7 |
| 29,11195 | 29,22637 |   |     | 28 | 28 | 28 | 20,2 |
| 26,89631 | 29,84933 |   |     | 3  | 3  | 3  | 32,4 |
| 31,51267 | 32,05937 |   |     | 26 | 26 | 26 | 45   |
| 32,76289 | 32,05148 |   |     | 57 | 57 | 57 | 48,3 |
| 29,70504 | 29,26924 |   |     | 15 | 15 | 12 | 28,5 |
| 28,65591 | 27,46544 |   |     | 8  | 8  | 8  | 11,1 |
| 30,71367 | 32,10659 |   |     | 31 | 31 | 23 | 45,9 |
| 27,3973  | 27,80489 |   |     | 8  | 8  | 8  | 17,3 |
| 28,72972 | 22,85296 |   |     | 2  | 2  | 2  | 10,4 |
| 25,12684 | 26,26031 |   |     | 9  | 9  | 9  | 15,2 |
| 28,37927 | 29,38264 |   |     | 15 | 15 | 15 | 23,4 |
| 27,25638 | 27,37219 |   |     | 4  | 4  | 4  | 25,6 |
| 22,38684 | 22,3639  |   |     | 4  | 4  | 3  | 10,7 |
| 27,63235 | 27,59278 |   |     | 4  | 4  | 4  | 36,9 |
| 28,08208 | 23,7703  |   |     | 1  | 1  | 1  | 8,2  |
| 28,57841 | 27,46669 |   |     | 15 | 15 | 15 | 18   |
| 27,10059 | 25,79726 |   |     | 7  | 7  | 7  | 16   |
| 28,42266 | 27,61982 |   |     | 14 | 13 | 4  | 23,6 |
| 22,04314 | 28,46303 |   |     | 4  | 4  | 4  | 15,5 |
| 21,42224 | 19,70838 |   |     | 2  | 2  | 2  | 26,9 |
| 26,05842 | 25,92295 |   |     | 3  | 3  | 3  | 6,1  |
| 28,12357 | 28,34177 |   |     | 7  | 7  | 7  | 24,2 |
| 25,89375 | 25,32711 |   |     | 6  | 6  | 6  | 35,2 |
| 30,21547 | 31,61986 |   |     | 5  | 5  | 5  | 6,6  |
| 26,86962 | 27,13985 |   |     | 14 | 14 | 14 | 17,7 |
| 27,85822 | 27,64877 |   |     | 6  | 6  | 6  | 51,3 |
| 25,46955 | 25,74981 |   |     | 8  | 8  | 8  | 9,4  |
| 26,56551 | 26,61526 |   |     | 5  | 5  | 5  | 26   |
| 33,19407 | 32,88736 |   |     | 18 | 18 | 18 | 65,3 |
| 24,02359 | 22,4964  | + | 1_2 | 2  | 2  | 2  | 21,4 |
| 26,76648 | 26,63948 |   |     | 4  | 4  | 4  | 20   |
| 26,27837 | 27,31769 |   |     | 25 | 24 | 24 | 15,3 |
| 30,8017  | 30,96237 |   |     | 8  | 8  | 8  | 53,4 |
| 28,90058 | 26,61583 |   |     | 5  | 5  | 5  | 17,7 |
| 25,07916 | 26,10211 |   |     | 3  | 3  | 3  | 29,8 |
| 26,33712 | 26,60964 |   |     | 7  | 7  | 7  | 13,5 |
| 28,69315 | 30,06625 |   |     | 5  | 5  | 2  | 31,8 |
| 27,77335 | 31,74053 |   |     | 5  | 5  | 3  | 70,8 |
| 30,15906 | 27,11862 |   |     | 5  | 5  | 5  | 23,6 |
| 30,52318 | 30,37389 |   |     | 13 | 13 | 4  | 30,9 |
| 28,05698 | 27,26785 |   |     | 15 | 15 | 15 | 19,5 |
| 29,78983 | 31,10905 |   |     | 7  | 7  | 7  | 33,2 |
| 27,1057  | 25,89901 |   |     | 7  | 7  | 7  | 38,2 |
| 23,78566 | 25,39061 |   |     | 58 | 1  | 0  | 42,8 |
| 27,3946  | 27,05765 | + | 1_2 | 13 | 13 | 13 | 5,9  |
| 21,65471 | 23,13136 |   |     | 5  | 5  | 5  | 21,4 |
| 23,61605 | 24,59007 |   |     | 4  | 4  | 4  | 26,8 |
| 23,14555 | 22,7834  |   |     | 2  | 2  | 2  | 2,7  |

|          |          |   |     |    |    |    |      |
|----------|----------|---|-----|----|----|----|------|
| 28,86994 | 27,17207 |   |     | 11 | 11 | 11 | 19,1 |
| 31,98077 | 32,86765 |   |     | 15 | 15 | 15 | 56,2 |
| 22,87529 | 22,73595 |   |     | 4  | 4  | 4  | 14,1 |
| 21,57464 | 22,0971  |   |     | 2  | 2  | 2  | 12   |
| 32,67082 | 32,5158  |   |     | 21 | 21 | 21 | 46,5 |
| 34,00018 | 33,87317 |   |     | 7  | 7  | 7  | 46,9 |
| 25,26338 | 22,54016 |   |     | 4  | 4  | 4  | 18,5 |
| 27,91239 | 27,94665 |   |     | 12 | 12 | 12 | 25,8 |
| 26,32445 | 27,66452 |   |     | 4  | 4  | 4  | 24,1 |
| 28,50994 | 28,98076 |   |     | 11 | 11 | 9  | 25,8 |
| 28,68656 | 28,03889 |   |     | 5  | 5  | 5  | 6,9  |
| 30,83771 | 30,31084 |   |     | 5  | 5  | 5  | 32,7 |
| 21,06007 | 22,18177 |   |     | 2  | 2  | 2  | 17   |
| 27,67283 | 26,34415 |   |     | 10 | 4  | 4  | 43,4 |
| 31,81867 | 31,29975 |   |     | 16 | 16 | 13 | 59,3 |
| 29,81967 | 29,82792 |   |     | 5  | 5  | 5  | 41,9 |
| 24,82182 | 23,49875 |   |     | 5  | 5  | 5  | 4,1  |
| 30,07202 | 30,27487 |   |     | 16 | 16 | 16 | 39,6 |
| 22,25546 | 22,98968 |   |     | 1  | 1  | 1  | 4,9  |
| 27,52447 | 26,34316 |   |     | 21 | 18 | 18 | 24,7 |
| 27,55772 | 25,58446 |   |     | 23 | 23 | 23 | 8,7  |
| 29,45405 | 30,24762 |   |     | 32 | 32 | 32 | 21,5 |
| 24,94864 | 24,56889 |   |     | 3  | 3  | 1  | 9,6  |
| 27,70299 | 28,13775 |   |     | 10 | 10 | 10 | 52,9 |
| 28,78176 | 29,24681 |   |     | 7  | 7  | 7  | 6,7  |
| 25,67694 | 26,49496 |   |     | 5  | 5  | 5  | 20,7 |
| 23,256   | 22,54659 |   |     | 5  | 5  | 5  | 8,3  |
| 23,00335 | 21,34792 |   |     | 1  | 1  | 1  | 9,6  |
| 28,78924 | 27,59662 |   |     | 3  | 3  | 3  | 25,7 |
| 24,47914 | 25,04635 |   |     | 7  | 7  | 7  | 4,8  |
| 27,32002 | 22,81877 |   |     | 7  | 7  | 7  | 20,5 |
| 26,27046 | 26,74638 |   |     | 4  | 4  | 4  | 24,1 |
| 28,38718 | 28,44249 |   |     | 8  | 8  | 8  | 15,9 |
| 22,26167 | 24,22538 |   |     | 3  | 3  | 3  | 36,3 |
| 27,73596 | 27,54768 |   |     | 5  | 5  | 5  | 21   |
| 23,00949 | 22,52667 | + | 1_2 | 3  | 3  | 3  | 9,7  |
| 29,14936 | 26,91319 |   |     | 2  | 2  | 2  | 12,4 |
| 28,95333 | 26,63533 |   |     | 10 | 10 | 10 | 29   |
| 22,11832 | 21,33434 |   |     | 5  | 5  | 5  | 13,2 |
| 23,93957 | 25,17268 |   |     | 4  | 4  | 4  | 25,8 |
| 22,14252 | 20,9939  |   |     | 3  | 3  | 3  | 3    |
| 26,73195 | 26,98663 |   |     | 3  | 3  | 3  | 4,5  |
| 22,43952 | 22,41341 |   |     | 2  | 2  | 2  | 21,8 |
| 29,07181 | 30,04101 |   |     | 8  | 8  | 8  | 52,6 |
| 24,93472 | 26,07812 |   |     | 4  | 4  | 4  | 27,7 |
| 34,96456 | 35,41516 |   |     | 5  | 5  | 5  | 43,7 |
| 29,41357 | 29,77698 |   |     | 8  | 8  | 8  | 60,3 |
| 26,50303 | 27,1378  |   |     | 11 | 8  | 7  | 46,6 |
| 28,1601  | 27,92818 |   |     | 15 | 12 | 12 | 54,9 |
| 27,64678 | 27,53942 |   |     | 5  | 5  | 5  | 70,5 |

|          |          |   |     |    |    |    |      |
|----------|----------|---|-----|----|----|----|------|
| 29,54481 | 31,90203 |   |     | 5  | 5  | 5  | 38,8 |
| 24,96899 | 21,43893 |   |     | 7  | 7  | 7  | 53,9 |
| 27,2516  | 28,17016 |   |     | 3  | 3  | 3  | 41,7 |
| 31,04785 | 30,74214 |   |     | 14 | 11 | 9  | 55,5 |
| 31,69387 | 30,24853 |   |     | 17 | 17 | 1  | 61,6 |
| 29,0922  | 28,78609 |   |     | 2  | 2  | 2  | 50   |
| 29,28701 | 29,04679 |   |     | 7  | 7  | 7  | 17,1 |
| 32,14659 | 31,15158 |   |     | 24 | 24 | 24 | 30,1 |
| 21,26774 | 22,32003 |   |     | 4  | 4  | 4  | 31,3 |
| 27,65055 | 23,1283  |   |     | 7  | 5  | 5  | 18,3 |
| 26,42686 | 26,03687 |   |     | 5  | 5  | 5  | 5,7  |
| 28,51273 | 28,56779 |   |     | 4  | 4  | 4  | 21,7 |
| 27,57795 | 29,18182 |   |     | 6  | 6  | 1  | 46,6 |
| 27,09225 | 28,22246 |   |     | 3  | 3  | 3  | 5,5  |
| 29,84894 | 30,19507 |   |     | 26 | 26 | 26 | 14,1 |
| 25,31316 | 25,29635 |   |     | 9  | 9  | 9  | 15,5 |
| 32,44586 | 31,76228 |   |     | 24 | 24 | 22 | 52,5 |
| 31,15672 | 31,89638 |   |     | 20 | 18 | 18 | 35,5 |
| 29,70914 | 30,1343  |   |     | 7  | 7  | 6  | 39,2 |
| 26,46579 | 27,45513 |   |     | 4  | 4  | 4  | 7,2  |
| 27,99394 | 28,1456  |   |     | 10 | 10 | 10 | 11,9 |
| 34,5739  | 34,16121 | + | 1_2 | 22 | 22 | 22 | 49,7 |
| 27,55223 | 26,41745 |   |     | 8  | 8  | 8  | 14,8 |
| 28,96058 | 28,41216 |   |     | 11 | 11 | 11 | 35,6 |
| 32,60213 | 32,57786 |   |     | 16 | 16 | 16 | 58,4 |
| 22,94758 | 26,84122 |   |     | 13 | 13 | 13 | 15,3 |
| 26,62324 | 25,73244 |   |     | 7  | 7  | 7  | 28,2 |
| 27,94559 | 28,32633 |   |     | 10 | 10 | 10 | 18,4 |
| 27,50945 | 21,8165  |   |     | 3  | 3  | 3  | 12,7 |
| 27,4753  | 21,95672 |   |     | 6  | 6  | 6  | 11,3 |
| 31,08087 | 31,5073  |   |     | 44 | 44 | 44 | 56,1 |
| 36,06305 | 35,62631 |   |     | 61 | 61 | 61 | 61,7 |
| 28,53118 | 27,55538 |   |     | 10 | 10 | 10 | 17,7 |
| 26,15883 | 27,18782 |   |     | 9  | 9  | 9  | 22,3 |
| 32,42542 | 33,33165 |   |     | 8  | 8  | 8  | 34,6 |
| 30,00945 | 29,20506 |   |     | 15 | 15 | 14 | 11,9 |
| 25,21656 | 26,79588 |   |     | 5  | 5  | 5  | 20,4 |
| 21,35252 | 22,27447 |   |     | 15 | 15 | 13 | 3,9  |
| 26,00071 | 26,82784 |   |     | 3  | 3  | 3  | 13,3 |
| 27,75983 | 26,20253 |   |     | 11 | 11 | 11 | 21,4 |
| 31,54209 | 30,68813 |   |     | 22 | 22 | 22 | 41,3 |
| 32,87197 | 32,17173 |   |     | 14 | 14 | 14 | 56,4 |
| 30,22159 | 30,5139  |   |     | 21 | 21 | 21 | 47,2 |
| 25,88159 | 25,53074 |   |     | 7  | 7  | 7  | 20,1 |
| 29,96472 | 30,12312 |   |     | 8  | 8  | 8  | 29,9 |
| 32,42114 | 32,80205 |   |     | 60 | 60 | 60 | 45,6 |
| 26,91547 | 26,26469 |   |     | 9  | 9  | 9  | 13,7 |
| 21,97225 | 24,02431 |   |     | 4  | 4  | 1  | 23,3 |
| 25,49308 | 26,83062 |   |     | 3  | 3  | 3  | 8,4  |
| 27,33151 | 21,88122 |   |     | 4  | 4  | 4  | 10,7 |

|                                                                                       |          |   |     |     |     |    |      |
|---------------------------------------------------------------------------------------|----------|---|-----|-----|-----|----|------|
| 30,30726                                                                              | 29,43418 |   |     | 28  | 28  | 28 | 17,4 |
| 26,47011                                                                              | 27,54532 |   |     | 16  | 16  | 16 | 17,9 |
| 22,41431                                                                              | 22,69217 |   |     | 5   | 5   | 5  | 11,5 |
| 28,52671                                                                              | 28,23622 |   |     | 10  | 10  | 10 | 21,5 |
| 30,34742                                                                              | 29,24407 |   |     | 14  | 14  | 14 | 15,9 |
| 28,11709                                                                              | 26,58892 |   |     | 13  | 13  | 13 | 20,8 |
| 32,61489                                                                              | 30,55344 |   |     | 19  | 19  | 19 | 42,2 |
| 22,95408                                                                              | 22,2762  |   |     | 5   | 5   | 5  | 13,7 |
| 24,72858                                                                              | 26,61933 |   |     | 5   | 5   | 5  | 25,6 |
| 27,61253                                                                              | 28,66075 |   |     | 20  | 20  | 20 | 18,2 |
| 29,72728                                                                              | 30,19507 |   |     | 9   | 9   | 9  | 29,4 |
| 24,67632                                                                              | 24,27049 |   |     | 7   | 7   | 7  | 7,9  |
| 28,45254                                                                              | 29,0643  |   |     | 17  | 17  | 17 | 14,8 |
| 25,69238                                                                              | 26,59235 |   |     | 2   | 2   | 2  | 12,5 |
| 26,92411                                                                              | 23,56164 |   |     | 4   | 4   | 4  | 26,5 |
| 26,54432                                                                              | 25,27501 |   |     | 5   | 5   | 5  | 16,8 |
| 28,464                                                                                | 30,06381 |   |     | 46  | 46  | 46 | 21,2 |
| 30,00223                                                                              | 29,88217 |   |     | 16  | 16  | 16 | 28,4 |
| 22,24566                                                                              | 23,55415 |   |     | 3   | 3   | 3  | 34,1 |
| 28,83843                                                                              | 28,87059 |   |     | 7   | 7   | 7  | 37,1 |
| 28,83699                                                                              | 28,58405 |   |     | 11  | 11  | 11 | 36   |
| 28,34401                                                                              | 22,16493 |   |     | 4   | 4   | 4  | 74,2 |
| 26,7057                                                                               | 26,33868 |   |     | 8   | 8   | 8  | 10,1 |
| 22,79165                                                                              | 25,97412 |   |     | 9   | 9   | 9  | 5,5  |
| 27,25422                                                                              | 27,97208 |   |     | 18  | 18  | 18 | 27,5 |
| 28,57124                                                                              | 28,5634  |   |     | 9   | 9   | 9  | 9,7  |
| 30,01492                                                                              | 30,15846 |   |     | 10  | 10  | 1  | 43,1 |
| 27,71967                                                                              | 29,03572 |   |     | 4   | 4   | 4  | 15,2 |
| 23,18006                                                                              | 22,52028 |   |     | 4   | 4   | 4  | 17,4 |
| 24,1877                                                                               | 29,62633 |   |     | 10  | 10  | 10 | 7,1  |
| 29,00566                                                                              | 21,58528 |   |     | 5   | 5   | 5  | 25,6 |
| 26,76497                                                                              | 27,97405 |   |     | 7   | 7   | 7  | 39,7 |
| 27,5837                                                                               | 27,0662  |   |     | 10  | 10  | 10 | 16,5 |
| 22,62                                                                                 | 27,64911 |   |     | 8   | 8   | 8  | 11,6 |
| 28,01845                                                                              | 28,46404 |   |     | 6   | 6   | 6  | 17,9 |
| 38,09501                                                                              | 37,49905 |   |     | 111 | 111 | 0  | 62,5 |
| 26,64072                                                                              | 25,56842 | + | 1_2 | 6   | 6   | 6  | 34,8 |
| 29,53185                                                                              | 31,83665 |   |     | 59  | 59  | 1  | 43,7 |
| 33,70913                                                                              | 33,52402 |   |     | 106 | 106 | 49 | 36,7 |
| 30,96747                                                                              | 22,67339 |   |     | 3   | 3   | 1  | 20,3 |
| 29,75681                                                                              | 27,0701  |   |     | 13  | 8   | 0  | 39,6 |
| 29,24266                                                                              | 26,092   |   |     | 14  | 14  | 0  | 56   |
| ; OX=9606 GN=HLA-A PE=3 SV=1;tr A0A0S4XRM0 A0A0S4XRM0_HUMAN MHC class I antigen OS=Hs |          |   |     |     |     |    |      |
| 28,1209                                                                               | 25,79025 |   |     | 2   | 1   | 0  | 12,2 |
| 23,26055                                                                              | 23,22372 |   |     | 110 | 2   | 0  | 67   |
| 29,61569                                                                              | 29,87948 | + | 1_2 | 18  | 18  | 17 | 36,4 |
| 29,35323                                                                              | 29,58923 |   |     | 5   | 5   | 1  | 4,8  |
| 28,84999                                                                              | 29,16181 |   |     | 6   | 6   | 1  | 50   |
| 28,45846                                                                              | 28,02797 |   |     | 7   | 7   | 0  | 19,1 |
| 32,39971                                                                              | 32,94805 |   |     | 82  | 3   | 2  | 86,1 |

|          |          |    |    |    |      |
|----------|----------|----|----|----|------|
| 30,16651 | 29,49446 | 20 | 20 | 20 | 36,6 |
| 22,94437 | 23,02712 | 8  | 1  | 1  | 82,7 |
| 30,73651 | 31,21477 | 11 | 1  | 1  | 57,5 |
| 33,11114 | 32,84277 | 24 | 24 | 24 | 64,3 |
| 30,15279 | 22,7509  | 13 | 2  | 0  | 41,5 |
| 28,35001 | 28,34202 | 3  | 3  | 3  | 27   |
| 29,24386 | 28,63159 | 12 | 12 | 12 | 41   |

| Unique + r | Unique sec | Mol. weight | Q-value | Score  | Intensity | MS/MS col | iBAQ 1-1 | iBAQ 1-3 |
|------------|------------|-------------|---------|--------|-----------|-----------|----------|----------|
| 75,3       | 75,3       | 24,409      | 0       | 97,144 | 1,29E+10  | 56        | 72499000 | 1,6E+08  |
| 64,6       | 21,4       | 51,621      | 0       | 323,31 | 2,44E+10  | 173       | 1,75E+08 | 1,43E+08 |
| 31,7       | 6,7        | 58,536      | 0       | 132,71 | 9,64E+09  | 86        | 53050000 | 60895000 |
| 34,5       | 34,5       | 51,267      | 0       | 187,1  | 1,04E+09  | 26        | 589190   | 5860500  |
| 39,6       | 37,7       | 58,826      | 0       | 285,48 | 1,13E+09  | 36        | 7393700  | 413300   |
| 45,3       | 9,3        | 62,378      | 0       | 323,31 | 6,27E+10  | 186       | 4,88E+08 | 2,73E+08 |
| 40,4       | 40,4       | 62,129      | 0       | 323,31 | 1,21E+09  | 33        | 57599    | 1043400  |
| 37,7       | 35,4       | 48,105      | 0       | 292,46 | 3,9E+09   | 76        | 18414000 | 28835000 |
| 28,6       | 28,6       | 11,29       | 0       | 91,897 | 8,87E+08  | 19        | 0        | 100850   |
| 18,8       | 18,8       | 26,793      | 0       | 4,8618 | 17190000  | 16        | 64148    | 44043    |
| 26,5       | 4,4        | 82,577      | 0       | 195,5  | 1,26E+10  | 179       | 54165000 | 12210000 |
| 5,1        | 5,1        | 94,411      | 0       | 5,6156 | 61725000  | 10        | 111380   | 169530   |
| 51,8       | 51,8       | 214,84      | 0       | 323,31 | 1,21E+11  | 873       | 1,62E+08 | 41900000 |
| 18,2       | 5,7        | 32,316      | 0       | 18,095 | 3,54E+08  | 21        | 224290   | 69058    |
| 63,5       | 12,3       | 42,026      | 0       | 299,05 | 6,5E+10   | 215       | 4,69E+08 | 1,99E+08 |
| 5,9        | 5,9        | 57,896      | 0       | 5,1365 | 40824000  | 8         | 31181    | 10329    |
| 12,3       | 12,3       | 19,793      | 0       | 2,4636 | 52130000  | 8         | 452110   | 0        |
| 39,2       | 39,2       | 399,73      | 0       | 323,31 | 6,03E+10  | 783       | 50947000 | 19382000 |
| 22,7       | 1,5        | 58,397      | 0       | 50,188 | 1,25E+09  | 50        | 1198200  | 736720   |
| 33,2       | 33,2       | 104,85      | 0       | 182,3  | 3,99E+09  | 98        | 9785600  | 10522000 |
| 6,2        | 6,2        | 116,43      | 0       | 15,039 | 3,87E+08  | 18        | 871770   | 230690   |
| 39,7       | 39,7       | 13,89       | 0       | 101,98 | 1,68E+10  | 52        | 3,75E+08 | 1,23E+08 |
| 30,8       | 28,4       | 37,371      | 0       | 10,842 | 9,27E+08  | 27        | 8190000  | 9313400  |
| 11,3       | 11,3       | 47,984      | 0       | 2,6777 | 2,77E+09  | 7         | 23685000 | 17189000 |
| 20,3       | 20,3       | 74,823      | 0       | 15,573 | 1,83E+09  | 39        | 3527200  | 1954600  |
| 14,9       | 14,5       | 275,66      | 0       | 134,65 | 2,73E+09  | 111       | 2464100  | 2379800  |
| 29,8       | 29,8       | 41,174      | 0       | 13,75  | 1,99E+09  | 32        | 16969000 | 32253000 |
| 7,4        | 7,4        | 129,83      | 0       | 7,7814 | 3,1E+08   | 11        | 101600   | 915650   |
| 31,7       | 31,7       | 32,212      | 0       | 108,45 | 2,79E+09  | 30        | 31201000 | 18398000 |
| 25,6       | 25,6       | 28,671      | 0       | 92,323 | 4,49E+09  | 38        | 33758000 | 15949000 |
| 43,9       | 0,9        | 108,64      | 0       | 311,9  | 6,94E+10  | 333       | 2,32E+08 | 91592000 |
| 20,9       | 20,9       | 43,059      | 0       | 25,883 | 1,15E+09  | 14        | 25800000 | 0        |
| 18,4       | 18,4       | 30,497      | 0       | 31,254 | 6,3E+08   | 30        | 964530   | 11473000 |
| 43         | 43         | 24,96       | 0       | 187,45 | 4,25E+09  | 58        | 64130000 | 10672000 |
| 51,5       | 47,9       | 36,688      | 0       | 145,06 | 8,98E+09  | 81        | 89583000 | 18618000 |
| 10,8       | 10,8       | 41,326      | 0       | 4,3518 | 1,84E+08  | 10        | 126200   | 949770   |
| 12,3       | 12,3       | 41,428      | 0       | 9,2444 | 3,64E+08  | 10        | 1428400  | 864140   |
| 14,8       | 14,8       | 62,965      | 0       | 23,956 | 6,21E+08  | 21        | 0        | 0        |
| 21,6       | 20,5       | 187,15      | 0       | 220,13 | 1,57E+09  | 99        | 227840   | 107200   |
| 83,2       | 83,2       | 16,057      | 0       | 60,299 | 2,01E+10  | 126       | 3,41E+08 | 2,58E+08 |
| 50,7       | 50,7       | 15,799      | 0       | 135,39 | 9,29E+09  | 132       | 2,94E+08 | 1,11E+08 |
| 15,4       | 15,4       | 104,75      | 0       | 92,771 | 4,66E+09  | 75        | 14286000 | 13547000 |
| 29,8       | 29,8       | 10,16       | 0       | 89,507 | 5,61E+10  | 478       | 2,06E+09 | 40180000 |
| 30,8       | 30,8       | 11,765      | 0       | 10,41  | 66256000  | 18        | 1266400  | 2177600  |
| 11         | 11         | 53,224      | 0       | 6,1669 | 4,54E+08  | 15        | 5082400  | 3095100  |
| 17         | 17         | 25,331      | 0       | 251,01 | 1,1E+09   | 30        | 26111000 | 1344800  |
| 24,1       | 24,1       | 74,139      | 0       | 55,115 | 3,22E+09  | 79        | 35741000 | 5348700  |
| 46,7       | 15,5       | 36,154      | 0       | 269,99 | 1,65E+10  | 146       | 97461000 | 12038000 |

|      |      |        |   |        |          |      |          |          |
|------|------|--------|---|--------|----------|------|----------|----------|
| 1,4  | 0    | 272,32 | 0 | 52,354 | 1,58E+08 | 36   | 81907    | 203620   |
| 6,3  | 6,3  | 38,797 | 0 | 15,898 | 31980000 | 11   | 288510   | 0        |
| 86,4 | 2,7  | 77,063 | 0 | 323,31 | 8,7E+12  | 4262 | 2,62E+10 | 2,22E+10 |
| 29,7 | 29,7 | 51,676 | 0 | 36,438 | 3,51E+09 | 51   | 15293000 | 6793500  |
| 42   | 42   | 53,981 | 0 | 323,31 | 6,47E+10 | 186  | 1,07E+09 | 1,67E+08 |
| 34,2 | 30,9 | 45,26  | 0 | 52,492 | 5,88E+09 | 63   | 32043000 | 18202000 |
| 58,2 | 58,2 | 11,139 | 0 | 13,186 | 1,18E+08 | 12   | 655760   | 8601400  |
| 29,2 | 29,2 | 38,714 | 0 | 13,819 | 6,39E+08 | 30   | 4519500  | 649710   |
| 28,4 | 28,4 | 30,768 | 0 | 62,195 | 1,06E+09 | 39   | 11794000 | 6004700  |
| 32,6 | 24,5 | 66,11  | 0 | 323,31 | 4,02E+09 | 57   | 10021000 | 6480000  |
| 37,3 | 37,3 | 27,87  | 0 | 38,935 | 2,62E+09 | 45   | 63316    | 23093000 |
| 20,6 | 20,6 | 18,552 | 0 | 10,841 | 1,58E+09 | 19   | 62550000 | 14557000 |
| 47,5 | 46,3 | 84,818 | 0 | 323,31 | 2,7E+11  | 562  | 9,95E+08 | 4,66E+08 |
| 39,8 | 39,8 | 10,834 | 0 | 13,423 | 3,12E+09 | 30   | 32816000 | 61618000 |
| 39   | 39   | 46,611 | 0 | 119,95 | 1,95E+09 | 76   | 3136400  | 373360   |
| 39,6 | 39,6 | 45,059 | 0 | 127,92 | 2,24E+10 | 127  | 2,23E+08 | 20886000 |
| 15,6 | 15,6 | 49,757 | 0 | 14,252 | 1,03E+08 | 14   | 0        | 319500   |
| 37,4 | 37,4 | 11,665 | 0 | 5,8479 | 1,88E+08 | 16   | 4794900  | 1871800  |
| 10,9 | 10,9 | 88,414 | 0 | 13,238 | 7,89E+08 | 24   | 4905700  | 1217500  |
| 14,5 | 14,5 | 85,696 | 0 | 32,006 | 1,57E+09 | 42   | 6595000  | 2566100  |
| 44,7 | 44,7 | 13,21  | 0 | 24,415 | 1,31E+09 | 48   | 10455000 | 24562000 |
| 45,9 | 45,9 | 9,681  | 0 | 50,598 | 4,66E+10 | 33   | 1,25E+09 | 8,32E+08 |
| 51,6 | 51,6 | 47,168 | 0 | 201,88 | 1,16E+10 | 125  | 1,5E+08  | 13146000 |
| 15,4 | 15,4 | 67,285 | 0 | 236,24 | 2,66E+08 | 39   | 889080   | 2386100  |
| 27,9 | 27,9 | 29,464 | 0 | 87,992 | 4,77E+09 | 67   | 94962000 | 39584000 |
| 21,1 | 12,1 | 28,955 | 0 | 12,282 | 3,05E+09 | 20   | 2358100  | 0        |
| 40,7 | 40,7 | 37,157 | 0 | 219,27 | 6,22E+09 | 74   | 12932000 | 69736    |
| 35,8 | 35,8 | 37,294 | 0 | 196,48 | 6,44E+09 | 90   | 1,13E+08 | 60047000 |
| 39,8 | 39,8 | 57,116 | 0 | 185,88 | 1,13E+10 | 159  | 65829000 | 24810000 |
| 30,1 | 30,1 | 44,552 | 0 | 30,727 | 1,61E+09 | 49   | 25298000 | 13145000 |
| 65,2 | 65,2 | 38,604 | 0 | 316,74 | 1,02E+10 | 128  | 92081000 | 17935000 |
| 43,9 | 43,9 | 58,14  | 0 | 218,1  | 1,81E+10 | 133  | 84055000 | 39637000 |
| 16,9 | 16,9 | 25,5   | 0 | 7,43   | 6,56E+08 | 24   | 16929000 | 2931000  |
| 82,1 | 82,1 | 15,054 | 0 | 86,434 | 1,37E+10 | 72   | 3,27E+08 | 61809000 |
| 42,5 | 42,5 | 37,821 | 0 | 195,99 | 8,29E+09 | 87   | 32655000 | 78236000 |
| 36,5 | 36,5 | 198,04 | 0 | 323,31 | 3,76E+10 | 518  | 70880000 | 25573000 |
| 67,9 | 2,2  | 129,38 | 0 | 323,31 | 7,85E+11 | 1688 | 1,87E+09 | 1,15E+09 |
| 24,7 | 13,1 | 83,263 | 0 | 65,326 | 2,62E+09 | 73   | 9861500  | 1149200  |
| 54,9 | 54,9 | 47,472 | 0 | 221,05 | 2,57E+10 | 201  | 56633000 | 29258000 |
| 10   | 10   | 167,55 | 0 | 175,05 | 3,33E+09 | 86   | 10641000 | 1712800  |
| 7,7  | 7,7  | 157,71 | 0 | 17,316 | 1,41E+09 | 56   | 1046700  | 500800   |
| 15   | 13,1 | 53,683 | 0 | 6,8444 | 1,57E+08 | 12   | 1028000  | 0        |
| 36,2 | 36,2 | 35,936 | 0 | 24,174 | 3,46E+09 | 64   | 22675000 | 15380000 |
| 25,9 | 25,9 | 19,48  | 0 | 14,533 | 1,6E+08  | 25   | 286380   | 1611900  |
| 45,8 | 45,8 | 11,301 | 0 | 50,679 | 9,18E+08 | 36   | 4136500  | 37048    |
| 60   | 60   | 14,716 | 0 | 91,859 | 5,69E+09 | 40   | 35649000 | 3951300  |
| 49,5 | 49,5 | 34,632 | 0 | 110,35 | 2,06E+10 | 148  | 2,45E+08 | 1,22E+08 |
| 15   | 15   | 57,519 | 0 | 7,4178 | 1,92E+08 | 16   | 0        | 0        |
| 61   | 61   | 147,33 | 0 | 9,749  | 7,98E+08 | 21   | 1586300  | 116090   |
| 9,1  | 9,1  | 30,992 | 0 | 2,8125 | 71957000 | 14   | 1216100  | 501650   |



|      |      |        |   |        |          |     |          |          |
|------|------|--------|---|--------|----------|-----|----------|----------|
| 12,6 | 7,6  | 70,108 | 0 | 24,943 | 1,03E+08 | 17  | 95421    | 130300   |
| 57,7 | 57,7 | 16,837 | 0 | 49,202 | 2,96E+09 | 42  | 13041000 | 35847000 |
| 20,2 | 20,2 | 211,68 | 0 | 110,05 | 4,69E+09 | 150 | 12781000 | 5521300  |
| 32,4 | 32,4 | 11,737 | 0 | 9,2184 | 2,13E+09 | 33  | 78400000 | 39687000 |
| 45   | 45   | 72,332 | 0 | 232,6  | 1,97E+10 | 192 | 81451000 | 57684000 |
| 48,3 | 48,3 | 174,01 | 0 | 323,31 | 4,34E+10 | 395 | 81565000 | 25649000 |
| 28,5 | 24,3 | 70,897 | 0 | 95,29  | 6,82E+09 | 84  | 58448000 | 3691400  |
| 11,1 | 11,1 | 108,34 | 0 | 106,17 | 1,71E+09 | 49  | 3170500  | 255080   |
| 45,9 | 36,7 | 103,06 | 0 | 246,79 | 2,14E+10 | 294 | 60622000 | 45274000 |
| 17,3 | 17,3 | 83,822 | 0 | 53,973 | 1,36E+09 | 74  | 7130600  | 2397500  |
| 10,4 | 10,4 | 25,673 | 0 | 46,705 | 2,25E+09 | 21  | 19435000 | 8106900  |
| 15,2 | 15,2 | 95,337 | 0 | 17,914 | 4,32E+08 | 31  | 1411300  | 452630   |
| 23,4 | 23,4 | 72,932 | 0 | 26,028 | 2,34E+09 | 43  | 7107400  | 7619200  |
| 25,6 | 25,6 | 18,108 | 0 | 3,2074 | 9,67E+08 | 8   | 31137000 | 2594300  |
| 10,7 | 8,6  | 70,289 | 0 | 49,458 | 1,44E+08 | 16  | 321640   | 435020   |
| 36,9 | 36,9 | 14,529 | 0 | 11,593 | 2,24E+09 | 36  | 48669000 | 23314000 |
| 8,2  | 8,2  | 15,523 | 0 | 7,339  | 8,77E+08 | 12  | 7983200  | 0        |
| 18   | 18   | 122,02 | 0 | 73,637 | 2,05E+09 | 74  | 2874900  | 72081    |
| 16   | 16   | 57,936 | 0 | 6,1243 | 6,01E+08 | 19  | 733900   | 0        |
| 22,1 | 7,7  | 92,339 | 0 | 47,732 | 2,33E+09 | 52  | 16121000 | 2518100  |
| 15,5 | 15,5 | 39,579 | 0 | 23,514 | 2,55E+09 | 7   | 33801000 | 165960   |
| 26,9 | 26,9 | 16,729 | 0 | 13,145 | 12704000 | 11  | 100530   | 0        |
| 6,1  | 6,1  | 65,568 | 0 | 4,645  | 1,59E+08 | 11  | 27737    | 28526    |
| 24,2 | 24,2 | 27,895 | 0 | 127,02 | 1,66E+09 | 84  | 17222000 | 5135500  |
| 35,2 | 35,2 | 20,195 | 0 | 36,023 | 2,77E+08 | 23  | 1245600  | 1639600  |
| 6,6  | 6,6  | 81,537 | 0 | 11,376 | 1,74E+10 | 43  | 72686000 | 63612000 |
| 17,7 | 17,7 | 106,78 | 0 | 51,324 | 1,47E+09 | 59  | 6993100  | 634840   |
| 51,3 | 51,3 | 20,838 | 0 | 120,62 | 2,01E+09 | 73  | 40160000 | 12528000 |
| 9,4  | 9,4  | 116,74 | 0 | 15,067 | 1,84E+08 | 21  | 7116,7   | 45561    |
| 26   | 26   | 28,804 | 0 | 45,273 | 6E+08    | 26  | 0        | 6306000  |
| 65,3 | 65,3 | 34,803 | 0 | 323,31 | 6,47E+10 | 239 | 6,73E+08 | 2,1E+08  |
| 21,4 | 21,4 | 12,269 | 0 | 4,7231 | 1,89E+08 | 9   | 0        | 0        |
| 20   | 20   | 23,787 | 0 | 40,708 | 6,22E+08 | 10  | 4803700  | 388220   |
| 15   | 15   | 277,5  | 0 | 47,411 | 1,13E+09 | 69  | 869610   | 274400   |
| 53,4 | 53,4 | 14,374 | 0 | 29,647 | 1E+10    | 38  | 95637000 | 32647000 |
| 17,7 | 17,7 | 41,654 | 0 | 53,085 | 1,64E+09 | 15  | 12191000 | 0        |
| 29,8 | 29,8 | 15,906 | 0 | 38,944 | 3,47E+08 | 25  | 3365700  | 2167200  |
| 13,5 | 13,5 | 86,551 | 0 | 43,375 | 7,7E+08  | 41  | 4116200  | 399030   |
| 31,8 | 6,4  | 30,137 | 0 | 19,122 | 4,56E+09 | 37  | 53133000 | 44254000 |
| 70,8 | 46,1 | 9,8875 | 0 | 57,927 | 9,4E+09  | 36  | 1,37E+08 | 5,28E+08 |
| 23,6 | 23,6 | 27,934 | 0 | 72,268 | 3,57E+09 | 35  | 77047000 | 360870   |
| 30,9 | 8,7  | 70,154 | 0 | 67,45  | 7,24E+09 | 83  | 33291000 | 12880000 |
| 19,5 | 19,5 | 119,09 | 0 | 76,539 | 1,35E+09 | 63  | 3356300  | 677960   |
| 33,2 | 33,2 | 22,742 | 0 | 40,946 | 9,11E+09 | 63  | 1,15E+08 | 48321000 |
| 38,2 | 38,2 | 22,728 | 0 | 84,366 | 8,11E+08 | 41  | 1048000  | 659540   |
| 1    | 0    | 240,85 | 0 | 8,211  | 1,33E+08 | 13  | 97468    | 160780   |
| 5,9  | 5,9  | 337,08 | 0 | 41,513 | 1,03E+09 | 34  | 237820   | 160850   |
| 21,4 | 21,4 | 27,647 | 0 | 6,5667 | 4,4E+08  | 13  | 182900   | 13376000 |
| 26,8 | 26,8 | 21,364 | 0 | 4,6214 | 75850000 | 12  | 285670   | 217270   |
| 2,7  | 2,7  | 81,996 | 0 | 4,2977 | 5,09E+08 | 7   | 1133600  | 804460   |

|      |      |        |          |        |          |     |          |          |
|------|------|--------|----------|--------|----------|-----|----------|----------|
| 19,1 | 19,1 | 67,819 | 0        | 20,715 | 1,83E+09 | 28  | 673190   | 378960   |
| 56,2 | 56,2 | 46,918 | 0        | 154,86 | 3,41E+10 | 164 | 2,46E+08 | 1,94E+08 |
| 14,1 | 14,1 | 45,421 | 0        | 6,8391 | 2,13E+08 | 8   | 9112400  | 44635    |
| 12   | 12   | 26,425 | 0        | 6,001  | 47823000 | 6   | 1015500  | 284770   |
| 46,5 | 46,5 | 63,544 | 0        | 263,9  | 5,14E+10 | 181 | 3,42E+08 | 1,85E+08 |
| 46,9 | 46,9 | 11,117 | 0        | 49,284 | 1,11E+11 | 70  | 3,71E+09 | 2,29E+09 |
| 18,5 | 18,5 | 54,305 | 0        | 10,937 | 2,61E+08 | 8   | 1329200  | 457450   |
| 25,8 | 25,8 | 67,877 | 0        | 41,025 | 2,24E+09 | 49  | 10391000 | 13131000 |
| 24,1 | 24,1 | 21,057 | 0        | 7,7377 | 9,21E+08 | 21  | 15632000 | 7729400  |
| 25,8 | 21   | 54,102 | 0        | 37,765 | 2,89E+09 | 64  | 18071000 | 5014800  |
| 6,9  | 6,9  | 98,336 | 0        | 57,528 | 1,7E+09  | 18  | 2439600  | 936830   |
| 32,7 | 32,7 | 16,545 | 0        | 83,634 | 1,09E+10 | 41  | 1,97E+08 | 29201000 |
| 17   | 17   | 16,849 | 0        | 3,6318 | 22655000 | 11  | 1840300  | 106640   |
| 25,4 | 25,4 | 27,85  | 0        | 49,181 | 1,03E+09 | 25  | 3581700  | 677050   |
| 59,3 | 49,2 | 27,774 | 0        | 215,13 | 2,23E+10 | 164 | 1,68E+08 | 80143000 |
| 41,9 | 41,9 | 11,74  | 0        | 13,605 | 5,67E+09 | 49  | 1,68E+08 | 58536000 |
| 4,1  | 4,1  | 138,91 | 0        | 11,174 | 99376000 | 11  | 709760   | 0        |
| 39,6 | 39,6 | 61,68  | 0        | 48,744 | 7,68E+09 | 132 | 35864000 | 11411000 |
| 4,9  | 4,9  | 53,119 | 0,007813 | 1,5315 | 1,76E+10 | 10  | 87305000 | 1,11E+08 |
| 21,6 | 21,6 | 129,99 | 0        | 141,34 | 4,38E+09 | 75  | 12295000 | 1243100  |
| 8,7  | 8,7  | 314,77 | 0        | 58,895 | 2,49E+09 | 80  | 3768900  | 1025300  |
| 21,5 | 21,5 | 226,53 | 0        | 277,72 | 6,5E+09  | 134 | 8367300  | 11191000 |
| 9,6  | 4,5  | 42,1   | 0        | 23,912 | 3,13E+08 | 26  | 2549200  | 869580   |
| 52,9 | 52,9 | 21,086 | 0        | 46,253 | 1,65E+09 | 55  | 15973000 | 17529000 |
| 6,7  | 6,7  | 135,51 | 0        | 79,196 | 2,89E+09 | 58  | 9983300  | 823220   |
| 20,7 | 20,7 | 36,426 | 0        | 23,244 | 7,43E+08 | 26  | 11018000 | 8268400  |
| 8,3  | 8,3  | 107,54 | 0        | 9,187  | 50587000 | 16  | 75691    | 163590   |
| 9,6  | 9,6  | 29,295 | 0        | 13,229 | 36130000 | 13  | 194420   | 82660    |
| 25,7 | 25,7 | 19,365 | 0        | 17,92  | 1,25E+09 | 12  | 0        | 0        |
| 4,8  | 4,8  | 273,42 | 0        | 11,931 | 2,09E+08 | 14  | 370200   | 158520   |
| 20,5 | 20,5 | 46,943 | 0        | 62,298 | 1,45E+09 | 20  | 8382800  | 14420    |
| 24,1 | 24,1 | 23,115 | 0        | 7,4712 | 6,13E+08 | 21  | 2225700  | 934220   |
| 15,9 | 15,9 | 67,404 | 0        | 49,821 | 2,18E+09 | 33  | 1943300  | 9855400  |
| 36,3 | 36,3 | 21,517 | 0        | 13,334 | 80023000 | 20  | 383350   | 290690   |
| 21   | 21   | 36,923 | 0        | 31,222 | 1,28E+09 | 33  | 9219400  | 3546100  |
| 9,7  | 9,7  | 51,853 | 0        | 5,2514 | 3,99E+08 | 5   | 9752800  | 3496400  |
| 12,4 | 12,4 | 17,444 | 0        | 51,051 | 4,71E+09 | 38  | 3,59E+08 | 28579000 |
| 29   | 29   | 54,739 | 0        | 63,493 | 2,43E+09 | 78  | 5752400  | 150420   |
| 13,2 | 13,2 | 71,065 | 0        | 7,7924 | 36665000 | 13  | 55056    | 100110   |
| 25,8 | 25,8 | 20,7   | 0        | 11,647 | 2,9E+08  | 17  | 7189200  | 2780300  |
| 3    | 3    | 195,98 | 0        | 5,6753 | 24215000 | 19  | 14529    | 2561,9   |
| 4,5  | 4,5  | 73,786 | 0        | 5,2505 | 1,18E+09 | 11  | 8541600  | 2047500  |
| 21,8 | 21,8 | 17,963 | 0        | 22,148 | 32376000 | 13  | 358710   | 233820   |
| 52,6 | 52,6 | 22,871 | 0        | 233,96 | 6,11E+09 | 70  | 47126000 | 43673000 |
| 27,7 | 27,7 | 16,645 | 0        | 6,3143 | 3,04E+08 | 10  | 933470   | 744580   |
| 43,7 | 43,7 | 13,714 | 0        | 140,96 | 2,01E+11 | 100 | 2,73E+09 | 7,9E+08  |
| 60,3 | 60,3 | 16,584 | 0        | 157,16 | 5,94E+09 | 75  | 1,54E+08 | 91582000 |
| 40,5 | 36,8 | 28,302 | 0        | 93,449 | 9,49E+08 | 45  | 4728000  | 1208100  |
| 49   | 49   | 29,174 | 0        | 81,485 | 2,29E+09 | 60  | 23407000 | 7546000  |
| 70,5 | 70,5 | 5,0526 | 0        | 70,109 | 1,73E+09 | 26  | 2,51E+08 | 25921000 |

|      |      |        |   |        |          |     |          |          |
|------|------|--------|---|--------|----------|-----|----------|----------|
| 38,8 | 38,8 | 11,314 | 0 | 44,884 | 1,23E+10 | 45  | 5,87E+08 | 2,47E+08 |
| 53,9 | 53,9 | 18,012 | 0 | 26,594 | 1,78E+08 | 42  | 989130   | 664610   |
| 41,7 | 41,7 | 11,951 | 0 | 14,532 | 1,37E+09 | 28  | 6076500  | 18143000 |
| 49,4 | 45,3 | 27,745 | 0 | 106,42 | 1,49E+10 | 87  | 74083000 | 51614000 |
| 61,6 | 5,1  | 37,348 | 0 | 122,74 | 1,67E+10 | 148 | 95256000 | 42202000 |
| 50   | 50   | 5,0256 | 0 | 14,666 | 4,96E+09 | 9   | 3,79E+08 | 62006000 |
| 17,1 | 17,1 | 55,394 | 0 | 28,686 | 3,58E+09 | 38  | 14707000 | 10814000 |
| 30,1 | 30,1 | 133,8  | 0 | 279,35 | 2,58E+10 | 168 | 73337000 | 29399000 |
| 31,3 | 31,3 | 22,588 | 0 | 13,402 | 44157000 | 17  | 369740   | 405650   |
| 16   | 16   | 40,368 | 0 | 40,17  | 7,29E+08 | 18  | 1903000  | 277100   |
| 5,7  | 5,7  | 126,51 | 0 | 24,245 | 7,95E+08 | 20  | 2787600  | 188930   |
| 21,7 | 21,7 | 38,006 | 0 | 39,377 | 3,04E+09 | 49  | 23799000 | 7785700  |
| 46,6 | 13,2 | 19,202 | 0 | 84,558 | 3,47E+09 | 35  | 37246000 | 61871000 |
| 5,5  | 5,5  | 70,169 | 0 | 9,1631 | 8,52E+08 | 16  | 1516000  | 725840   |
| 14,1 | 14,1 | 295,22 | 0 | 323,31 | 7,67E+09 | 103 | 6780300  | 10068000 |
| 15,5 | 15,5 | 79,398 | 0 | 10,877 | 3,16E+08 | 11  | 2991600  | 274270   |
| 52,5 | 50,8 | 53,879 | 0 | 323,31 | 3,09E+10 | 218 | 1,29E+08 | 17027000 |
| 34,2 | 34,2 | 81,979 | 0 | 323,31 | 2,81E+10 | 245 | 1,37E+08 | 43015000 |
| 39,2 | 35,7 | 22,11  | 0 | 48,825 | 8,22E+09 | 59  | 46930000 | 57910000 |
| 7,2  | 7,2  | 96,792 | 0 | 74,085 | 1,2E+09  | 34  | 3371300  | 3494100  |
| 11,9 | 11,9 | 101,8  | 0 | 46,993 | 2,02E+09 | 27  | 4384600  | 2244400  |
| 49,7 | 49,7 | 65,33  | 0 | 323,31 | 1,23E+11 | 243 | 2E+08    | 59886000 |
| 14,8 | 14,8 | 60,793 | 0 | 53,174 | 9,6E+08  | 35  | 5597000  | 25649    |
| 35,6 | 35,6 | 46,231 | 0 | 107,1  | 4,97E+09 | 88  | 27149000 | 12938000 |
| 58,4 | 58,4 | 34,985 | 0 | 175,99 | 3,66E+10 | 166 | 1,12E+08 | 53009000 |
| 15,3 | 15,3 | 111,87 | 0 | 40,253 | 1,86E+09 | 33  | 9239900  | 5783600  |
| 28,2 | 28,2 | 43,078 | 0 | 21,772 | 1,42E+09 | 34  | 22682000 | 318850   |
| 18,4 | 18,4 | 84,364 | 0 | 71,859 | 1,91E+09 | 53  | 989460   | 1780200  |
| 12,7 | 12,7 | 36,728 | 0 | 2,525  | 3,23E+08 | 7   | 0        | 0        |
| 11,3 | 11,3 | 69,323 | 0 | 14,499 | 1,31E+09 | 16  | 10780000 | 1747700  |
| 56,1 | 56,1 | 129,57 | 0 | 323,31 | 2,13E+10 | 348 | 41793000 | 53764000 |
| 61,7 | 61,7 | 130,97 | 0 | 323,31 | 3,73E+11 | 747 | 9,16E+08 | 3,04E+08 |
| 17,7 | 17,7 | 97,539 | 0 | 105,58 | 1,73E+09 | 58  | 3312800  | 1348600  |
| 22,3 | 22,3 | 59,589 | 0 | 24,957 | 9,8E+08  | 49  | 6123200  | 2927000  |
| 34,6 | 34,6 | 26,264 | 0 | 210,73 | 6,09E+10 | 166 | 1,24E+09 | 3,29E+08 |
| 11,9 | 11,5 | 189,24 | 0 | 122,13 | 4,78E+09 | 82  | 6085800  | 1337000  |
| 20,4 | 20,4 | 47,837 | 0 | 23,371 | 5,8E+08  | 25  | 6615500  | 2035400  |
| 3,9  | 3,3  | 512,6  | 0 | 16,414 | 2,28E+08 | 24  | 145970   | 34076    |
| 13,3 | 13,3 | 26,697 | 0 | 4,324  | 8,07E+08 | 15  | 12477000 | 4058600  |
| 21,4 | 21,4 | 83,073 | 0 | 78,704 | 1,26E+09 | 62  | 440140   | 182870   |
| 41,3 | 41,3 | 74,68  | 0 | 323,31 | 3,07E+10 | 260 | 2,4E+08  | 1,12E+08 |
| 56,4 | 56,4 | 29,13  | 0 | 309,45 | 4,96E+10 | 175 | 3,44E+08 | 2,37E+08 |
| 47,2 | 47,2 | 60,673 | 0 | 221,31 | 9,75E+09 | 204 | 33085000 | 11616000 |
| 20,1 | 20,1 | 52,276 | 0 | 16,912 | 4,77E+08 | 33  | 3097400  | 2109200  |
| 29,9 | 29,9 | 40,876 | 0 | 39,226 | 6,46E+09 | 63  | 26180000 | 6088600  |
| 45,6 | 45,6 | 190,46 | 0 | 323,31 | 5,7E+10  | 534 | 63105000 | 70025000 |
| 13,7 | 13,7 | 110,11 | 0 | 57,344 | 1,24E+09 | 31  | 4179400  | 1404600  |
| 23,3 | 9,3  | 30,492 | 0 | 9,3771 | 37428000 | 6   | 520210   | 371950   |
| 8,4  | 8,4  | 37,106 | 0 | 3,1167 | 4,69E+08 | 15  | 1428400  | 0        |
| 10,7 | 10,7 | 43,235 | 0 | 7,9497 | 7,18E+08 | 19  | 0        | 0        |

|      |      |        |   |        |          |      |          |          |
|------|------|--------|---|--------|----------|------|----------|----------|
| 17,4 | 17,4 | 250,53 | 0 | 117,47 | 4,52E+09 | 135  | 9374900  | 102170   |
| 17,9 | 17,9 | 159,69 | 0 | 141,77 | 1,87E+09 | 82   | 3631400  | 4628600  |
| 11,5 | 11,5 | 57,929 | 0 | 5,5525 | 49544000 | 11   | 61890    | 0        |
| 21,5 | 21,5 | 54,498 | 0 | 43,512 | 2,24E+09 | 50   | 6513900  | 610540   |
| 15,9 | 15,9 | 130,93 | 0 | 106,13 | 6,76E+09 | 78   | 13404000 | 2328500  |
| 20,8 | 20,8 | 100,16 | 0 | 110,82 | 1,7E+09  | 35   | 13206000 | 3207300  |
| 42,2 | 42,2 | 74,285 | 0 | 323,31 | 3,73E+10 | 210  | 2,28E+08 | 45913000 |
| 13,7 | 13,7 | 71,819 | 0 | 21,691 | 49831000 | 18   | 57178    | 43985    |
| 25,6 | 25,6 | 24,68  | 0 | 25,144 | 4E+08    | 41   | 2347200  | 5327500  |
| 18,2 | 18,2 | 165,27 | 0 | 139,2  | 2,04E+09 | 84   | 6033500  | 3353800  |
| 29,4 | 29,4 | 51,286 | 0 | 275,36 | 6,29E+09 | 60   | 36163000 | 13834000 |
| 7,9  | 7,9  | 144,37 | 0 | 15,203 | 91054000 | 25   | 40472    | 2135,8   |
| 14,8 | 14,8 | 134,55 | 0 | 37,994 | 3,02E+09 | 58   | 6407300  | 1396500  |
| 12,5 | 12,5 | 16,003 | 0 | 10,168 | 6,84E+08 | 16   | 13945000 | 14251000 |
| 26,5 | 26,5 | 19,891 | 0 | 1,9773 | 6,06E+08 | 7    | 14385000 | 10464000 |
| 16,8 | 16,8 | 47,071 | 0 | 40,784 | 6,02E+08 | 30   | 15576000 | 1127500  |
| 21,2 | 21,2 | 324,57 | 0 | 114,5  | 6,01E+09 | 170  | 7573900  | 8479800  |
| 28,4 | 28,4 | 85,206 | 0 | 183,26 | 6,39E+09 | 115  | 11127000 | 2828300  |
| 34,1 | 34,1 | 13,941 | 0 | 7,3546 | 98880000 | 17   | 457540   | 529600   |
| 37,1 | 37,1 | 23,031 | 0 | 11,535 | 3,44E+09 | 24   | 4439100  | 2042900  |
| 36   | 36   | 48,807 | 0 | 65,254 | 3,1E+09  | 74   | 7718800  | 1785000  |
| 74,2 | 74,2 | 10,438 | 0 | 14,13  | 2,16E+09 | 22   | 72547000 | 26657000 |
| 10,1 | 10,1 | 81,975 | 0 | 48,042 | 7,82E+08 | 23   | 2081800  | 55795    |
| 5,5  | 5,5  | 281,52 | 0 | 15,522 | 3,09E+08 | 20   | 131140   | 794250   |
| 27,5 | 27,5 | 83,432 | 0 | 92,302 | 2,46E+09 | 69   | 8607800  | 13751000 |
| 9,7  | 9,7  | 98,555 | 0 | 24,87  | 2,07E+09 | 43   | 859650   | 4680400  |
| 43,1 | 2,6  | 38,39  | 0 | 226,3  | 7,48E+09 | 127  | 29603000 | 7991300  |
| 15,2 | 15,2 | 33,868 | 0 | 70,212 | 3,58E+09 | 24   | 81727000 | 33833000 |
| 17,4 | 17,4 | 35,634 | 0 | 13,115 | 2,33E+08 | 21   | 4258900  | 6014000  |
| 7,1  | 7,1  | 142,34 | 0 | 72,862 | 4,15E+09 | 33   | 11716000 | 2358300  |
| 25,6 | 25,6 | 26,671 | 0 | 139,34 | 3,39E+09 | 29   | 21554000 | 25555000 |
| 39,7 | 39,7 | 24,341 | 0 | 52,488 | 1,61E+09 | 32   | 28141000 | 33562000 |
| 16,5 | 16,5 | 81,196 | 0 | 89,655 | 1,64E+09 | 33   | 20461000 | 2345900  |
| 11,6 | 11,6 | 94,75  | 0 | 31,508 | 7,01E+08 | 23   | 688780   | 5539500  |
| 17,9 | 17,9 | 32,227 | 0 | 5,4462 | 2,75E+09 | 22   | 10291000 | 41498000 |
| 62,5 | 0    | 259,21 | 0 | 323,31 | 2,36E+12 | 2794 | 2,17E+09 | 2,96E+09 |
| 34,8 | 34,8 | 24,093 | 0 | 11,912 | 6,03E+08 | 32   | 722330   | 1656600  |
| 43,7 | 0,5  | 240,91 | 0 | 323,31 | 1,33E+10 | 363  | 12119000 | 10214000 |
| 36,7 | 16,3 | 464,01 | 0 | 323,31 | 9,26E+10 | 944  | 64082000 | 28890000 |
| 20,3 | 11,6 | 14,813 | 0 | 41,996 | 6,83E+09 | 16   | 22583000 | 0        |
| 26,5 | 0    | 40,853 | 0 | 43,39  | 2,7E+09  | 34   | 0        | 0        |
| 56   | 0    | 31,468 | 0 | 94,489 | 2,75E+09 | 51   | 10619000 | 40222    |

omo sapiens OX=9606 GN=HLA-A PE=3 SV=1;tr|A0A0U5PUM0|A0A0U5PUM0\_HUMAN MHC class I a

|      |     |        |   |        |          |     |          |          |
|------|-----|--------|---|--------|----------|-----|----------|----------|
| 6,1  | 0   | 21,216 | 0 | 6,2742 | 8,31E+08 | 8   | 3560700  | 839600   |
| 1,8  | 0   | 239,62 | 0 | 3,6111 | 1,24E+08 | 16  | 129590   | 219870   |
| 36,4 | 35  | 76,613 | 0 | 102,9  | 6,63E+09 | 108 | 572730   | 319880   |
| 4,8  | 1,2 | 99,978 | 0 | 22,836 | 6,46E+09 | 38  | 29561000 | 133310   |
| 50   | 9,6 | 17,471 | 0 | 26,583 | 4,16E+09 | 55  | 57192000 | 20338000 |
| 19,1 | 0   | 61,94  | 0 | 17,079 | 2,9E+09  | 37  | 21728000 | 24443000 |
| 4,7  | 1,9 | 74,831 | 0 | 323,31 | 6,66E+10 | 267 | 2,63E+08 | 1,09E+08 |

|      |      |        |   |        |          |     |          |          |
|------|------|--------|---|--------|----------|-----|----------|----------|
| 36,6 | 36,6 | 71,553 | 0 | 77,483 | 8E+09    | 128 | 71519000 | 22670000 |
| 20   | 20   | 7,99   | 0 | 16,266 | 6,66E+08 | 6   | 29338000 | 18754000 |
| 7,5  | 7,5  | 14,691 | 0 | 25,049 | 1,19E+10 | 30  | 2,77E+08 | 2,32E+08 |
| 64,3 | 64,3 | 46,924 | 0 | 323,31 | 7,22E+10 | 229 | 2,83E+08 | 20022000 |
| 7,7  | 0    | 38,865 | 0 | 26,998 | 1,99E+09 | 17  | 0        | 0        |
| 27   | 27   | 12,759 | 0 | 5,4929 | 1,72E+09 | 8   | 9018300  | 39553000 |
| 41   | 41   | 38,069 | 0 | 64,295 | 2,72E+09 | 54  | 13368000 | 2663600  |

| iBAQ 1-5 | iBAQ 2-1 | iBAQ 2-2 | iBAQ 2-3 | iBAQ 2-4 | iBAQ 3-1 | iBAQ 3-2 | iBAQ 3-3 | iBAQ 3-4 |
|----------|----------|----------|----------|----------|----------|----------|----------|----------|
| 1,82E+08 | 1,05E+08 | 1,32E+08 | 91384000 | 1,47E+08 | 60927000 | 48299000 | 59657000 | 1,09E+08 |
| 2,19E+08 | 40525000 | 34509000 | 46834000 | 41358000 | 6615700  | 3411300  | 7267300  | 1,24E+08 |
| 97959000 | 7555900  | 4620300  | 20505000 | 16035000 | 28207    | 21636    | 24610    | 71577000 |
| 27575000 | 210850   | 461720   | 8027,8   | 43448    | 0        | 0        | 0        | 1083900  |
| 31740000 | 916690   | 25936    | 172870   | 519910   | 258390   | 33832    | 1652600  | 318810   |
| 4,03E+08 | 65898000 | 50950000 | 1,09E+08 | 1,12E+08 | 11830000 | 4731800  | 3983700  | 5,01E+08 |
| 35007000 | 4229200  | 177750   | 23580    | 3145600  | 31924    | 4447,6   | 2518700  | 164010   |
| 49636000 | 4218700  | 3013200  | 5472900  | 3077900  | 103020   | 989190   | 26555    | 20837000 |
| 114900   | 111040   | 83312    | 21802000 | 25206000 | 29277000 | 29182000 | 20714000 | 88344    |
| 78521    | 64080    | 139190   | 143620   | 124760   | 89228    | 164760   | 177490   | 56133    |
| 29242000 | 39609000 | 32490000 | 17230000 | 26972000 | 24950000 | 20929000 | 14283000 | 8368400  |
| 0        | 230370   | 126850   | 164700   | 135830   | 159120   | 179900   | 151870   | 334010   |
| 52278000 | 1,62E+08 | 1,32E+08 | 81273000 | 82041000 | 2,05E+08 | 1,59E+08 | 1,5E+08  | 1,14E+08 |
| 15244000 | 0        | 7053000  | 710930   | 3327300  | 584480   | 3818100  | 535120   | 639020   |
| 2E+08    | 2,18E+08 | 1,91E+08 | 2,59E+08 | 2,69E+08 | 1,77E+08 | 1,89E+08 | 1,61E+08 | 1,68E+08 |
| 23838    | 646900   | 239000   | 8401,8   | 9439,1   | 223790   | 174350   | 122860   | 21909    |
| 402960   | 2153600  | 957970   | 499750   | 324580   | 135480   | 397720   | 275690   | 192390   |
| 13930000 | 36281000 | 28205000 | 20357000 | 22626000 | 51405000 | 40424000 | 34476000 | 16936000 |
| 7473700  | 6273400  | 6123300  | 4653000  | 5297700  | 7930100  | 3129100  | 5662800  | 5957500  |
| 13357000 | 10353000 | 4761500  | 3139500  | 1882700  | 4061700  | 2044300  | 3612200  | 8934000  |
| 0        | 1967000  | 1524400  | 0        | 4279,3   | 1223100  | 902590   | 1676000  | 13886    |
| 27551000 | 2,16E+08 | 1,35E+08 | 1,74E+08 | 1,39E+08 | 3,79E+08 | 3,46E+08 | 3,5E+08  | 1,36E+08 |
| 2033800  | 3624300  | 2735800  | 2599600  | 2297300  | 400020   | 8990700  | 4583100  | 6714600  |
| 39423000 | 14621000 | 14565000 | 7251600  | 14615000 | 0        | 9435800  | 0        | 12914000 |
| 639750   | 6368500  | 5430700  | 1430400  | 2615000  | 11815000 | 9264400  | 10239000 | 2180000  |
| 2381400  | 3688500  | 1138000  | 2197900  | 677430   | 1350200  | 391630   | 741190   | 1984800  |
| 18283000 | 4233900  | 650300   | 226370   | 3595400  | 58313    | 0        | 0        | 10344000 |
| 996690   | 600200   | 469310   | 588320   | 22679    | 631890   | 675290   | 767890   | 314280   |
| 10513000 | 204400   | 19545000 | 13218000 | 7775800  | 34127000 | 30843000 | 47751000 | 39640000 |
| 12031000 | 15576000 | 17121000 | 28386000 | 28861000 | 72395000 | 66779000 | 53269000 | 926910   |
| 1,05E+08 | 2,35E+08 | 2,02E+08 | 74989000 | 1,19E+08 | 2,89E+08 | 1,86E+08 | 1,94E+08 | 2,01E+08 |
| 287240   | 791970   | 1207000  | 0        | 37384    | 9170000  | 7950400  | 5776700  | 1162200  |
| 2702800  | 3771500  | 4837300  | 6209300  | 4407500  | 76335    | 521850   | 105240   | 4324600  |
| 29487000 | 44635000 | 35712000 | 14131000 | 16104000 | 63096000 | 31838000 | 35204000 | 41604000 |
| 50316000 | 49505000 | 39921000 | 33384000 | 39247000 | 45506000 | 45180000 | 35977000 | 51711000 |
| 1059000  | 832450   | 469850   | 1629300  | 1511600  | 147640   | 128010   | 32707    | 1121900  |
| 528490   | 1602400  | 1269100  | 1637300  | 1446200  | 1718100  | 1045700  | 1251000  | 1190500  |
| 0        | 9343,1   | 141610   | 9715,8   | 686790   | 5932600  | 4764000  | 7840100  | 24739    |
| 403000   | 2500100  | 1334000  | 1378500  | 1308900  | 3850300  | 1884600  | 2576400  | 658530   |
| 1,55E+08 | 1,92E+08 | 2,04E+08 | 99544000 | 77229000 | 4,11E+08 | 2,89E+08 | 2,88E+08 | 2,03E+08 |
| 1,11E+08 | 1,08E+08 | 1,19E+08 | 1,06E+08 | 82367000 | 81481000 | 99246000 | 1,37E+08 | 79296000 |
| 14854000 | 8103400  | 6415800  | 4846500  | 8272300  | 4474100  | 4081400  | 2620200  | 9955200  |
| 34340000 | 3,36E+09 | 4,73E+09 | 1,05E+08 | 3,91E+08 | 2,37E+09 | 3,45E+09 | 2,13E+09 | 54176000 |
| 3699900  | 167900   | 187620   | 730820   | 669660   | 783590   | 644580   | 639950   | 2283300  |
| 1324400  | 2133900  | 3518100  | 1255100  | 137430   | 0        | 2258900  | 0        | 97747    |
| 2116500  | 16270000 | 5176900  | 6898000  | 6057200  | 18663000 | 10432000 | 25804000 | 3824200  |
| 3519900  | 7383300  | 3734000  | 3580000  | 3516900  | 3812000  | 4163400  | 3820100  | 3919300  |
| 38363000 | 96996000 | 89981000 | 48083000 | 39776000 | 1,26E+08 | 98471000 | 67365000 | 36460000 |

|          |          |          |          |          |          |          |          |          |
|----------|----------|----------|----------|----------|----------|----------|----------|----------|
| 215050   | 82966    | 118100   | 209690   | 252820   | 97615    | 131470   | 104580   | 68452    |
| 0        | 384920   | 256860   | 0        | 0        | 219380   | 246270   | 203040   | 0        |
| 1,64E+10 | 2,1E+10  | 2,18E+10 | 1,47E+10 | 1,69E+10 | 1,81E+10 | 1,47E+10 | 1,73E+10 | 2,28E+10 |
| 11786000 | 2062800  | 20092000 | 21291000 | 937280   | 15160000 | 13408000 | 15271000 | 30671000 |
| 1,59E+08 | 3,83E+08 | 5,26E+08 | 1,52E+08 | 1,34E+08 | 1,12E+08 | 1,32E+08 | 40595000 | 65369000 |
| 13949000 | 36794000 | 31254000 | 25819000 | 20322000 | 22993000 | 19090000 | 21822000 | 13156000 |
| 2872900  | 919430   | 412820   | 2399700  | 3166900  | 107420   | 157110   | 117220   | 291650   |
| 498610   | 5557800  | 3948700  | 1168700  | 1162100  | 4346800  | 3264600  | 5956900  | 859320   |
| 15815000 | 13400000 | 5847300  | 1085600  | 1082200  | 10154000 | 8089200  | 11397000 | 4013100  |
| 93590000 | 5586300  | 1520900  | 1372100  | 2987600  | 199960   | 0        | 2127200  | 5784700  |
| 54993000 | 18533000 | 9151300  | 10682000 | 10186000 | 15632000 | 14026000 | 43835000 | 1177000  |
| 3650900  | 35490000 | 20408000 | 8419600  | 8554800  | 14660000 | 15677000 | 12225000 | 1850700  |
| 6,06E+08 | 1,01E+09 | 8,81E+08 | 4,96E+08 | 5,35E+08 | 9,67E+08 | 8,24E+08 | 7,77E+08 | 6,33E+08 |
| 36601000 | 12336000 | 12853000 | 1,1E+08  | 43006000 | 17690000 | 8951600  | 24023000 | 29304000 |
| 4899900  | 37985000 | 38978000 | 131790   | 148490   | 4619400  | 5197000  | 12166000 | 6786300  |
| 17827000 | 72562000 | 87642000 | 6827700  | 4905300  | 2,53E+08 | 1,85E+08 | 1,89E+08 | 56359000 |
| 72864    | 310110   | 507650   | 342760   | 145580   | 816210   | 661340   | 722970   | 1255800  |
| 4854700  | 4967600  | 1954400  | 1952600  | 3393500  | 5390100  | 525350   | 3756900  | 4089900  |
| 1397300  | 4730900  | 2081000  | 989720   | 460010   | 1671600  | 1966200  | 2068000  | 1717600  |
| 1931500  | 3552300  | 1911800  | 3709800  | 4191900  | 5640800  | 2131000  | 5751900  | 8249900  |
| 22127000 | 6350800  | 7001900  | 14533000 | 15337000 | 22374000 | 11025000 | 6624900  | 22859000 |
| 4,36E+08 | 9,68E+08 | 7,57E+08 | 1,3E+09  | 9,24E+08 | 7,15E+08 | 4,39E+08 | 5,81E+08 | 1,12E+09 |
| 71416000 | 72631000 | 54177000 | 24272000 | 10427000 | 54317000 | 27292000 | 42971000 | 5229700  |
| 1024000  | 995490   | 393310   | 1554500  | 256150   | 141220   | 213180   | 318400   | 994590   |
| 29321000 | 47318000 | 30098000 | 36169000 | 21226000 | 23021000 | 9606500  | 28188000 | 37924000 |
| 0        | 20937000 | 13857000 | 32459000 | 26807000 | 26709000 | 25082000 | 22270000 | 9153000  |
| 5355200  | 56101000 | 32330000 | 890400   | 2406500  | 85524000 | 33565000 | 50027000 | 3390700  |
| 47984000 | 33719000 | 11325000 | 13995000 | 28474000 | 15008000 | 19226000 | 12486000 | 23964000 |
| 14943000 | 36456000 | 27635000 | 24211000 | 18630000 | 26005000 | 13553000 | 15377000 | 56741000 |
| 9474200  | 4466100  | 4969200  | 4706900  | 4571000  | 4657000  | 4688800  | 3378700  | 5604800  |
| 13821000 | 68859000 | 48922000 | 29689000 | 32317000 | 35765000 | 31455000 | 26640000 | 44134000 |
| 34779000 | 64872000 | 41657000 | 19132000 | 85064000 | 49624000 | 42816000 | 45368000 | 59032000 |
| 9935300  | 14082000 | 4720400  | 11029000 | 7304500  | 7058600  | 7131500  | 5887300  | 6701100  |
| 47917000 | 1,37E+08 | 84217000 | 1,63E+08 | 1,09E+08 | 1,79E+08 | 1,55E+08 | 1,34E+08 | 1,26E+08 |
| 41287000 | 34238000 | 22387000 | 56231000 | 97100000 | 37127000 | 26358000 | 3075000  | 7745900  |
| 26884000 | 51580000 | 46058000 | 26581000 | 32880000 | 80598000 | 61567000 | 61938000 | 23160000 |
| 1,09E+09 | 8,96E+08 | 1,03E+09 | 1,09E+09 | 1,17E+09 | 1,39E+09 | 8,77E+08 | 1,22E+09 | 8,8E+08  |
| 3996500  | 10678000 | 7514000  | 7969000  | 7600600  | 8394300  | 6119500  | 4601800  | 11384000 |
| 30019000 | 65485000 | 89792000 | 52195000 | 55961000 | 1,92E+08 | 1,2E+08  | 1,97E+08 | 1E+08    |
| 2335900  | 1838500  | 1734200  | 4253600  | 4157300  | 3882100  | 3745000  | 2287600  | 2609700  |
| 1110300  | 6232000  | 874710   | 530190   | 583580   | 1026300  | 6464700  | 478740   | 1867200  |
| 0        | 2524300  | 485520   | 134320   | 215520   | 44103    | 153150   | 32416    | 0        |
| 17152000 | 23998000 | 13087000 | 14632000 | 14478000 | 7597800  | 4544800  | 5377200  | 18418000 |
| 2166900  | 2997500  | 333290   | 1959700  | 1475600  | 1963800  | 2219100  | 2752000  | 2278200  |
| 643540   | 15559000 | 11083000 | 4065100  | 2373300  | 13966000 | 67739000 | 6657100  | 4849400  |
| 5049200  | 48052000 | 69258000 | 42977000 | 22012000 | 1,67E+08 | 79332000 | 1,52E+08 | 6511000  |
| 99425000 | 1,95E+08 | 2,17E+08 | 1,1E+08  | 55882000 | 1,5E+08  | 84413000 | 2,42E+08 | 65920000 |
| 0        | 1918000  | 1511600  | 552490   | 640380   | 1071300  | 1375000  | 792110   | 150430   |
| 903880   | 1206500  | 353830   | 152650   | 428070   | 988020   | 1181700  | 299400   | 2060300  |
| 224780   | 984650   | 100190   | 668190   | 437400   | 996490   | 2071600  | 1760900  | 32627    |

|          |          |          |          |          |          |          |          |          |
|----------|----------|----------|----------|----------|----------|----------|----------|----------|
| 0        | 539650   | 165920   | 312850   | 164500   | 28977    | 82198    | 1649000  | 56252    |
| 49852000 | 55434000 | 37191000 | 16565000 | 16506000 | 30389000 | 31779000 | 19848000 | 22718000 |
| 1886200  | 3050900  | 3429400  | 2659200  | 2091000  | 4235900  | 3263200  | 4408800  | 3995900  |
| 30113000 | 46096000 | 44319000 | 2552800  | 34726000 | 21436000 | 687200   | 1394500  | 5528800  |
| 15875000 | 59735000 | 43419000 | 42222000 | 43375000 | 76475000 | 68665000 | 65412000 | 1,03E+08 |
| 24177000 | 48974000 | 51668000 | 42281000 | 45663000 | 74211000 | 75251000 | 77066000 | 39901000 |
| 3131100  | 14883000 | 17426000 | 16066000 | 11594000 | 36215000 | 7593400  | 19921000 | 17679000 |
| 398550   | 1362900  | 584540   | 2554100  | 1024400  | 5081000  | 9786300  | 6024300  | 2069500  |
| 47336000 | 43580000 | 30528000 | 31958000 | 20996000 | 25448000 | 27765000 | 10688000 | 67320000 |
| 4628100  | 4498000  | 7374400  | 3586200  | 5312300  | 5616300  | 5550400  | 5534600  | 7339800  |
| 4885900  | 23180000 | 4513400  | 24004000 | 17549000 | 64303000 | 44772000 | 33758000 | 5754600  |
| 2615000  | 991100   | 408750   | 359690   | 243830   | 345670   | 175420   | 790890   | 1808100  |
| 3975000  | 8148100  | 3356300  | 1891400  | 3577800  | 3188300  | 7263400  | 6039700  | 9536400  |
| 5614500  | 4036800  | 13823000 | 13295000 | 1016900  | 31728000 | 25435000 | 4436300  | 4996400  |
| 509920   | 1673100  | 350350   | 253220   | 301970   | 27477    | 10296    | 0        | 0        |
| 47341000 | 59775000 | 20268000 | 45713000 | 16222000 | 54921000 | 56264000 | 44206000 | 31483000 |
| 0        | 26785000 | 8278600  | 0        | 0        | 20994000 | 35778000 | 25478000 | 0        |
| 564620   | 2742100  | 951150   | 1184800  | 1042700  | 14862000 | 8506800  | 7509700  | 2337300  |
| 64855    | 1795100  | 4334600  | 229810   | 107300   | 3928000  | 4247600  | 2324300  | 432860   |
| 2354200  | 6287000  | 8251300  | 2771200  | 2881600  | 4306200  | 4876000  | 4217800  | 3785900  |
| 15350000 | 23824000 | 22523000 | 15958000 | 0        | 0        | 26174000 | 22580000 | 21862000 |
| 0        | 235270   | 204010   | 117010   | 93420    | 221170   | 313830   | 216280   | 86530    |
| 15951    | 699830   | 50694    | 543750   | 221810   | 57689    | 31837    | 837520   | 2973200  |
| 19608000 | 24480000 | 21652000 | 2876400  | 3734300  | 31635000 | 9583700  | 15300000 | 33276000 |
| 232680   | 886330   | 483090   | 178550   | 1638200  | 11482000 | 1409300  | 9706600  | 1869100  |
| 64845000 | 55280000 | 29663000 | 58580000 | 69350000 | 54209000 | 68709000 | 40992000 | 68165000 |
| 5683200  | 6872300  | 1801300  | 458650   | 1399800  | 1234300  | 1101400  | 2277800  | 2742400  |
| 19174000 | 32335000 | 18562000 | 25684000 | 21937000 | 20368000 | 22750000 | 20584000 | 17590000 |
| 245000   | 440740   | 95521    | 10158    | 68303    | 26037    | 11112    | 362620   | 1138400  |
| 5628800  | 2703100  | 2577600  | 5474900  | 3243100  | 9301700  | 2998400  | 5052100  | 2902200  |
| 1,97E+08 | 2,47E+08 | 1,82E+08 | 2,31E+08 | 2,42E+08 | 5,8E+08  | 4,18E+08 | 3,61E+08 | 2,5E+08  |
| 1063800  | 9016000  | 7426100  | 3955500  | 7096900  | 2074800  | 517490   | 0        | 362010   |
| 434000   | 12303000 | 23079000 | 3843400  | 4492300  | 11940000 | 431740   | 3274900  | 4103200  |
| 1250000  | 726740   | 334760   | 1807200  | 721410   | 794420   | 429520   | 106020   | 1253900  |
| 29674000 | 80375000 | 1,16E+08 | 42079000 | 81811000 | 1,9E+08  | 2,94E+08 | 3,28E+08 | 1,43E+08 |
| 13047    | 422500   | 51700    | 4837,5   | 34500    | 36906000 | 20182000 | 26490000 | 201000   |
| 3614400  | 7568800  | 5390300  | 2761500  | 3545000  | 4585800  | 9450600  | 5826200  | 9483400  |
| 2465300  | 6076100  | 3567000  | 955480   | 778580   | 1794700  | 2394200  | 1778600  | 1349800  |
| 4611800  | 25697000 | 7099600  | 1403200  | 30219000 | 26981000 | 11932000 | 3735300  | 31170000 |
| 1,33E+08 | 44361000 | 89486000 | 56402000 | 46069000 | 37914000 | 5106200  | 25516000 | 2,4E+08  |
| 2865700  | 6671000  | 973290   | 1618900  | 6551600  | 44378000 | 92984000 | 83365000 | 7422900  |
| 4528100  | 11167000 | 17090000 | 19611000 | 10555000 | 45536000 | 30795000 | 35279000 | 28766000 |
| 1863300  | 2148400  | 11368000 | 463350   | 294690   | 859240   | 207440   | 627230   | 552630   |
| 54653000 | 97647000 | 59853000 | 45166000 | 48324000 | 72823000 | 66026000 | 51302000 | 1E+08    |
| 711780   | 14984000 | 2980100  | 8875500  | 9888600  | 7429900  | 5712700  | 6512200  | 3582000  |
| 131200   | 26045    | 20893    | 155490   | 137210   | 92771    | 97682    | 80599    | 283420   |
| 114580   | 511800   | 515550   | 841040   | 596960   | 1513900  | 1613200  | 382330   | 370260   |
| 4186700  | 8284600  | 3395700  | 430240   | 2567300  | 288600   | 176800   | 0        | 955330   |
| 134240   | 84157    | 384880   | 267430   | 167620   | 78571    | 40390    | 1410100  | 3825100  |
| 0        | 2944800  | 2909900  | 600990   | 2468800  | 984840   | 2354600  | 0        | 1706800  |



|          |          |          |          |          |          |          |          |          |
|----------|----------|----------|----------|----------|----------|----------|----------|----------|
| 850390   | 2653000  | 4397100  | 12391000 | 5459600  | 13679000 | 8532700  | 5094100  | 1362200  |
| 89312000 | 1,75E+08 | 1,39E+08 | 1,23E+08 | 1,2E+08  | 1,17E+08 | 97577000 | 1,15E+08 | 2,06E+08 |
| 17609    | 54107    | 1699900  | 897600   | 19699    | 6072,3   | 0        | 0        | 0        |
| 865890   | 939080   | 67069    | 33608    | 92605    | 237110   | 204290   | 169660   | 437960   |
| 1,04E+08 | 2,04E+08 | 2,28E+08 | 2,67E+08 | 1,77E+08 | 2,61E+08 | 1,31E+08 | 2,83E+08 | 1,52E+08 |
| 1,64E+09 | 3,16E+09 | 1,83E+09 | 3,26E+09 | 1,94E+09 | 3,29E+09 | 1,38E+09 | 2,63E+09 | 2,7E+09  |
| 585070   | 1175000  | 925850   | 603810   | 67625    | 3331200  | 2385300  | 2152100  | 54472    |
| 7034500  | 12217000 | 2674500  | 8963800  | 9819600  | 5250600  | 2834400  | 8120600  | 8996500  |
| 7730500  | 9172200  | 5510200  | 7147000  | 5013000  | 6152000  | 5342100  | 7172500  | 15451000 |
| 5143900  | 12384000 | 5910400  | 6025400  | 5157600  | 13138000 | 9538500  | 8454600  | 14261000 |
| 4478500  | 3657700  | 3046000  | 457790   | 1572500  | 6894300  | 14098000 | 7553800  | 3517800  |
| 50739000 | 2,22E+08 | 1,68E+08 | 52830000 | 38762000 | 2,59E+08 | 2,28E+08 | 1,97E+08 | 1,12E+08 |
| 549670   | 239930   | 730550   | 380080   | 375020   | 165840   | 173360   | 187520   | 914720   |
| 6440000  | 2250300  | 8533100  | 17587000 | 12336000 | 2962000  | 14845000 | 2730300  | 1560900  |
| 1,01E+08 | 1,54E+08 | 1,76E+08 | 68020000 | 1,05E+08 | 1,41E+08 | 1,21E+08 | 1,93E+08 | 85416000 |
| 41910000 | 99454000 | 1,08E+08 | 90809000 | 1,01E+08 | 1,14E+08 | 1,28E+08 | 1,21E+08 | 1,04E+08 |
| 0        | 0        | 0        | 0        | 0        | 919880   | 91628    | 84405    | 69351    |
| 11069000 | 21667000 | 30476000 | 19059000 | 16835000 | 37319000 | 25814000 | 31706000 | 33210000 |
| 1,34E+08 | 2,39E+08 | 1,61E+08 | 71774000 | 45707000 | 84781000 | 39352000 | 80158000 | 46462000 |
| 1423900  | 19339000 | 18337000 | 16780000 | 23172000 | 911920   | 1128200  | 1135700  | 1642200  |
| 1112100  | 1382700  | 682400   | 2302300  | 2577100  | 1542200  | 3030300  | 876070   | 123680   |
| 2997300  | 6878200  | 5493100  | 7455200  | 8357000  | 2349300  | 2498300  | 3578300  | 3349100  |
| 419210   | 1406200  | 748630   | 5639800  | 955750   | 214840   | 430000   | 552740   | 456350   |
| 1609100  | 2429400  | 1953900  | 32063000 | 31407000 | 14608000 | 9713000  | 5981700  | 4378200  |
| 1948900  | 1929500  | 1741400  | 879280   | 1289500  | 8670700  | 8390800  | 7596200  | 6608100  |
| 3462600  | 4445400  | 3489800  | 3876100  | 5970400  | 2786800  | 1432100  | 116750   | 4681100  |
| 143140   | 149220   | 273720   | 18487    | 93938    | 9996,6   | 109620   | 10666    | 28236    |
| 90297    | 261310   | 239340   | 336910   | 229650   | 240560   | 306520   | 317480   | 109540   |
| 105440   | 34258000 | 9122300  | 0        | 0        | 31512000 | 25213000 | 40969000 | 14786000 |
| 101120   | 136900   | 106230   | 69655    | 69513    | 172580   | 36870    | 260470   | 190810   |
| 181910   | 1416100  | 3324200  | 3688600  | 3941100  | 18496000 | 4072000  | 10159000 | 0        |
| 1706300  | 1617500  | 1001600  | 1201400  | 122270   | 1171500  | 1065600  | 9231700  | 30839000 |
| 15978    | 10850000 | 7294600  | 3097500  | 4566800  | 8477300  | 3311600  | 11317000 | 12047000 |
| 2188600  | 1023200  | 865370   | 948010   | 1120500  | 546660   | 680510   | 624150   | 1331900  |
| 10790000 | 2615500  | 12031000 | 409580   | 9383900  | 19149000 | 1070800  | 9065700  | 7795300  |
| 3898700  | 426320   | 0        | 239380   | 520440   | 662200   | 0        | 0        | 0        |
| 25231000 | 1,21E+08 | 83370000 | 16603000 | 17858000 | 1,4E+08  | 64703000 | 77697000 | 8362400  |
| 829560   | 31504000 | 14057000 | 3685700  | 2937800  | 18960000 | 17700000 | 18595000 | 1688900  |
| 39489    | 117180   | 160360   | 180700   | 115960   | 96832    | 63601    | 75511    | 42765    |
| 4583300  | 1771200  | 708920   | 423580   | 135310   | 1041400  | 2859000  | 1657300  | 5877900  |
| 0        | 33527    | 51927    | 17977    | 26782    | 29206    | 19278    | 49526    | 15066    |
| 2108400  | 3685500  | 1731300  | 1011400  | 2108400  | 6948300  | 2919600  | 3027700  | 3947300  |
| 171190   | 846360   | 958140   | 437690   | 461990   | 755570   | 834130   | 690680   | 726870   |
| 29990000 | 34102000 | 26451000 | 39245000 | 36520000 | 32588000 | 23544000 | 39796000 | 54007000 |
| 1439800  | 3694900  | 3112200  | 343170   | 380430   | 126050   | 195770   | 2566000  | 14129000 |
| 8,16E+08 | 4,44E+09 | 3,85E+09 | 3E+09    | 3,04E+09 | 3,67E+09 | 3,43E+09 | 3,97E+09 | 3,71E+09 |
| 51006000 | 46953000 | 35582000 | 27638000 | 29204000 | 29268000 | 35476000 | 45700000 | 47358000 |
| 1738300  | 20937000 | 1656400  | 12164000 | 1293400  | 471300   | 2559900  | 9277100  | 3266000  |
| 8671100  | 15272000 | 14231000 | 21665000 | 8360200  | 5621200  | 6073100  | 15873000 | 8153000  |
| 17469000 | 78262000 | 16449000 | 1,11E+08 | 94139000 | 61383000 | 57606000 | 89905000 | 60342000 |

|          |          |          |          |          |          |          |          |          |
|----------|----------|----------|----------|----------|----------|----------|----------|----------|
| 2,74E+08 | 80414000 | 63561000 | 1,24E+08 | 1,64E+08 | 1,21E+08 | 2390300  | 40798000 | 3,53E+08 |
| 4368600  | 2286800  | 493440   | 2026700  | 1070600  | 1865300  | 1526300  | 2359100  | 182630   |
| 20475000 | 40651000 | 82397000 | 45655000 | 48278000 | 2749100  | 33811000 | 54151000 | 1,06E+08 |
| 64358000 | 1,26E+08 | 1,05E+08 | 1,03E+08 | 1E+08    | 1,47E+08 | 1,21E+08 | 1,1E+08  | 59192000 |
| 53292000 | 1,23E+08 | 76969000 | 68361000 | 56861000 | 95065000 | 1,11E+08 | 1,3E+08  | 27577000 |
| 2,66E+08 | 3,27E+08 | 3,29E+08 | 2,01E+08 | 1,52E+08 | 3,37E+08 | 1,21E+08 | 1,86E+08 | 1,22E+08 |
| 11216000 | 10729000 | 6854500  | 7890300  | 8859200  | 22486000 | 31864000 | 9694800  | 7987600  |
| 24071000 | 36136000 | 29285000 | 19162000 | 37122000 | 82755000 | 84533000 | 73413000 | 26313000 |
| 343140   | 951700   | 842810   | 444170   | 405350   | 250270   | 232330   | 198010   | 463180   |
| 0        | 6970200  | 1768200  | 1349200  | 785500   | 13768000 | 12798000 | 3233600  | 0        |
| 331050   | 1003900  | 1501600  | 1061100  | 1817800  | 3108300  | 983480   | 2412300  | 1370700  |
| 12470000 | 16906000 | 9237500  | 11047000 | 10283000 | 28313000 | 19470000 | 11638000 | 9270000  |
| 38834000 | 24155000 | 14584000 | 58162000 | 27051000 | 14253000 | 23726000 | 14500000 | 32792000 |
| 1262900  | 4497700  | 3815300  | 1429400  | 2603200  | 4132900  | 953940   | 4290500  | 3173600  |
| 10039000 | 1208500  | 963310   | 2047900  | 1612300  | 4468700  | 3812100  | 3891800  | 3642700  |
| 229220   | 55399    | 509900   | 186320   | 214500   | 1593000  | 365360   | 535810   | 386630   |
| 32548000 | 1,44E+08 | 1,37E+08 | 29788000 | 30909000 | 1,87E+08 | 1,77E+08 | 1,51E+08 | 71265000 |
| 73951000 | 1,26E+08 | 93276000 | 58259000 | 49557000 | 77373000 | 52941000 | 56885000 | 58555000 |
| 41721000 | 22917000 | 55426000 | 50588000 | 51872000 | 66047000 | 52326000 | 54662000 | 47693000 |
| 6041600  | 1539200  | 1123000  | 4216800  | 2592600  | 3228500  | 1910400  | 957120   | 2338700  |
| 3359300  | 8412800  | 5438900  | 6098600  | 4135700  | 4105700  | 5691200  | 4894700  | 2899900  |
| 37044000 | 6,17E+08 | 6,56E+08 | 3,42E+08 | 3,78E+08 | 8,27E+08 | 5,07E+08 | 6,61E+08 | 4,61E+08 |
| 12228    | 3302700  | 2706200  | 154290   | 101840   | 9393100  | 3185000  | 6156400  | 348900   |
| 4480700  | 35552000 | 46108000 | 43277000 | 22996000 | 22419000 | 18940000 | 21083000 | 6627200  |
| 89459000 | 2,27E+08 | 1,72E+08 | 80458000 | 1,9E+08  | 2,73E+08 | 77437000 | 2,05E+08 | 1,84E+08 |
| 10602000 | 682660   | 107950   | 3928300  | 1997000  | 157980   | 575110   | 13801    | 2641500  |
| 1647400  | 15260000 | 10844000 | 815300   | 6598700  | 553060   | 6074900  | 7715300  | 6578000  |
| 1436400  | 9821700  | 3074100  | 3137100  | 4096500  | 9289600  | 5015100  | 7267100  | 706370   |
| 0        | 0        | 12259    | 0        | 0        | 9337300  | 8358200  | 208090   | 46366    |
| 483740   | 7300200  | 6309000  | 0        | 0        | 8564500  | 4318000  | 4088100  | 0        |
| 22271000 | 22491000 | 15471000 | 50178000 | 46881000 | 24443000 | 19879000 | 19544000 | 22028000 |
| 1,39E+08 | 5,7E+08  | 5,05E+08 | 2,63E+08 | 2,72E+08 | 9,2E+08  | 8,35E+08 | 7,71E+08 | 5,14E+08 |
| 1596000  | 10125000 | 7702300  | 1641200  | 446320   | 5853600  | 5587800  | 3250500  | 1408100  |
| 2978200  | 3826700  | 3431600  | 1643600  | 1541200  | 2518900  | 1878200  | 447200   | 6480900  |
| 4,76E+08 | 8,1E+08  | 6,21E+08 | 2,57E+08 | 3,1E+08  | 8,77E+08 | 5,27E+08 | 5,37E+08 | 7,81E+08 |
| 1267800  | 2882900  | 6371400  | 4784800  | 4056400  | 15235000 | 4018500  | 21550000 | 2641200  |
| 1868100  | 4454000  | 2506500  | 2349600  | 3137800  | 3103200  | 1558800  | 1506700  | 5009900  |
| 90036    | 15394    | 329530   | 6993,4   | 4909,4   | 135270   | 54222    | 0        | 0        |
| 5629400  | 10354000 | 6730300  | 3115900  | 3156800  | 4972800  | 3287100  | 3246900  | 5035400  |
| 2008500  | 9008000  | 2518100  | 1584600  | 1880700  | 7710800  | 6280400  | 6192800  | 2710700  |
| 79332000 | 38383000 | 35204000 | 1,24E+08 | 93233000 | 64160000 | 79940000 | 1,1E+08  | 12496000 |
| 2,23E+08 | 3,06E+08 | 4,34E+08 | 2,56E+08 | 2,26E+08 | 3,54E+08 | 5,09E+08 | 3,99E+08 | 2,56E+08 |
| 17027000 | 50769000 | 43176000 | 10246000 | 12801000 | 34611000 | 22162000 | 38012000 | 41163000 |
| 1002300  | 2291100  | 298270   | 4330600  | 1230900  | 1098200  | 31634    | 2128700  | 45655    |
| 8828800  | 18841000 | 39162000 | 31162000 | 18598000 | 70020000 | 52721000 | 78125000 | 53814000 |
| 64480000 | 61455000 | 47967000 | 81579000 | 79961000 | 39820000 | 31420000 | 45717000 | 47305000 |
| 796200   | 11279000 | 1882200  | 2097100  | 2292300  | 1681000  | 1691800  | 1994000  | 2372100  |
| 627300   | 0        | 259280   | 0        | 106910   | 199590   | 134440   | 0        | 119610   |
| 606330   | 1428800  | 705030   | 385330   | 366140   | 6432200  | 5349700  | 7451000  | 1874600  |
| 1145700  | 3091000  | 7271200  | 23391    | 24282    | 5657100  | 14586000 | 4065100  | 33088    |

|               |          |          |          |          |          |          |          |          |
|---------------|----------|----------|----------|----------|----------|----------|----------|----------|
| 11247         | 2089000  | 4025700  | 2553100  | 389920   | 8701000  | 8097200  | 8049000  | 10453000 |
| 4508100       | 1681400  | 1779200  | 4359700  | 4883800  | 125270   | 1068700  | 781010   | 1739900  |
| 169680        | 356090   | 276600   | 30010    | 112440   | 333970   | 228640   | 180750   | 155470   |
| 666160        | 11817000 | 12244000 | 473290   | 507440   | 17952000 | 11642000 | 17567000 | 9736500  |
| 594070        | 19758000 | 19612000 | 11722000 | 4948700  | 14865000 | 27437000 | 21406000 | 10862000 |
| 2757500       | 3006000  | 1305800  | 131070   | 1043500  | 10562000 | 6756600  | 9589000  | 15967    |
| 46266000      | 1,76E+08 | 1,62E+08 | 38799000 | 44761000 | 1,91E+08 | 1,43E+08 | 77791000 | 12925000 |
| 139740        | 117150   | 68191    | 63067    | 54501    | 139180   | 112320   | 239270   | 431040   |
| 1388700       | 4070700  | 1956000  | 2171900  | 4670600  | 129090   | 1783300  | 217560   | 6742400  |
| 2400400       | 3246700  | 880040   | 2253100  | 2151800  | 2390600  | 1228800  | 1277400  | 2739700  |
| 8268700       | 40633000 | 37509000 | 16472000 | 19337000 | 50362000 | 39359000 | 30740000 | 21783000 |
| 21210         | 126400   | 78488    | 13311    | 4421,6   | 397330   | 213590   | 275180   | 296080   |
| 2275500       | 2467700  | 1610100  | 1462700  | 1821500  | 11595000 | 6207100  | 10618000 | 3689400  |
| 7526900       | 10733000 | 8014900  | 14101000 | 17800000 | 4814100  | 2890200  | 6051100  | 13808000 |
| 513650        | 931210   | 897700   | 6536200  | 7923900  | 400690   | 4095300  | 496770   | 3853400  |
| 1255100       | 1123100  | 1425600  | 1134700  | 658420   | 4209400  | 2148600  | 2700100  | 341170   |
| 4103600       | 1020700  | 491180   | 6317600  | 5408000  | 1910900  | 1219800  | 1699900  | 3490100  |
| 4598400       | 18907000 | 12056000 | 11895000 | 10116000 | 32147000 | 25670000 | 21787000 | 12655000 |
| 380930        | 394450   | 233370   | 333960   | 298120   | 154210   | 2507900  | 5769400  | 1300500  |
| 8304200       | 29925000 | 25528000 | 23943000 | 6387100  | 53006000 | 50748000 | 40329000 | 20034000 |
| 6558500       | 22155000 | 28806000 | 5749200  | 8895100  | 22967000 | 18273000 | 24302000 | 7720700  |
| 34223000      | 53591000 | 84912000 | 49173000 | 51800000 | 709250   | 56249000 | 73459000 | 36044000 |
| 407710        | 11692000 | 2004100  | 601500   | 533500   | 1029100  | 894900   | 1298100  | 1116900  |
| 180960        | 5026,6   | 71172    | 447070   | 489760   | 97372    | 93446    | 3427,8   | 325230   |
| 5932800       | 8989800  | 4447200  | 8801900  | 5473300  | 4462300  | 4106700  | 282780   | 1566800  |
| 2005400       | 3735400  | 3343100  | 4371100  | 2649200  | 1479700  | 2865200  | 8327400  | 6255300  |
| 18015000      | 42766000 | 51836000 | 25624000 | 15732000 | 49831000 | 47011000 | 44505000 | 41083000 |
| 29774000      | 19025000 | 14395000 | 11715000 | 20917000 | 29962000 | 29046000 | 32674000 | 22030000 |
| 2969700       | 211360   | 210550   | 320570   | 293730   | 95702    | 57033    | 50182    | 59157    |
| 3991300       | 19748000 | 8706300  | 3972100  | 3031300  | 555610   | 12290000 | 872070   | 8137400  |
| 25922000      | 16702000 | 78997000 | 40511000 | 42579000 | 848060   | 2288400  | 83522000 | 255490   |
| 7578700       | 2440000  | 4405000  | 5696500  | 4542000  | 13366000 | 7409900  | 7991700  | 8534100  |
| 1814000       | 3075400  | 199930   | 6636400  | 4079000  | 5406000  | 3141300  | 2235200  | 242170   |
| 1581800       | 0        | 122590   | 458910   | 9392300  | 0        | 0        | 0        | 2258000  |
| 9785800       | 13476000 | 17330000 | 15479000 | 20954000 | 4618500  | 13932000 | 12040000 | 12251000 |
| 1,03E+09      | 1,52E+09 | 1,4E+09  | 3,32E+09 | 3,3E+09  | 2,41E+09 | 1,93E+09 | 2,37E+09 | 1,15E+09 |
| 2198700       | 9511400  | 9987700  | 12240000 | 5983300  | 440490   | 4866300  | 4471200  | 2736900  |
| 6838400       | 2331300  | 2585400  | 22674000 | 23935000 | 7904300  | 7630300  | 4619600  | 25856000 |
| 19128000      | 57285000 | 51440000 | 34573000 | 34508000 | 67250000 | 62687000 | 56468000 | 32542000 |
| 17176000      | 2,09E+08 | 3,59E+08 | 33559000 | 14240    | 4,98E+08 | 8,76E+08 | 2,59E+08 | 1914200  |
| 0             | 22733000 | 25546000 | 16728    | 19658    | 31133000 | 41316000 | 29162000 | 229830   |
| 63748         | 22608000 | 38373000 | 133460   | 1171200  | 44600000 | 35582000 | 18577000 | 375850   |
| ntigen OS=Hom |          |          |          |          |          |          |          |          |
| 831260        | 10998000 | 2704600  | 1052500  | 0        | 23233000 | 16291000 | 17599000 | 5953100  |
| 87889         | 73687    | 65350    | 251030   | 281800   | 45721    | 51231    | 38103    | 60169    |
| 32887         | 11261000 | 14385000 | 31679000 | 46276000 | 30816000 | 12062000 | 21324000 | 10422000 |
| 171330        | 17590000 | 16631000 | 12359000 | 19762000 | 13544000 | 7727300  | 6778300  | 7545500  |
| 15246000      | 58785000 | 96481000 | 42391000 | 17423000 | 99906000 | 79547000 | 82599000 | 24076000 |
| 1871000       | 9836600  | 6318200  | 5023200  | 4078400  | 3430000  | 9821800  | 17080000 | 91666    |
| 2,21E+08      | 2,64E+08 | 1,87E+08 | 77783000 | 96763000 | 1,29E+08 | 1,09E+08 | 70512000 | 1,38E+08 |

|          |          |          |          |          |          |          |          |          |
|----------|----------|----------|----------|----------|----------|----------|----------|----------|
| 887020   | 19300000 | 10887000 | 4722400  | 8407000  | 19072000 | 28634000 | 32527000 | 10037000 |
| 17654000 | 34429000 | 9474100  | 6613300  | 4293100  | 27189    | 5624200  | 2548800  | 4417600  |
| 1,43E+08 | 2,12E+08 | 2,47E+08 | 2,1E+08  | 1,1E+08  | 2,03E+08 | 2,09E+08 | 2,3E+08  | 3,12E+08 |
| 46364000 | 6,46E+08 | 4,47E+08 | 2,12E+08 | 1,39E+08 | 3,49E+08 | 3,66E+08 | 3,06E+08 | 1,93E+08 |
| 0        | 1844100  | 7713300  | 0        | 670990   | 29065000 | 22905000 | 45292000 | 3167000  |
| 14813000 | 68825000 | 27235000 | 5365200  | 26930000 | 7431400  | 23949000 | 42821000 | 20424000 |
| 3127200  | 10215000 | 6946400  | 1788900  | 3031000  | 21819000 | 14093000 | 21828000 | 9978000  |

Student's T Student's T Student's T Student's T Majority p Fasta headers

|          |          |          |          |                                                   |
|----------|----------|----------|----------|---------------------------------------------------|
| 0,933574 | 0,957416 | -0,04553 | -0,07348 | CON__P00761                                       |
| 0,009543 | 0,105333 | 1,522588 | 3,217542 | CON__P02 ;sp P02533 K1C14_HUMAN Keratin, type I c |
| 0,000678 | 0,0104   | 3,195041 | 6,05605  | tr B4DRU6 B4DRU6 B4DRU6_HUMAN cDNA FLJ5465        |
| 0,030138 | 0,144    | 4,794743 | 2,822366 | sp P08779 P08779 K1C16_HUMAN Keratin, type I c    |
| 0,314473 | 0,464058 | 2,098201 | 1,061241 | sp P13645 P13645 K1C10_HUMAN Keratin, type I c    |
| 0,004429 | 0,093143 | 1,841355 | 3,877429 | CON__P13 ;sp P13647 K2C5_HUMAN Keratin, type II c |
| 0,200843 | 0,342776 | 2,811212 | 1,399306 | CON__P35 ;sp P35527 K1C9_HUMAN Keratin, type I cy |
| 0,011495 | 0,103048 | 2,795826 | 3,416882 | sp Q04695 Q04695 K1C17_HUMAN Keratin, type I c    |
| 0,161013 | 0,309    | -2,40899 | -1,53933 | tr A0M8Q9 A0M8Q9 A0M8Q9_HUMAN C1 segment          |
| 0,006829 | 0,090824 | 2,325798 | 3,721142 | tr A0A1U9X8Y4 A0A1U9X8Y4 A0A1U9X8Y4_HUMAN Chlc    |
| 0,173662 | 0,503744 | -0,23077 | -0,93989 | sp O00391 O00391 QSOX1_HUMAN Sulfhydryl oxid      |
| 0,078788 | 0,285622 | -0,71979 | -1,6868  | tr E9PFW2 E9PFW2 E9PFW2_HUMAN Beta-mannosi        |
| 0,025391 | 0,211709 | -0,57956 | -2,04062 | sp O00468 O00468-6 AGRIN_HUMAN Isoform 6 of A     |
| 0,668577 | 0,798773 | -0,4956  | -0,41625 | sp O00560 O00560-2 SDCB1_HUMAN Isoform 2 of S     |
| 0,69827  | 0,839165 | 0,12475  | 0,309004 | tr Q6FI18 Q6FI18 Q6FI18_HUMAN CYR61 protein C     |
| 0,558562 | 0,750911 | 0,242966 | 0,497979 | tr A0AV88 A0AV88 A0AV88_HUMAN Disintegrin anc     |
| 0,652324 | 0,787713 | 0,438661 | 0,431635 | tr Q53HL1 Q53HL1 Q53HL1_HUMAN Myosin regula       |
| 0,268442 | 0,642141 | -0,15329 | -0,68689 | sp O15230 O15230 LAMA5_HUMAN Laminin subun        |
| 0,210576 | 0,407439 | -0,89296 | -1,23682 | sp O43278 O43278 SPIT1_HUMAN Kunitz-type prot     |
| 0,17361  | 0,409025 | 0,484562 | 1,194869 | tr A0A0S2Z3G9 A0A0S2Z3G9 A0A0S2Z3G9_HUMAN Actir   |
| 0,437598 | 0,606736 | -0,84464 | -0,76664 | sp O60245 O60245-2 PCDH7_HUMAN Isoform B of       |
| 0,603494 | 0,761019 | -0,35772 | -0,47965 | sp O60814 O60814 H2B1K_HUMAN Histone H2B ty       |
| 0,022633 | 0,136308 | 3,455642 | 2,972709 | tr B2R717 B2R717 B2R717_HUMAN cDNA, FLJ9323       |
| 0,395929 | 0,533635 | -2,37537 | -0,89324 | tr B4DY05 B4DY05 B4DY05_HUMAN cDNA FLJ5830        |
| 0,252272 | 0,440925 | -0,72044 | -1,09683 | sp O75326 O75326 SEM7A_HUMAN Semaphorin-7A        |
| 0,286866 | 0,563195 | -0,27714 | -0,83334 | sp O75369 O75369-2 FLNB_HUMAN Isoform 2 of Fil    |
| 0,015839 | 0,12336  | 2,214388 | 3,083337 | sp O75635 O75635-2 SPB7_HUMAN Isoform 2 of Se     |
| 0,109853 | 0,271059 | 2,006785 | 1,770272 | tr B4DZ36 B4DZ36 B4DZ36_HUMAN cDNA FLJ58441       |
| 0,24327  | 0,428812 | 0,703169 | 1,113125 | tr B3KNF2 B3KNF2 B3KNF2_HUMAN cDNA FLJ1448        |
| 0,87823  | 0,916112 | -0,05925 | -0,12674 | tr I1W660 I1W660 I1W660_HUMAN Dickkopf-like p     |
| 0,345758 | 0,628612 | -0,22324 | -0,70973 | sp O94985 O94985-2 CSTN1_HUMAN Isoform 2 of C     |
| 0,48912  | 0,630242 | 1,533889 | 0,711588 | tr B3KQQ9 B3KQQ9 B3KQQ9_HUMAN cDNA PSEC00         |
| 0,382896 | 0,563835 | 0,629514 | 0,830092 | tr Q5JPJ9 Q5JPJ9 Q5JPJ9_HUMAN Uncharacterized     |
| 0,109494 | 0,322826 | 0,59915  | 1,467828 | sp O95633 O95633-2 FSTL3_HUMAN Isoform 2 of F     |
| 0,197558 | 0,491528 | 0,299145 | 0,992576 | tr V9HWB9 V9HWB9 V9HWB9_HUMAN L-lactate de        |
| 0,349426 | 0,501792 | -1,13862 | -0,94615 | tr B3KUZ8 B3KUZ8 B3KUZ8_HUMAN Aspartate amir      |
| 0,122994 | 0,2999   | -1,11396 | -1,58909 | sp P00558 P00558-2 PGK1_HUMAN Isoform 2 of Ph     |
| 0,097141 | 0,252862 | -1,85161 | -1,83576 | tr B8ZX62 B8ZX62 B8ZX62_HUMAN Plasminogen ac      |
| 0,000478 | 0,008667 | -2,43379 | -6,05135 | tr V9HWA9 V9HWA9 V9HWA9_HUMAN C3-beta-c O         |
| 0,084467 | 0,297632 | 0,680743 | 1,632746 | tr Q5H9A7 Q5H9A7 Q5H9A7_HUMAN Metalloprotei       |
| 0,084009 | 0,305929 | 0,537806 | 1,537097 | tr A0A0K0K1J1 A0A0K0K1J1 A0A0K0K1J1_HUMAN Epidic  |
| 0,502913 | 0,704776 | 0,307134 | 0,58426  | tr H0YMD1 H0YMD1 H0YMD1_HUMAN Low-density         |
| 0,835554 | 0,899898 | -0,09239 | -0,17682 | tr F6MZX5 F6MZX5 F6MZX5_HUMAN Insulin (Fragm      |
| 0,28521  | 0,479636 | 0,643329 | 1,008721 | sp P01834 P01834 IGKC_HUMAN Immunoglobulin I      |
| 0,228147 | 0,488257 | 0,39063  | 1,015886 | tr Q8NCL6 Q8NCL6 Q8NCL6_HUMAN cDNA FLJ9017        |
| 0,204807 | 0,355412 | -1,83905 | -1,35035 | tr A9LSU1 A9LSU1 A9LSU1_HUMAN Type IV collage     |
| 0,198649 | 0,411044 | 0,751528 | 1,237309 | sp P02545 P02545 LMNA_HUMAN Prelamin-A/C O        |
| 0,03037  | 0,355379 | -0,24399 | -1,344   | tr A0A0S2Z3D5 A0A0S2Z3D5 A0A0S2Z3D5_HUMAN Apol    |

|          |          |          |          |               |                                |                    |
|----------|----------|----------|----------|---------------|--------------------------------|--------------------|
| 0,955059 | 0,975041 | 0,046409 | 0,052531 | sp P02751     | sp P02751 FINC_HUMAN           | Fibronectin OS=H   |
| 0,371276 | 0,544845 | 0,803837 | 0,874955 | tr D6RBJ7     | tr D6RBJ7 D6RBJ7_HUMAN         | Gc-globulin OS=    |
| 0,226825 | 0,546765 | 0,235458 | 0,869067 | sp P02787     | sp P02787 TRFE_HUMAN           | Serotransferrin O  |
| 0,213387 | 0,419429 | 0,610215 | 1,155433 | sp P02790     | sp P02790 HEMO_HUMAN           | Hemopexin OS=      |
| 0,571477 | 0,738819 | 0,354302 | 0,516886 | tr Q5TZP0     | tr Q5TZP0 Q5TZP0_HUMAN         | Matrix metallo     |
| 0,595101 | 0,78011  | -0,21628 | -0,44935 | sp P04075     | sp P04075-2 ALDOA_HUMAN        | Isoform 2 of I     |
| 0,883284 | 0,906728 | 0,163558 | 0,141137 | tr Q76LA1     | tr Q76LA1 Q76LA1_HUMAN         | CSTB protein C     |
| 0,041217 | 0,149702 | -1,64815 | -2,34301 | sp P04083     | sp P04083 ANXA1_HUMAN          | Annexin A1 OS=     |
| 0,303804 | 0,485277 | 0,884523 | 1,014263 | tr O75942     | tr O75942 O75942_HUMAN         | Major prion pr     |
| 0,104435 | 0,254438 | 2,572591 | 1,839423 | tr H6VRG3     | tr H6VRG3 H6VRG3_HUMAN         | Cytokeratin-1      |
| 0,8472   | 0,902572 | 0,269262 | 0,188695 | tr E7EUT5     | tr E7EUT5 E7EUT5_HUMAN         | Glyceraldehyde     |
| 0,968467 | 0,977172 | -0,02552 | -0,03573 | tr A0A0U1RRH7 | tr A0A0U1RRH7 A0A0U1RRH7_HUMAN | His                |
| 0,372969 | 0,669596 | -0,18482 | -0,63959 | sp P05067     | sp P05067-8 A4_HUMAN           | Isoform APP751 c   |
| 0,503912 | 0,667453 | -0,69889 | -0,65254 | sp P05109     | sp P05109 S10A8_HUMAN          | Protein S100-A8    |
| 0,627711 | 0,751163 | -0,98937 | -0,49062 | tr B2R7Y0     | tr B2R7Y0 B2R7Y0_HUMAN         | cDNA, FLJ9365      |
| 0,602661 | 0,752056 | 0,446723 | 0,49385  | tr A0A024QYT5 | tr A0A024QYT5 A0A024QYT5_HUMAN | Serp               |
| 0,659023 | 0,820494 | -0,12581 | -0,34147 | tr A0A348GSH7 | tr A0A348GSH7 A0A348GSH7_HUMAN | Serp               |
| 0,796615 | 0,881389 | -0,13554 | -0,22642 | tr A0A024RCA7 | tr A0A024RCA7 A0A024RCA7_HUMAN | Ribc               |
| 0,691878 | 0,831435 | -0,13294 | -0,3192  | sp P05556     | sp P05556 ITB1_HUMAN           | Integrin beta-1 OS |
| 0,079614 | 0,283562 | -0,74964 | -1,69774 | sp P06396     | sp P06396 GELS_HUMAN           | Gelsolin OS=Hom    |
| 0,440928 | 0,622382 | 0,617159 | 0,736772 | tr B2R4M6     | tr B2R4M6 B2R4M6_HUMAN         | Protein S100       |
| 0,170101 | 0,404983 | -0,50986 | -1,21887 | tr R4GN98     | tr R4GN98 R4GN98_HUMAN         | Protein S100 (     |
| 0,656652 | 0,804991 | 0,209469 | 0,385357 | sp P06733     | sp P06733 ENOA_HUMAN           | Alpha-enolase O    |
| 0,161909 | 0,410365 | 0,492697 | 1,230491 | tr A0A2U3TZU2 | tr A0A2U3TZU2 A0A2U3TZU2_HUMAN | Gluc               |
| 0,303423 | 0,671361 | 0,141182 | 0,632743 | tr A0A0S2Z4G7 | tr A0A0S2Z4G7 A0A0S2Z4G7_HUMAN | Nucl               |
| 5,07E-05 | 0        | -5,71043 | -10,4934 | sp P06753     | sp P06753-3 TPM3_HUMAN         | Isoform 3 of Tr    |
| 0,674537 | 0,786054 | -1,25475 | -0,43029 | tr B4DMR3     | tr B4DMR3 B4DMR3_HUMAN         | cDNA FLJ518        |
| 0,00035  | 0,041455 | 0,972214 | 4,564527 | tr A0A5F9ZHM4 | tr A0A5F9ZHM4 A0A5F9ZHM4_HUMAN | L-ly               |
| 0,831577 | 0,901879 | 0,04797  | 0,152725 | sp P07237     | sp P07237 PDIA1_HUMAN          | Protein disulfide  |
| 0,004726 | 0,1032   | 1,199645 | 3,447239 | sp P07339     | sp P07339 CATD_HUMAN           | Cathepsin D OS=    |
| 0,050505 | 0,229143 | -0,72085 | -1,89037 | sp P07355     | sp P07355 ANXA2_HUMAN          | Annexin A2 OS=     |
| 0,145509 | 0,411567 | 0,390706 | 1,195672 | tr Q53FJ5     | tr Q53FJ5 Q53FJ5_HUMAN         | Prosaposin (Var    |
| 0,737447 | 0,825976 | -0,4994  | -0,33098 | tr Q5T8F0     | tr Q5T8F0 Q5T8F0_HUMAN         | Cathepsin L1 O     |
| 0,150722 | 0,3436   | -0,75355 | -1,38417 | sp P07737     | sp P07737 PROF1_HUMAN          | Profilin-1 OS=H    |
| 0,882289 | 0,91369  | 0,086437 | 0,132003 | sp P07858     | sp P07858 CATB_HUMAN           | Cathepsin B OS=    |
| 0,133184 | 0,577216 | -0,14828 | -0,81132 | sp P07942     | sp P07942 LAMB1_HUMAN          | Laminin subuni     |
| 0,406776 | 0,672677 | 0,204539 | 0,627582 | sp P07996     | sp P07996 TSP1_HUMAN           | Thrombospondin     |
| 0,502755 | 0,706995 | -0,27956 | -0,57368 | tr A0A024RD80 | tr A0A024RD80 A0A024RD80_HUMAN | Hea                |
| 0,346045 | 0,673056 | -0,15415 | -0,62097 | tr Q53H39     | tr Q53H39 Q53H39_HUMAN         | Activin beta-A     |
| 0,448404 | 0,644761 | 0,42178  | 0,68804  | tr A0A024RDW8 | tr A0A024RDW8 A0A024RDW8_HUMAN | Cc                 |
| 0,833778 | 0,898415 | -0,08578 | -0,17577 | sp P08581     | sp P08581-2 MET_HUMAN          | Isoform 2 of He    |
| 0,102537 | 0,268179 | -1,66318 | -1,78167 | tr Q53HU8     | tr Q53HU8 Q53HU8_HUMAN         | Vimentin (Fra      |
| 0,343487 | 0,643894 | 0,189701 | 0,674215 | tr V9HWE0     | tr V9HWE0 V9HWE0_HUMAN         | Annexin OS=        |
| 0,786715 | 0,874656 | 0,230617 | 0,254045 | tr A8MX94     | tr A8MX94 A8MX94_HUMAN         | GST class-pi C     |
| 0,031715 | 0,136111 | -2,66143 | -2,65939 | sp P09341     | sp P09341 GROA_HUMAN           | Growth-regulate    |
| 0,19233  | 0,35501  | -1,40141 | -1,36015 | tr A0A384MR27 | tr A0A384MR27 A0A384MR27_HUMAN | Ga                 |
| 0,414889 | 0,686814 | -0,18927 | -0,60473 | sp P09486     | sp P09486 SPRC_HUMAN           | SPARC OS=Homo      |
| 0,000313 | 0,017333 | -2,41583 | -6,45563 | tr F8WCZ6     | tr F8WCZ6 F8WCZ6_HUMAN         | Complement (       |
| 0,670227 | 0,796916 | -0,45749 | -0,41133 | tr Q59EM9     | tr Q59EM9 Q59EM9_HUMAN         | Ubiquitin C v      |
| 0,115249 | 0,412324 | 0,359629 | 1,244965 | sp Q01105     | sp Q01105-3 SET_HUMAN          | Isoform 3 of Pro   |

|          |          |          |          |                                          |                     |
|----------|----------|----------|----------|------------------------------------------|---------------------|
| 0,070607 | 0,229097 | -1,15124 | -1,91039 | tr A0A0G2tr A0A0G2JIW1 A0A0G2JIW1_HUMAN  | Heat                |
| 0,983855 | 0,984053 | 0,008065 | 0,01683  | tr B4DJ51 tr B4DJ51 B4DJ51_HUMAN         | Calmodulin OS=      |
| 0,217039 | 0,536785 | 0,243475 | 0,893724 | sp P10586 sp P10586-2 PTPRF_HUMAN        | Isoform 2 of R      |
| 0,194305 | 0,407483 | 0,681185 | 1,228222 | sp P10599 sp P10599 THIO_HUMAN           | Thioredoxin OS=     |
| 0,841041 | 0,905025 | -0,06952 | -0,16201 | sp P11021 sp P11021 BIP_HUMAN            | Endoplasmic reticu  |
| 0,132943 | 0,425606 | -0,30119 | -1,12394 | tr A0A024 tr A0A024R972 A0A024R972_HUMAN | Lami                |
| 0,343681 | 0,558699 | -0,47386 | -0,85652 | sp P11142 sp P11142 HSP7C_HUMAN          | Heat shock cogr     |
| 0,286813 | 0,47742  | -0,82541 | -1,04144 | tr A0A087 tr A0A087X0S5 A0A087X0S5_HUMAN | Colla               |
| 0,734988 | 0,874954 | 0,083198 | 0,250279 | tr A0A024 tr A0A024R694 A0A024R694_HUMAN | Alph                |
| 0,0043   | 0,136216 | -0,55505 | -2,61539 | tr B3GN61 tr B3GN61 B3GN61_HUMAN         | Truncated E-c       |
| 0,538222 | 0,673    | 1,120377 | 0,62361  | tr A6XNE3 tr A6XNE3 A6XNE3_HUMAN         | Interferon gar      |
| 0,049084 | 0,277314 | 0,526691 | 1,73434  | tr A0A384 tr A0A384N6H1 A0A384N6H1_HUMAN | Epi                 |
| 0,013357 | 0,129524 | 0,767458 | 2,517029 | tr A0A090 tr A0A090N8Y2 A0A090N8Y2_HUMAN | Prot                |
| 0,355136 | 0,502761 | 1,279134 | 0,943441 | tr J3KPG2 tr J3KPG2 J3KPG2_HUMAN         | Translationally-    |
| 0,268136 | 0,496863 | 0,412476 | 0,956629 | tr V9HWJ7 tr V9HWJ7 V9HWJ7_HUMAN         | Epididymis se       |
| 0,218828 | 0,429631 | 0,567276 | 1,126491 | sp P13987 sp P13987-2 CD59_HUMAN         | Isoform 2 of CD     |
| 0,907682 | 0,929958 | 0,192476 | 0,114691 | tr A0A0S2 tr A0A0S2Z4A0 A0A0S2Z4A0_HUMAN | Prote               |
| 0,090684 | 0,276958 | -0,99342 | -1,728   | sp P14543 sp P14543-2 NID1_HUMAN         | Isoform 2 of Ni     |
| 0,112339 | 0,264667 | -2,55868 | -1,78952 | sp P14618 sp P14618 KPYM_HUMAN           | Pyruvate kinase     |
| 0,697407 | 0,822314 | -0,20471 | -0,34297 | tr Q5CAQ5 tr Q5CAQ5 Q5CAQ5_HUMAN         | Epididymis se       |
| 0,981886 | 0,98104  | -0,05206 | -0,02282 | tr B3KSS4 tr B3KSS4 B3KSS4_HUMAN         | cDNA FLJ36858       |
| 0,003189 | 0,057846 | 2,614814 | 4,407696 | tr B4DMV tr B4DMM8 B4DMM8_HUMAN          | cDNA FLJ57          |
| 0,107486 | 0,278611 | -1,39611 | -1,7176  | tr B7Z5V2 tr B7Z5V2 B7Z5V2_HUMAN         | cDNA FLJ54141       |
| 0,660591 | 0,798333 | 0,328818 | 0,408408 | sp P15514 sp P15514 AREG_HUMAN           | Amphiregulin OS     |
| 0,802072 | 0,883143 | -0,13092 | -0,21993 | tr A0A024 tr A0A024R8V7 A0A024R8V7_HUMAN | Met                 |
| 0,760604 | 0,862381 | 0,230121 | 0,28234  | sp P16070 sp P16070 CD44_HUMAN           | CD44 antigen OS     |
| 0,324512 | 0,556707 | 0,394598 | 0,855493 | sp P16144 sp P16144-5 ITB4_HUMAN         | Isoform Beta-4E     |
| 0,095347 | 0,299171 | -0,67854 | -1,57579 | sp P17900 sp P17900 SAP3_HUMAN           | Ganglioside GM2     |
| 0,925756 | 0,942325 | -0,1237  | -0,09079 | tr A0A384 tr A0A384NYN5 A0A384NYN5_HUMAN | Me                  |
| 0,315495 | 0,486231 | -0,86255 | -0,98748 | tr Q6FHU2 tr Q6FHU2 Q6FHU2_HUMAN         | Phosphoglyce        |
| 0,250501 | 0,491627 | 0,386781 | 0,972621 | sp P19883 sp P19883-2 FST_HUMAN          | Isoform 2 of Folli  |
| 0,000415 | 0,013    | -2,58479 | -6,2821  | sp P19957 sp P19957 ELAF_HUMAN           | Elafin OS=Homo s    |
| 0,0636   | 0,180157 | -2,55109 | -2,17228 | sp P20827 sp P20827 EFNA1_HUMAN          | Ephrin-A1 OS=H      |
| 0,013832 | 0,134359 | 0,854158 | 2,587314 | tr Q60FE6 tr Q60FE6 Q60FE6_HUMAN         | Filamin A OS=H      |
| 0,053928 | 0,227082 | -0,82735 | -1,92488 | tr E9PPJ5 tr E9PPJ5 E9PPJ5_HUMAN         | Midkine (Fragme     |
| 0,971561 | 0,974067 | 0,063209 | 0,035372 | sp P21810 sp P21810 PGS1_HUMAN           | Biglycan OS=Hor     |
| 0,633583 | 0,801489 | -0,17983 | -0,39562 | tr B4DPP0 tr B4DPP0 B4DPP0_HUMAN         | cDNA FLJ5103        |
| 0,289775 | 0,482761 | -0,6859  | -1,00941 | sp P22223 sp P22223-2 CADH3_HUMAN        | Isoform 2 of (      |
| 0,810868 | 0,892687 | 0,104921 | 0,203377 | sp P22392 sp P22392-2 NDKB_HUMAN         | Isoform 3 of N      |
| 0,167898 | 0,322323 | 1,563692 | 1,46128  | sp P22528 sp P22528 SPR1B_HUMAN          | Cornifin-B OS=H     |
| 0,689135 | 0,800489 | 0,859977 | 0,404149 | sp P22692 sp P22692 IBP4_HUMAN           | Insulin-like growth |
| 0,832552 | 0,900812 | 0,10928  | 0,185026 | tr B4DUV1 tr B4DUV1 B4DUV1_HUMAN         | Fibulin-1 OS=I      |
| 0,386453 | 0,636984 | 0,246016 | 0,684543 | sp P23229 sp P23229-4 ITA6_HUMAN         | Isoform Alpha-6     |
| 0,204926 | 0,429719 | 0,511928 | 1,134141 | tr V9HWC6 tr V9HWC6 V9HWC6_HUMAN         | Peptidyl-pro        |
| 0,003626 | 0,089333 | -1,24182 | -3,63853 | tr E9PK25 tr E9PK25 E9PK25_HUMAN         | Cofilin, non-mu     |
| 0,400676 | 0,5485   | 1,130993 | 0,849186 | sp P24821 sp P24821 TENA_HUMAN           | Tenascin OS=Hor     |
| 0,002042 | 0,030222 | -3,64947 | -5,0539  | sp P25391 sp P25391 LAMA1_HUMAN          | Laminin subuni      |
| 0,282234 | 0,428855 | -1,68183 | -1,12415 | sp P25788 sp P25788-2 PSA3_HUMAN         | Isoform 2 of Pr     |
| 0,622851 | 0,783073 | -0,28887 | -0,44334 | sp P25789 sp P25789-2 PSA4_HUMAN         | Isoform 2 of Pr     |
| 0,18482  | 0,337208 | -1,80512 | -1,41668 | tr Q59F03 tr Q59F03 Q59F03_HUMAN         | Integrin alpha :    |

|          |          |          |          |                                                 |
|----------|----------|----------|----------|-------------------------------------------------|
| 0,046087 | 0,209241 | -0,85458 | -2,01576 | tr V9HWC0 V9HWC0 V9HWC0_HUMAN Epididymis l      |
| 0,017676 | 0,303373 | 0,283962 | 1,563503 | tr Q53G71 Q53G71 Q53G71_HUMAN Calreticulin va   |
| 0,166023 | 0,323473 | 1,616096 | 1,472923 | sp P27930 P27930 IL1R2_HUMAN Interleukin-1 rec  |
| 0,793044 | 0,880821 | 0,149978 | 0,233641 | tr Q5U0A0 Q5U0A0 Q5U0A0_HUMAN Proteasome s      |
| 0,687187 | 0,825967 | -0,1429  | -0,32872 | sp P28799 P28799 GRN_HUMAN Progranulin OS=H     |
| 0,08696  | 0,374885 | -0,3447  | -1,31456 | sp P29034 P29034 S10A2_HUMAN Protein S100-A2    |
| 0,551527 | 0,69988  | 0,789271 | 0,590308 | sp P29317 P29317-2 EPHA2_HUMAN Isoform 2 of E   |
| 0,946023 | 0,972811 | 0,01003  | 0,041629 | tr V9HWD9 V9HWD9 V9HWD9_HUMAN Epididymis l      |
| 0,591719 | 0,796478 | 0,151156 | 0,415269 | tr D9IAI1 D9IAI1 D9IAI1_HUMAN Epididymis secret |
| 0,716748 | 0,844608 | 0,140572 | 0,301625 | tr B3KQT9 B3KQT9 B3KQT9_HUMAN Protein disulfic  |
| 0,816676 | 0,880758 | -0,41551 | -0,23077 | sp P30530 P30530 UFO_HUMAN Tyrosine-protein k   |
| 0,492338 | 0,666618 | -0,53224 | -0,64998 | sp P31431 P31431-2 SDC4_HUMAN Isoform 2 of Sy   |
| 0,857703 | 0,905108 | 0,101829 | 0,159242 | tr B4DP51 B4DP51 B4DP51_HUMAN cDNA FLJ5453      |
| 0,014909 | 0,138061 | -1,06611 | -2,71332 | sp P31946 P31946-2 1433B_HUMAN Isoform Short    |
| 0,007776 | 0,136296 | -0,93496 | -2,94152 | sp P31947 P31947 1433S_HUMAN 14-3-3 protein s   |
| 0,470792 | 0,722    | -0,19211 | -0,55466 | tr V9HWH9 V9HWH9 V9HWH9_HUMAN Protein S100      |
| 1        | 1        | 0        | 0        | sp P32004 P32004-3 L1CAM_HUMAN Isoform 3 of L   |
| 0,442921 | 0,722505 | -0,16014 | -0,54787 | tr A0A384NPH9 A0A384NPH9_HUMAN Gly              |
| 0,482416 | 0,620313 | 2,167848 | 0,732752 | sp P35408 P35408 PE2R4_HUMAN Prostaglandin E    |
| 0,005885 | 0,098133 | -2,20083 | -3,79903 | sp P35442 P35442 TSP2_HUMAN Thrombospondin      |
| 0,856913 | 0,903742 | 0,093612 | 0,157822 | sp P35556 P35556 FBN2_HUMAN Fibrillin-2 OS=Ho   |
| 0,709973 | 0,854614 | 0,110567 | 0,29037  | tr A0A024R1N1 A0A024R1N1_HUMAN Myc              |
| 0,354923 | 0,550371 | -0,51647 | -0,85112 | tr A0A024R2B6 A0A024R2B6_HUMAN Serp             |
| 0,919925 | 0,942497 | 0,051949 | 0,087834 | tr X6RJP6 X6RJP6 X6RJP6_HUMAN Transgelin-2 (Fr  |
| 0,014549 | 0,13625  | 1,178216 | 2,7943   | tr D3DSM4 D3DSM4 D3DSM4_HUMAN Collagen, typ     |
| 0,731864 | 0,861365 | -0,11124 | -0,27335 | tr V9HWF2 V9HWF2 V9HWF2_HUMAN Malate dehy       |
| 0,974745 | 0,977177 | 0,019704 | 0,028466 | tr Q6P1N4 Q6P1N4 Q6P1N4_HUMAN IQGAP1 prote      |
| 0,623695 | 0,777413 | -0,35866 | -0,45599 | tr B1AK87 B1AK87 B1AK87_HUMAN F-actin-capping   |
| 0,637214 | 0,766028 | -0,7906  | -0,47172 | tr Q8NE89 Q8NE89 Q8NE89_HUMAN Similar to tiss   |
| 0,375726 | 0,553745 | 0,711263 | 0,855081 | sp P49327 P49327 FAS_HUMAN Fatty acid synthase  |
| 0,279671 | 0,43076  | -1,63385 | -1,12826 | tr Q6FH59 Q6FH59 Q6FH59_HUMAN VEGFC protein     |
| 0,55256  | 0,817384 | -0,08568 | -0,36514 | tr Q5SX91 Q5SX91 Q5SX91_HUMAN Rab GDP disso     |
| 0,227501 | 0,390566 | -1,97666 | -1,28571 | sp P50895 P50895 BCAM_HUMAN Basal cell adhesi   |
| 0,570042 | 0,747736 | -0,29128 | -0,50267 | tr J3KTF8 J3KTF8 J3KTF8_HUMAN Rho GDP-dissoci   |
| 0,317173 | 0,600233 | 0,264197 | 0,782037 | sp P52799 P52799 EFNB2_HUMAN Ephrin-B2 OS=H     |
| 0,001365 | 0,016571 | 3,949118 | 5,519495 | sp P53634 P53634 CATC_HUMAN Dipeptidyl peptid   |
| 0,278198 | 0,414903 | 3,291668 | 1,172834 | sp P55001 P55001-3 MFAP2_HUMAN Isoform B of I   |
| 0,035082 | 0,130537 | -2,12921 | -2,52744 | sp P55058 P55058 PLTP_HUMAN Phospholipid tran   |
| 0,836206 | 0,89775  | 0,12192  | 0,184778 | tr Q96IF9 Q96IF9 Q96IF9_HUMAN VCP protein (Fra  |
| 0,059095 | 0,183692 | 1,846821 | 2,150504 | sp P55145 P55145 MANF_HUMAN Mesencephalic       |
| 0,762766 | 0,862422 | -0,18044 | -0,27093 | sp P55268 P55268 LAMB2_HUMAN Laminin subuni     |
| 0,74256  | 0,822623 | 0,602427 | 0,328302 | sp P55290 P55290-5 CAD13_HUMAN Isoform 5 of C   |
| 0,035286 | 0,152957 | 1,290633 | 2,343152 | tr E9PJK1 E9PJK1 E9PJK1_HUMAN Tetraspanin OS=   |
| 0,617184 | 0,798241 | 0,153579 | 0,395403 | tr B4DUI5 B4DUI5 B4DUI5_HUMAN Triosephosphat    |
| 0,059108 | 0,293766 | 0,495687 | 1,632305 | tr G3V3I1 G3V3I1 G3V3I1_HUMAN Proteasome su     |
| 0,001349 | 0,053    | -1,51963 | -4,51928 | sp P61769 P61769 B2MG_HUMAN Beta-2-microglo     |
| 0,002833 | 0,0965   | 1,184003 | 3,73061  | tr Q53HV6 Q53HV6 Q53HV6_HUMAN Epididymal se     |
| 0,013467 | 0,149867 | -0,64402 | -2,36499 | sp P61981 P61981 1433G_HUMAN 14-3-3 protein     |
| 0,035507 | 0,30386  | -0,33152 | -1,53471 | sp P62258 P62258 1433E_HUMAN 14-3-3 protein e   |
| 0,874802 | 0,906539 | 0,118422 | 0,145446 | tr A2VCK8 A2VCK8 A2VCK8_HUMAN Thymosin beta     |



|          |          |          |          |           |               |                                |
|----------|----------|----------|----------|-----------|---------------|--------------------------------|
| 0,006334 | 0,088421 | 1,816873 | 3,613861 | tr Q0VAS5 | tr Q0VAS5     | Q0VAS5_HUMAN Histone H4 OS     |
| 0,825982 | 0,903659 | 0,092758 | 0,185367 | sp P62937 | sp P62937     | PPIA_HUMAN Peptidyl-prolyl cis |
| 0,131211 | 0,315448 | -0,93179 | -1,51085 | sp P62942 | sp P62942     | FKB1A_HUMAN Peptidyl-prolyl c  |
| 0,007826 | 0,127721 | -0,60664 | -2,5112  | tr D0PNI1 | tr D0PNI1     | D0PNI1_HUMAN Epididymis lumi   |
| 0,134387 | 0,444324 | -0,27676 | -1,08501 | tr B4DVQ0 | tr B4DVQ0     | B4DVQ0_HUMAN cDNA FLJ5828      |
| 0,39993  | 0,5349   | -2,57051 | -0,88792 | sp P63313 | sp P63313     | TYB10_HUMAN Thymosin beta-1    |
| 0,011124 | 0,203037 | 0,439456 | 2,073324 | sp P78324 | sp P78324-2   | SHPS1_HUMAN Isoform 2 of T     |
| 0,019763 | 0,17792  | 0,633691 | 2,202518 | sp P78504 | sp P78504     | JAG1_HUMAN Protein jagged-1    |
| 0,012474 | 0,133286 | -1,27256 | -2,93335 | sp P80188 | sp P80188     | NGAL_HUMAN Neutrophil gelati   |
| 1        | 1        | 0        | 0        | tr E9PKG6 | tr E9PKG6     | E9PKG6_HUMAN Nucleobindin-2    |
| 0,321796 | 0,489931 | -1,00274 | -0,99055 | tr Q86V58 | tr Q86V58     | Q86V58_HUMAN Fibulin 2 OS=H    |
| 0,047535 | 0,3164   | 0,345974 | 1,488456 | sp P98172 | sp P98172     | EFNB1_HUMAN Ephrin-B1 OS=H     |
| 0,103458 | 0,299026 | 0,859334 | 1,61478  | tr Q5T0R7 | tr Q5T0R7     | Q5T0R7_HUMAN Adenylyl cyclase  |
| 0,02738  | 0,139355 | -3,31645 | -2,82067 | tr Q7RTW3 | tr Q7RTW3     | Q7RTW3_HUMAN Neuregulin 1      |
| 0,107903 | 0,296608 | 0,911724 | 1,610173 | sp Q02388 | sp Q02388     | CO7A1_HUMAN Collagen alpha     |
| 0,774981 | 0,858972 | 0,432635 | 0,282087 | tr B4DGN8 | tr B4DGN8     | B4DGN8_HUMAN Procollagen-1     |
| 0,361427 | 0,55041  | -0,57551 | -0,85493 | sp Q02818 | sp Q02818     | NUCB1_HUMAN Nucleobindin-1     |
| 0,615748 | 0,797219 | -0,14945 | -0,39382 | tr A0A024 | tr A0A024R3N3 | A0A024R3N3_HUMAN Amyloid       |
| 0,08162  | 0,420819 | 0,24392  | 1,149786 | tr A0A384 | tr A0A384NPQ2 | A0A384NPQ2_HUMAN Epi           |
| 0,641192 | 0,812936 | 0,154488 | 0,375223 | tr A6NCT7 | tr A6NCT7     | A6NCT7_HUMAN Collagen alpha    |
| 0,260171 | 0,405724 | -1,88154 | -1,18918 | sp Q08345 | sp Q08345-5   | DDR1_HUMAN Isoform 4 of E      |
| 0,001073 | 0,0275   | -2,3696  | -5,26204 | tr A0A0S2 | tr A0A0S2Z3Y1 | A0A0S2Z3Y1_HUMAN Galec         |
| 0,834722 | 0,893228 | -0,38193 | -0,20784 | tr G3V1S6 | tr G3V1S6     | G3V1S6_HUMAN Polypeptide N-    |
| 0,024799 | 0,134632 | -1,46061 | -2,60508 | tr Q59G97 | tr Q59G97     | Q59G97_HUMAN EGF-containin     |
| 0,117987 | 0,399514 | -0,38711 | -1,26808 | sp Q12841 | sp Q12841     | FSTL1_HUMAN Follistatin-relate |
| 0,031373 | 0,134    | 3,096969 | 2,705127 | sp Q12860 | sp Q12860-2   | CNTN1_HUMAN Isoform 2 of       |
| 0,668486 | 0,820852 | -0,13075 | -0,33729 | tr C9J4H5 | tr C9J4H5     | C9J4H5_HUMAN Semaphorin-3F     |
| 0,434108 | 0,645766 | -0,3288  | -0,67543 | tr Q59FV9 | tr Q59FV9     | Q59FV9_HUMAN PTK7 protein t    |
| 1        | 1        | 0        | 0        | tr H3BR90 | tr H3BR90     | H3BR90_HUMAN Mesothelin (Fr    |
| 0,816446 | 0,884183 | 0,535747 | 0,233971 | tr F8WC54 | tr F8WC54     | F8WC54_HUMAN Disintegrin an    |
| 0,955067 | 0,973687 | 0,023295 | 0,04722  | tr A0A0S2 | tr A0A0S2Z3R6 | A0A0S2Z3R6_HUMAN Lami          |
| 0,856248 | 0,904643 | -0,07732 | -0,15298 | sp Q13753 | sp Q13753     | LAMC2_HUMAN Laminin subuni     |
| 0,712755 | 0,824921 | -0,33599 | -0,34926 | tr A0A024 | tr A0A024R2W4 | A0A024R2W4_HUMAN Al            |
| 0,224337 | 0,617841 | 0,163759 | 0,750706 | tr B4DZY7 | tr B4DZY7     | B4DZY7_HUMAN cDNA FLJ57022     |
| 0,007358 | 0,209684 | 0,381558 | 2,032676 | sp Q14512 | sp Q14512     | FGFP1_HUMAN Fibroblast grow    |
| 0,161096 | 0,409926 | -0,53084 | -1,25525 | tr G3V511 | tr G3V511     | G3V511_HUMAN Latent-transfo    |
| 0,36592  | 0,621559 | -0,29258 | -0,74186 | sp Q15084 | sp Q15084-3   | PDIA6_HUMAN Isoform 3 of P     |
| 0,04014  | 0,141091 | 1,903532 | 2,405584 | sp Q15149 | sp Q15149-7   | PLEC_HUMAN Isoform 7 of Pl     |
| 0,24236  | 0,419264 | 0,943591 | 1,16218  | tr Q6SYC2 | tr Q6SYC2     | Q6SYC2_HUMAN Poliovirus rece   |
| 0,159783 | 0,387695 | -0,60451 | -1,29642 | tr Q59EZ1 | tr Q59EZ1     | Q59EZ1_HUMAN Protein tyrosin   |
| 0,436432 | 0,63158  | 0,456621 | 0,713376 | tr A0A0S2 | tr A0A0S2Z4Q2 | A0A0S2Z4Q2_HUMAN Tran          |
| 0,097117 | 0,4115   | -0,31657 | -1,23983 | sp Q16270 | sp Q16270     | IBP7_HUMAN Insulin-like growt  |
| 0,761996 | 0,861473 | -0,15674 | -0,26566 | tr A0A140 | tr A0A140VJI7 | A0A140VJI7_HUMAN Testicu       |
| 0,47785  | 0,718481 | -0,18946 | -0,54584 | tr B3KTA3 | tr B3KTA3     | B3KTA3_HUMAN Fascin OS=Hor     |
| 0,014374 | 0,131    | -0,86849 | -2,58212 | sp Q16769 | sp Q16769     | QPCT_HUMAN Glutaminyl-pept     |
| 0,735671 | 0,86     | -0,12624 | -0,27829 | tr A0A0A6 | tr A0A0A6YF2  | A0A0A6YF2_HUMAN HCG            |
| 0,259281 | 0,406426 | -1,87927 | -1,19147 | sp Q24JP5 | sp Q24JP5     | T132A_HUMAN Transmembrane      |
| 0,585059 | 0,749555 | 0,382145 | 0,505997 | tr B4DTF2 | tr B4DTF2     | B4DTF2_HUMAN Annexin OS=Hc     |
| 0,587325 | 0,721952 | -0,94522 | -0,5461  | sp Q6H3X3 | sp Q6H3X3     | ULBP5_HUMAN UL-16 binding p    |
| 0,137795 | 0,290773 | -2,8782  | -1,6632  | tr A0A024 | tr A0A024R091 | A0A024R091_HUMAN von           |

|          |          |          |          |           |                                             |
|----------|----------|----------|----------|-----------|---------------------------------------------|
| 0,083092 | 0,212    | -2,68989 | -2,00022 | sp Q6UVK  | sp Q6UVK1 CSPG4_HUMAN Chondroitin su        |
| 0,563424 | 0,726029 | 0,482642 | 0,548123 | sp Q6YHK  | sp Q6YHK3-4 CD109_HUMAN Isoform 4 of        |
| 0,218305 | 0,408444 | -0,91375 | -1,21963 | tr B3KRK1 | tr B3KRK1 B3KRK1_HUMAN cDNA FLJ34442        |
| 0,237249 | 0,406532 | -1,90919 | -1,25404 | sp Q86X2  | sp Q86X29-6 LSR_HUMAN Isoform 6 of Lipc     |
| 0,028499 | 0,136    | -2,25431 | -2,68475 | sp Q8IUX7 | sp Q8IUX7 AEBP1_HUMAN Adipocyte enha        |
| 0,344816 | 0,488411 | 1,946838 | 0,989777 | sp Q8IWU  | sp Q8IWU5-2 SULF2_HUMAN Isoform 2 of I      |
| 0,915774 | 0,938014 | -0,08736 | -0,09865 | sp Q8NBP  | sp Q8NBP7 PCSK9_HUMAN Proprotein con        |
| 0,959267 | 0,972854 | 0,029464 | 0,045409 | tr B7Z5C1 | tr B7Z5C1 B7Z5C1_HUMAN cDNA FLJ56126        |
| 0,045871 | 0,196226 | -1,02958 | -2,10242 | sp Q9252  | sp Q92520 FAM3C_HUMAN Protein FAM3C         |
| 0,485787 | 0,672479 | 0,429569 | 0,640145 | sp Q9262  | sp Q92626 PXDN_HUMAN Peroxidasin hor        |
| 0,220128 | 0,488086 | -0,37471 | -1,01972 | sp Q9274  | sp Q92743 HTRA1_HUMAN Serine protease       |
| 0,71405  | 0,818722 | 0,345754 | 0,348777 | sp Q9282  | sp Q92823-5 NRCAM_HUMAN Isoform 5 of        |
| 0,596573 | 0,811068 | 0,110844 | 0,374176 | sp Q9289  | sp Q92896 GSLG1_HUMAN Golgi apparatus       |
| 0,353387 | 0,500535 | -1,15712 | -0,93959 | tr C9JMK5 | tr C9JMK5 C9JMK5_HUMAN Phosphoinosit        |
| 0,861664 | 0,897522 | 0,27822  | 0,172088 | tr V9HWC  | tr V9HWC2 V9HWC2_HUMAN Maillard deg         |
| 0,69475  | 0,821483 | 0,21753  | 0,349127 | tr B7Z4S8 | tr B7Z4S8 B7Z4S8_HUMAN Asparaginyl end      |
| 0,207207 | 0,415418 | 0,892112 | 1,245994 | sp Q9971  | sp Q99715-4 COCA1_HUMAN Isoform 4 of        |
| 0,125488 | 0,314382 | -0,82252 | -1,50222 | sp Q9998  | sp Q99985 SEM3C_HUMAN Semaphorin-3C         |
| 0,1539   | 0,341737 | 0,815796 | 1,392734 | tr A0A140 | tr A0A140VJY7 A0A140VJY7_HUMAN Thior        |
| 0,004867 | 0,101818 | -1,14545 | -3,38445 | sp Q9BRK  | sp Q9BRK5-4 CAB45_HUMAN Isoform 4 of        |
| 0,039148 | 0,207929 | -0,76895 | -2,03895 | sp Q9GZV  | sp Q9GZM7-3 TINAL_HUMAN Isoform 3 of        |
| 0,207547 | 0,414588 | -0,6926  | -1,19693 | sp Q9H29  | sp Q9H299 SH3L3_HUMAN SH3 domain-bir        |
| 0,177966 | 0,337305 | -1,5277  | -1,42097 | sp Q9NPR  | sp Q9NPR2-2 SEM4B_HUMAN Isoform 2 of        |
| 0,560329 | 0,704277 | 0,87073  | 0,581784 | tr F8VQN  | tr F8VQN3 F8VQN3_HUMAN Teneurin-2 OS        |
| 0,090493 | 0,301086 | 0,645386 | 1,580757 | tr Q4ZG85 | tr Q4ZG85 Q4ZG85_HUMAN Uncharacteriz        |
| 0,377943 | 0,62032  | -0,33852 | -0,75216 | sp Q9P2B  | sp Q9P2B2 FPRP_HUMAN Prostaglandin F2       |
| 0,022448 | 0,218133 | -0,49561 | -1,96646 | sp Q9UBP  | sp Q9UBP4 DKK3_HUMAN Dickkopf-relatec       |
| 0,103687 | 0,26713  | 1,623938 | 1,770139 | tr Q5U00  | tr Q5U000 Q5U000_HUMAN Cathepsin X O        |
| 0,846947 | 0,902388 | 0,138339 | 0,177219 | tr B7Z5J4 | tr B7Z5J4 B7Z5J4_HUMAN Carboxypeptidas      |
| 0,906241 | 0,938118 | -0,06373 | -0,10371 | sp Q9UMI  | sp Q9UMD9-2 COHA1_HUMAN Isoform 2 o         |
| 0,130391 | 0,343216 | 0,632086 | 1,405929 | sp Q9UNN  | sp Q9UNN8 EPCR_HUMAN Endothelial prot       |
| 0,010525 | 0,099652 | 2,209536 | 3,372905 | tr A0A2I2 | tr A0A2I2MP48 A0A2I2MP48_HUMAN Kalli        |
| 0,539322 | 0,67804  | 0,886234 | 0,612962 | tr W6I206 | tr W6I206 W6I206_HUMAN Lysyl oxidase h      |
| 0,348354 | 0,484322 | 2,031884 | 0,98431  | tr B2RAF9 | tr B2RAF9 B2RAF9_HUMAN Suppressor of t      |
| 0,610333 | 0,778577 | 0,233089 | 0,440525 | tr D3DVF0 | tr D3DVF0 D3DVF0_HUMAN Junctional adh       |
| 0,627879 | 0,780018 | -0,31152 | -0,44265 | tr A0A024 | tr A0A024R462 A0A024R462_HUMAN Fibro        |
| 0,001844 | 0,0324   | -2,00883 | -4,62096 | tr W8GRM  | tr W8GRM7 W8GRM7_HUMAN Kallikrein 1         |
| 0,805142 | 0,885824 | 0,25393  | 0,235951 | tr A0A024 | tr A0A024R884 A0A024R884_HUMAN Tena         |
| 0,069573 | 0,324    | -0,39106 | -1,44914 | tr A0A024 | tr A0A024RAB6 A0A024RAB6_HUMAN Hep          |
| 0,057841 | 0,148167 | -4,8278  | -2,33289 | tr D7RVA3 | tr D7RVA3 D7RVA3_HUMAN Granulocyte c        |
| 0,358636 | 0,491894 | -2,22648 | -0,96661 | tr A0A1V1 | tr A0A1V1IFQ2 A0A1V1IFQ2_HUMAN MHC          |
| 0,358259 | 0,493105 | -1,90278 | -0,96031 | tr A0A1D6 | tr A0A1D6ZNI8 A0A1D6ZNI8_HUMAN;tr A0A0S4XRM |
| 0,713169 | 0,815412 | -0,5597  | -0,36387 | tr A0A288 | tr A0A288Q9P9 A0A288Q9P9_HUMAN MH           |
| 0,677388 | 0,803791 | 0,388665 | 0,396347 | tr A0A384 | tr A0A384MR03 A0A384MR03_HUMAN Fib          |
| 0,00025  | 0        | -6,72706 | -8,12234 | tr F5H2D0 | tr F5H2D0 F5H2D0_HUMAN Complement s         |
| 0,138829 | 0,315136 | -1,04036 | -1,50491 | tr A8K6T3 | tr A8K6T3 A8K6T3_HUMAN cDNA FLJ78674        |
| 0,288974 | 0,486    | -0,58349 | -0,98552 | tr D3DS13 | tr D3DS13 D3DS13_HUMAN Ribonuclease A       |
| 0,305282 | 0,6312   | 0,194068 | 0,718828 | tr B3KNN  | tr B3KNN9 B3KNN9_HUMAN Activated leuk       |
| 0,187686 | 0,439911 | 0,385751 | 1,093116 | tr B4E1B2 | tr B4E1B2 B4E1B2_HUMAN Beta-1 metal-b       |

|          |          |          |          |                                                  |                                        |
|----------|----------|----------|----------|--------------------------------------------------|----------------------------------------|
| 0,469581 | 0,640409 | 0,550268 | 0,684735 | tr B7Z507                                        | tr B7Z507 B7Z507_HUMAN cDNA FLJ51036   |
| 0,025389 | 0,130483 | 4,023942 | 2,921018 | tr C9JB55 tr C9JB55 C9JB55_HUMAN Serotransferrin |                                        |
| 0,453781 | 0,598682 | 2,028084 | 0,780596 | tr C9JVG0                                        | tr C9JVG0 C9JVG0_HUMAN Serotransferrin |
| 0,048117 | 0,161469 | -1,7889  | -2,2718  | tr E7ET40                                        | tr E7ET40 E7ET40_HUMAN Urokinase-type  |
| 0,787338 | 0,861852 | -0,49638 | -0,2692  | tr V5NQE0                                        | tr V5NQE0 V5NQE0_HUMAN MHC class I ar  |
| 0,959386 | 0,972751 | -0,1059  | -0,05095 | tr H0YBI8                                        | tr H0YBI8 H0YBI8_HUMAN Vascular endoth |
| 0,448264 | 0,717455 | 0,160405 | 0,543675 | tr Q5M8T4                                        | tr Q5M8T4 Q5M8T4_HUMAN Connective ti   |

cytoskeletal 14 OS=Homo sapiens OX=9606 GN=KRT14 PE=1 SV=4;tr|A0A024R1X6|A0A024R1X6\_HUMAN; highly similar to Keratin, type II cytoskeletal 6A OS=Homo sapiens OX=9606 PE=2 SV=1;sp|P02538

ytoskeletal 5 OS=Homo sapiens OX=9606 GN=KRT5 PE=1 SV=3;tr|B4E1T1|B4E1T1\_HUMAN cDNA FL1  
ytoskeletal 9 OS=Homo sapiens OX=9606 GN=KRT9 PE=1 SV=3;tr|K7EQQ3|K7EQQ3\_HUMAN Keratin,  
ytoskeletal 17 OS=Homo sapiens OX=9606 GN=KRT17 PE=1 SV=2;;tr|F5GWP8|F5GWP8\_HUMAN Keratin  
protein (Fragment) OS=Homo sapiens OX=9606 GN=C1 segment PE=4 SV=1;tr|Q5CZ94|Q5CZ94\_HUMAN  
uride intracellular channel protein OS=Homo sapiens OX=9606 PE=3 SV=1;tr|Q5SRT3|Q5SRT3\_HUMAN  
ase 1 OS=Homo sapiens OX=9606 GN=QSOX1 PE=1 SV=3;tr|A0A140VKE5|A0A140VKE5\_HUMAN Sulfatase  
dase OS=Homo sapiens OX=9606 GN=MANBA PE=1 SV=1;tr|B4DT18|B4DT18\_HUMAN Beta-mannosidase  
Agrin OS=Homo sapiens OX=9606 GN=AGRN;sp|O00468-7|AGRIN\_HUMAN Isoform 7 of Agrin OS=Homo sapiens  
Syntenin-1 OS=Homo sapiens OX=9606 GN=SDCBP;tr|G5EA09|G5EA09\_HUMAN Syndecan binding protein  
OS=Homo sapiens OX=9606 GN=CYR61 PE=1 SV=1;sp|O00622|CCN1\_HUMAN CCN family member 1 (Cell  
metallopeptidase domain-containing protein 10 OS=Homo sapiens OX=9606 GN=ADAM10 PE=2 SV=1  
tory light chain MRCL3 variant (Fragment) OS=Homo sapiens OX=9606 PE=2 SV=1;sp|P19105|ML12A

ease inhibitor 1 OS=Homo sapiens OX=9606 GN=SPINT1 PE=1 SV=2;tr|H3BVD9|H3BVD9\_HUMAN Ku  
in alpha 4 isoform 1 (Fragment) OS=Homo sapiens OX=9606 GN=ACTN4 PE=2 SV=1;sp|O43707|ACT  
Protocadherin-7 OS=Homo sapiens OX=9606 GN=PCDH7;sp|O60245|PCDH7\_HUMAN Protocadherin  
pe 1-K OS=Homo sapiens OX=9606 GN=H2BC12 PE=1 SV=3;tr|A0A024RCJ9|A0A024RCJ9\_HUMAN Hi  
5, highly similar to Homo sapiens cathepsin L2 (CTSL2), mRNA OS=Homo sapiens OX=9606 PE=2 SV=1  
3, highly similar to WD repeat protein 1 OS=Homo sapiens OX=9606 PE=2 SV=1;sp|O75083-3|WDR1\_  
A OS=Homo sapiens OX=9606 GN=SEMA7A PE=1 SV=1;sp|O75326-2|SEM7A\_HUMAN Isoform 2 of Se  
lamin-B OS=Homo sapiens OX=9606 GN=FLNB;sp|O75369-9|FLNB\_HUMAN Isoform 9 of Filamin-B O  
rpin B7 OS=Homo sapiens OX=9606 GN=SERPINB7;sp|O75635|SPB7\_HUMAN Serpin B7 OS=Homo s  
L, highly similar to Attractin OS=Homo sapiens OX=9606 PE=2 SV=1;sp|O75882-3|ATRN\_HUMAN Isof  
4 fis, clone MAMMA1002485, highly similar to Stanniocalcin-2 OS=Homo sapiens OX=9606 PE=2 SV=1  
rotein 1 OS=Homo sapiens OX=9606 GN=DKK1 PE=2 SV=1;sp|O94907|DKK1\_HUMAN Dickkopf-relat

48 fis, clone NT2RP2000028, highly similar to Serine protease 23 OS=Homo sapiens OX=9606 PE=2 SV=1;tr|B2RBR3|B2RBR3\_HUMAN protein DKFZp686D0114 OS=Homo sapiens OX=9606 GN=DKFZp686D0114 PE=4 SV=1;tr|B2RBR3|B2RBR3\_HUMAN  
ollistatin-related protein 3 OS=Homo sapiens OX=9606 GN=FSTL3;tr|A0A024R1Y8|A0A024R1Y8\_HUMAN  
hydrogenase OS=Homo sapiens OX=9606 GN=HEL-S-133P PE=2 SV=1;sp|P00338|LDHA\_HUMAN L-lactate  
otransferase OS=Homo sapiens OX=9606 PE=2 SV=1;sp|P00505-2|AATM\_HUMAN Isoform 2 of Aspartate  
osphoglycerate kinase 1 OS=Homo sapiens OX=9606 GN=PGK1;tr|V9HWF4|V9HWF4\_HUMAN Phosphoglycerate  
timator OS=Homo sapiens OX=9606 GN=PLAT PE=2 SV=1;sp|P00750|TPA\_HUMAN Tissue-type plasminogen  
5=Homo sapiens OX=9606 GN=HEL-S-62p PE=2 SV=1;sp|P01024|CO3\_HUMAN Complement C3 OS=Homo sapiens  
nase inhibitor 1 OS=Homo sapiens OX=9606 GN=TIMP1 PE=1 SV=1;tr|Q6FGX5|Q6FGX5\_HUMAN Metalloproteinase  
ymis secretory protein Li 2 OS=Homo sapiens OX=9606 GN=HEL-S-2 PE=2 SV=1;sp|P01034|CYTC\_HUMAN  
lipoprotein receptor OS=Homo sapiens OX=9606 GN=LDLR PE=1 SV=1;tr|Q9UH51|Q9UH51\_HUMAN Low-density  
ent) OS=Homo sapiens OX=9606 GN=INS PE=2 SV=1;tr|A6XGL2|A6XGL2\_HUMAN Insulin OS=Homo sapiens  
cappa constant OS=Homo sapiens OX=9606 GN=IGKC PE=1 SV=2;tr|A0A5H1ZRQ3|A0A5H1ZRQ3\_HUMAN  
0 fis, clone MAMMA1000370, highly similar to Ig alpha-1 chain C region OS=Homo sapiens OX=9606  
n alpha 1 (Fragment) OS=Homo sapiens OX=9606 PE=2 SV=1;tr|A0A3B3ISV3|A0A3B3ISV3\_HUMAN C  
5=Homo sapiens OX=9606 GN=LMNA PE=1 SV=1;tr|A0A384MQX1|A0A384MQX1\_HUMAN Epididymal  
ipoprotein E isoform 1 (Fragment) OS=Homo sapiens OX=9606 GN=APOE PE=2 SV=1;sp|P02649|APOE

omo sapiens OX=9606 GN=FN1 PE=1 SV=5;sp|P02751-7|FINC\_HUMAN Isoform 7 of Fibronectin OS=  
=Homo sapiens OX=9606 GN=GC PE=1 SV=1;sp|P02774-2|VTDB\_HUMAN Isoform 2 of Vitamin D-bind  
S=Homo sapiens OX=9606 GN=TF PE=1 SV=3;tr|Q06AH7|Q06AH7\_HUMAN Beta-1 metal-binding glo

proteinase 1 (Interstitial collagenase) OS=Homo sapiens OX=9606 PE=2 SV=1;tr|Q53G96|Q53G96\_H  
Fructose-bisphosphate aldolase A OS=Homo sapiens OX=9606 GN=ALDOA;tr|V9HWN7|V9HWN7\_HL  
OS=Homo sapiens OX=9606 GN=CSTB PE=2 SV=1;sp|P04080|CYTB\_HUMAN Cystatin-B OS=Homo sap  
=Homo sapiens OX=9606 GN=ANXA1 PE=1 SV=2;tr|Q5TZZ9|Q5TZZ9\_HUMAN Annexin OS=Homo sap  
otein OS=Homo sapiens OX=9606 GN=PRNP PE=3 SV=2;tr|Q86XR1|Q86XR1\_HUMAN Major prion pr  
OS=Homo sapiens OX=9606 GN=KRT1 PE=3 SV=1;tr|H6VRG0|H6VRG0\_HUMAN Cytokeratin-1 OS=H  
-3-phosphate dehydrogenase OS=Homo sapiens OX=9606 GN=GAPDH PE=1 SV=1;sp|P04406-2|G3P  
tone H2A OS=Homo sapiens OX=9606 PE=3 SV=1;sp|Q96KK5|H2A1H\_HUMAN Histone H2A type 1-H  
of Amyloid-beta precursor protein OS=Homo sapiens OX=9606 GN=APP;sp|P05067|A4\_HUMAN Amy

4, highly similar to Homo sapiens serpin peptidase inhibitor, clade B (ovalbumin), member 2 (SERPINI  
in peptidase inhibitor, clade E (Nexin, plasminogen activator inhibitor type 1), member 1, isoform CF  
in peptidase inhibitor clade G member 1 OS=Homo sapiens OX=9606 GN=SERPING1 PE=2 SV=1;sp|P  
osomal protein, large, P2, isoform CRA\_a OS=Homo sapiens OX=9606 GN=RPLP2 PE=3 SV=1;sp|P0538  
=Homo sapiens OX=9606 GN=ITGB1 PE=1 SV=2;sp|P05556-2|ITB1\_HUMAN Isoform 2 of Integrin be  
o sapiens OX=9606 GN=GSN PE=1 SV=1;sp|P06396-2|GELS\_HUMAN Isoform 2 of Gelsolin OS=Homo  
OS=Homo sapiens OX=9606 PE=2 SV=1;sp|P06702|S10A9\_HUMAN Protein S100-A9 OS=Homo sapie  
(Fragment) OS=Homo sapiens OX=9606 GN=S100A6 PE=1 SV=1;sp|P06703|S10A6\_HUMAN Protein S  
S=Homo sapiens OX=9606 GN=ENO1 PE=1 SV=2;tr|A0A024R4F1|A0A024R4F1\_HUMAN 2-phospho-L  
cose-6-phosphate isomerase OS=Homo sapiens OX=9606 GN=GPI PE=1 SV=1;sp|P06744-2|G6PI\_HU  
eophosmin (Fragment) OS=Homo sapiens OX=9606 GN=NPM1 PE=2 SV=1;sp|P06748-2|NPM\_HUM/  
ropomyosin alpha-3 chain OS=Homo sapiens OX=9606 GN=TPM3;tr|A0A087WWU8|A0A087WWU8\_  
96, highly similar to Glia-derived nexin OS=Homo sapiens OX=9606 PE=2 SV=1;tr|A0A024R498|A0AC  
actate dehydrogenase OS=Homo sapiens OX=9606 GN=LDHB PE=1 SV=1;sp|P07195|LDHB\_HUMAN L  
-isomerase OS=Homo sapiens OX=9606 GN=P4HB PE=1 SV=3;tr|A0A024R8S5|A0A024R8S5\_HUMAN  
Homo sapiens OX=9606 GN=CTSD PE=1 SV=1;tr|V9HWI3|V9HWI3\_HUMAN Cathepsin D OS=Homo si  
=Homo sapiens OX=9606 GN=ANXA2 PE=1 SV=2;tr|A0A024R5Z7|A0A024R5Z7\_HUMAN Annexin OS=  
iant Gaucher disease and variant metachromatic leukodystrophy) variant (Fragment) OS=Homo sapie  
S=Homo sapiens OX=9606 GN=CTSL PE=1 SV=1;tr|B3KQK4|B3KQK4\_HUMAN cDNA FLJ90619 fis, clo  
omo sapiens OX=9606 GN=PFN1 PE=1 SV=2;tr|K7EJ44|K7EJ44\_HUMAN Profilin OS=Homo sapiens O  
-Homo sapiens OX=9606 GN=CTSB PE=1 SV=3;tr|A0A024R374|A0A024R374\_HUMAN Cathepsin B OS=  
t beta-1 OS=Homo sapiens OX=9606 GN=LAMB1 PE=1 SV=2;tr|G3XAI2|G3XAI2\_HUMAN Laminin suk  
-1 OS=Homo sapiens OX=9606 GN=THBS1 PE=1 SV=2;sp|P07996-2|TSP1\_HUMAN Isoform 2 of Thror  
t shock protein 90kDa alpha (Cytosolic), class B member 1, isoform CRA\_a OS=Homo sapiens OX=960  
chain (Fragment) OS=Homo sapiens OX=9606 PE=2 SV=1;tr|A4D1W7|A4D1W7\_HUMAN Activin bet  
ollagen, type IV, alpha 2, isoform CRA\_a OS=Homo sapiens OX=9606 GN=COL4A2 PE=4 SV=1;sp|P085  
patocyte growth factor receptor OS=Homo sapiens OX=9606 GN=MET;sp|P08581|MET\_HUMAN He  
gment) OS=Homo sapiens OX=9606 PE=2 SV=1;sp|P08670|VIME\_HUMAN Vimentin OS=Homo sapie  
Homo sapiens OX=9606 GN=HEL-S-7 PE=2 SV=1;sp|P08758|ANXA5\_HUMAN Annexin A5 OS=Homo s  
OS=Homo sapiens OX=9606 GN=GSTP1 PE=1 SV=1;tr|V9HWE9|V9HWE9\_HUMAN GST class-pi OS=Hc

lectin OS=Homo sapiens OX=9606 PE=2 SV=1;sp|P09382|LEG1\_HUMAN Galectin-1 OS=Homo sapier  
sapiens OX=9606 GN=SPARC PE=1 SV=1;tr|D3DQH8|D3DQH8\_HUMAN Osteonectin OS=Homo sapie  
C1s subcomponent OS=Homo sapiens OX=9606 GN=C1S PE=1 SV=1;tr|A0A087X232|A0A087X232\_H  
ariant (Fragment) OS=Homo sapiens OX=9606 PE=2 SV=1;sp|P62979|RS27A\_HUMAN Ubiquitin-40S  
tein SET OS=Homo sapiens OX=9606 GN=SET;tr|A0A0C4DFV9|A0A0C4DFV9\_HUMAN Protein SET OS

: shock 70 kDa protein 1B OS=Homo sapiens OX=9606 GN=HSPA1B PE=1 SV=1;sp|P0DMV8|HS71A\_HUMAN  
 :Homo sapiens OX=9606 GN=HEL-S-72 PE=2 SV=1;sp|P0DP23|CALM1\_HUMAN Calmodulin-1 OS=Homo sapiens  
 eceptor-type tyrosine-protein phosphatase F OS=Homo sapiens OX=9606 GN=PTPRF;sp|P10586|PTPRF\_HUMAN  
 :Homo sapiens OX=9606 GN=TXN PE=1 SV=3;tr|H9ZYJ2|H9ZYJ2\_HUMAN Thioredoxin OS=Homo sapiens  
 lum chaperone BiP OS=Homo sapiens OX=9606 GN=HSPA5 PE=1 SV=2;tr|V9HWB4|V9HWB4\_HUMAN  
 inin, gamma 1 (Formerly LAMB2), isoform CRA\_a OS=Homo sapiens OX=9606 GN=LAMC1 PE=4 SV=1  
 rate 71 kDa protein OS=Homo sapiens OX=9606 GN=HSPA8 PE=1 SV=1;tr|V9HW22|V9HW22\_HUMAN  
 gen alpha-1(VI) chain OS=Homo sapiens OX=9606 GN=COL6A1 PE=1 SV=1;tr|A0A384P5H7|A0A384P5H7\_HUMAN  
 a-actinin cytoskeletal isoform OS=Homo sapiens OX=9606 GN=ACTN1 PE=2 SV=1;sp|P12814|ACTN1\_HUMAN  
 adherin OS=Homo sapiens OX=9606 GN=CDH1 PE=2 SV=1;tr|D3XNU5|D3XNU5\_HUMAN E-cadherin  
 rama-inducible protein 30 preproprotein OS=Homo sapiens OX=9606 PE=2 SV=1;tr|A8K686|A8K686\_HUMAN  
 didymis secretory sperm binding protein OS=Homo sapiens OX=9606 PE=2 SV=1;tr|B4DPU3|B4DPU3\_HUMAN  
 :ein disulfide-isomerase A4 OS=Homo sapiens OX=9606 GN=ERP70 PE=2 SV=1;sp|P13667|PDIA4\_HUMAN  
 controlled tumor protein OS=Homo sapiens OX=9606 GN=TPT1 PE=1 SV=1;tr|E9PJF7|E9PJF7\_HUMAN  
 cretory protein Li 37 OS=Homo sapiens OX=9606 GN=HEL-S-37 PE=2 SV=1;tr|Q53FI1|Q53FI1\_HUMAN  
 359 glycoprotein OS=Homo sapiens OX=9606 GN=CD59;tr|E9PNW4|E9PNW4\_HUMAN CD59 glycoprotein  
 ein kinase C substrate 80K-H isoform 4 (Fragment) OS=Homo sapiens OX=9606 GN=PRKCSH PE=2 SV=1  
 dogen-1 OS=Homo sapiens OX=9606 GN=NID1;sp|P14543|NID1\_HUMAN Nidogen-1 OS=Homo sapiens  
 PKM OS=Homo sapiens OX=9606 GN=PKM PE=1 SV=4;tr|V9HWB8|V9HWB8\_HUMAN Pyruvate kinase  
 :cretory sperm binding protein OS=Homo sapiens OX=9606 GN=TRA1 PE=2 SV=1;tr|V9HWP2|V9HWP2\_HUMAN  
 fis, clone ASTRO2015185, highly similar to POLIOVIRUS RECEPTOR OS=Homo sapiens OX=9606 PE=2 SV=1  
 '328, highly similar to Beta-1,4-galactosyltransferase 1 OS=Homo sapiens OX=9606 PE=2 SV=1;tr|B7Z  
 ., highly similar to Ezrin OS=Homo sapiens OX=9606 PE=2 SV=1;tr|V9HW42|V9HW42\_HUMAN Epididymal  
 =Homo sapiens OX=9606 GN=AREG PE=1 SV=2;tr|D6RFX5|D6RFX5\_HUMAN Amphiregulin OS=Homo sapiens  
 alloproteinase inhibitor 2 OS=Homo sapiens OX=9606 GN=TIMP2 PE=3 SV=1;tr|A0A140VK57|A0A140VK57\_HUMAN  
 =Homo sapiens OX=9606 GN=CD44 PE=1 SV=3;sp|P16070-8|CD44\_HUMAN Isoform 8 of CD44 antigen  
 : of Integrin beta-4 OS=Homo sapiens OX=9606 GN=ITGB4;tr|Q59H46|Q59H46\_HUMAN Integrin beta-4  
 OS=Homo sapiens OX=9606 PE=2 SV=1;tr|A0A024QZN4|A0A024QZN4\_HUMAN Metavinculin  
 :rate mutase (Fragment) OS=Homo sapiens OX=9606 GN=PGAM1 PE=2 SV=1;tr|Q6FHK8|Q6FHK8\_HUMAN  
 statin OS=Homo sapiens OX=9606 GN=FST;tr|A0A024QZU6|A0A024QZU6\_HUMAN Follistatin, isoform 1  
 OS=Homo sapiens OX=9606 GN=EFNA1 PE=1 SV=2;tr|B2R7U1|B2R7U1\_HUMAN Ephrin RBD domain-containing  
 lomo sapiens OX=9606 GN=FLNA PE=2 SV=1;sp|P21333|FLNA\_HUMAN Filamin-A OS=Homo sapiens  
 ent) OS=Homo sapiens OX=9606 GN=MDK PE=1 SV=1;sp|P21741|MK\_HUMAN Midkine OS=Homo sapiens  
 io sapiens OX=9606 GN=BGN PE=1 SV=2;tr|B4DNL4|B4DNL4\_HUMAN Biglycan OS=Homo sapiens OX=9606  
 2, highly similar to CD9 antigen OS=Homo sapiens OX=9606 PE=2 SV=1;tr|A6NNI4|A6NNI4\_HUMAN  
 Cadherin-3 OS=Homo sapiens OX=9606 GN=CDH3;sp|P22223|CADH3\_HUMAN Cadherin-3 OS=Homo sapiens  
 nucleoside diphosphate kinase B OS=Homo sapiens OX=9606 GN=NME2;tr|Q32Q12|Q32Q12\_HUMAN  
 omo sapiens OX=9606 GN=SPRR1B PE=1 SV=2;tr|Q2I377|Q2I377\_HUMAN Small proline rich protein  
 r factor-binding protein 4 OS=Homo sapiens OX=9606 GN=IGFBP4 PE=1 SV=2;tr|A0A024R1U8|A0A024R1U8\_HUMAN  
 :Homo sapiens OX=9606 PE=2 SV=1;sp|P23142-4|FBLN1\_HUMAN Isoform C of Fibulin-1 OS=Homo sapiens  
 iX2A of Integrin alpha-6 OS=Homo sapiens OX=9606 GN=ITGA6;sp|P23229-2|ITA6\_HUMAN Isoform 2 of  
 lyl cis-trans isomerase OS=Homo sapiens OX=9606 GN=HEL-S-39 PE=2 SV=1;sp|P23284|PIIB\_HUMAN  
 scale isoform OS=Homo sapiens OX=9606 GN=CFL1 PE=1 SV=1;tr|E9PP50|E9PP50\_HUMAN Cofilin, non-phosphorylated  
 no sapiens OX=9606 GN=TNC PE=1 SV=3;sp|P24821-3|TENA\_HUMAN Isoform 3 of Tenascin OS=Homo sapiens  
 oteasome subunit alpha type-3 OS=Homo sapiens OX=9606 GN=PSMA3;tr|Q6IB71|Q6IB71\_HUMAN  
 oteasome subunit alpha type-4 OS=Homo sapiens OX=9606 GN=PSMA4;tr|H0YN18|H0YN18\_HUMAN  
 3 isoform b, variant (Fragment) OS=Homo sapiens OX=9606 PE=2 SV=1;tr|B4E0H8|B4E0H8\_HUMAN

iminal protein 70 OS=Homo sapiens OX=9606 GN=HEL70 PE=2 SV=1;sp|P26038|MOES\_HUMAN Mo  
 riant (Fragment) OS=Homo sapiens OX=9606 PE=2 SV=1;tr|V9HW88|V9HW88\_HUMAN Calreticulin  
 eptor type 2 OS=Homo sapiens OX=9606 GN=IL1R2 PE=1 SV=1;sp|P27930-2|IL1R2\_HUMAN Isoform  
 ubunit alpha type OS=Homo sapiens OX=9606 PE=2 SV=1;tr|A0A109NGN6|A0A109NGN6\_HUMAN F  
 omo sapiens OX=9606 GN=GRN PE=1 SV=2;tr|B4DJI2|B4DJI2\_HUMAN cDNA FLJ53342, highly similar  
 ! OS=Homo sapiens OX=9606 GN=S100A2 PE=1 SV=3;tr|R4GN49|R4GN49\_HUMAN Protein S100-A2  
 :phrin type-A receptor 2 OS=Homo sapiens OX=9606 GN=EPHA2;tr|A0A024QZA8|A0A024QZA8\_HUM  
 uminal protein 107 OS=Homo sapiens OX=9606 GN=HEL107 PE=2 SV=1;tr|Q53EM5|Q53EM5\_HUMA  
 tory protein Li 34 OS=Homo sapiens OX=9606 GN=HEL-S-34 PE=2 SV=1;sp|P30086|PEBP1\_HUMAN P  
 de-isomerase OS=Homo sapiens OX=9606 PE=2 SV=1;tr|B3KQT2|B3KQT2\_HUMAN Protein disulfide-  
 cinase receptor UFO OS=Homo sapiens OX=9606 GN=AXL PE=1 SV=4;sp|P30530-2|UFO\_HUMAN Isof  
 ndecan-4 OS=Homo sapiens OX=9606 GN=SDC4;sp|P31431|SDC4\_HUMAN Syndecan-4 OS=Homo sa  
 3, highly similar to Heterogeneous nuclear ribonucleoprotein H OS=Homo sapiens OX=9606 PE=2 SV=  
 of 14-3-3 protein beta/alpha OS=Homo sapiens OX=9606 GN=YWHAB;tr|V9HWD6|V9HWD6\_HUMA  
 igma OS=Homo sapiens OX=9606 GN=SFN PE=1 SV=1;sp|P31947-2|1433S\_HUMAN Isoform 2 of 14-3-  
 ) OS=Homo sapiens OX=9606 GN=HEL-S-43 PE=2 SV=1;tr|B2R5H0|B2R5H0\_HUMAN Protein S100 OS  
 Neural cell adhesion molecule L1 OS=Homo sapiens OX=9606 GN=L1CAM;sp|P32004-2|L1CAM\_HUN  
 pican-1 OS=Homo sapiens OX=9606 PE=2 SV=1;sp|P35052|GPC1\_HUMAN Glypican-1 OS=Homo sapi

-2 OS=Homo sapiens OX=9606 GN=THBS2 PE=1 SV=2;tr|A0A3B3ITK0|A0A3B3ITK0\_HUMAN Thrombo  
 mo sapiens OX=9606 GN=FBN2 PE=1 SV=3;tr|D6RJ13|D6RJ13\_HUMAN Fibrillin-2 OS=Homo sapiens O  
 osin, heavy polypeptide 9, non-muscle, isoform CRA\_a OS=Homo sapiens OX=9606 GN=MYH9 PE=3 S  
 in peptidase inhibitor, clade B (Ovalbumin), member 5, isoform CRA\_b OS=Homo sapiens OX=9606 C  
 agment) OS=Homo sapiens OX=9606 GN=TAGLN2 PE=1 SV=1;tr|A0A384MTL2|A0A384MTL2\_HUMAI  
 e XVIII, alpha 1, isoform CRA\_d OS=Homo sapiens OX=9606 GN=COL18A1 PE=4 SV=1;sp|P39060-2|C  
 drogenase OS=Homo sapiens OX=9606 GN=HEL-S-32 PE=2 SV=1;sp|P40925|MDHC\_HUMAN Malate  
 in (Fragment) OS=Homo sapiens OX=9606 GN=IQGAP1 PE=2 SV=1;tr|A0A0J9YXZ5|A0A0J9YXZ5\_HUN  
 g protein subunit beta OS=Homo sapiens OX=9606 GN=CAPZB PE=1 SV=1;tr|B1AK85|B1AK85\_HUMA  
 e factor pathway inhibitor 2 (Fragment) OS=Homo sapiens OX=9606 PE=2 SV=1;sp|P48307-2|TFPI2\_  
 e OS=Homo sapiens OX=9606 GN=FASN PE=1 SV=3;tr|A0A0U1RQF0|A0A0U1RQF0\_HUMAN 3-hydro  
 i OS=Homo sapiens OX=9606 GN=VEGFC PE=2 SV=1;sp|P49767|VEGFC\_HUMAN Vascular endothelia  
 ciation inhibitor (Fragment) OS=Homo sapiens OX=9606 GN=GDI2 PE=1 SV=1;sp|P50395-2|GDIB\_HU  
 ion molecule OS=Homo sapiens OX=9606 GN=BCAM PE=1 SV=2;tr|A0A068W6H0|A0A068W6H0\_HU  
 ation inhibitor 1 (Fragment) OS=Homo sapiens OX=9606 GN=ARHGDI1 PE=1 SV=8;tr|V9HWE8|V9HW

lase 1 OS=Homo sapiens OX=9606 GN=CTSC PE=1 SV=2;tr|B4DJQ8|B4DJQ8\_HUMAN Cathepsin C OS  
 Microfibrillar-associated protein 2 OS=Homo sapiens OX=9606 GN=MFAP2;sp|P55001-2|MFAP2\_HU  
 sfer protein OS=Homo sapiens OX=9606 GN=PLTP PE=1 SV=1;tr|B3KUE5|B3KUE5\_HUMAN Phospho  
 ument) OS=Homo sapiens OX=9606 GN=VCP PE=2 SV=2;tr|V9HW80|V9HW80\_HUMAN 15S Mg(2+)-  
 astrocyte-derived neurotrophic factor OS=Homo sapiens OX=9606 GN=MANF PE=1 SV=3;tr|A8K878|

Cadherin-13 OS=Homo sapiens OX=9606 GN=CDH13;sp|P55290|CAD13\_HUMAN Cadherin-13 OS=Hc  
 Homo sapiens OX=9606 GN=CD81 PE=1 SV=1;tr|E9PRJ8|E9PRJ8\_HUMAN Tetraspanin (Fragment) O  
 e isomerase OS=Homo sapiens OX=9606 PE=2 SV=1;tr|V9HWK1|V9HWK1\_HUMAN Triosephosphate  
 unit alpha type OS=Homo sapiens OX=9606 GN=PSMA6 PE=1 SV=1;tr|G3V295|G3V295\_HUMAN Pro  
 bulin OS=Homo sapiens OX=9606 GN=B2M PE=1 SV=1;tr|B4E0X1|B4E0X1\_HUMAN Beta-2-microglob  
 cretory protein E1 (Fragment) OS=Homo sapiens OX=9606 PE=2 SV=1;tr|A0A024R6C0|A0A024R6C0\_  
 gamma OS=Homo sapiens OX=9606 GN=YWHAG PE=1 SV=2;tr|B3KNB4|B3KNB4\_HUMAN cDNA FLJ1  
 epsilon OS=Homo sapiens OX=9606 GN=YWHAE PE=1 SV=1;tr|V9HW98|V9HW98\_HUMAN Epididymi  
 i OS=Homo sapiens OX=9606 GN=TMSB4X PE=2 SV=1;sp|P62328|TYB4\_HUMAN Thymosin beta-4 OS



=Homo sapiens OX=9606 GN=HIST1H4H PE=2 SV=1;tr|B2R4R0|B2R4R0\_HUMAN Histone H4 OS=Homo sapiens  
 -trans isomerase A OS=Homo sapiens OX=9606 GN=PPIA PE=1 SV=2;tr|A8K486|A8K486\_HUMAN Pe  
 is-trans isomerase FKBP1A OS=Homo sapiens OX=9606 GN=FKBP1A PE=1 SV=2;tr|Q5W0X3|Q5W0X3\_HUMAN  
 inal protein 4 OS=Homo sapiens OX=9606 GN=YWHAZ PE=2 SV=1;sp|P63104|1433Z\_HUMAN 14-3-3  
 36, highly similar to Actin, cytoplasmic 2 OS=Homo sapiens OX=9606 PE=2 SV=1;tr|B4E3A4|B4E3A4\_HUMAN  
 10 OS=Homo sapiens OX=9606 GN=TMSB10 PE=1 SV=2;tr|D6W5K2|D6W5K2\_HUMAN Thymosin, be  
 yrosine-protein phosphatase non-receptor type substrate 1 OS=Homo sapiens OX=9606 GN=SIRPA;S  
 OS=Homo sapiens OX=9606 GN=JAG1 PE=1 SV=3;tr|B2R6U9|B2R6U9\_HUMAN Delta-like protein OS=Homo sapiens  
 inase-associated lipocalin OS=Homo sapiens OX=9606 GN=LCN2 PE=1 SV=2;tr|B2ZDQ1|B2ZDQ1\_HUMAN  
 2 OS=Homo sapiens OX=9606 GN=NUCB2 PE=1 SV=2;sp|P80303-2|NUCB2\_HUMAN Isoform 2 of Nuc  
 lomo sapiens OX=9606 GN=FBLN2 PE=2 SV=1;sp|P98095|FBLN2\_HUMAN Fibulin-2 OS=Homo sapiens



CD109 antigen OS=Homo sapiens OX=9606 GN=CD109;sp|Q6YHK3|CD109\_HUMAN CD109 antigen C  
 ! fis, clone HLUNG2001507, highly similar to Amphoterin-induced protein 2 OS=Homo sapiens OX=96  
 olysis-stimulated lipoprotein receptor OS=Homo sapiens OX=9606 GN=LSR;sp|Q86X29-5|LSR\_HUMA  
 ncer-binding protein 1 OS=Homo sapiens OX=9606 GN=AEBP1 PE=1 SV=1;tr|B4DJB3|B4DJB3\_HUMA  
 Extracellular sulfatase Sulf-2 OS=Homo sapiens OX=9606 GN=SULF2;sp|Q8IWU5|SULF2\_HUMAN Ext  
 vertase subtilisin/kexin type 9 OS=Homo sapiens OX=9606 GN=PCSK9 PE=1 SV=3;tr|A0A669KBG0|AC  
 , highly similar to Programmed cell death 6-interacting protein OS=Homo sapiens OX=9606 PE=2 SV=  
 OS=Homo sapiens OX=9606 GN=FAM3C PE=1 SV=1;tr|C9JP35|C9JP35\_HUMAN Protein FAM3C (Fra  
 nolog OS=Homo sapiens OX=9606 GN=PXD1 PE=1 SV=2;tr|H7C1W1|H7C1W1\_HUMAN Peroxidase h  
 e HTRA1 OS=Homo sapiens OX=9606 GN=HTRA1 PE=1 SV=1;tr|Q05DJ8|Q05DJ8\_HUMAN HTRA1 prot  
 Neuronal cell adhesion molecule OS=Homo sapiens OX=9606 GN=NRCAM;sp|Q92823-3|NRCAM\_HI  
 ; protein 1 OS=Homo sapiens OX=9606 GN=GLG1 PE=1 SV=2;sp|Q92896-3|GSLG1\_HUMAN Isoform  
 ide-3-kinase-interacting protein 1 (Fragment) OS=Homo sapiens OX=9606 GN=PIK3IP1 PE=1 SV=8;sp  
 lycase OS=Homo sapiens OX=9606 GN=HEL-S-67p PE=2 SV=1;sp|Q99497|PARK7\_HUMAN Parkinson  
 lopeptidase OS=Homo sapiens OX=9606 PE=2 SV=1;tr|Q6I9U9|Q6I9U9\_HUMAN Asparaginyl endope  
 Collagen alpha-1(XII) chain OS=Homo sapiens OX=9606 GN=COL12A1;tr|D6RGG3|D6RGG3\_HUMAN  
 OS=Homo sapiens OX=9606 GN=SEMA3C PE=2 SV=2;tr|B4E2I9|B4E2I9\_HUMAN Semaphorin-3C OS  
 edoxin domain-containing protein 17 OS=Homo sapiens OX=9606 PE=2 SV=1;sp|Q9BRA2|TXD17\_HU  
 45 kDa calcium-binding protein OS=Homo sapiens OX=9606 GN=SDF4;tr|G3V1E2|G3V1E2\_HUMAN 4  
 Tubulointerstitial nephritis antigen-like OS=Homo sapiens OX=9606 GN=TINAGL1;sp|Q9GZM7|TINAL  
 nding glutamic acid-rich-like protein 3 OS=Homo sapiens OX=9606 GN=SH3BGR1 PE=1 SV=1;tr|Q86Z  
 Semaphorin-4B OS=Homo sapiens OX=9606 GN=SEMA4B;sp|Q9NPR2|SEM4B\_HUMAN Semaphorin  
 OS=Homo sapiens OX=9606 GN=TENM2 PE=1 SV=1;sp|Q9NT68-2|TEN2\_HUMAN Isoform 2 of Teneurin  
 ed protein CRIM1 (Fragment) OS=Homo sapiens OX=9606 GN=CRIM1 PE=4 SV=1;sp|Q9NZV1|CRIM1  
 receptor negative regulator OS=Homo sapiens OX=9606 GN=PTGFRN PE=1 SV=2;tr|Q1WWL2|Q1WW  
 l protein 3 OS=Homo sapiens OX=9606 GN=DKK3 PE=1 SV=2;tr|F6SYF8|F6SYF8\_HUMAN Dickkopf-re  
 S=Homo sapiens OX=9606 PE=2 SV=1;sp|Q9UBR2|CATZ\_HUMAN Cathepsin Z OS=Homo sapiens OX:  
 se A4 OS=Homo sapiens OX=9606 GN=CPA4 PE=1 SV=1;sp|Q9UI42-2|CBPA4\_HUMAN Isoform 2 of C  
 f Collagen alpha-1(XVII) chain OS=Homo sapiens OX=9606 GN=COL17A1;tr|D3DRA2|D3DRA2\_HUM/  
 ein C receptor OS=Homo sapiens OX=9606 GN=PROCR PE=1 SV=1;tr|A0A0U1RQQ4|A0A0U1RQQ4\_I  
 krein-related peptidase 5 transcript variant 5 OS=Homo sapiens OX=9606 GN=KLK5 PE=2 SV=1;tr|A0  
 omolog OS=Homo sapiens OX=9606 GN=LOXL2 PE=2 SV=1;sp|Q9Y4K0|LOXL2\_HUMAN Lysyl oxidase  
 umorigenicity 14 protein homolog OS=Homo sapiens OX=9606 PE=2 SV=1;sp|Q9Y5Y6|ST14\_HUMAN  
 esion molecule 1 OS=Homo sapiens OX=9606 GN=F11R PE=3 SV=1;tr|Q6FIB4|Q6FIB4\_HUMAN Junc  
 onectin OS=Homo sapiens OX=9606 GN=FN1 PE=4 SV=1;tr|B7ZLE5|B7ZLE5\_HUMAN Fibronectin OS=  
 0 protein 9 (Fragment) OS=Homo sapiens OX=9606 GN=KLK10 PE=2 SV=1;tr|A0A024R4N7|A0A024R  
 ascin C (Hexabrachion), isoform CRA\_a OS=Homo sapiens OX=9606 GN=TNC PE=3 SV=1;tr|Q4LE33|Q  
 aran sulfate proteoglycan 2 (Perlecan), isoform CRA\_b OS=Homo sapiens OX=9606 GN=HSPG2 PE=4  
 olony-stimulating factor (Fragment) OS=Homo sapiens OX=9606 GN=CSF3 PE=2 SV=1;tr|A0A0B4U5E  
 class I antigen OS=Homo sapiens OX=9606 GN=HLA-C PE=3 SV=1;tr|A0A0S4T3H1|A0A0S4T3H1\_HUI  
 )|A0A0S4XRM0\_HUMAN;tr|A0A0U5PUM0|A0A0U5PUM0\_HUMAN;tr|A0A6B9VT42|A0A6B9VT42\_H

rionectin OS=Homo sapiens OX=9606 PE=2 SV=1;sp|P02751-10|FINC\_HUMAN Isoform 10 of Fibrone  
 ubcomponent C1r OS=Homo sapiens OX=9606 GN=C1R PE=1 SV=3;tr|Q53HU9|Q53HU9\_HUMAN Cc  
 l, highly similar to Homo sapiens desmocollin type 4 OS=Homo sapiens OX=9606 PE=2 SV=1  
 A E1 OS=Homo sapiens OX=9606 GN=RNASE7 PE=3 SV=1;tr|A8K9I2|A8K9I2\_HUMAN cDNA FLJ75277

, highly similar to Matrix metalloproteinase-9 (EC3.4.24.35) OS=Homo sapiens OX=9606 PE=2 SV=1;s

plasminogen activator OS=Homo sapiens OX=9606 GN=PLAU PE=1 SV=1;tr|Q5PY49|Q5PY49\_HUMA  
rtigen (Fragment) OS=Homo sapiens OX=9606 GN=HLA-C PE=3 SV=1;tr|F6IQL9|F6IQL9\_HUMAN MH  
elial growth factor A (Fragment) OS=Homo sapiens OX=9606 GN=VEGFA PE=1 SV=1;sp|P15692-2|VE  
issue growth factor OS=Homo sapiens OX=9606 GN=CTGF PE=2 SV=1;tr|B3KRV6|B3KRV6\_HUMAN cl

I Low density lipoprotein receptor (Fragment) OS=Homo sapiens OX=9606 GN=LDLR PE=4 SV=1;tr|J3  
sapiens OX=9606 GN=INS PE=1 SV=1;tr|I3WAC9|I3WAC9\_HUMAN Insulin OS=Homo sapiens OX=960  
MAN Immunoglobulin kappa constant (Fragment) OS=Homo sapiens OX=9606 GN=IGKC PE=1 SV=1;tr|  
PE=2 SV=1;sp|P01876|IGHA1\_HUMAN Immunoglobulin heavy constant alpha 1 OS=Homo sapiens O  
Collagen alpha-1(IV) chain (Fragment) OS=Homo sapiens OX=9606 GN=COL4A1 PE=1 SV=1;tr|A0A6G9  
is secretory sperm binding protein OS=Homo sapiens OX=9606 PE=2 SV=1;sp|P02545-6|LMNA\_HUN  
DE\_HUMAN Apolipoprotein E OS=Homo sapiens OX=9606 GN=APOE PE=1 SV=1;tr|A0A346DBY2|A0A

Homo sapiens OX=9606 GN=FN1;sp|P02751-11|FINC\_HUMAN Isoform 11 of Fibronectin OS=Homo sapiens  
Gc-globulin OS=Homo sapiens OX=9606 GN=GC;tr|V9HWI6|V9HWI6\_HUMAN

HUMAN Matrix metalloproteinase 1 preproprotein variant (Fragment) OS=Homo sapiens OX=9606 PE=1 SV=1;tr|J3KP  
HUMAN Fructose-bisphosphate aldolase OS=Homo sapiens OX=9606 GN=HEL-S-87p PE=2 SV=1;tr|J3KP  
iens OX=9606 GN=CSTB PE=1 SV=2;tr|A0A1W2PS52|A0A1W2PS52\_HUMAN Cystatin-B OS=Homo sa  
iens OX=9606 GN=ANXA1 PE=2 SV=1;tr|A0A4D5RAI5|A0A4D5RAI5\_HUMAN Annexin OS=Homo sapi  
rotein (Fragment) OS=Homo sapiens OX=9606 GN=PRNP PE=3 SV=1;tr|Q6SES1|Q6SES1\_HUMAN Maj  
omo sapiens OX=9606 GN=KRT1 PE=3 SV=1;tr|H6VRF9|H6VRF9\_HUMAN Cytokeratin-1 OS=Homo sa  
\_HUMAN Isoform 2 of Glyceraldehyde-3-phosphate dehydrogenase OS=Homo sapiens OX=9606 GN=  
| OS=Homo sapiens OX=9606 GN=H2AC12 PE=1 SV=3;sp|P04908|H2A1B\_HUMAN Histone H2A type  
oid-beta precursor protein OS=Homo sapiens OX=9606 GN=APP PE=1 SV=3;sp|P05067-11|A4\_HUM

32), mRNA OS=Homo sapiens OX=9606 PE=2 SV=1;sp|P05120|PAI2\_HUMAN Plasminogen activator i  
A\_b OS=Homo sapiens OX=9606 GN=SERPINE1 PE=3 SV=1;sp|P05121|PAI1\_HUMAN Plasminogen a  
P05155-2|IC1\_HUMAN Isoform 2 of Plasma protease C1 inhibitor OS=Homo sapiens OX=9606 GN=SE  
37|RLA2\_HUMAN 60S acidic ribosomal protein P2 OS=Homo sapiens OX=9606 GN=RPLP2 PE=1 SV=1  
ta-1 OS=Homo sapiens OX=9606 GN=ITGB1;sp|P05556-5|ITB1\_HUMAN Isoform 5 of Integrin beta-1  
sapiens OX=9606 GN=GSN;tr|A0A384MEF1|A0A384MEF1\_HUMAN Actin-depolymerizing factor OS=

100-A6 OS=Homo sapiens OX=9606 GN=S100A6 PE=1 SV=1;tr|B2R577|B2R577\_HUMAN Protein S10  
D-glycerate hydro-lyase OS=Homo sapiens OX=9606 GN=HEL-S-17 PE=2 SV=1;tr|A0A2R8Y6G6|A0A2F  
MAN Isoform 2 of Glucose-6-phosphate isomerase OS=Homo sapiens OX=9606 GN=GPI;tr|A0A1W6A  
AN Isoform 2 of Nucleophosmin OS=Homo sapiens OX=9606 GN=NPM1;tr|A0A0S2Z491|A0A0S2Z491  
\_HUMAN Tropomyosin alpha-3 chain OS=Homo sapiens OX=9606 GN=TPM3 PE=1 SV=1;sp|P06753-2  
124R498\_HUMAN Serpin peptidase inhibitor, clade E (Nexin, plasminogen activator inhibitor type 1),  
-lactate dehydrogenase B chain OS=Homo sapiens OX=9606 GN=LDHB PE=1 SV=2;tr|Q5U077|Q5U0  
I Protein disulfide-isomerase OS=Homo sapiens OX=9606 GN=P4HB PE=2 SV=1;tr|H7BZ94|H7BZ94\_H  
apiens OX=9606 GN=HEL-S-130P PE=2 SV=1;tr|A0A1B0GWE8|A0A1B0GWE8\_HUMAN Cathepsin D O  
Homo sapiens OX=9606 GN=ANXA2 PE=2 SV=1;tr|V9HW65|V9HW65\_HUMAN Annexin OS=Homo sa  
ens OX=9606 PE=2 SV=1;tr|A0A024QZQ2|A0A024QZQ2\_HUMAN Prosaposin (Variant Gaucher disea  
ne PLACE1002374, highly similar to Cathepsin L OS=Homo sapiens OX=9606 PE=2 SV=1;tr|A5PLM9|A

=Homo sapiens OX=9606 GN=CTSB PE=2 SV=1;tr|B4DL49|B4DL49\_HUMAN Cathepsin B OS=Homo sa  
unit beta-1 OS=Homo sapiens OX=9606 GN=LAMB1 PE=1 SV=1;tr|Q8TAS6|Q8TAS6\_HUMAN LAMB1

16 GN=HSP90AB1 PE=3 SV=1;sp|P08238|HS90B\_HUMAN Heat shock protein HSP 90-beta OS=Homo  
a-A chain OS=Homo sapiens OX=9606 GN=INHBA PE=2 SV=1;sp|P08476|INHBA\_HUMAN Inhibin bet  
72|CO4A2\_HUMAN Collagen alpha-2(IV) chain OS=Homo sapiens OX=9606 GN=COL4A2 PE=1 SV=4;t  
patocyte growth factor receptor OS=Homo sapiens OX=9606 GN=MET PE=1 SV=4;tr|A0A024R728|A0  
ns OX=9606 GN=VIM PE=1 SV=4;tr|B0YJC4|B0YJC4\_HUMAN Vimentin OS=Homo sapiens OX=9606 G  
sapiens OX=9606 GN=ANXA5 PE=1 SV=2;tr|E9PHT9|E9PHT9\_HUMAN Annexin OS=Homo sapiens OX=  
omo sapiens OX=9606 GN=HEL-S-22 PE=2 SV=1;sp|P09211|GSTP1\_HUMAN Glutathione S-transferase

ens OX=9606 GN=SPARC PE=3 SV=1;tr|B2RDL6|B2RDL6\_HUMAN Osteonectin OS=Homo sapiens OX=  
UMAN Complement C1s subcomponent OS=Homo sapiens OX=9606 GN=C1S PE=1 SV=1;tr|B3KNX0|  
ribosomal protein S27a OS=Homo sapiens OX=9606 GN=RPS27A PE=1 SV=2;tr|F5GXX7|F5GXX7\_HUI  
i=Homo sapiens OX=9606 GN=SET PE=1 SV=1;sp|Q01105-4|SET\_HUMAN Isoform 4 of Protein SET OS=

HUMAN Heat shock 70 kDa protein 1A OS=Homo sapiens OX=9606 GN=HSPA1A PE=1 SV=1;sp|P0DM1  
Homo sapiens OX=9606 GN=CALM1 PE=1 SV=1;sp|P0DP24|CALM2\_HUMAN Calmodulin-2 OS=Homo sa  
P2RF\_HUMAN Receptor-type tyrosine-protein phosphatase F OS=Homo sapiens OX=9606 GN=PTPRF F  
ns OX=9606 GN=TXN PE=2 SV=1;sp|P10599-2|THIO\_HUMAN Isoform 2 of Thioredoxin OS=Homo sa  
N 78 kDa glucose-regulated protein OS=Homo sapiens OX=9606 GN=HEL-S-89n PE=2 SV=1  
;sp|P11047|LAMC1\_HUMAN Laminin subunit gamma-1 OS=Homo sapiens OX=9606 GN=LAMC1 PE=  
.N Epididymis luminal protein 33 OS=Homo sapiens OX=9606 GN=HEL-S-72p PE=2 SV=1;tr|E9PKE3|E  
5H7\_HUMAN Collagen, type VI, alpha 1, isoform CRA\_b OS=Homo sapiens OX=9606 GN=COL6A1 PE=  
\_HUMAN Alpha-actinin-1 OS=Homo sapiens OX=9606 GN=ACTN1 PE=1 SV=2;sp|P12814-3|ACTN1\_H  
1 OS=Homo sapiens OX=9606 GN=CDH1 PE=4 SV=1;tr|A0A0U2ZQU7|A0A0U2ZQU7\_HUMAN E-cadh  
HUMAN cDNA FLJ77316, highly similar to Homo sapiens interferon, gamma-inducible protein 30 (IFI3  
;\_HUMAN cDNA FLJ56548, highly similar to Elongation factor 2 OS=Homo sapiens OX=9606 PE=2 SV=  
MAN Protein disulfide-isomerase A4 OS=Homo sapiens OX=9606 GN=PDIA4 PE=1 SV=2;tr|A0A499FI  
.N Translationally-controlled tumor protein (Fragment) OS=Homo sapiens OX=9606 GN=TPT1 PE=1 SV  
.N L-plastin variant (Fragment) OS=Homo sapiens OX=9606 PE=2 SV=1;tr|A0A024RDT4|A0A024RDT4  
rotein OS=Homo sapiens OX=9606 PE=1 SV=1;tr|A0A2U3TZL5|A0A2U3TZL5\_HUMAN CD59 glycoprot  
:1;tr|A2VCQ4|A2VCQ4\_HUMAN PRKCSH protein (Fragment) OS=Homo sapiens OX=9606 GN=PRKCS  
ns OX=9606 GN=NID1 PE=1 SV=3;tr|A0A384MR25|A0A384MR25\_HUMAN Epididymis secretory spe  
se OS=Homo sapiens OX=9606 GN=HEL-S-30 PE=2 SV=1;sp|P14618-2|KPYM\_HUMAN Isoform M1 of  
P2\_HUMAN Epididymis luminal protein 35 OS=Homo sapiens OX=9606 GN=HEL-S-125m PE=2 SV=1;sp  
SV=1;sp|P15151-3|PVR\_HUMAN Isoform Gamma of Poliovirus receptor OS=Homo sapiens OX=9606  
'AH9|B7ZAH9\_HUMAN cDNA, FLJ79193, highly similar to Beta-1,4-galactosyltransferase 1 OS=Homo  
lymis secretory protein Li 105 OS=Homo sapiens OX=9606 GN=HEL-S-105 PE=2 SV=1;tr|Q6NUR7|Q6

OVK57\_HUMAN Metalloproteinase inhibitor 2 OS=Homo sapiens OX=9606 PE=2 SV=1;sp|P16035|TII  
en OS=Homo sapiens OX=9606 GN=CD44;sp|P16070-5|CD44\_HUMAN Isoform 5 of CD44 antigen OS  
a (Fragment) OS=Homo sapiens OX=9606 PE=2 SV=1;sp|P16144-4|ITB4\_HUMAN Isoform Beta-4D of

ulin OS=Homo sapiens OX=9606 GN=VCL PE=3 SV=1;sp|P18206-2|VINC\_HUMAN Isoform 1 of Vincul  
JMAN Phosphoglycerate mutase OS=Homo sapiens OX=9606 GN=PGAM1 PE=2 SV=1;tr|Q53G35|Q5  
rm CRA\_c OS=Homo sapiens OX=9606 GN=FST PE=4 SV=1;sp|P19883|FST\_HUMAN Follistatin OS=Ho

aining protein OS=Homo sapiens OX=9606 PE=2 SV=1;tr|A0A384ME06|A0A384ME06\_HUMAN Epidi  
OX=9606 GN=FLNA PE=1 SV=4;sp|P21333-2|FLNA\_HUMAN Isoform 2 of Filamin-A OS=Homo sapien  
piens OX=9606 GN=MDK PE=1 SV=1;tr|E9PLM6|E9PLM6\_HUMAN Midkine OS=Homo sapiens OX=96  
OX=9606 PE=2 SV=1;tr|A8K7E0|A8K7E0\_HUMAN Biglycan OS=Homo sapiens OX=9606 PE=2 SV=1;tr|C  
Tetraspanin OS=Homo sapiens OX=9606 GN=CD9 PE=1 SV=1;tr|A0A2R8Y478|A0A2R8Y478\_HUMAN  
sapiens OX=9606 GN=CDH3 PE=1 SV=2;tr|B4DLF0|B4DLF0\_HUMAN cDNA FLJ50795, highly similar t  
N Nucleoside diphosphate kinase OS=Homo sapiens OX=9606 GN=NME1-NME2 PE=1 SV=1;tr|Q6FHN  
OS=Homo sapiens OX=9606 PE=2 SV=1;sp|P35321|SPR1A\_HUMAN Cornifin-A OS=Homo sapiens O  
24R1U8\_HUMAN Insulin-like growth factor-binding protein 4 OS=Homo sapiens OX=9606 GN=IGFBP4  
piens OX=9606 GN=FBLN1;tr|B1AHL2|B1AHL2\_HUMAN Fibulin-1 OS=Homo sapiens OX=9606 GN=FI  
Alpha-6X1A of Integrin alpha-6 OS=Homo sapiens OX=9606 GN=ITGA6;sp|P23229-5|ITA6\_HUMAN Is

on-muscle isoform (Fragment) OS=Homo sapiens OX=9606 GN=CFL1 PE=1 SV=8;sp|P23528|COF1\_HI  
no sapiens OX=9606 GN=TNC;tr|F5H7V9|F5H7V9\_HUMAN Tenascin OS=Homo sapiens OX=9606 GN

Proteasome subunit alpha type OS=Homo sapiens OX=9606 GN=PSMA3 PE=2 SV=1;tr|A0A140VK43|  
N Proteasome endopeptidase complex OS=Homo sapiens OX=9606 GN=PSMA4 PE=1 SV=1;tr|B2RDG  
cDNA FLJ60385, highly similar to Integrin alpha-3 OS=Homo sapiens OX=9606 PE=2 SV=1;tr|A0A140'

omo sapiens OX=9606 GN=CDH13 PE=1 SV=1;tr|B7Z9B1|B7Z9B1\_HUMAN Cadherin-13 OS=Homo sa  
 5=Homo sapiens OX=9606 GN=CD81 PE=1 SV=1;tr|H0YDL9|H0YDL9\_HUMAN Tetraspanin (Fragment  
 3 isomerase OS=Homo sapiens OX=9606 GN=HEL-S-49 PE=2 SV=1;tr|Q53HE2|Q53HE2\_HUMAN Trios  
 7teasome subunit alpha type OS=Homo sapiens OX=9606 GN=PSMA6 PE=1 SV=1;tr|A0A140VK44|A0  
 bulin OS=Homo sapiens OX=9606 PE=2 SV=1;tr|A6XMH4|A6XMH4\_HUMAN Beta-2-microglobulin OS  
 \_HUMAN Epididymal secretory protein E1 OS=Homo sapiens OX=9606 GN=NPC2 PE=2 SV=1;sp|P619  
 4168 fis, clone NT2RP2001440, highly similar to 14-3-3 protein gamma OS=Homo sapiens OX=9606 P  
 s luminal protein 2 OS=Homo sapiens OX=9606 GN=HEL2 PE=2 SV=1;tr|G9K389|G9K389\_HUMAN YL  
 5=Homo sapiens OX=9606 GN=TMSB4X PE=1 SV=2;tr|Q0P5T0|Q0P5T0\_HUMAN TMSB4X protein (Fra

/3X5|G3V3X5\_HUMAN Latent-transforming growth factor beta-binding protein 2 OS=Homo sapiens  
;\_HUMAN Epididymis secretory sperm binding protein OS=Homo sapiens OX=9606 PE=2 SV=1;sp|Q1  
no sapiens OX=9606 GN=PLEC;sp|Q15149-9|PLEC\_HUMAN Isoform 9 of Plectin OS=Homo sapiens O  
HUMAN Isoform Gamma of Nectin-1 OS=Homo sapiens OX=9606 GN=NECTIN1;sp|Q15223-2|NECT1\_1  
C3|B4DHC3\_HUMAN cDNA FLJ61254, highly similar to Receptor-type tyrosine-protein phosphatase k  
3I PE=2 SV=1;sp|Q15582|BGH3\_HUMAN Transforming growth factor-beta-induced protein ig-h3 OS=  
JMAN Isoform 2 of Insulin-like growth factor-binding protein 7 OS=Homo sapiens OX=9606 GN=IGFBP  
lar matrix protein 1 OS=Homo sapiens OX=9606 GN=ECM1 PE=1 SV=2;sp|Q16610-4|ECM1\_HUMAN  
X=9606 PE=2 SV=1;sp|Q16658|FSCN1\_HUMAN Fascin OS=Homo sapiens OX=9606 GN=FSCN1 PE=1  
Isoform 2 of Glutaminyl-peptide cyclotransferase OS=Homo sapiens OX=9606 GN=QPCT;tr|B5MCZ9|  
HUMAN Isoform 1 of Laminin subunit alpha-3 OS=Homo sapiens OX=9606 GN=LAMA3;sp|Q16787|LA  
J Isoform 2 of Transmembrane protein 132A OS=Homo sapiens OX=9606 GN=TMEM132A;sp|Q24JP5  
1 OS=Homo sapiens OX=9606 GN=ANXA8L1 PE=2 SV=2;tr|A0A075B752|A0A075B752\_HUMAN Anne  
2 of UL-16 binding protein 5 OS=Homo sapiens OX=9606 GN=RAET1G;sp|Q5VY80|ULBP6\_HUMAN  
4 SV=1;sp|Q6PCB0|VWA1\_HUMAN von Willebrand factor A domain-containing protein 1 OS=Homo

OS=Homo sapiens OX=9606 GN=CD109 PE=1 SV=2;sp|Q6YHK3-2|CD109\_HUMAN Isoform 2 of CD109  
06 PE=2 SV=1;tr|A0A024R127|A0A024R127\_HUMAN Adhesion molecule with Ig-like domain 2, isofo  
N Isoform 5 of Lipolysis-stimulated lipoprotein receptor OS=Homo sapiens OX=9606 GN=LSR;tr|S4R5  
N cDNA FLJ55979, highly similar to Homo sapiens AE binding protein 1 (AEBP1), mRNA OS=Homo sa

JA669KBG0\_HUMAN Proprotein convertase 9 OS=Homo sapiens OX=9606 GN=PCSK9 PE=1 SV=1  
:1;tr|B4DHD2|B4DHD2\_HUMAN cDNA FLJ55458, highly similar to Programmed cell death 6-interacti  
gment) OS=Homo sapiens OX=9606 GN=FAM3C PE=1 SV=1;tr|C9JMN4|C9JMN4\_HUMAN Protein FA  
omolog (Fragment) OS=Homo sapiens OX=9606 GN=PXD1 PE=1 SV=1;sp|Q92626-2|PXD1\_HUMAN  
tein (Fragment) OS=Homo sapiens OX=9606 GN=HTRA1 PE=2 SV=1;tr|B3KRN4|B3KRN4\_HUMAN cDN  
UMAN Isoform 3 of Neuronal cell adhesion molecule OS=Homo sapiens OX=9606 GN=NRCAM;sp|Q9  
3 of Golgi apparatus protein 1 OS=Homo sapiens OX=9606 GN=GLG1;sp|Q92896-2|GSLG1\_HUMAN I  
|Q96FE7-4|P3IP1\_HUMAN Isoform 4 of Phosphoinositide-3-kinase-interacting protein 1 OS=Homo sa  
disease protein 7 OS=Homo sapiens OX=9606 GN=PARK7 PE=1 SV=2;tr|K7ELW0|K7ELW0\_HUMAN F  
ptidase OS=Homo sapiens OX=9606 GN=LGMN PE=2 SV=1;tr|Q53XC6|Q53XC6\_HUMAN Asparaginyl  
Collagen alpha-1(XII) chain OS=Homo sapiens OX=9606 GN=COL12A1 PE=1 SV=1;sp|Q99715|COCA1

IMAN Thioredoxin domain-containing protein 17 OS=Homo sapiens OX=9606 GN=TXNDC17 PE=1 SV=  
15 kDa calcium-binding protein OS=Homo sapiens OX=9606 GN=SDF4 PE=1 SV=1;sp|Q9BRK5-3|CAB4  
\_HUMAN Tubulointerstitial nephritis antigen-like OS=Homo sapiens OX=9606 GN=TINAGL1 PE=1 SV=  
22|Q86Z22\_HUMAN Epididymis secretory protein Li 297 OS=Homo sapiens OX=9606 GN=HEL-S-297  
-4B OS=Homo sapiens OX=9606 GN=SEMA4B PE=1 SV=4;tr|H0YIMZ3|H0YIMZ3\_HUMAN Semaphorin-  
n-2 OS=Homo sapiens OX=9606 GN=TENM2;tr|G3V106|G3V106\_HUMAN HCG38403, isoform CRA\_k  
\_HUMAN Cysteine-rich motor neuron 1 protein OS=Homo sapiens OX=9606 GN=CRIM1 PE=1 SV=1  
WL2\_HUMAN PTGFRN protein (Fragment) OS=Homo sapiens OX=9606 GN=PTGFRN PE=2 SV=1;tr|Q4  
lated protein 3 OS=Homo sapiens OX=9606 GN=DKK3 PE=1 SV=1;tr|O43532|O43532\_HUMAN RIG-li

arboxypeptidase A4 OS=Homo sapiens OX=9606 GN=CPA4;tr|A4D1M3|A4D1M3\_HUMAN Carboxype  
AN Collagen, type XVII, alpha 1, isoform CRA\_b OS=Homo sapiens OX=9606 GN=COL17A1 PE=2 SV=1;  
-HUMAN Endothelial protein C receptor (Fragment) OS=Homo sapiens OX=9606 GN=PROCR PE=1 SV=  
A2I2MP49|A0A2I2MP49\_HUMAN Kallikrein-related peptidase 5 transcript variant 6 OS=Homo sapie  
: homolog 2 OS=Homo sapiens OX=9606 GN=LOXL2 PE=1 SV=1;tr|W8QRJ0|W8QRJ0\_HUMAN Lysyl o  
V Suppressor of tumorigenicity 14 protein OS=Homo sapiens OX=9606 GN=ST14 PE=1 SV=2;tr|Q8WV  
tional adhesion molecule 1 OS=Homo sapiens OX=9606 GN=F11R PE=2 SV=1;sp|Q9Y624|JAM1\_HUM

4N7\_HUMAN Kallikrein 10, isoform CRA\_a OS=Homo sapiens OX=9606 GN=KLK10 PE=4 SV=1;tr|W8C  
4LE33\_HUMAN TNC variant protein (Fragment) OS=Homo sapiens OX=9606 GN=TNC variant protein  
SV=1;sp|P98160|PGBM\_HUMAN Basement membrane-specific heparan sulfate proteoglycan core p  
3|A0A0B4U5E3\_HUMAN Granulocyte colony-stimulating factor (Fragment) OS=Homo sapiens OX=96  
MAN MHC class I antigen OS=Homo sapiens OX=9606 GN=HLA-C PE=3 SV=1;tr|A0A5H2UZM2|A0A5H  
-HUMAN;tr|E5FQ47|E5FQ47\_HUMAN;tr|A0A0F7RPE2|A0A0F7RPE2\_HUMAN;tr|D1MYY9|D1MYY9\_H

plement subcomponent C1r (Fragment) OS=Homo sapiens OX=9606 PE=2 SV=1;tr|Q53HT9|Q53H

, highly similar to Homo sapiens ribonuclease, RNase A family, 7 (RNASE7), mRNA OS=Homo sapiens



p|P14780|MMP9\_HUMAN Matrix metalloproteinase-9 OS=Homo sapiens OX=9606 GN=MMP9 PE=1

.N Urokinase-type plasminogen activator (Fragment) OS=Homo sapiens OX=9606 PE=2 SV=1;sp|P007  
C class I antigen (Fragment) OS=Homo sapiens OX=9606 GN=HLA-C PE=3 SV=1;tr|B4DYY0|B4DYY0\_1  
:GFA\_HUMAN Isoform VEGF189 of Vascular endothelial growth factor A OS=Homo sapiens OX=9606  
DNA FLJ34961 fis, clone NTONG2003839, highly similar to CONNECTIVE TISSUE GROWTH FACTOR OS:









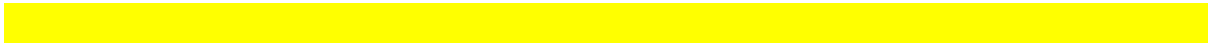

-HUMAN;tr|A0A5H2UFF7|A0A5H2UFF7\_HUMAN;tr|A0A3S6RFC0|A0A3S6RFC0\_HUMAN;tr|A0A6B7H















GP6|A0A6B7HGP6\_HUMAN;tr|A0A6B9VTX5|A0A6B9VTX5\_HUMAN;tr|A0A5H2UF70|A0A5H2UF70\_















\_HUMAN;tr|A0A4Y5P8Y7|A0A4Y5P8Y7\_HUMAN;tr|A0A4P2SQZ3|A0A4P2SQZ3\_HUMAN;tr|A0A4P2















SQQ2|A0A4P2SQQ2\_HUMAN;tr|A0A3S6RIB1|A0A3S6RIB1\_HUMAN;tr|A0A6B7HGP2|A0A6B7HGP2\_















\_HUMAN;tr|A0A583ZAW1|A0A583ZAW1\_HUMAN;tr|A0A3G2Y4K4|A0A3G2Y4K4\_HUMAN;tr|A0A6I















B9VR96|A0A6B9VR96\_HUMAN;tr|A0A6B7FTB7|A0A6B7FTB7\_HUMAN;tr|A0A223FL72|A0A223FL72















!\_HUMAN;tr|A0A6C0SE86|A0A6C0SE86\_HUMAN;tr|A0A6C0SEA1|A0A6C0SEA1\_HUMAN;tr|B1PKY3













|B1PKY3\_HUMAN;tr|A0A4Y5ULL4|A0A4Y5ULL4\_HUMAN;tr|A0A4P2STA1|A0A4P2STA1\_HUMAN;tr















|A0A4P2ST16|A0A4P2ST16\_HUMAN;tr|A0A6B7HHR8|A0A6B7HHR8\_HUMAN;tr|A0A3S6REZ3|A0A3















S6REZ3\_HUMAN;tr|A0A2P9FIT1|A0A2P9FIT1\_HUMAN;tr|A0A2U3QLE8|A0A2U3QLE8\_HUMAN;tr|A













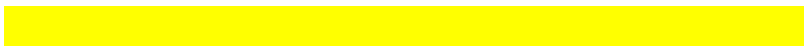

\0A2U3QLG4|A0A2U3QLG4\_HUMAN;tr|A0A2U3QLL1|A0A2U3QLL

| LFQ intens |
|------------|------------|------------|------------|------------|------------|------------|------------|------------|
| 31,03118   | 32,02697   | 32,30549   | 28,31095   | 28,08035   | 29,06669   | 28,91336   | 20,79574   | 24,09746   |
| 24,83543   | 25,70187   | 25,88129   | 28,09989   | 27,96157   | 27,57521   | 27,98994   | 28,46045   | 28,40068   |
| 23,09327   | 22,72077   | 24,42926   | 29,01081   | 29,04226   | 29,36077   | 29,08563   | 28,76284   | 29,60442   |
| 30,29351   | 30,37098   | 30,32034   | 29,59586   | 29,41542   | 29,22338   | 29,18959   | 28,92872   | 28,58043   |
| 22,48696   | 23,48598   | 22,96295   | 25,59269   | 25,5305    | 25,10185   | 25,35279   | 24,66536   | 25,05383   |
| 23,67721   | 22,78137   | 23,41876   | 26,10536   | 26,18569   | 25,36903   | 25,84886   | 23,16877   | 21,86169   |
| 22,7308    | 23,63123   | 24,27583   | 26,40868   | 26,53424   | 27,85412   | 27,98462   | 27,96505   | 27,55311   |
| 27,87473   | 26,84828   | 26,64403   | 24,01014   | 22,0047    | 23,69696   | 22,98111   | 23,15847   | 24,53848   |
| 32,43964   | 31,66072   | 31,17665   | 34,3535    | 34,38985   | 33,92344   | 33,84763   | 34,53907   | 34,4746    |
| 24,86815   | 25,55318   | 24,44979   | 26,60399   | 26,9215    | 27,41828   | 26,91969   | 25,86976   | 26,79687   |
| 24,52641   | 24,32745   | 22,21216   | 29,76836   | 29,95754   | 30,88103   | 31,05601   | 30,82533   | 29,67459   |

| LFQ intens | LFQ intens | Potential c | Student's T | Student's T | Peptides | Razor + un | Unique pe | Sequence c |
|------------|------------|-------------|-------------|-------------|----------|------------|-----------|------------|
| 22,47785   | 30,51427   | +           | +           | 1_2         | 29       | 17         | 3         | 46,1       |
| 27,99145   | 27,2674    |             | +           | 1_2         | 26       | 26         | 24        | 21,6       |
| 29,71363   | 21,02804   |             | +           | 1_2         | 6        | 6          | 3         | 21,1       |
| 28,83533   | 29,82773   |             | +           | 1_2         | 11       | 10         | 10        | 39,3       |
| 24,57306   | 24,00873   |             | +           | 1_2         | 5        | 5          | 5         | 15         |
| 24,02359   | 22,4964    |             | +           | 1_2         | 2        | 2          | 2         | 21,4       |
| 27,3946    | 27,05765   |             | +           | 1_2         | 13       | 13         | 13        | 5,9        |
| 23,00949   | 22,52667   |             | +           | 1_2         | 3        | 3          | 3         | 9,7        |
| 34,5739    | 34,16121   |             | +           | 1_2         | 22       | 22         | 22        | 49,7       |
| 26,64072   | 25,56842   |             | +           | 1_2         | 6        | 6          | 6         | 34,8       |
| 29,61569   | 29,87948   |             | +           | 1_2         | 18       | 18         | 17        | 36,4       |

| Unique + r | Unique sec | Mol. weight | Q-value | Score  | Intensity | MS/MS col | iBAQ 1-1 | iBAQ 1-3 |
|------------|------------|-------------|---------|--------|-----------|-----------|----------|----------|
| 31,7       | 6,7        | 58,536      | 0       | 132,71 | 9,64E+09  | 86        | 53050000 | 60895000 |
| 21,6       | 20,5       | 187,15      | 0       | 220,13 | 1,57E+09  | 99        | 227840   | 107200   |
| 21,1       | 12,1       | 28,955      | 0       | 12,282 | 3,05E+09  | 20        | 2358100  | 0        |
| 35,8       | 35,8       | 37,294      | 0       | 196,48 | 6,44E+09  | 90        | 1,13E+08 | 60047000 |
| 15         | 15         | 57,519      | 0       | 7,4178 | 1,92E+08  | 16        | 0        | 0        |
| 21,4       | 21,4       | 12,269      | 0       | 4,7231 | 1,89E+08  | 9         | 0        | 0        |
| 5,9        | 5,9        | 337,08      | 0       | 41,513 | 1,03E+09  | 34        | 237820   | 160850   |
| 9,7        | 9,7        | 51,853      | 0       | 5,2514 | 3,99E+08  | 5         | 9752800  | 3496400  |
| 49,7       | 49,7       | 65,33       | 0       | 323,31 | 1,23E+11  | 243       | 2E+08    | 59886000 |
| 34,8       | 34,8       | 24,093      | 0       | 11,912 | 6,03E+08  | 32        | 722330   | 1656600  |
| 36,4       | 35         | 76,613      | 0       | 102,9  | 6,63E+09  | 108       | 572730   | 319880   |



| iBAQ 1-5 | iBAQ 2-1 | iBAQ 2-2 | iBAQ 2-3 | iBAQ 2-4 | iBAQ 3-1 | iBAQ 3-2 | iBAQ 3-3 | iBAQ 3-4 |
|----------|----------|----------|----------|----------|----------|----------|----------|----------|
| 97959000 | 7555900  | 4620300  | 20505000 | 16035000 | 28207    | 21636    | 24610    | 71577000 |
| 403000   | 2500100  | 1334000  | 1378500  | 1308900  | 3850300  | 1884600  | 2576400  | 658530   |
| 0        | 20937000 | 13857000 | 32459000 | 26807000 | 26709000 | 25082000 | 22270000 | 9153000  |
| 47984000 | 33719000 | 11325000 | 13995000 | 28474000 | 15008000 | 19226000 | 12486000 | 23964000 |
| 0        | 1918000  | 1511600  | 552490   | 640380   | 1071300  | 1375000  | 792110   | 150430   |
| 1063800  | 9016000  | 7426100  | 3955500  | 7096900  | 2074800  | 517490   | 0        | 362010   |
| 114580   | 511800   | 515550   | 841040   | 596960   | 1513900  | 1613200  | 382330   | 370260   |
| 3898700  | 426320   | 0        | 239380   | 520440   | 662200   | 0        | 0        | 0        |
| 37044000 | 6,17E+08 | 6,56E+08 | 3,42E+08 | 3,78E+08 | 8,27E+08 | 5,07E+08 | 6,61E+08 | 4,61E+08 |
| 2198700  | 9511400  | 9987700  | 12240000 | 5983300  | 440490   | 4866300  | 4471200  | 2736900  |
| 32887    | 11261000 | 14385000 | 31679000 | 46276000 | 30816000 | 12062000 | 21324000 | 10422000 |

Student's T Student's T Student's T Student's T Majority p Fasta headers

|          |          |          |          |                                       |                   |
|----------|----------|----------|----------|---------------------------------------|-------------------|
| 0,000678 | 0,0104   | 3,195041 | 6,05605  | tr B4DRU6 B4DRU6 B4DRU6_HUMAN         | cDNA FLJ5465      |
| 0,000478 | 0,008667 | -2,43379 | -6,05135 | tr V9HWA9 V9HWA9 V9HWA9_HUMAN         | C3-beta-c O       |
| 5,07E-05 | 0        | -5,71043 | -10,4934 | sp P06753 P06753-3 TPM3_HUMAN         | Isoform 3 of T    |
| 0,00035  | 0,041455 | 0,972214 | 4,564527 | tr A0A5F9 A0A5F9ZHM4 A0A5F9ZHM4_HUMAN | L-l               |
| 0,000313 | 0,017333 | -2,41583 | -6,45563 | tr F8WCZ6 F8WCZ6 F8WCZ6_HUMAN         | Complement        |
| 0,000415 | 0,013    | -2,58479 | -6,2821  | sp P19957 P19957 ELAF_HUMAN           | Elafin OS=Homo s  |
| 0,002042 | 0,030222 | -3,64947 | -5,0539  | sp P25391 P25391 LAMA1_HUMAN          | Laminin subuni    |
| 0,001365 | 0,016571 | 3,949118 | 5,519495 | sp P53634 P53634 CATC_HUMAN           | Dipeptidyl peptid |
| 0,001073 | 0,0275   | -2,3696  | -5,26204 | tr A0A0S2 A0A0S2Z3Y1 A0A0S2Z3Y1_HUMAN | Galec             |
| 0,001844 | 0,0324   | -2,00883 | -4,62096 | tr W8GRM7 W8GRM7 W8GRM7_HUMAN         | Kallikrein 1      |
| 0,00025  | 0        | -6,72706 | -8,12234 | tr F5H2D0 F5H2D0 F5H2D0_HUMAN         | Complement s      |

i7, highly similar to Keratin, type II cytoskeletal 6A OS=Homo sapiens OX=9606 PE=2 SV=1;sp|P02538  
S=Homo sapiens OX=9606 GN=HEL-S-62p PE=2 SV=1;sp|P01024|CO3\_HUMAN Complement C3 OS=H  
ropomyosin alpha-3 chain OS=Homo sapiens OX=9606 GN=TPM3;tr|A0A087WWU8|A0A087WWU8\_  
actate dehydrogenase OS=Homo sapiens OX=9606 GN=LDHB PE=1 SV=1;sp|P07195|LDHB\_HUMAN I  
C1s subcomponent OS=Homo sapiens OX=9606 GN=C1S PE=1 SV=1;tr|A0A087X232|A0A087X232\_H

lase 1 OS=Homo sapiens OX=9606 GN=CTSC PE=1 SV=2;tr|B4DJQ8|B4DJQ8\_HUMAN Cathepsin C OS  
:tin-3-binding protein (Fragment) OS=Homo sapiens OX=9606 GN=LGALS3BP PE=2 SV=1;sp|Q08380|  
0 protein 9 (Fragment) OS=Homo sapiens OX=9606 GN=KLK10 PE=2 SV=1;tr|A0A024R4N7|A0A024R  
ubcomponent C1r OS=Homo sapiens OX=9606 GN=C1R PE=1 SV=3;tr|Q53HU9|Q53HU9\_HUMAN Cc

;|K2C6A\_HUMAN Keratin, type II cytoskeletal 6A OS=Homo sapiens OX=9606 GN=KRT6A PE=1 SV=3;|  
Homo sapiens OX=9606 GN=C3 PE=1 SV=2;tr|B4E216|B4E216\_HUMAN C3-beta-c OS=Homo sapiens  
\_HUMAN Tropomyosin alpha-3 chain OS=Homo sapiens OX=9606 GN=TPM3 PE=1 SV=1;sp|P06753-2  
\_lactate dehydrogenase B chain OS=Homo sapiens OX=9606 GN=LDHB PE=1 SV=2;tr|Q5U077|Q5U0  
UMAN Complement C1s subcomponent OS=Homo sapiens OX=9606 GN=C1S PE=1 SV=1;tr|B3KNX0|

LG3BP\_HUMAN Galectin-3-binding protein OS=Homo sapiens OX=9606 GN=LGALS3BP PE=1 SV=1;tr|  
4N7\_HUMAN Kallikrein 10, isoform CRA\_a OS=Homo sapiens OX=9606 GN=KLK10 PE=4 SV=1;tr|W8C  
omplement subcomponent C1r (Fragment) OS=Homo sapiens OX=9606 PE=2 SV=1;tr|Q53HT9|Q53H

|TPM3\_HUMAN Isoform 2 of Tropomyosin alpha-3 chain O  
77\_HUMAN L-lactate dehydrogenase OS=Homo sapiens O  
B3KNX0\_HUMAN cDNA FLJ30621 fis, clone CTONG2001681, hi

T9\_HUMAN Complement subcomponent C1r (Fragment) OS=Hom

|   |   |   |   |   |   |   |   |   |    |    |    |    |    |    |    |    |    |    |    |    |    |    |    |    |    |    |    |    |    |    |    |    |    |    |    |    |    |    |    |    |    |    |    |    |    |    |    |    |    |    |    |    |    |    |    |    |    |    |    |    |    |    |    |    |    |    |    |    |    |    |    |    |    |    |    |    |    |    |    |    |    |    |    |    |    |    |    |    |    |    |    |    |    |    |    |    |    |    |     |     |     |     |     |     |     |     |     |     |     |     |     |     |     |     |     |     |     |     |     |     |     |     |     |     |     |     |     |     |     |     |     |     |     |     |     |     |     |     |     |     |     |     |     |     |     |     |     |     |     |     |     |     |     |     |     |     |     |     |     |     |     |     |     |     |     |     |     |     |     |     |     |     |     |     |     |     |     |     |     |     |     |     |     |     |     |     |     |     |     |     |     |     |     |     |     |     |     |     |     |     |     |     |     |     |     |     |     |     |     |     |     |     |     |     |     |     |     |     |     |     |     |     |     |     |     |     |     |     |     |     |     |     |     |     |     |     |     |     |     |     |     |     |     |     |     |     |     |     |     |     |     |     |     |     |     |     |     |     |     |     |     |     |     |     |     |     |     |     |     |     |     |     |     |     |     |     |     |     |     |     |     |     |     |     |     |     |     |     |     |     |     |     |     |     |     |     |     |     |     |     |     |     |     |     |     |     |     |     |     |     |     |     |     |     |     |     |     |     |     |     |     |     |     |     |     |     |     |     |     |     |     |     |     |     |     |     |     |     |     |     |     |     |     |     |     |     |     |     |     |     |     |     |     |     |     |     |     |     |     |     |     |     |     |     |     |     |     |     |     |     |     |     |     |     |     |     |     |     |     |     |     |     |     |     |     |     |     |     |     |     |     |     |     |     |     |     |     |     |     |     |     |     |     |     |     |     |     |     |     |     |     |     |     |     |     |     |     |     |     |     |     |     |     |     |     |     |     |     |     |     |     |     |     |     |     |     |     |     |     |     |     |     |     |     |     |     |     |     |     |     |     |     |     |     |     |     |     |     |     |     |     |     |     |     |     |     |     |     |     |     |     |     |     |     |     |     |     |     |     |     |     |     |     |     |     |     |     |     |     |     |     |     |     |     |     |     |     |     |     |     |     |     |     |     |     |     |     |     |     |     |     |     |     |     |     |     |     |     |     |     |     |     |     |     |     |     |     |     |     |     |     |     |     |     |     |     |     |     |     |     |     |     |     |     |     |     |     |     |     |     |     |     |     |     |     |     |     |     |     |     |     |     |     |     |     |     |     |     |     |     |     |     |     |     |     |     |     |     |     |     |     |     |     |     |     |     |     |     |     |     |     |     |     |     |     |     |     |     |     |     |     |     |     |     |     |     |     |     |     |     |     |     |     |     |     |     |     |     |     |     |     |     |     |     |     |     |     |     |     |     |     |     |     |     |     |     |     |     |     |     |     |     |     |     |     |     |     |     |     |     |     |     |     |     |     |     |     |     |     |     |     |     |     |     |     |     |     |     |     |     |     |     |     |     |     |     |     |     |     |     |     |     |     |     |     |     |     |     |     |     |     |     |     |     |     |     |     |     |     |     |     |     |     |     |     |     |     |     |     |     |     |     |     |     |     |     |     |     |     |     |     |     |     |     |     |     |     |     |     |     |     |     |     |     |     |     |     |     |     |     |     |     |     |     |     |     |     |     |     |     |     |     |     |     |     |     |     |     |     |     |     |     |     |     |     |     |     |     |     |     |     |     |     |     |     |     |     |     |     |     |     |     |     |     |     |     |     |     |     |     |     |     |     |     |     |     |     |     |     |     |     |     |     |     |     |     |     |     |     |     |     |     |     |     |     |     |     |     |     |     |     |     |     |     |     |     |     |     |     |     |     |     |     |     |     |     |     |     |     |     |     |     |     |     |     |     |     |     |     |     |     |     |     |     |     |     |     |     |     |     |     |     |     |     |     |     |     |     |     |     |     |     |     |     |     |     |     |     |     |     |     |     |     |     |     |     |     |     |     |     |     |     |     |     |     |     |     |     |     |     |     |     |     |     |     |     |     |     |     |     |     |     |     |     |     |     |     |     |     |     |     |     |     |     |     |     |     |     |     |     |     |     |     |     |     |     |     |     |     |     |     |     |     |     |     |     |     |     |     |     |     |     |     |     |     |     |     |     |     |     |     |     |     |     |     |     |     |     |     |     |     |     |     |     |     |     |     |     |     |     |     |     |     |     |     |     |     |     |     |     |     |     |     |     |     |     |     |     |      |      |      |      |      |      |      |      |      |      |      |      |      |      |      |      |      |      |      |      |      |      |      |      |      |      |      |      |      |      |      |      |      |      |      |      |      |      |      |      |      |      |      |      |      |      |      |      |      |      |      |      |      |      |      |      |      |      |      |      |      |      |      |      |      |      |      |      |      |      |      |      |      |      |      |      |      |      |      |      |      |      |      |      |      |      |      |      |      |      |      |      |      |      |      |      |      |      |      |      |      |      |      |      |      |      |      |      |      |      |      |      |      |      |      |      |      |      |      |      |      |      |      |      |      |      |      |      |      |      |      |      |      |      |      |      |      |      |      |      |      |      |      |      |      |      |      |      |      |      |      |      |      |      |      |      |      |      |      |      |      |      |      |      |      |      |      |      |      |      |      |      |      |      |      |      |      |      |      |      |      |      |      |      |      |      |      |      |      |      |      |      |      |      |      |      |      |      |      |      |      |      |      |      |      |      |      |      |      |      |      |      |      |      |      |      |      |      |      |      |      |      |      |      |      |      |      |      |      |      |      |      |      |      |      |      |      |      |      |      |      |      |      |      |      |      |      |      |      |      |      |      |      |      |      |      |      |      |      |      |      |      |      |      |      |      |      |      |      |      |      |      |      |      |      |      |      |      |      |      |      |      |      |      |      |      |      |      |      |      |      |      |      |      |      |      |      |      |      |      |      |      |      |      |      |      |      |      |      |      |      |      |      |      |      |      |      |      |      |      |      |      |      |      |      |      |      |      |      |      |      |      |      |      |      |      |      |      |      |      |      |      |      |      |      |      |      |      |      |      |      |      |      |      |      |      |      |      |      |      |      |      |      |      |      |      |      |      |      |      |      |      |      |      |      |      |      |      |      |      |      |      |      |      |      |      |      |      |      |      |      |      |      |      |      |      |      |      |      |      |      |      |      |      |      |      |      |      |      |      |      |      |      |      |      |      |      |      |      |      |      |      |      |      |      |      |      |      |      |      |      |      |      |      |      |      |      |      |      |      |      |      |      |      |      |      |      |      |      |      |      |      |      |      |      |      |      |      |      |      |      |      |      |      |      |      |      |      |      |      |      |      |      |      |      |      |      |      |      |      |      |      |      |      |      |      |      |      |      |      |      |      |      |      |      |      |      |      |      |     |
|---|---|---|---|---|---|---|---|---|----|----|----|----|----|----|----|----|----|----|----|----|----|----|----|----|----|----|----|----|----|----|----|----|----|----|----|----|----|----|----|----|----|----|----|----|----|----|----|----|----|----|----|----|----|----|----|----|----|----|----|----|----|----|----|----|----|----|----|----|----|----|----|----|----|----|----|----|----|----|----|----|----|----|----|----|----|----|----|----|----|----|----|----|----|----|----|----|----|----|-----|-----|-----|-----|-----|-----|-----|-----|-----|-----|-----|-----|-----|-----|-----|-----|-----|-----|-----|-----|-----|-----|-----|-----|-----|-----|-----|-----|-----|-----|-----|-----|-----|-----|-----|-----|-----|-----|-----|-----|-----|-----|-----|-----|-----|-----|-----|-----|-----|-----|-----|-----|-----|-----|-----|-----|-----|-----|-----|-----|-----|-----|-----|-----|-----|-----|-----|-----|-----|-----|-----|-----|-----|-----|-----|-----|-----|-----|-----|-----|-----|-----|-----|-----|-----|-----|-----|-----|-----|-----|-----|-----|-----|-----|-----|-----|-----|-----|-----|-----|-----|-----|-----|-----|-----|-----|-----|-----|-----|-----|-----|-----|-----|-----|-----|-----|-----|-----|-----|-----|-----|-----|-----|-----|-----|-----|-----|-----|-----|-----|-----|-----|-----|-----|-----|-----|-----|-----|-----|-----|-----|-----|-----|-----|-----|-----|-----|-----|-----|-----|-----|-----|-----|-----|-----|-----|-----|-----|-----|-----|-----|-----|-----|-----|-----|-----|-----|-----|-----|-----|-----|-----|-----|-----|-----|-----|-----|-----|-----|-----|-----|-----|-----|-----|-----|-----|-----|-----|-----|-----|-----|-----|-----|-----|-----|-----|-----|-----|-----|-----|-----|-----|-----|-----|-----|-----|-----|-----|-----|-----|-----|-----|-----|-----|-----|-----|-----|-----|-----|-----|-----|-----|-----|-----|-----|-----|-----|-----|-----|-----|-----|-----|-----|-----|-----|-----|-----|-----|-----|-----|-----|-----|-----|-----|-----|-----|-----|-----|-----|-----|-----|-----|-----|-----|-----|-----|-----|-----|-----|-----|-----|-----|-----|-----|-----|-----|-----|-----|-----|-----|-----|-----|-----|-----|-----|-----|-----|-----|-----|-----|-----|-----|-----|-----|-----|-----|-----|-----|-----|-----|-----|-----|-----|-----|-----|-----|-----|-----|-----|-----|-----|-----|-----|-----|-----|-----|-----|-----|-----|-----|-----|-----|-----|-----|-----|-----|-----|-----|-----|-----|-----|-----|-----|-----|-----|-----|-----|-----|-----|-----|-----|-----|-----|-----|-----|-----|-----|-----|-----|-----|-----|-----|-----|-----|-----|-----|-----|-----|-----|-----|-----|-----|-----|-----|-----|-----|-----|-----|-----|-----|-----|-----|-----|-----|-----|-----|-----|-----|-----|-----|-----|-----|-----|-----|-----|-----|-----|-----|-----|-----|-----|-----|-----|-----|-----|-----|-----|-----|-----|-----|-----|-----|-----|-----|-----|-----|-----|-----|-----|-----|-----|-----|-----|-----|-----|-----|-----|-----|-----|-----|-----|-----|-----|-----|-----|-----|-----|-----|-----|-----|-----|-----|-----|-----|-----|-----|-----|-----|-----|-----|-----|-----|-----|-----|-----|-----|-----|-----|-----|-----|-----|-----|-----|-----|-----|-----|-----|-----|-----|-----|-----|-----|-----|-----|-----|-----|-----|-----|-----|-----|-----|-----|-----|-----|-----|-----|-----|-----|-----|-----|-----|-----|-----|-----|-----|-----|-----|-----|-----|-----|-----|-----|-----|-----|-----|-----|-----|-----|-----|-----|-----|-----|-----|-----|-----|-----|-----|-----|-----|-----|-----|-----|-----|-----|-----|-----|-----|-----|-----|-----|-----|-----|-----|-----|-----|-----|-----|-----|-----|-----|-----|-----|-----|-----|-----|-----|-----|-----|-----|-----|-----|-----|-----|-----|-----|-----|-----|-----|-----|-----|-----|-----|-----|-----|-----|-----|-----|-----|-----|-----|-----|-----|-----|-----|-----|-----|-----|-----|-----|-----|-----|-----|-----|-----|-----|-----|-----|-----|-----|-----|-----|-----|-----|-----|-----|-----|-----|-----|-----|-----|-----|-----|-----|-----|-----|-----|-----|-----|-----|-----|-----|-----|-----|-----|-----|-----|-----|-----|-----|-----|-----|-----|-----|-----|-----|-----|-----|-----|-----|-----|-----|-----|-----|-----|-----|-----|-----|-----|-----|-----|-----|-----|-----|-----|-----|-----|-----|-----|-----|-----|-----|-----|-----|-----|-----|-----|-----|-----|-----|-----|-----|-----|-----|-----|-----|-----|-----|-----|-----|-----|-----|-----|-----|-----|-----|-----|-----|-----|-----|-----|-----|-----|-----|-----|-----|-----|-----|-----|-----|-----|-----|-----|-----|-----|-----|-----|-----|-----|-----|-----|-----|-----|-----|-----|-----|-----|-----|-----|-----|-----|-----|-----|-----|-----|-----|-----|-----|-----|-----|-----|-----|-----|-----|-----|-----|-----|-----|-----|-----|-----|-----|-----|-----|-----|-----|-----|-----|-----|-----|-----|-----|-----|-----|-----|-----|-----|-----|-----|-----|-----|-----|-----|-----|-----|-----|-----|-----|-----|-----|-----|-----|-----|-----|-----|-----|-----|-----|-----|-----|-----|-----|-----|-----|-----|-----|-----|-----|-----|-----|-----|-----|-----|-----|-----|-----|-----|-----|-----|-----|-----|-----|-----|-----|-----|-----|-----|-----|-----|-----|-----|-----|-----|-----|-----|-----|-----|-----|-----|-----|-----|-----|-----|-----|-----|-----|-----|-----|-----|-----|-----|-----|-----|-----|-----|-----|-----|-----|-----|-----|-----|-----|-----|-----|-----|-----|-----|-----|-----|-----|-----|-----|-----|-----|-----|-----|-----|-----|-----|-----|-----|-----|-----|-----|-----|-----|-----|-----|-----|-----|-----|-----|-----|-----|-----|-----|-----|-----|-----|-----|-----|-----|-----|-----|-----|-----|-----|-----|-----|-----|-----|-----|-----|-----|-----|-----|-----|-----|-----|-----|-----|-----|-----|-----|-----|-----|-----|-----|-----|-----|-----|-----|-----|-----|-----|-----|-----|-----|-----|-----|-----|-----|-----|-----|-----|-----|-----|-----|-----|-----|-----|------|------|------|------|------|------|------|------|------|------|------|------|------|------|------|------|------|------|------|------|------|------|------|------|------|------|------|------|------|------|------|------|------|------|------|------|------|------|------|------|------|------|------|------|------|------|------|------|------|------|------|------|------|------|------|------|------|------|------|------|------|------|------|------|------|------|------|------|------|------|------|------|------|------|------|------|------|------|------|------|------|------|------|------|------|------|------|------|------|------|------|------|------|------|------|------|------|------|------|------|------|------|------|------|------|------|------|------|------|------|------|------|------|------|------|------|------|------|------|------|------|------|------|------|------|------|------|------|------|------|------|------|------|------|------|------|------|------|------|------|------|------|------|------|------|------|------|------|------|------|------|------|------|------|------|------|------|------|------|------|------|------|------|------|------|------|------|------|------|------|------|------|------|------|------|------|------|------|------|------|------|------|------|------|------|------|------|------|------|------|------|------|------|------|------|------|------|------|------|------|------|------|------|------|------|------|------|------|------|------|------|------|------|------|------|------|------|------|------|------|------|------|------|------|------|------|------|------|------|------|------|------|------|------|------|------|------|------|------|------|------|------|------|------|------|------|------|------|------|------|------|------|------|------|------|------|------|------|------|------|------|------|------|------|------|------|------|------|------|------|------|------|------|------|------|------|------|------|------|------|------|------|------|------|------|------|------|------|------|------|------|------|------|------|------|------|------|------|------|------|------|------|------|------|------|------|------|------|------|------|------|------|------|------|------|------|------|------|------|------|------|------|------|------|------|------|------|------|------|------|------|------|------|------|------|------|------|------|------|------|------|------|------|------|------|------|------|------|------|------|------|------|------|------|------|------|------|------|------|------|------|------|------|------|------|------|------|------|------|------|------|------|------|------|------|------|------|------|------|------|------|------|------|------|------|------|------|------|------|------|------|------|------|------|------|------|------|------|------|------|------|------|------|------|------|------|------|------|------|------|------|------|------|------|------|------|------|------|------|------|------|------|------|------|------|------|------|------|------|------|------|------|------|------|------|------|------|------|------|------|------|------|------|------|------|------|------|------|------|------|------|------|------|------|------|------|------|------|------|------|------|------|------|------|------|------|------|------|------|------|------|------|------|------|------|------|------|------|------|------|------|------|------|------|------|------|------|------|------|------|------|------|------|------|------|------|------|------|------|-----|
| 1 | 2 | 3 | 4 | 5 | 6 | 7 | 8 | 9 | 10 | 11 | 12 | 13 | 14 | 15 | 16 | 17 | 18 | 19 | 20 | 21 | 22 | 23 | 24 | 25 | 26 | 27 | 28 | 29 | 30 | 31 | 32 | 33 | 34 | 35 | 36 | 37 | 38 | 39 | 40 | 41 | 42 | 43 | 44 | 45 | 46 | 47 | 48 | 49 | 50 | 51 | 52 | 53 | 54 | 55 | 56 | 57 | 58 | 59 | 60 | 61 | 62 | 63 | 64 | 65 | 66 | 67 | 68 | 69 | 70 | 71 | 72 | 73 | 74 | 75 | 76 | 77 | 78 | 79 | 80 | 81 | 82 | 83 | 84 | 85 | 86 | 87 | 88 | 89 | 90 | 91 | 92 | 93 | 94 | 95 | 96 | 97 | 98 | 99 | 100 | 101 | 102 | 103 | 104 | 105 | 106 | 107 | 108 | 109 | 110 | 111 | 112 | 113 | 114 | 115 | 116 | 117 | 118 | 119 | 120 | 121 | 122 | 123 | 124 | 125 | 126 | 127 | 128 | 129 | 130 | 131 | 132 | 133 | 134 | 135 | 136 | 137 | 138 | 139 | 140 | 141 | 142 | 143 | 144 | 145 | 146 | 147 | 148 | 149 | 150 | 151 | 152 | 153 | 154 | 155 | 156 | 157 | 158 | 159 | 160 | 161 | 162 | 163 | 164 | 165 | 166 | 167 | 168 | 169 | 170 | 171 | 172 | 173 | 174 | 175 | 176 | 177 | 178 | 179 | 180 | 181 | 182 | 183 | 184 | 185 | 186 | 187 | 188 | 189 | 190 | 191 | 192 | 193 | 194 | 195 | 196 | 197 | 198 | 199 | 200 | 201 | 202 | 203 | 204 | 205 | 206 | 207 | 208 | 209 | 210 | 211 | 212 | 213 | 214 | 215 | 216 | 217 | 218 | 219 | 220 | 221 | 222 | 223 | 224 | 225 | 226 | 227 | 228 | 229 | 230 | 231 | 232 | 233 | 234 | 235 | 236 | 237 | 238 | 239 | 240 | 241 | 242 | 243 | 244 | 245 | 246 | 247 | 248 | 249 | 250 | 251 | 252 | 253 | 254 | 255 | 256 | 257 | 258 | 259 | 260 | 261 | 262 | 263 | 264 | 265 | 266 | 267 | 268 | 269 | 270 | 271 | 272 | 273 | 274 | 275 | 276 | 277 | 278 | 279 | 280 | 281 | 282 | 283 | 284 | 285 | 286 | 287 | 288 | 289 | 290 | 291 | 292 | 293 | 294 | 295 | 296 | 297 | 298 | 299 | 300 | 301 | 302 | 303 | 304 | 305 | 306 | 307 | 308 | 309 | 310 | 311 | 312 | 313 | 314 | 315 | 316 | 317 | 318 | 319 | 320 | 321 | 322 | 323 | 324 | 325 | 326 | 327 | 328 | 329 | 330 | 331 | 332 | 333 | 334 | 335 | 336 | 337 | 338 | 339 | 340 | 341 | 342 | 343 | 344 | 345 | 346 | 347 | 348 | 349 | 350 | 351 | 352 | 353 | 354 | 355 | 356 | 357 | 358 | 359 | 360 | 361 | 362 | 363 | 364 | 365 | 366 | 367 | 368 | 369 | 370 | 371 | 372 | 373 | 374 | 375 | 376 | 377 | 378 | 379 | 380 | 381 | 382 | 383 | 384 | 385 | 386 | 387 | 388 | 389 | 390 | 391 | 392 | 393 | 394 | 395 | 396 | 397 | 398 | 399 | 400 | 401 | 402 | 403 | 404 | 405 | 406 | 407 | 408 | 409 | 410 | 411 | 412 | 413 | 414 | 415 | 416 | 417 | 418 | 419 | 420 | 421 | 422 | 423 | 424 | 425 | 426 | 427 | 428 | 429 | 430 | 431 | 432 | 433 | 434 | 435 | 436 | 437 | 438 | 439 | 440 | 441 | 442 | 443 | 444 | 445 | 446 | 447 | 448 | 449 | 450 | 451 | 452 | 453 | 454 | 455 | 456 | 457 | 458 | 459 | 460 | 461 | 462 | 463 | 464 | 465 | 466 | 467 | 468 | 469 | 470 | 471 | 472 | 473 | 474 | 475 | 476 | 477 | 478 | 479 | 480 | 481 | 482 | 483 | 484 | 485 | 486 | 487 | 488 | 489 | 490 | 491 | 492 | 493 | 494 | 495 | 496 | 497 | 498 | 499 | 500 | 501 | 502 | 503 | 504 | 505 | 506 | 507 | 508 | 509 | 510 | 511 | 512 | 513 | 514 | 515 | 516 | 517 | 518 | 519 | 520 | 521 | 522 | 523 | 524 | 525 | 526 | 527 | 528 | 529 | 530 | 531 | 532 | 533 | 534 | 535 | 536 | 537 | 538 | 539 | 540 | 541 | 542 | 543 | 544 | 545 | 546 | 547 | 548 | 549 | 550 | 551 | 552 | 553 | 554 | 555 | 556 | 557 | 558 | 559 | 560 | 561 | 562 | 563 | 564 | 565 | 566 | 567 | 568 | 569 | 570 | 571 | 572 | 573 | 574 | 575 | 576 | 577 | 578 | 579 | 580 | 581 | 582 | 583 | 584 | 585 | 586 | 587 | 588 | 589 | 590 | 591 | 592 | 593 | 594 | 595 | 596 | 597 | 598 | 599 | 600 | 601 | 602 | 603 | 604 | 605 | 606 | 607 | 608 | 609 | 610 | 611 | 612 | 613 | 614 | 615 | 616 | 617 | 618 | 619 | 620 | 621 | 622 | 623 | 624 | 625 | 626 | 627 | 628 | 629 | 630 | 631 | 632 | 633 | 634 | 635 | 636 | 637 | 638 | 639 | 640 | 641 | 642 | 643 | 644 | 645 | 646 | 647 | 648 | 649 | 650 | 651 | 652 | 653 | 654 | 655 | 656 | 657 | 658 | 659 | 660 | 661 | 662 | 663 | 664 | 665 | 666 | 667 | 668 | 669 | 670 | 671 | 672 | 673 | 674 | 675 | 676 | 677 | 678 | 679 | 680 | 681 | 682 | 683 | 684 | 685 | 686 | 687 | 688 | 689 | 690 | 691 | 692 | 693 | 694 | 695 | 696 | 697 | 698 | 699 | 700 | 701 | 702 | 703 | 704 | 705 | 706 | 707 | 708 | 709 | 710 | 711 | 712 | 713 | 714 | 715 | 716 | 717 | 718 | 719 | 720 | 721 | 722 | 723 | 724 | 725 | 726 | 727 | 728 | 729 | 730 | 731 | 732 | 733 | 734 | 735 | 736 | 737 | 738 | 739 | 740 | 741 | 742 | 743 | 744 | 745 | 746 | 747 | 748 | 749 | 750 | 751 | 752 | 753 | 754 | 755 | 756 | 757 | 758 | 759 | 760 | 761 | 762 | 763 | 764 | 765 | 766 | 767 | 768 | 769 | 770 | 771 | 772 | 773 | 774 | 775 | 776 | 777 | 778 | 779 | 780 | 781 | 782 | 783 | 784 | 785 | 786 | 787 | 788 | 789 | 790 | 791 | 792 | 793 | 794 | 795 | 796 | 797 | 798 | 799 | 800 | 801 | 802 | 803 | 804 | 805 | 806 | 807 | 808 | 809 | 810 | 811 | 812 | 813 | 814 | 815 | 816 | 817 | 818 | 819 | 820 | 821 | 822 | 823 | 824 | 825 | 826 | 827 | 828 | 829 | 830 | 831 | 832 | 833 | 834 | 835 | 836 | 837 | 838 | 839 | 840 | 841 | 842 | 843 | 844 | 845 | 846 | 847 | 848 | 849 | 850 | 851 | 852 | 853 | 854 | 855 | 856 | 857 | 858 | 859 | 860 | 861 | 862 | 863 | 864 | 865 | 866 | 867 | 868 | 869 | 870 | 871 | 872 | 873 | 874 | 875 | 876 | 877 | 878 | 879 | 880 | 881 | 882 | 883 | 884 | 885 | 886 | 887 | 888 | 889 | 890 | 891 | 892 | 893 | 894 | 895 | 896 | 897 | 898 | 899 | 900 | 901 | 902 | 903 | 904 | 905 | 906 | 907 | 908 | 909 | 910 | 911 | 912 | 913 | 914 | 915 | 916 | 917 | 918 | 919 | 920 | 921 | 922 | 923 | 924 | 925 | 926 | 927 | 928 | 929 | 930 | 931 | 932 | 933 | 934 | 935 | 936 | 937 | 938 | 939 | 940 | 941 | 942 | 943 | 944 | 945 | 946 | 947 | 948 | 949 | 950 | 951 | 952 | 953 | 954 | 955 | 956 | 957 | 958 | 959 | 960 | 961 | 962 | 963 | 964 | 965 | 966 | 967 | 968 | 969 | 970 | 971 | 972 | 973 | 974 | 975 | 976 | 977 | 978 | 979 | 980 | 981 | 982 | 983 | 984 | 985 | 986 | 987 | 988 | 989 | 990 | 991 | 992 | 993 | 994 | 995 | 996 | 997 | 998 | 999 | 1000 | 1001 | 1002 | 1003 | 1004 | 1005 | 1006 | 1007 | 1008 | 1009 | 1010 | 1011 | 1012 | 1013 | 1014 | 1015 | 1016 | 1017 | 1018 | 1019 | 1020 | 1021 | 1022 | 1023 | 1024 | 1025 | 1026 | 1027 | 1028 | 1029 | 1030 | 1031 | 1032 | 1033 | 1034 | 1035 | 1036 | 1037 | 1038 | 1039 | 1040 | 1041 | 1042 | 1043 | 1044 | 1045 | 1046 | 1047 | 1048 | 1049 | 1050 | 1051 | 1052 | 1053 | 1054 | 1055 | 1056 | 1057 | 1058 | 1059 | 1060 | 1061 | 1062 | 1063 | 1064 | 1065 | 1066 | 1067 | 1068 | 1069 | 1070 | 1071 | 1072 | 1073 | 1074 | 1075 | 1076 | 1077 | 1078 | 1079 | 1080 | 1081 | 1082 | 1083 | 1084 | 1085 | 1086 | 1087 | 1088 | 1089 | 1090 | 1091 | 1092 | 1093 | 1094 | 1095 | 1096 | 1097 | 1098 | 1099 | 1100 | 1101 | 1102 | 1103 | 1104 | 1105 | 1106 | 1107 | 1108 | 1109 | 1110 | 1111 | 1112 | 1113 | 1114 | 1115 | 1116 | 1117 | 1118 | 1119 | 1120 | 1121 | 1122 | 1123 | 1124 | 1125 | 1126 | 1127 | 1128 | 1129 | 1130 | 1131 | 1132 | 1133 | 1134 | 1135 | 1136 | 1137 | 1138 | 1139 | 1140 | 1141 | 1142 | 1143 | 1144 | 1145 | 1146 | 1147 | 1148 | 1149 | 1150 | 1151 | 1152 | 1153 | 1154 | 1155 | 1156 | 1157 | 1158 | 1159 | 1160 | 1161 | 1162 | 1163 | 1164 | 1165 | 1166 | 1167 | 1168 | 1169 | 1170 | 1171 | 1172 | 1173 | 1174 | 1175 | 1176 | 1177 | 1178 | 1179 | 1180 | 1181 | 1182 | 1183 | 1184 | 1185 | 1186 | 1187 | 1188 | 1189 | 1190 | 1191 | 1192 | 1193 | 1194 | 1195 | 1196 | 1197 | 1198 | 1199 | 1200 | 1201 | 1202 | 1203 | 1204 | 1205 | 1206 | 1207 | 1208 | 1209 | 1210 | 1211 | 1212 | 1213 | 1214 | 1215 | 1216 | 1217 | 1218 | 1219 | 1220 | 1221 | 1222 | 1223 | 1224 | 1225 | 1226 | 1227 | 1228 | 1229 | 1230 | 1231 | 1232 | 1233 | 1234 | 1235 | 1236 | 1237 | 1238 | 1239 | 1240 | 1241 | 1242 | 1243 | 1244 | 1245 | 1246 | 1247 | 1248 | 1249 | 1250 | 1251 | 1252 | 1253 | 1254 | 1255 | 1256 | 1257 | 1258 | 1259 | 1260 | 1261 | 1262 | 1263 | 1264 | 1265 | 1266 | 1267 | 1268 | 1269 | 1270 | 1271 | 1272 | 1273 | 1274 | 1275 | 1276 | 1277 | 1278 | 1279 | 1280 | 1281 | 1282 | 1283 | 1284 | 1285 | 1286 | 1287 | 1288 | 1289 | 1290 | 1291 | 1292 | 1293 | 1294 | 1295 | 1296 | 1297 | 1298 | 1299 | 1300 | 1301 | 1302 | 1303 | 1304 | 1305 | 1306 | 1307 | 1308 | 1309 | 1310 | 1311 | 1312 | 1313 | 1314 | 1315 | 1316 | 1317 | 1318 | 1319 | 1320 | 1321 | 1322 | 1323 | 1324 | 1325 | 1326 | 1327 | 1328 | 1329 | 1330 | 1331 | 1332 | 1333 | 1334 | 1335 | 1336 | 1337 | 1338 | 1339 | 1340 | 1341 | 1342 | 1343 | 1344 | 1345 | 1346 | 1347 | 1348 | 1349 | 1350 | 1351 | 1352 | 1353 | 1354 | 1355 | 1356 | 1357 | 1358 | 1359 | 1360 | 1361 | 1362 | 1363 | 1364 | 1365 | 1366 | 1367 | 1368 | 1369 | 1370 | 1371 | 1372 | 1373 | 1374 | 1375 | 1376 | 1377 | 1378 | 1379 | 1380 | 1381 | 1382 | 1383 | 1384 | 1385 | 1386 | 1387 | 1388 | 1389 | 1390 | 1391 | 1392 | 1393 | 1394 | 1395 | 1396 | 1397 | 1398 | 1399 | 1400 | 1401 | 1402 | 1403 | 1404 | 1405 | 1406 | 1407 | 1408 | 1409 | 1410 | 1411 | 1412 | 1413 | 1414 | 1415 | 1416 | 1417 | 1418 | 1419 | 1420 | 1421 | 1422 | 1423 | 1424 | 1425 | 1426 | 1427 | 1428 | 1429 | 1430 | 1431 | 1432 | 1433 | 1434 | 1435 | 1436 | 1437 | 1438 | 1439 | 1440 | 1441 | 1442 | 1443 | 1444 | 1445 | 1446 | 1447 | 1448 | 1449 | 1450 | 1451 | 1452 | 1453 | 1454 | 1455 | 1456 | 1457 | 1458 | 1459 | 1460 | 1461 | 1462 | 1463 | 1464 | 1465 | 1466 | 1467 | 1468 | 1469 | 1470 | 1471 | 1472 | 1473 | 1474 | 1475 | 1476 | 1477 | 1478 | 1479 | 1480 | 1481 | 1482 | 1483 | 1484 | 1485 | 1486 | 1487 | 1488 | 1489 | 1490 | 1491 | 1492 | 1493 | 1494 | 1495 | 1496 | 1497 | 1498 | 149 |
|---|---|---|---|---|---|---|---|---|----|----|----|----|----|----|----|----|----|----|----|----|----|----|----|----|----|----|----|----|----|----|----|----|----|----|----|----|----|----|----|----|----|----|----|----|----|----|----|----|----|----|----|----|----|----|----|----|----|----|----|----|----|----|----|----|----|----|----|----|----|----|----|----|----|----|----|----|----|----|----|----|----|----|----|----|----|----|----|----|----|----|----|----|----|----|----|----|----|----|-----|-----|-----|-----|-----|-----|-----|-----|-----|-----|-----|-----|-----|-----|-----|-----|-----|-----|-----|-----|-----|-----|-----|-----|-----|-----|-----|-----|-----|-----|-----|-----|-----|-----|-----|-----|-----|-----|-----|-----|-----|-----|-----|-----|-----|-----|-----|-----|-----|-----|-----|-----|-----|-----|-----|-----|-----|-----|-----|-----|-----|-----|-----|-----|-----|-----|-----|-----|-----|-----|-----|-----|-----|-----|-----|-----|-----|-----|-----|-----|-----|-----|-----|-----|-----|-----|-----|-----|-----|-----|-----|-----|-----|-----|-----|-----|-----|-----|-----|-----|-----|-----|-----|-----|-----|-----|-----|-----|-----|-----|-----|-----|-----|-----|-----|-----|-----|-----|-----|-----|-----|-----|-----|-----|-----|-----|-----|-----|-----|-----|-----|-----|-----|-----|-----|-----|-----|-----|-----|-----|-----|-----|-----|-----|-----|-----|-----|-----|-----|-----|-----|-----|-----|-----|-----|-----|-----|-----|-----|-----|-----|-----|-----|-----|-----|-----|-----|-----|-----|-----|-----|-----|-----|-----|-----|-----|-----|-----|-----|-----|-----|-----|-----|-----|-----|-----|-----|-----|-----|-----|-----|-----|-----|-----|-----|-----|-----|-----|-----|-----|-----|-----|-----|-----|-----|-----|-----|-----|-----|-----|-----|-----|-----|-----|-----|-----|-----|-----|-----|-----|-----|-----|-----|-----|-----|-----|-----|-----|-----|-----|-----|-----|-----|-----|-----|-----|-----|-----|-----|-----|-----|-----|-----|-----|-----|-----|-----|-----|-----|-----|-----|-----|-----|-----|-----|-----|-----|-----|-----|-----|-----|-----|-----|-----|-----|-----|-----|-----|-----|-----|-----|-----|-----|-----|-----|-----|-----|-----|-----|-----|-----|-----|-----|-----|-----|-----|-----|-----|-----|-----|-----|-----|-----|-----|-----|-----|-----|-----|-----|-----|-----|-----|-----|-----|-----|-----|-----|-----|-----|-----|-----|-----|-----|-----|-----|-----|-----|-----|-----|-----|-----|-----|-----|-----|-----|-----|-----|-----|-----|-----|-----|-----|-----|-----|-----|-----|-----|-----|-----|-----|-----|-----|-----|-----|-----|-----|-----|-----|-----|-----|-----|-----|-----|-----|-----|-----|-----|-----|-----|-----|-----|-----|-----|-----|-----|-----|-----|-----|-----|-----|-----|-----|-----|-----|-----|-----|-----|-----|-----|-----|-----|-----|-----|-----|-----|-----|-----|-----|-----|-----|-----|-----|-----|-----|-----|-----|-----|-----|-----|-----|-----|-----|-----|-----|-----|-----|-----|-----|-----|-----|-----|-----|-----|-----|-----|-----|-----|-----|-----|-----|-----|-----|-----|-----|-----|-----|-----|-----|-----|-----|-----|-----|-----|-----|-----|-----|-----|-----|-----|-----|-----|-----|-----|-----|-----|-----|-----|-----|-----|-----|-----|-----|-----|-----|-----|-----|-----|-----|-----|-----|-----|-----|-----|-----|-----|-----|-----|-----|-----|-----|-----|-----|-----|-----|-----|-----|-----|-----|-----|-----|-----|-----|-----|-----|-----|-----|-----|-----|-----|-----|-----|-----|-----|-----|-----|-----|-----|-----|-----|-----|-----|-----|-----|-----|-----|-----|-----|-----|-----|-----|-----|-----|-----|-----|-----|-----|-----|-----|-----|-----|-----|-----|-----|-----|-----|-----|-----|-----|-----|-----|-----|-----|-----|-----|-----|-----|-----|-----|-----|-----|-----|-----|-----|-----|-----|-----|-----|-----|-----|-----|-----|-----|-----|-----|-----|-----|-----|-----|-----|-----|-----|-----|-----|-----|-----|-----|-----|-----|-----|-----|-----|-----|-----|-----|-----|-----|-----|-----|-----|-----|-----|-----|-----|-----|-----|-----|-----|-----|-----|-----|-----|-----|-----|-----|-----|-----|-----|-----|-----|-----|-----|-----|-----|-----|-----|-----|-----|-----|-----|-----|-----|-----|-----|-----|-----|-----|-----|-----|-----|-----|-----|-----|-----|-----|-----|-----|-----|-----|-----|-----|-----|-----|-----|-----|-----|-----|-----|-----|-----|-----|-----|-----|-----|-----|-----|-----|-----|-----|-----|-----|-----|-----|-----|-----|-----|-----|-----|-----|-----|-----|-----|-----|-----|-----|-----|-----|-----|-----|-----|-----|-----|-----|-----|-----|-----|-----|-----|-----|-----|-----|-----|-----|-----|-----|-----|-----|-----|-----|-----|-----|-----|-----|-----|-----|-----|-----|-----|-----|-----|-----|-----|-----|-----|-----|-----|-----|-----|-----|-----|-----|-----|-----|-----|-----|-----|-----|-----|-----|-----|-----|-----|-----|-----|-----|-----|-----|-----|-----|-----|-----|-----|-----|-----|-----|-----|-----|-----|-----|-----|-----|-----|-----|-----|-----|-----|-----|-----|-----|-----|-----|-----|-----|-----|-----|-----|-----|-----|-----|-----|-----|-----|-----|-----|-----|-----|-----|-----|-----|-----|-----|-----|-----|-----|-----|-----|-----|-----|-----|-----|-----|-----|-----|-----|-----|-----|-----|-----|-----|-----|-----|-----|-----|-----|-----|-----|-----|-----|-----|-----|-----|-----|-----|-----|-----|-----|-----|-----|-----|-----|-----|-----|-----|-----|-----|-----|-----|-----|-----|-----|-----|-----|-----|-----|-----|-----|-----|-----|-----|-----|-----|-----|-----|-----|-----|-----|-----|-----|-----|-----|-----|-----|-----|-----|-----|-----|-----|-----|-----|-----|-----|-----|-----|-----|-----|-----|-----|-----|-----|-----|-----|-----|-----|-----|-----|-----|-----|-----|-----|-----|-----|-----|-----|-----|-----|-----|-----|-----|-----|-----|-----|-----|-----|-----|-----|-----|-----|-----|-----|-----|-----|-----|-----|-----|-----|-----|-----|-----|-----|-----|-----|------|------|------|------|------|------|------|------|------|------|------|------|------|------|------|------|------|------|------|------|------|------|------|------|------|------|------|------|------|------|------|------|------|------|------|------|------|------|------|------|------|------|------|------|------|------|------|------|------|------|------|------|------|------|------|------|------|------|------|------|------|------|------|------|------|------|------|------|------|------|------|------|------|------|------|------|------|------|------|------|------|------|------|------|------|------|------|------|------|------|------|------|------|------|------|------|------|------|------|------|------|------|------|------|------|------|------|------|------|------|------|------|------|------|------|------|------|------|------|------|------|------|------|------|------|------|------|------|------|------|------|------|------|------|------|------|------|------|------|------|------|------|------|------|------|------|------|------|------|------|------|------|------|------|------|------|------|------|------|------|------|------|------|------|------|------|------|------|------|------|------|------|------|------|------|------|------|------|------|------|------|------|------|------|------|------|------|------|------|------|------|------|------|------|------|------|------|------|------|------|------|------|------|------|------|------|------|------|------|------|------|------|------|------|------|------|------|------|------|------|------|------|------|------|------|------|------|------|------|------|------|------|------|------|------|------|------|------|------|------|------|------|------|------|------|------|------|------|------|------|------|------|------|------|------|------|------|------|------|------|------|------|------|------|------|------|------|------|------|------|------|------|------|------|------|------|------|------|------|------|------|------|------|------|------|------|------|------|------|------|------|------|------|------|------|------|------|------|------|------|------|------|------|------|------|------|------|------|------|------|------|------|------|------|------|------|------|------|------|------|------|------|------|------|------|------|------|------|------|------|------|------|------|------|------|------|------|------|------|------|------|------|------|------|------|------|------|------|------|------|------|------|------|------|------|------|------|------|------|------|------|------|------|------|------|------|------|------|------|------|------|------|------|------|------|------|------|------|------|------|------|------|------|------|------|------|------|------|------|------|------|------|------|------|------|------|------|------|------|------|------|------|------|------|------|------|------|------|------|------|------|------|------|------|------|------|------|------|------|------|------|------|------|------|------|------|------|------|------|------|------|------|------|------|------|------|------|------|------|------|------|------|------|------|------|------|------|------|------|------|------|------|------|------|------|------|------|------|------|------|------|------|------|------|------|------|------|------|------|------|------|------|------|------|------|------|------|------|------|------|------|------|------|------|------|------|------|------|------|------|------|------|------|------|------|------|------|------|------|-----|



| LFQ intens |
|------------|------------|------------|------------|------------|------------|------------|------------|------------|
| 31,03118   | 32,02697   | 32,30549   | 28,31095   | 28,08035   | 29,06669   | 28,91336   | 20,79574   | 24,09746   |
| 24,49698   | 28,37501   | 30,17415   | 21,70664   | 24,67246   | 22,18999   | 22,98011   | 22,38854   | 22,66983   |
| 33,83921   | 33,80713   | 34,3397    | 31,56883   | 31,73376   | 32,68712   | 32,62625   | 29,26591   | 27,52992   |
| 21,99236   | 23,77998   | 23,67256   | 20,3393    | 20,89156   | 21,14923   | 20,90991   | 20,98905   | 21,36959   |
| 22,19592   | 22,21376   | 21,9892    | 22,62654   | 23,66371   | 22,6054    | 22,51538   | 23,07883   | 23,2337    |
| 33,43204   | 33,12132   | 33,52426   | 34,14444   | 34,1734    | 33,66034   | 33,77686   | 34,1496    | 34,19638   |
| 33,44233   | 33,07312   | 33,15658   | 32,61617   | 32,74256   | 33,55408   | 33,48424   | 32,51371   | 32,86356   |
| 24,54144   | 24,05358   | 24,24405   | 26,21647   | 26,88285   | 23,95601   | 23,44199   | 25,95476   | 26,61077   |
| 27,09295   | 26,39926   | 26,58606   | 28,29824   | 28,05274   | 26,49989   | 26,80193   | 28,56384   | 28,69026   |
| 28,65492   | 30,31646   | 29,05628   | 27,62944   | 27,36328   | 25,98713   | 27,53282   | 24,71282   | 25,02129   |
| 22,87401   | 22,50927   | 23,7104    | 24,00533   | 25,3654    | 23,46208   | 26,69856   | 27,58857   | 27,57975   |
| 24,83543   | 25,70187   | 25,88129   | 28,09989   | 27,96157   | 27,57521   | 27,98994   | 28,46045   | 28,40068   |
| 30,49037   | 30,49486   | 30,10011   | 30,22458   | 30,02314   | 29,36208   | 29,68611   | 29,85046   | 29,70337   |
| 30,69594   | 30,59067   | 30,49295   | 30,91663   | 30,91748   | 30,831     | 30,68361   | 31,33527   | 31,499     |
| 34,12325   | 32,30138   | 33,52869   | 33,55225   | 33,47255   | 32,45425   | 32,37485   | 31,58352   | 31,52687   |
| 25,75524   | 24,58153   | 26,69803   | 29,68005   | 28,98682   | 23,46787   | 24,53582   | 27,83545   | 27,79228   |
| 30,29351   | 30,37098   | 30,32034   | 29,59586   | 29,41542   | 29,22338   | 29,18959   | 28,92872   | 28,58043   |
| 28,33769   | 28,78279   | 28,03837   | 26,8832    | 27,00131   | 27,44979   | 27,41224   | 27,20602   | 27,0276    |
| 31,38469   | 31,11873   | 31,19578   | 31,53723   | 31,60116   | 31,29576   | 31,11471   | 32,09704   | 32,07728   |
| 28,95074   | 29,18386   | 29,2963    | 28,62383   | 28,84107   | 29,17331   | 29,1775    | 28,1155    | 28,13951   |
| 25,5526    | 23,09792   | 24,06357   | 27,97301   | 27,77335   | 26,13055   | 25,72093   | 27,91296   | 27,27293   |
| 22,48696   | 23,48598   | 22,96295   | 25,59269   | 25,5305    | 25,10185   | 25,35279   | 24,66536   | 25,05383   |
| 27,49579   | 26,13406   | 25,21182   | 26,31403   | 26,73376   | 27,57087   | 27,8052    | 28,65363   | 28,81427   |
| 24,22059   | 25,35528   | 25,29018   | 24,60156   | 24,26556   | 24,5428    | 24,76157   | 24,10556   | 22,01563   |
| 27,54399   | 25,67411   | 26,14766   | 27,58628   | 27,5059    | 27,32174   | 27,3808    | 28,95366   | 29,51783   |
| 22,40098   | 23,81693   | 23,63272   | 26,63145   | 26,90392   | 27,20909   | 22,62445   | 26,7656    | 26,85222   |
| 22,22519   | 24,05714   | 23,08479   | 20,84115   | 20,80986   | 20,17731   | 20,20192   | 21,1201    | 21,69238   |
| 25,24107   | 23,69519   | 23,87995   | 25,01504   | 24,50355   | 23,90812   | 24,18526   | 26,31443   | 26,06079   |
| 27,68759   | 27,50385   | 28,24354   | 28,02189   | 26,97913   | 26,97978   | 27,68746   | 26,87467   | 26,90323   |
| 27,75513   | 28,21183   | 27,7604    | 26,90529   | 26,82905   | 27,53646   | 26,94905   | 26,56261   | 26,16398   |
| 29,76917   | 28,95427   | 28,57236   | 29,82902   | 30,14722   | 29,61994   | 30,10762   | 31,08759   | 31,39622   |
| 22,7308    | 23,63123   | 24,27583   | 26,40868   | 26,53424   | 27,85412   | 27,98462   | 27,96505   | 27,55311   |
| 26,73104   | 25,19689   | 24,38988   | 22,31128   | 25,25555   | 24,68581   | 23,04007   | 23,24094   | 22,1104    |
| 23,23996   | 24,51734   | 23,0489    | 24,38555   | 22,96906   | 23,09225   | 23,3615    | 21,63014   | 21,64979   |
| 28,62048   | 28,59463   | 28,16322   | 28,52099   | 28,36035   | 28,34617   | 28,57015   | 27,47212   | 27,3232    |
| 30,49895   | 30,54563   | 31,03636   | 31,73884   | 31,96558   | 31,36124   | 31,4488    | 31,45983   | 31,59072   |
| 23,25643   | 23,04572   | 22,66345   | 23,46148   | 22,90094   | 23,43582   | 23,54321   | 24,35057   | 24,77258   |
| 30,53399   | 31,64255   | 31,45988   | 32,47361   | 31,34022   | 21,94433   | 30,41901   | 30,48693   | 23,17258   |
| 23,27266   | 23,05515   | 24,49419   | 28,20527   | 23,44089   | 22,41971   | 23,52586   | 28,58692   | 28,11098   |
| 27,87473   | 26,84828   | 26,64403   | 24,01014   | 22,0047    | 23,69696   | 22,98111   | 23,15847   | 24,53848   |
| 26,06747   | 26,14028   | 26,19261   | 25,5405    | 24,27242   | 24,804     | 22,52962   | 23,97202   | 24,54699   |
| 33,84633   | 33,18176   | 32,9191    | 34,94026   | 34,86277   | 34,7928    | 34,7456    | 34,83479   | 34,94576   |
| 30,52673   | 30,50503   | 30,39479   | 30,92741   | 30,84236   | 31,31484   | 31,244     | 31,09213   | 31,13589   |
| 28,80999   | 28,71509   | 28,60918   | 28,03239   | 28,31825   | 28,30138   | 28,43583   | 29,45138   | 29,59557   |
| 21,08503   | 22,76161   | 23,87801   | 23,80747   | 22,82011   | 21,57761   | 22,86011   | 27,84356   | 27,88681   |
| 29,0598    | 29,72306   | 29,90124   | 28,15528   | 28,18253   | 29,42274   | 29,04757   | 27,12495   | 27,30496   |
| 22,41892   | 21,9556    | 26,00719   | 26,80587   | 27,00089   | 26,6245    | 26,67681   | 26,63506   | 26,22015   |
| 31,72082   | 30,41649   | 30,87298   | 32,31355   | 32,22556   | 30,76975   | 31,00691   | 32,54494   | 32,64534   |
| 32,43964   | 31,66072   | 31,17665   | 34,3535    | 34,38985   | 33,92344   | 33,84763   | 34,53907   | 34,4746    |



|          |          |          |          |          |          |          |          |          |
|----------|----------|----------|----------|----------|----------|----------|----------|----------|
| 31,91812 | 31,49729 | 31,76746 | 31,74021 | 32,05985 | 32,19759 | 32,46127 | 32,38785 | 32,43547 |
| 28,07572 | 28,64599 | 30,51625 | 25,26263 | 24,3812  | 26,74098 | 27,54458 | 24,61745 | 25,62589 |
| 28,97509 | 28,84161 | 27,99226 | 28,70902 | 29,11279 | 29,50673 | 29,20676 | 29,74953 | 29,41581 |
| 32,24073 | 32,4552  | 32,24505 | 30,98346 | 31,16423 | 32,62991 | 32,65057 | 31,34409 | 31,77999 |
| 28,89357 | 28,32582 | 28,6976  | 29,45996 | 29,7921  | 29,70604 | 29,07184 | 30,20455 | 30,12842 |
| 22,69794 | 22,9823  | 25,89069 | 26,70807 | 25,99596 | 21,42328 | 25,08148 | 26,87091 | 26,11504 |
| 28,86847 | 25,22255 | 23,93872 | 28,67949 | 28,82271 | 28,34875 | 28,94827 | 29,42582 | 30,35174 |
| 27,409   | 29,02929 | 28,78812 | 26,86962 | 27,06589 | 28,87678 | 28,89235 | 26,98    | 26,92343 |
| 21,14364 | 22,45959 | 21,6066  | 23,11883 | 23,52409 | 21,33205 | 22,62649 | 23,46276 | 23,12591 |
| 28,45591 | 27,97115 | 25,94675 | 30,13931 | 30,33543 | 29,29721 | 29,07702 | 30,74671 | 30,57362 |
| 29,18348 | 29,40099 | 28,37952 | 29,30898 | 29,31954 | 29,29999 | 29,52232 | 30,40304 | 30,03486 |
| 22,35912 | 23,95871 | 21,64258 | 23,57819 | 22,99253 | 21,29182 | 21,36832 | 24,78731 | 24,35057 |
| 29,74069 | 27,99857 | 28,44221 | 29,78396 | 29,52427 | 29,45252 | 29,43796 | 30,38915 | 30,22768 |
| 23,89384 | 24,98298 | 24,33845 | 23,1695  | 22,83973 | 24,19528 | 24,15267 | 22,20413 | 22,43987 |
| 27,79371 | 27,19094 | 27,70372 | 28,74622 | 29,1228  | 28,4729  | 28,49102 | 29,57782 | 29,8098  |
| 28,4394  | 29,1112  | 29,40734 | 28,72994 | 28,32444 | 28,37886 | 27,92914 | 26,89504 | 27,72286 |
| 29,42906 | 29,21403 | 29,45862 | 29,81929 | 30,12657 | 29,93551 | 29,57002 | 29,90985 | 30,32152 |
| 25,23356 | 26,33668 | 24,68886 | 24,4084  | 24,56209 | 26,16092 | 25,99401 | 23,71963 | 24,19764 |
| 24,86815 | 25,55318 | 24,44979 | 26,60399 | 26,9215  | 27,41828 | 26,91969 | 25,86976 | 26,79687 |
| 22,39099 | 22,82568 | 23,34163 | 29,5508  | 30,38618 | 27,79123 | 22,99408 | 31,32254 | 31,28312 |
| 23,98237 | 23,15892 | 23,08046 | 28,98454 | 28,68949 | 22,54555 | 22,31535 | 29,65041 | 29,91613 |
| 22,87294 | 22,8583  | 23,72993 | 27,1518  | 23,52378 | 22,30649 | 21,8716  | 28,1249  | 28,01036 |
| 24,52641 | 24,32745 | 22,21216 | 29,76836 | 29,95754 | 30,88103 | 31,05601 | 30,82533 | 29,67459 |
| 27,32672 | 27,07816 | 27,07908 | 23,25214 | 21,07985 | 26,08558 | 22,13194 | 20,47863 | 22,74585 |
| 27,87079 | 28,04323 | 27,51668 | 27,61996 | 27,93326 | 27,3379  | 27,7082  | 29,23938 | 29,22041 |

| LFQ intens | LFQ intens | Potential c | Student's T | Student's T | Peptides | Razor + un | Unique peptides | Sequence |
|------------|------------|-------------|-------------|-------------|----------|------------|-----------------|----------|
| 22,47785   | 30,51427   | +           | +           | 1_3         | 29       | 17         | 3               | 46,1     |
| 22,98594   | 25,6666    | +           | +           | 1_3         | 24       | 13         | 13              | 55       |
| 27,7845    | 34,07933   | +           | +           | 1_3         | 34       | 34         | 8               | 45,3     |
| 21,7265    | 20,35057   |             | +           | 1_3         | 2        | 2          | 2               | 18,8     |
| 23,09436   | 24,24235   |             | +           | 1_3         | 3        | 3          | 3               | 5,1      |
| 34,17042   | 33,84652   |             | +           | 1_3         | 70       | 70         | 70              | 51,8     |
| 32,66465   | 32,65151   |             | +           | 1_3         | 21       | 21         | 6               | 63,5     |
| 26,17122   | 25,20165   |             | +           | 1_3         | 5        | 5          | 5               | 6,2      |
| 28,50199   | 28,15764   |             | +           | 1_3         | 11       | 11         | 11              | 20,3     |
| 21,99211   | 27,43643   |             | +           | 1_3         | 10       | 10         | 10              | 29,8     |
| 28,20741   | 25,89396   |             | +           | 1_3         | 8        | 8          | 8               | 14,8     |
| 27,99145   | 27,2674    |             | +           | 1_3         | 26       | 26         | 24              | 21,6     |
| 29,78757   | 29,64566   |             | +           | 1_3         | 7        | 7          | 7               | 50,7     |
| 31,20432   | 31,15551   |             | +           | 1_3         | 15       | 15         | 7               | 46,7     |
| 31,4446    | 31,74186   |             | +           | 1_3         | 16       | 16         | 16              | 42       |
| 28,11083   | 27,75443   |             | +           | 1_3         | 11       | 11         | 11              | 39       |
| 28,83533   | 29,82773   |             | +           | 1_3         | 11       | 10         | 10              | 39,3     |
| 27,06497   | 27,54687   |             | +           | 1_3         | 9        | 9          | 9               | 30,1     |
| 32,10793   | 32,37233   |             | +           | 1_3         | 22       | 22         | 22              | 54,9     |
| 27,87085   | 28,74871   |             | +           | 1_3         | 9        | 9          | 9               | 36,2     |
| 27,05258   | 26,74098   |             | +           | 1_3         | 5        | 5          | 5               | 45,8     |
| 24,57306   | 24,00873   |             | +           | 1_3         | 5        | 5          | 5               | 15       |
| 28,65591   | 27,46544   |             | +           | 1_3         | 8        | 8          | 8               | 11,1     |
| 22,38684   | 22,3639    |             | +           | 1_3         | 4        | 4          | 3               | 10,7     |
| 28,57841   | 27,46669   |             | +           | 1_3         | 15       | 15         | 15              | 18       |
| 27,10059   | 25,79726   |             | +           | 1_3         | 7        | 7          | 7               | 16       |
| 21,42224   | 19,70838   |             | +           | 1_3         | 2        | 2          | 2               | 26,9     |
| 25,89375   | 25,32711   |             | +           | 1_3         | 6        | 6          | 6               | 35,2     |
| 26,86962   | 27,13985   |             | +           | 1_3         | 14       | 14         | 14              | 17,7     |
| 26,27837   | 27,31769   |             | +           | 1_3         | 25       | 24         | 24              | 15,3     |
| 30,8017    | 30,96237   |             | +           | 1_3         | 8        | 8          | 8               | 53,4     |
| 27,3946    | 27,05765   |             | +           | 1_3         | 13       | 13         | 13              | 5,9      |
| 22,87529   | 22,73595   |             | +           | 1_3         | 4        | 4          | 4               | 14,1     |
| 21,57464   | 22,0971    |             | +           | 1_3         | 2        | 2          | 2               | 12       |
| 27,91239   | 27,94665   |             | +           | 1_3         | 12       | 12         | 12              | 25,8     |
| 31,81867   | 31,29975   |             | +           | 1_3         | 16       | 16         | 13              | 59,3     |
| 24,82182   | 23,49875   |             | +           | 1_3         | 5        | 5          | 5               | 4,1      |
| 22,25546   | 22,98968   |             | +           | 1_3         | 1        | 1          | 1               | 4,9      |
| 28,78924   | 27,59662   |             | +           | 1_3         | 3        | 3          | 3               | 25,7     |
| 23,00949   | 22,52667   |             | +           | 1_3         | 3        | 3          | 3               | 9,7      |
| 23,93957   | 25,17268   |             | +           | 1_3         | 4        | 4          | 4               | 25,8     |
| 34,96456   | 35,41516   |             | +           | 1_3         | 5        | 5          | 5               | 43,7     |
| 31,04785   | 30,74214   |             | +           | 1_3         | 14       | 11         | 9               | 55,5     |
| 29,28701   | 29,04679   |             | +           | 1_3         | 7        | 7          | 7               | 17,1     |
| 27,65055   | 23,1283    |             | +           | 1_3         | 7        | 5          | 5               | 18,3     |
| 27,57795   | 29,18182   |             | +           | 1_3         | 6        | 6          | 1               | 46,6     |
| 27,09225   | 28,22246   |             | +           | 1_3         | 3        | 3          | 3               | 5,5      |
| 32,44586   | 31,76228   |             | +           | 1_3         | 24       | 24         | 22              | 52,5     |
| 34,5739    | 34,16121   |             | +           | 1_3         | 22       | 22         | 22              | 49,7     |

|          |          |   |     |    |    |    |      |
|----------|----------|---|-----|----|----|----|------|
| 32,60213 | 32,57786 | + | 1_3 | 16 | 16 | 16 | 58,4 |
| 22,94758 | 26,84122 | + | 1_3 | 13 | 13 | 13 | 15,3 |
| 30,00945 | 29,20506 | + | 1_3 | 15 | 15 | 14 | 11,9 |
| 31,54209 | 30,68813 | + | 1_3 | 22 | 22 | 22 | 41,3 |
| 29,96472 | 30,12312 | + | 1_3 | 8  | 8  | 8  | 29,9 |
| 25,49308 | 26,83062 | + | 1_3 | 3  | 3  | 3  | 8,4  |
| 30,30726 | 29,43418 | + | 1_3 | 28 | 28 | 28 | 17,4 |
| 26,47011 | 27,54532 | + | 1_3 | 16 | 16 | 16 | 17,9 |
| 22,41431 | 22,69217 | + | 1_3 | 5  | 5  | 5  | 11,5 |
| 30,34742 | 29,24407 | + | 1_3 | 14 | 14 | 14 | 15,9 |
| 29,72728 | 30,19507 | + | 1_3 | 9  | 9  | 9  | 29,4 |
| 24,67632 | 24,27049 | + | 1_3 | 7  | 7  | 7  | 7,9  |
| 30,00223 | 29,88217 | + | 1_3 | 16 | 16 | 16 | 28,4 |
| 22,24566 | 23,55415 | + | 1_3 | 3  | 3  | 3  | 34,1 |
| 28,83843 | 28,87059 | + | 1_3 | 7  | 7  | 7  | 37,1 |
| 27,25422 | 27,97208 | + | 1_3 | 18 | 18 | 18 | 27,5 |
| 30,01492 | 30,15846 | + | 1_3 | 10 | 10 | 1  | 43,1 |
| 23,18006 | 22,52028 | + | 1_3 | 4  | 4  | 4  | 17,4 |
| 26,64072 | 25,56842 | + | 1_3 | 6  | 6  | 6  | 34,8 |
| 30,96747 | 22,67339 | + | 1_3 | 3  | 3  | 1  | 20,3 |
| 29,75681 | 27,0701  | + | 1_3 | 13 | 8  | 0  | 39,6 |
| 28,1209  | 25,79025 | + | 1_3 | 2  | 1  | 0  | 12,2 |
| 29,61569 | 29,87948 | + | 1_3 | 18 | 18 | 17 | 36,4 |
| 22,94437 | 23,02712 | + | 1_3 | 8  | 1  | 1  | 82,7 |
| 29,24386 | 28,63159 | + | 1_3 | 12 | 12 | 12 | 41   |

| Unique + r | Unique sec | Mol. weight | Q-value  | Score  | Intensity | MS/MS | col      | iBAQ 1-1 | iBAQ 1-3 |
|------------|------------|-------------|----------|--------|-----------|-------|----------|----------|----------|
| 31,7       | 6,7        | 58,536      | 0        | 132,71 | 9,64E+09  | 86    | 53050000 | 60895000 |          |
| 34,5       | 34,5       | 51,267      | 0        | 187,1  | 1,04E+09  | 26    | 589190   | 5860500  |          |
| 45,3       | 9,3        | 62,378      | 0        | 323,31 | 6,27E+10  | 186   | 4,88E+08 | 2,73E+08 |          |
| 18,8       | 18,8       | 26,793      | 0        | 4,8618 | 17190000  | 16    | 64148    | 44043    |          |
| 5,1        | 5,1        | 94,411      | 0        | 5,6156 | 61725000  | 10    | 111380   | 169530   |          |
| 51,8       | 51,8       | 214,84      | 0        | 323,31 | 1,21E+11  | 873   | 1,62E+08 | 41900000 |          |
| 63,5       | 12,3       | 42,026      | 0        | 299,05 | 6,5E+10   | 215   | 4,69E+08 | 1,99E+08 |          |
| 6,2        | 6,2        | 116,43      | 0        | 15,039 | 3,87E+08  | 18    | 871770   | 230690   |          |
| 20,3       | 20,3       | 74,823      | 0        | 15,573 | 1,83E+09  | 39    | 3527200  | 1954600  |          |
| 29,8       | 29,8       | 41,174      | 0        | 13,75  | 1,99E+09  | 32    | 16969000 | 32253000 |          |
| 14,8       | 14,8       | 62,965      | 0        | 23,956 | 6,21E+08  | 21    | 0        | 0        |          |
| 21,6       | 20,5       | 187,15      | 0        | 220,13 | 1,57E+09  | 99    | 227840   | 107200   |          |
| 50,7       | 50,7       | 15,799      | 0        | 135,39 | 9,29E+09  | 132   | 2,94E+08 | 1,11E+08 |          |
| 46,7       | 15,5       | 36,154      | 0        | 269,99 | 1,65E+10  | 146   | 97461000 | 12038000 |          |
| 42         | 42         | 53,981      | 0        | 323,31 | 6,47E+10  | 186   | 1,07E+09 | 1,67E+08 |          |
| 39         | 39         | 46,611      | 0        | 119,95 | 1,95E+09  | 76    | 3136400  | 373360   |          |
| 35,8       | 35,8       | 37,294      | 0        | 196,48 | 6,44E+09  | 90    | 1,13E+08 | 60047000 |          |
| 30,1       | 30,1       | 44,552      | 0        | 30,727 | 1,61E+09  | 49    | 25298000 | 13145000 |          |
| 54,9       | 54,9       | 47,472      | 0        | 221,05 | 2,57E+10  | 201   | 56633000 | 29258000 |          |
| 36,2       | 36,2       | 35,936      | 0        | 24,174 | 3,46E+09  | 64    | 22675000 | 15380000 |          |
| 45,8       | 45,8       | 11,301      | 0        | 50,679 | 9,18E+08  | 36    | 4136500  | 37048    |          |
| 15         | 15         | 57,519      | 0        | 7,4178 | 1,92E+08  | 16    | 0        | 0        |          |
| 11,1       | 11,1       | 108,34      | 0        | 106,17 | 1,71E+09  | 49    | 3170500  | 255080   |          |
| 10,7       | 8,6        | 70,289      | 0        | 49,458 | 1,44E+08  | 16    | 321640   | 435020   |          |
| 18         | 18         | 122,02      | 0        | 73,637 | 2,05E+09  | 74    | 2874900  | 72081    |          |
| 16         | 16         | 57,936      | 0        | 6,1243 | 6,01E+08  | 19    | 733900   | 0        |          |
| 26,9       | 26,9       | 16,729      | 0        | 13,145 | 12704000  | 11    | 100530   | 0        |          |
| 35,2       | 35,2       | 20,195      | 0        | 36,023 | 2,77E+08  | 23    | 1245600  | 1639600  |          |
| 17,7       | 17,7       | 106,78      | 0        | 51,324 | 1,47E+09  | 59    | 6993100  | 634840   |          |
| 15         | 15         | 277,5       | 0        | 47,411 | 1,13E+09  | 69    | 869610   | 274400   |          |
| 53,4       | 53,4       | 14,374      | 0        | 29,647 | 1E+10     | 38    | 95637000 | 32647000 |          |
| 5,9        | 5,9        | 337,08      | 0        | 41,513 | 1,03E+09  | 34    | 237820   | 160850   |          |
| 14,1       | 14,1       | 45,421      | 0        | 6,8391 | 2,13E+08  | 8     | 9112400  | 44635    |          |
| 12         | 12         | 26,425      | 0        | 6,001  | 47823000  | 6     | 1015500  | 284770   |          |
| 25,8       | 25,8       | 67,877      | 0        | 41,025 | 2,24E+09  | 49    | 10391000 | 13131000 |          |
| 59,3       | 49,2       | 27,774      | 0        | 215,13 | 2,23E+10  | 164   | 1,68E+08 | 80143000 |          |
| 4,1        | 4,1        | 138,91      | 0        | 11,174 | 99376000  | 11    | 709760   | 0        |          |
| 4,9        | 4,9        | 53,119      | 0,007813 | 1,5315 | 1,76E+10  | 10    | 87305000 | 1,11E+08 |          |
| 25,7       | 25,7       | 19,365      | 0        | 17,92  | 1,25E+09  | 12    | 0        | 0        |          |
| 9,7        | 9,7        | 51,853      | 0        | 5,2514 | 3,99E+08  | 5     | 9752800  | 3496400  |          |
| 25,8       | 25,8       | 20,7        | 0        | 11,647 | 2,9E+08   | 17    | 7189200  | 2780300  |          |
| 43,7       | 43,7       | 13,714      | 0        | 140,96 | 2,01E+11  | 100   | 2,73E+09 | 7,9E+08  |          |
| 49,4       | 45,3       | 27,745      | 0        | 106,42 | 1,49E+10  | 87    | 74083000 | 51614000 |          |
| 17,1       | 17,1       | 55,394      | 0        | 28,686 | 3,58E+09  | 38    | 14707000 | 10814000 |          |
| 16         | 16         | 40,368      | 0        | 40,17  | 7,29E+08  | 18    | 1903000  | 277100   |          |
| 46,6       | 13,2       | 19,202      | 0        | 84,558 | 3,47E+09  | 35    | 37246000 | 61871000 |          |
| 5,5        | 5,5        | 70,169      | 0        | 9,1631 | 8,52E+08  | 16    | 1516000  | 725840   |          |
| 52,5       | 50,8       | 53,879      | 0        | 323,31 | 3,09E+10  | 218   | 1,29E+08 | 17027000 |          |
| 49,7       | 49,7       | 65,33       | 0        | 323,31 | 1,23E+11  | 243   | 2E+08    | 59886000 |          |

|      |      |        |   |        |          |     |          |          |
|------|------|--------|---|--------|----------|-----|----------|----------|
| 58,4 | 58,4 | 34,985 | 0 | 175,99 | 3,66E+10 | 166 | 1,12E+08 | 53009000 |
| 15,3 | 15,3 | 111,87 | 0 | 40,253 | 1,86E+09 | 33  | 9239900  | 5783600  |
| 11,9 | 11,5 | 189,24 | 0 | 122,13 | 4,78E+09 | 82  | 6085800  | 1337000  |
| 41,3 | 41,3 | 74,68  | 0 | 323,31 | 3,07E+10 | 260 | 2,4E+08  | 1,12E+08 |
| 29,9 | 29,9 | 40,876 | 0 | 39,226 | 6,46E+09 | 63  | 26180000 | 6088600  |
| 8,4  | 8,4  | 37,106 | 0 | 3,1167 | 4,69E+08 | 15  | 1428400  | 0        |
| 17,4 | 17,4 | 250,53 | 0 | 117,47 | 4,52E+09 | 135 | 9374900  | 102170   |
| 17,9 | 17,9 | 159,69 | 0 | 141,77 | 1,87E+09 | 82  | 3631400  | 4628600  |
| 11,5 | 11,5 | 57,929 | 0 | 5,5525 | 49544000 | 11  | 61890    | 0        |
| 15,9 | 15,9 | 130,93 | 0 | 106,13 | 6,76E+09 | 78  | 13404000 | 2328500  |
| 29,4 | 29,4 | 51,286 | 0 | 275,36 | 6,29E+09 | 60  | 36163000 | 13834000 |
| 7,9  | 7,9  | 144,37 | 0 | 15,203 | 91054000 | 25  | 40472    | 2135,8   |
| 28,4 | 28,4 | 85,206 | 0 | 183,26 | 6,39E+09 | 115 | 11127000 | 2828300  |
| 34,1 | 34,1 | 13,941 | 0 | 7,3546 | 98880000 | 17  | 457540   | 529600   |
| 37,1 | 37,1 | 23,031 | 0 | 11,535 | 3,44E+09 | 24  | 4439100  | 2042900  |
| 27,5 | 27,5 | 83,432 | 0 | 92,302 | 2,46E+09 | 69  | 8607800  | 13751000 |
| 43,1 | 2,6  | 38,39  | 0 | 226,3  | 7,48E+09 | 127 | 29603000 | 7991300  |
| 17,4 | 17,4 | 35,634 | 0 | 13,115 | 2,33E+08 | 21  | 4258900  | 6014000  |
| 34,8 | 34,8 | 24,093 | 0 | 11,912 | 6,03E+08 | 32  | 722330   | 1656600  |
| 20,3 | 11,6 | 14,813 | 0 | 41,996 | 6,83E+09 | 16  | 22583000 | 0        |
| 26,5 | 0    | 40,853 | 0 | 43,39  | 2,7E+09  | 34  | 0        | 0        |
| 6,1  | 0    | 21,216 | 0 | 6,2742 | 8,31E+08 | 8   | 3560700  | 839600   |
| 36,4 | 35   | 76,613 | 0 | 102,9  | 6,63E+09 | 108 | 572730   | 319880   |
| 20   | 20   | 7,99   | 0 | 16,266 | 6,66E+08 | 6   | 29338000 | 18754000 |
| 41   | 41   | 38,069 | 0 | 64,295 | 2,72E+09 | 54  | 13368000 | 2663600  |

| iBAQ 1-5 | iBAQ 2-1 | iBAQ 2-2 | iBAQ 2-3 | iBAQ 2-4 | iBAQ 3-1 | iBAQ 3-2 | iBAQ 3-3 | iBAQ 3-4 |
|----------|----------|----------|----------|----------|----------|----------|----------|----------|
| 97959000 | 7555900  | 4620300  | 20505000 | 16035000 | 28207    | 21636    | 24610    | 71577000 |
| 27575000 | 210850   | 461720   | 8027,8   | 43448    | 0        | 0        | 0        | 1083900  |
| 4,03E+08 | 65898000 | 50950000 | 1,09E+08 | 1,12E+08 | 11830000 | 4731800  | 3983700  | 5,01E+08 |
| 78521    | 64080    | 139190   | 143620   | 124760   | 89228    | 164760   | 177490   | 56133    |
| 0        | 230370   | 126850   | 164700   | 135830   | 159120   | 179900   | 151870   | 334010   |
| 52278000 | 1,62E+08 | 1,32E+08 | 81273000 | 82041000 | 2,05E+08 | 1,59E+08 | 1,5E+08  | 1,14E+08 |
| 2E+08    | 2,18E+08 | 1,91E+08 | 2,59E+08 | 2,69E+08 | 1,77E+08 | 1,89E+08 | 1,61E+08 | 1,68E+08 |
| 0        | 1967000  | 1524400  | 0        | 4279,3   | 1223100  | 902590   | 1676000  | 13886    |
| 639750   | 6368500  | 5430700  | 1430400  | 2615000  | 11815000 | 9264400  | 10239000 | 2180000  |
| 18283000 | 4233900  | 650300   | 226370   | 3595400  | 58313    | 0        | 0        | 10344000 |
| 0        | 9343,1   | 141610   | 9715,8   | 686790   | 5932600  | 4764000  | 7840100  | 24739    |
| 403000   | 2500100  | 1334000  | 1378500  | 1308900  | 3850300  | 1884600  | 2576400  | 658530   |
| 1,11E+08 | 1,08E+08 | 1,19E+08 | 1,06E+08 | 82367000 | 81481000 | 99246000 | 1,37E+08 | 79296000 |
| 38363000 | 96996000 | 89981000 | 48083000 | 39776000 | 1,26E+08 | 98471000 | 67365000 | 36460000 |
| 1,59E+08 | 3,83E+08 | 5,26E+08 | 1,52E+08 | 1,34E+08 | 1,12E+08 | 1,32E+08 | 40595000 | 65369000 |
| 4899900  | 37985000 | 38978000 | 131790   | 148490   | 4619400  | 5197000  | 12166000 | 6786300  |
| 47984000 | 33719000 | 11325000 | 13995000 | 28474000 | 15008000 | 19226000 | 12486000 | 23964000 |
| 9474200  | 4466100  | 4969200  | 4706900  | 4571000  | 4657000  | 4688800  | 3378700  | 5604800  |
| 30019000 | 65485000 | 89792000 | 52195000 | 55961000 | 1,92E+08 | 1,2E+08  | 1,97E+08 | 1E+08    |
| 17152000 | 23998000 | 13087000 | 14632000 | 14478000 | 7597800  | 4544800  | 5377200  | 18418000 |
| 643540   | 15559000 | 11083000 | 4065100  | 2373300  | 13966000 | 67739000 | 6657100  | 4849400  |
| 0        | 1918000  | 1511600  | 552490   | 640380   | 1071300  | 1375000  | 792110   | 150430   |
| 398550   | 1362900  | 584540   | 2554100  | 1024400  | 5081000  | 9786300  | 6024300  | 2069500  |
| 509920   | 1673100  | 350350   | 253220   | 301970   | 27477    | 10296    | 0        | 0        |
| 564620   | 2742100  | 951150   | 1184800  | 1042700  | 14862000 | 8506800  | 7509700  | 2337300  |
| 64855    | 1795100  | 4334600  | 229810   | 107300   | 3928000  | 4247600  | 2324300  | 432860   |
| 0        | 235270   | 204010   | 117010   | 93420    | 221170   | 313830   | 216280   | 86530    |
| 232680   | 886330   | 483090   | 178550   | 1638200  | 11482000 | 1409300  | 9706600  | 1869100  |
| 5683200  | 6872300  | 1801300  | 458650   | 1399800  | 1234300  | 1101400  | 2277800  | 2742400  |
| 1250000  | 726740   | 334760   | 1807200  | 721410   | 794420   | 429520   | 106020   | 1253900  |
| 29674000 | 80375000 | 1,16E+08 | 42079000 | 81811000 | 1,9E+08  | 2,94E+08 | 3,28E+08 | 1,43E+08 |
| 114580   | 511800   | 515550   | 841040   | 596960   | 1513900  | 1613200  | 382330   | 370260   |
| 17609    | 54107    | 1699900  | 897600   | 19699    | 6072,3   | 0        | 0        | 0        |
| 865890   | 939080   | 67069    | 33608    | 92605    | 237110   | 204290   | 169660   | 437960   |
| 7034500  | 12217000 | 2674500  | 8963800  | 9819600  | 5250600  | 2834400  | 8120600  | 8996500  |
| 1,01E+08 | 1,54E+08 | 1,76E+08 | 68020000 | 1,05E+08 | 1,41E+08 | 1,21E+08 | 1,93E+08 | 85416000 |
| 0        | 0        | 0        | 0        | 0        | 919880   | 91628    | 84405    | 69351    |
| 1,34E+08 | 2,39E+08 | 1,61E+08 | 71774000 | 45707000 | 84781000 | 39352000 | 80158000 | 46462000 |
| 105440   | 34258000 | 9122300  | 0        | 0        | 31512000 | 25213000 | 40969000 | 14786000 |
| 3898700  | 426320   | 0        | 239380   | 520440   | 662200   | 0        | 0        | 0        |
| 4583300  | 1771200  | 708920   | 423580   | 135310   | 1041400  | 2859000  | 1657300  | 5877900  |
| 8,16E+08 | 4,44E+09 | 3,85E+09 | 3E+09    | 3,04E+09 | 3,67E+09 | 3,43E+09 | 3,97E+09 | 3,71E+09 |
| 64358000 | 1,26E+08 | 1,05E+08 | 1,03E+08 | 1E+08    | 1,47E+08 | 1,21E+08 | 1,1E+08  | 59192000 |
| 11216000 | 10729000 | 6854500  | 7890300  | 8859200  | 22486000 | 31864000 | 9694800  | 7987600  |
| 0        | 6970200  | 1768200  | 1349200  | 785500   | 13768000 | 12798000 | 3233600  | 0        |
| 38834000 | 24155000 | 14584000 | 58162000 | 27051000 | 14253000 | 23726000 | 14500000 | 32792000 |
| 1262900  | 4497700  | 3815300  | 1429400  | 2603200  | 4132900  | 953940   | 4290500  | 3173600  |
| 32548000 | 1,44E+08 | 1,37E+08 | 29788000 | 30909000 | 1,87E+08 | 1,77E+08 | 1,51E+08 | 71265000 |
| 37044000 | 6,17E+08 | 6,56E+08 | 3,42E+08 | 3,78E+08 | 8,27E+08 | 5,07E+08 | 6,61E+08 | 4,61E+08 |

|          |          |          |          |          |          |          |          |          |
|----------|----------|----------|----------|----------|----------|----------|----------|----------|
| 89459000 | 2,27E+08 | 1,72E+08 | 80458000 | 1,9E+08  | 2,73E+08 | 77437000 | 2,05E+08 | 1,84E+08 |
| 10602000 | 682660   | 107950   | 3928300  | 1997000  | 157980   | 575110   | 13801    | 2641500  |
| 1267800  | 2882900  | 6371400  | 4784800  | 4056400  | 15235000 | 4018500  | 21550000 | 2641200  |
| 79332000 | 38383000 | 35204000 | 1,24E+08 | 93233000 | 64160000 | 79940000 | 1,1E+08  | 12496000 |
| 8828800  | 18841000 | 39162000 | 31162000 | 18598000 | 70020000 | 52721000 | 78125000 | 53814000 |
| 606330   | 1428800  | 705030   | 385330   | 366140   | 6432200  | 5349700  | 7451000  | 1874600  |
| 11247    | 2089000  | 4025700  | 2553100  | 389920   | 8701000  | 8097200  | 8049000  | 10453000 |
| 4508100  | 1681400  | 1779200  | 4359700  | 4883800  | 125270   | 1068700  | 781010   | 1739900  |
| 169680   | 356090   | 276600   | 30010    | 112440   | 333970   | 228640   | 180750   | 155470   |
| 594070   | 19758000 | 19612000 | 11722000 | 4948700  | 14865000 | 27437000 | 21406000 | 10862000 |
| 8268700  | 40633000 | 37509000 | 16472000 | 19337000 | 50362000 | 39359000 | 30740000 | 21783000 |
| 21210    | 126400   | 78488    | 13311    | 4421,6   | 397330   | 213590   | 275180   | 296080   |
| 4598400  | 18907000 | 12056000 | 11895000 | 10116000 | 32147000 | 25670000 | 21787000 | 12655000 |
| 380930   | 394450   | 233370   | 333960   | 298120   | 154210   | 2507900  | 5769400  | 1300500  |
| 8304200  | 29925000 | 25528000 | 23943000 | 6387100  | 53006000 | 50748000 | 40329000 | 20034000 |
| 5932800  | 8989800  | 4447200  | 8801900  | 5473300  | 4462300  | 4106700  | 282780   | 1566800  |
| 18015000 | 42766000 | 51836000 | 25624000 | 15732000 | 49831000 | 47011000 | 44505000 | 41083000 |
| 2969700  | 211360   | 210550   | 320570   | 293730   | 95702    | 57033    | 50182    | 59157    |
| 2198700  | 9511400  | 9987700  | 12240000 | 5983300  | 440490   | 4866300  | 4471200  | 2736900  |
| 17176000 | 2,09E+08 | 3,59E+08 | 33559000 | 14240    | 4,98E+08 | 8,76E+08 | 2,59E+08 | 1914200  |
| 0        | 22733000 | 25546000 | 16728    | 19658    | 31133000 | 41316000 | 29162000 | 229830   |
| 831260   | 10998000 | 2704600  | 1052500  | 0        | 23233000 | 16291000 | 17599000 | 5953100  |
| 32887    | 11261000 | 14385000 | 31679000 | 46276000 | 30816000 | 12062000 | 21324000 | 10422000 |
| 17654000 | 34429000 | 9474100  | 6613300  | 4293100  | 27189    | 5624200  | 2548800  | 4417600  |
| 3127200  | 10215000 | 6946400  | 1788900  | 3031000  | 21819000 | 14093000 | 21828000 | 9978000  |

Student's T Student's T Student's T Student's T Majority p Fasta headers

|          |          |          |          |                                                   |
|----------|----------|----------|----------|---------------------------------------------------|
| 0,034293 | 0,022694 | 7,316549 | 2,777731 | tr B4DRU6 B4DRU6 B4DRU6_HUMAN cDNA FLJ5465        |
| 0,050732 | 0,037134 | 4,254315 | 2,413468 | sp P08779 P08779 K1C16_HUMAN Keratin, type I c    |
| 0,061664 | 0,047726 | 4,330429 | 2,273466 | CON__P13;sp P13647 K2C5_HUMAN Keratin, type II c  |
| 0,01885  | 0,01561  | 2,039369 | 2,928409 | tr A0A1U9 tr A0A1U9X8Y4 A0A1U9X8Y4_HUMAN Chlc     |
| 0,012447 | 0,016    | -1,27935 | -2,93821 | tr E9PFW2 tr E9PFW2 E9PFW2_HUMAN Beta-mannosi     |
| 0,003473 | 0,015077 | -0,73153 | -3,03878 | sp O00468 sp O00468-6 AGRIN_HUMAN Isoform 6 of A  |
| 0,007343 | 0,033818 | 0,550653 | 2,430953 | tr Q6FI18 tr Q6FI18 Q6FI18_HUMAN CYR61 protein C  |
| 0,005679 | 0,013217 | -1,70491 | -3,6418  | sp O60245 sp O60245-2 PCDH7_HUMAN Isoform B of    |
| 0,000456 | 0,022667 | -1,78568 | -5,58742 | sp O75326 sp O75326 SEM7A_HUMAN Semaphorin-7A     |
| 0,021682 | 0,016333 | 4,551895 | 3,06938  | sp O75635 sp O75635-2 SPB7_HUMAN Isoform 2 of Se  |
| 0,00128  | 0,0255   | -4,28619 | -5,64933 | tr B8ZX62 tr B8ZX62 B8ZX62_HUMAN Plasminogen ac   |
| 0,001779 | 0,018462 | -2,55714 | -4,89241 | tr V9HWA9 tr V9HWA9 V9HWA9_HUMAN C3-beta-c O      |
| 0,003941 | 0,02328  | 0,615016 | 2,772365 | tr A0A0K0 tr A0A0K0K1J1 A0A0K0K1J1_HUMAN Epidic   |
| 0,001028 | 0,010857 | -0,70534 | -3,46927 | tr A0A0S2 tr A0A0S2Z3D5 A0A0S2Z3D5_HUMAN Apol     |
| 0,01221  | 0,015294 | 1,74356  | 3,142239 | tr Q5TZP0 tr Q5TZP0 Q5TZP0_HUMAN Matrix metallo   |
| 0,008388 | 0,011692 | -2,19498 | -3,53422 | tr B2R7Y0 tr B2R7Y0 B2R7Y0_HUMAN cDNA, FLJ9365    |
| 0,01042  | 0,015892 | 1,285225 | 3,04511  | tr A0A5F9 tr A0A5F9ZHM4 A0A5F9ZHM4_HUMAN L-la     |
| 0,003655 | 0,012667 | 1,174918 | 3,574166 | sp P07339 sp P07339 CATD_HUMAN Cathepsin D OS=    |
| 0,000316 | 0,015    | -0,93058 | -4,5211  | tr Q53H39 tr Q53H39 Q53H39_HUMAN Activin beta-A   |
| 0,011353 | 0,026769 | 0,924987 | 2,745744 | tr V9HWE0 tr V9HWE0 V9HWE0_HUMAN Annexin OS=      |
| 0,006294 | 0,014105 | -3,00684 | -3,92786 | sp P09341 sp P09341 GROA_HUMAN Growth-regulate    |
| 0,006137 | 0,01216  | -1,59661 | -3,53822 | tr F8WCZ6 tr F8WCZ6 F8WCZ6_HUMAN Complement C     |
| 0,024739 | 0,024314 | -2,11675 | -2,75918 | tr A0A087 tr A0A087X0S5 A0A087X0S5_HUMAN Colla    |
| 0,016944 | 0,015474 | 2,237365 | 3,04046  | tr V9HWJ7 tr V9HWJ7 V9HWJ7_HUMAN Epididymis se    |
| 0,026007 | 0,027245 | -2,17389 | -2,73478 | sp P14543 sp P14543-2 NID1_HUMAN Isoform 2 of Ni  |
| 0,001158 | 0,0204   | -3,34537 | -5,54856 | sp P14618 sp P14618 KPYM_HUMAN Pyruvate kinase    |
| 0,026253 | 0,026741 | 2,136597 | 2,722433 | tr B4DMM8 tr B4DMM8 B4DMM8_HUMAN cDNA FLJ57       |
| 0,019047 | 0,021778 | -1,62695 | -2,81901 | tr A0A024 tr A0A024R8V7 A0A024R8V7_HUMAN Met      |
| 0,007728 | 0,016    | 0,86482  | 2,871235 | sp P16144 sp P16144-5 ITB4_HUMAN Isoform Beta-4E  |
| 0,010336 | 0,0168   | 1,328457 | 3,073596 | tr Q60FE6 tr Q60FE6 Q60FE6_HUMAN Filamin A OS=H   |
| 0,001936 | 0,016    | -1,96337 | -4,55844 | tr E9PPJ5 tr E9PPJ5 E9PPJ5_HUMAN Midkine (Fragme  |
| 0,000275 | 0,022667 | -3,94665 | -7,36183 | sp P25391 sp P25391 LAMA1_HUMAN Laminin subuni    |
| 0,008275 | 0,014476 | 2,698631 | 3,654264 | sp P27930 sp P27930 IL1R2_HUMAN Interleukin-1 rec |
| 0,006211 | 0,013818 | 1,86415  | 3,646028 | tr Q5U0A0 tr Q5U0A0 Q5U0A0_HUMAN Proteasome s     |
| 0,016082 | 0,032369 | 0,795854 | 2,463424 | tr V9HWD9 tr V9HWD9 V9HWD9_HUMAN Epididymis I     |
| 0,00715  | 0,016372 | -0,84859 | -2,88922 | sp P31947 sp P31947 1433S_HUMAN 14-3-3 protein s  |
| 0,016995 | 0,022043 | -1,3724  | -2,79881 | sp P32004 sp P32004-3 L1CAM_HUMAN Isoform 3 of I  |
| 0,037222 | 0,026316 | 6,485979 | 2,700111 | sp P35408 sp P35408 PE2R4_HUMAN Prostaglandin E   |
| 0,000215 | 0        | -4,66361 | -7,91369 | tr Q8NE89 tr Q8NE89 Q8NE89_HUMAN Similar to tiss  |
| 0,001445 | 0,018545 | 3,814066 | 5,433379 | sp P53634 sp P53634 CATC_HUMAN Dipeptidyl peptid  |
| 0,004109 | 0,0134   | 1,725639 | 3,876007 | sp P55145 sp P55145 MANF_HUMAN Mesencephalic a    |
| 0,001546 | 0,017143 | -1,72434 | -4,58269 | sp P61769 sp P61769 B2MG_HUMAN Beta-2-microglo    |
| 0,00504  | 0,030159 | -0,52899 | -2,50669 | tr D0PNI1 tr D0PNI1 D0PNI1_HUMAN Epididymis lumi  |
| 0,007747 | 0,031593 | -0,63377 | -2,56031 | sp P78324 sp P78324-2 SHPS1_HUMAN Isoform 2 of T  |
| 0,046381 | 0,031313 | -4,05242 | -2,47211 | tr E9PKG6 tr E9PKG6 E9PKG6_HUMAN Nucleobindin-2   |
| 0,031674 | 0,031148 | 1,763947 | 2,531562 | tr Q5T0R7 tr Q5T0R7 Q5T0R7_HUMAN Adenylyl cyclas  |
| 0,029477 | 0,023167 | -3,58191 | -2,78364 | tr Q7RTW3 tr Q7RTW3 Q7RTW3_HUMAN Neuregulin 1     |
| 0,019577 | 0,027273 | -1,34618 | -2,70457 | sp Q02818 sp Q02818 NUCB1_HUMAN Nucleobindin-1    |
| 0,000444 | 0,017    | -2,6782  | -6,26647 | tr A0A0S2 tr A0A0S2Z3Y1 A0A0S2Z3Y1_HUMAN Galec    |



|          |          |          |          |                                                    |
|----------|----------|----------|----------|----------------------------------------------------|
| 0,001357 | 0,011259 | -0,7732  | -3,50888 | sp Q12841 sp Q12841 FSTL1_HUMAN Follistatin-relate |
| 0,016736 | 0,014133 | 4,07128  | 3,24855  | sp Q12860 sp Q12860-2 CNTN1_HUMAN Isoform 2 of     |
| 0,030712 | 0,044889 | -0,99197 | -2,29305 | tr G3V511 tr G3V511 G3V511_HUMAN Latent-transfo    |
| 0,018473 | 0,031067 | 0,975089 | 2,541871 | tr A0A0S2 tr A0A0S2Z4Q2 A0A0S2Z4Q2_HUMAN Tran      |
| 0,0002   | 0,019429 | -1,4662  | -5,82935 | sp Q16769 sp Q16769 QPCT_HUMAN Glutaminyl-pept     |
| 0,046254 | 0,039072 | -2,47044 | -2,38103 | sp Q6H3X3 sp Q6H3X3 ULBP5_HUMAN UL-16 binding p    |
| 0,028757 | 0,022522 | -3,86984 | -2,81843 | sp Q6UVK1 sp Q6UVK1 CSPG4_HUMAN Chondroitin sul    |
| 0,034609 | 0,037353 | 1,429087 | 2,396592 | sp Q6YHK3 sp Q6YHK3-4 CD109_HUMAN Isoform 4 of     |
| 0,037786 | 0,047081 | -1,18718 | -2,26868 | tr B3KRK1 tr B3KRK1 B3KRK1_HUMAN cDNA FLJ34442     |
| 0,014619 | 0,01325  | -2,77002 | -3,23162 | sp Q8IUX7 sp Q8IUX7 AEBP1_HUMAN Adipocyte enha     |
| 0,01626  | 0,027034 | -1,10207 | -2,68928 | sp Q92743 sp Q92743 HTRA1_HUMAN Serine protease    |
| 0,025166 | 0,026786 | -1,8677  | -2,70089 | sp Q92823 sp Q92823-5 NRCAM_HUMAN Isoform 5 of     |
| 0,028217 | 0,030645 | -1,39815 | -2,50812 | sp Q99985 sp Q99985 SEM3C_HUMAN Semaphorin-3C      |
| 0,011454 | 0,014303 | 1,794139 | 3,200996 | tr A0A140 tr A0A140VJY7 A0A140VJY7_HUMAN Thior     |
| 0,003589 | 0,014889 | -1,71137 | -3,96387 | sp Q9BRK5 sp Q9BRK5-4 CAB45_HUMAN Isoform 4 of     |
| 0,00934  | 0,013677 | 1,524933 | 3,232225 | tr Q4ZG85 tr Q4ZG85 Q4ZG85_HUMAN Uncharacteriz     |
| 0,001953 | 0,012276 | -0,73395 | -3,27842 | sp Q9UBP4 sp Q9UBP4 DKK3_HUMAN Dickkopf-relatec    |
| 0,018767 | 0,015238 | 2,015296 | 2,926387 | tr B7Z5J4 tr B7Z5J4 B7Z5J4_HUMAN Carboxypeptidas   |
| 0,035723 | 0,042479 | -1,2619  | -2,32651 | tr W8GRM7 tr W8GRM7 W8GRM7_HUMAN Kallikrein 1      |
| 0,057767 | 0,040057 | -6,20886 | -2,3592  | tr D7RVA3 tr D7RVA3 D7RVA3_HUMAN Granulocyte c     |
| 0,001054 | 0,0136   | -5,69111 | -6,06688 | tr A0A1V1 tr A0A1V1IFQ2 A0A1V1IFQ2_HUMAN MHC       |
| 0,001788 | 0,017    | -4,35788 | -5,3072  | tr A0A288 tr A0A288Q9P9 A0A288Q9P9_HUMAN MH        |
| 0,000287 | 0        | -6,31009 | -7,85561 | tr F5H2D0 tr F5H2D0 F5H2D0_HUMAN Complement s      |
| 0,001113 | 0,022667 | 4,862326 | 5,896164 | tr C9JB55 tr C9JB55 C9JB55_HUMAN Serotransferrin   |
| 0,002192 | 0,015765 | -1,27358 | -3,97254 | tr Q5M8T4 tr Q5M8T4 Q5M8T4_HUMAN Connective ti     |

7, highly similar to Keratin, type II cytoskeletal 6A OS=Homo sapiens OX=9606 PE=2 SV=1;sp|P02538

ytoskeletal 5 OS=Homo sapiens OX=9606 GN=KRT5 PE=1 SV=3;tr|B4E1T1|B4E1T1\_HUMAN cDNA FLU  
ide intracellular channel protein OS=Homo sapiens OX=9606 PE=3 SV=1;tr|Q5SRT3|Q5SRT3\_HUMA  
dase OS=Homo sapiens OX=9606 GN=MANBA PE=1 SV=1;tr|B4DT18|B4DT18\_HUMAN Beta-mannos  
Agrin OS=Homo sapiens OX=9606 GN=AGRN;sp|O00468-7|AGRIN\_HUMAN Isoform 7 of Agrin OS=Hc  
OS=Homo sapiens OX=9606 GN=CYR61 PE=1 SV=1;sp|O00622|CCN1\_HUMAN CCN family member 1 (C  
Protocadherin-7 OS=Homo sapiens OX=9606 GN=PCDH7;sp|O60245|PCDH7\_HUMAN Protocadherin  
A OS=Homo sapiens OX=9606 GN=SEMA7A PE=1 SV=1;sp|O75326-2|SEM7A\_HUMAN Isoform 2 of Se  
erpin B7 OS=Homo sapiens OX=9606 GN=SERPINB7;sp|O75635|SPB7\_HUMAN Serpin B7 OS=Homo s  
t activator OS=Homo sapiens OX=9606 GN=PLAT PE=2 SV=1;sp|P00750|TPA\_HUMAN Tissue-type plasr  
5 OS=Homo sapiens OX=9606 GN=HEL-S-62p PE=2 SV=1;sp|P01024|CO3\_HUMAN Complement C3 OS=H  
dymis secretory protein Li 2 OS=Homo sapiens OX=9606 GN=HEL-S-2 PE=2 SV=1;sp|P01034|CYTC\_HI  
ipoprotein E isoform 1 (Fragment) OS=Homo sapiens OX=9606 GN=APOE PE=2 SV=1;sp|P02649|APC  
proteinase 1 (Interstitial collagenase) OS=Homo sapiens OX=9606 PE=2 SV=1;tr|Q53G96|Q53G96\_H  
4, highly similar to Homo sapiens serpin peptidase inhibitor, clade B (ovalbumin), member 2 (SERPIN  
actate dehydrogenase OS=Homo sapiens OX=9606 GN=LDHB PE=1 SV=1;sp|P07195|LDHB\_HUMAN L  
Homo sapiens OX=9606 GN=CTSD PE=1 SV=1;tr|V9HWI3|V9HWI3\_HUMAN Cathepsin D OS=Homo si  
chain (Fragment) OS=Homo sapiens OX=9606 PE=2 SV=1;tr|A4D1W7|A4D1W7\_HUMAN Activin bet  
Homo sapiens OX=9606 GN=HEL-S-7 PE=2 SV=1;sp|P08758|ANXA5\_HUMAN Annexin A5 OS=Homo s

C1s subcomponent OS=Homo sapiens OX=9606 GN=C1S PE=1 SV=1;tr|A0A087X232|A0A087X232\_H  
gen alpha-1(VI) chain OS=Homo sapiens OX=9606 GN=COL6A1 PE=1 SV=1;tr|A0A384P5H7|A0A384P  
cretory protein Li 37 OS=Homo sapiens OX=9606 GN=HEL-S-37 PE=2 SV=1;tr|Q53FI1|Q53FI1\_HUMA  
dogen-1 OS=Homo sapiens OX=9606 GN=NID1;sp|P14543|NID1\_HUMAN Nidogen-1 OS=Homo sapie  
PKM OS=Homo sapiens OX=9606 GN=PKM PE=1 SV=4;tr|V9HWP8|V9HWP8\_HUMAN Pyruvate kina  
'328, highly similar to Beta-1,4-galactosyltransferase 1 OS=Homo sapiens OX=9606 PE=2 SV=1;tr|B7Z  
alloproteinase inhibitor 2 OS=Homo sapiens OX=9606 GN=TIMP2 PE=3 SV=1;tr|A0A140VK57|A0A14  
of Integrin beta-4 OS=Homo sapiens OX=9606 GN=ITGB4;tr|Q59H46|Q59H46\_HUMAN Integrin bet  
lomo sapiens OX=9606 GN=FLNA PE=2 SV=1;sp|P21333|FLNA\_HUMAN Filamin-A OS=Homo sapiens  
ent) OS=Homo sapiens OX=9606 GN=MDK PE=1 SV=1;sp|P21741|MK\_HUMAN Midkine OS=Homo sa

eptor type 2 OS=Homo sapiens OX=9606 GN=IL1R2 PE=1 SV=1;sp|P27930-2|IL1R2\_HUMAN Isoform  
ubunit alpha type OS=Homo sapiens OX=9606 PE=2 SV=1;tr|A0A109NGN6|A0A109NGN6\_HUMAN F  
uminal protein 107 OS=Homo sapiens OX=9606 GN=HEL107 PE=2 SV=1;tr|Q53EM5|Q53EM5\_HUMA  
igma OS=Homo sapiens OX=9606 GN=SFN PE=1 SV=1;sp|P31947-2|1433S\_HUMAN Isoform 2 of 14-3  
Neural cell adhesion molecule L1 OS=Homo sapiens OX=9606 GN=L1CAM;sp|P32004-2|L1CAM\_HUN

re factor pathway inhibitor 2 (Fragment) OS=Homo sapiens OX=9606 PE=2 SV=1;sp|P48307-2|TFPI2\_  
lase 1 OS=Homo sapiens OX=9606 GN=CTSC PE=1 SV=2;tr|B4DJQ8|B4DJQ8\_HUMAN Cathepsin C OS  
astrocyte-derived neurotrophic factor OS=Homo sapiens OX=9606 GN=MANF PE=1 SV=3;tr|A8K878|  
bulin OS=Homo sapiens OX=9606 GN=B2M PE=1 SV=1;tr|B4E0X1|B4E0X1\_HUMAN Beta-2-microglob  
inal protein 4 OS=Homo sapiens OX=9606 GN=YWHAZ PE=2 SV=1;sp|P63104|1433Z\_HUMAN 14-3-3  
tyrosine-protein phosphatase non-receptor type substrate 1 OS=Homo sapiens OX=9606 GN=SIRPA;s  
2 OS=Homo sapiens OX=9606 GN=NUCB2 PE=1 SV=2;sp|P80303-2|NUCB2\_HUMAN Isoform 2 of Nuc  
se-associated protein 1 (Fragment) OS=Homo sapiens OX=9606 GN=CAP1 PE=1 SV=1;tr|Q5T0R6|Q5T  
isoform HRG-beta2 OS=Homo sapiens OX=9606 GN=NRG1 PE=2 SV=1;tr|B0FYA7|B0FYA7\_HUMAN I  
L OS=Homo sapiens OX=9606 GN=NUCB1 PE=1 SV=4;tr|A8K7Q1|A8K7Q1\_HUMAN Nucleobindin-1 O  
stin-3-binding protein (Fragment) OS=Homo sapiens OX=9606 GN=LGALS3BP PE=2 SV=1;sp|Q08380|

d protein 1 OS=Homo sapiens OX=9606 GN=FSTL1 PE=1 SV=1;sp|Q12841-2|FSTL1\_HUMAN Isoform  
 Contactin-1 OS=Homo sapiens OX=9606 GN=CNTN1;tr|A0A024R104|A0A024R104\_HUMAN Contacti  
 rming growth factor beta-binding protein 2 OS=Homo sapiens OX=9606 GN=LTBP2 PE=1 SV=1;tr|G3V  
 isforming growth factor-beta-induced protein ig-h3 (Fragment) OS=Homo sapiens OX=9606 GN=TGFB  
 ide cyclotransferase OS=Homo sapiens OX=9606 GN=QPCT PE=1 SV=1;sp|Q16769-2|QPCT\_HUMAN  
 protein 5 OS=Homo sapiens OX=9606 GN=RAET1G PE=1 SV=1;sp|Q6H3X3-2|ULBP5\_HUMAN Isoform

CD109 antigen OS=Homo sapiens OX=9606 GN=CD109;sp|Q6YHK3|CD109\_HUMAN CD109 antigen C  
 ! fis, clone HLUNG2001507, highly similar to Amphoterin-induced protein 2 OS=Homo sapiens OX=96  
 ncer-binding protein 1 OS=Homo sapiens OX=9606 GN=AEBP1 PE=1 SV=1;tr|B4DJB3|B4DJB3\_HUMA  
 e HTRA1 OS=Homo sapiens OX=9606 GN=HTRA1 PE=1 SV=1;tr|Q05DJ8|Q05DJ8\_HUMAN HTRA1 prot  
 i Neuronal cell adhesion molecule OS=Homo sapiens OX=9606 GN=NRCAM;sp|Q92823-3|NRCAM\_HI  
 3 OS=Homo sapiens OX=9606 GN=SEMA3C PE=2 SV=2;tr|B4E2I9|B4E2I9\_HUMAN Semaphorin-3C OS  
 edoxin domain-containing protein 17 OS=Homo sapiens OX=9606 PE=2 SV=1;sp|Q9BRA2|TXD17\_HU  
 45 kDa calcium-binding protein OS=Homo sapiens OX=9606 GN=SDF4;tr|G3V1E2|G3V1E2\_HUMAN 4  
 ed protein CRIM1 (Fragment) OS=Homo sapiens OX=9606 GN=CRIM1 PE=4 SV=1;sp|Q9NZV1|CRIM1  
 l protein 3 OS=Homo sapiens OX=9606 GN=DKK3 PE=1 SV=2;tr|F6SYF8|F6SYF8\_HUMAN Dickkopf-re  
 se A4 OS=Homo sapiens OX=9606 GN=CPA4 PE=1 SV=1;sp|Q9UI42-2|CBPA4\_HUMAN Isoform 2 of C  
 0 protein 9 (Fragment) OS=Homo sapiens OX=9606 GN=KLK10 PE=2 SV=1;tr|A0A024R4N7|A0A024R  
 olony-stimulating factor (Fragment) OS=Homo sapiens OX=9606 GN=CSF3 PE=2 SV=1;tr|A0A0B4U5E  
 class I antigen OS=Homo sapiens OX=9606 GN=HLA-C PE=3 SV=1;tr|A0A0S4T3H1|A0A0S4T3H1\_HUI

ubcomponent C1r OS=Homo sapiens OX=9606 GN=C1R PE=1 SV=3;tr|Q53HU9|Q53HU9\_HUMAN Cc

issue growth factor OS=Homo sapiens OX=9606 GN=CTGF PE=2 SV=1;tr|B3KRV6|B3KRV6\_HUMAN cl

;|K2C6A\_HUMAN Keratin, type II cytoskeletal 6A OS=Homo sapiens OX=9606 GN=KRT6A PE=1 SV=3;|

I54081, highly similar to Keratin, type II cytoskeletal 5 OS=Homo sapiens OX=9606 PE=2 SV=1;tr|B4D

AN Chloride intracellular channel protein OS=Homo sapiens OX=9606 GN=CLIC1 PE=2 SV=2;tr|Q53FB

idase OS=Homo sapiens OX=9606 PE=2 SV=1;tr|A8K6D3|A8K6D3\_HUMAN Beta-mannosidase OS=H

omo sapiens OX=9606 GN=AGRN;sp|O00468-3|AGRIN\_HUMAN Isoform 3 of Agrin OS=Homo sapiens

OS=Homo sapiens OX=9606 GN=CCN1 PE=1 SV=1;tr|B4DI61|B4DI61\_HUMAN cDNA FLJ58182, highly

semaphorin-7A OS=Homo sapiens OX=9606 GN=SEMA7A;tr|F5GYX3|F5GYX3\_HUMAN Semaphorin-7A

sapiens OX=9606 GN=SERPINB7 PE=1 SV=1;tr|A8K3Q8|A8K3Q8\_HUMAN cDNA FLJ75069, highly simil

inogen activator OS=Homo sapiens OX=9606 GN=PLAT PE=1 SV=1;tr|B4DNJ1|B4DNJ1\_HUMAN T-pl

omo sapiens OX=9606 GN=C3 PE=1 SV=2;tr|B4E216|B4E216\_HUMAN C3-beta-c OS=Homo sapiens

DE\_HUMAN Apolipoprotein E OS=Homo sapiens OX=9606 GN=APOE PE=1 SV=1;tr|A0A346DBY2|A0A

UMAN Matrix metalloproteinase 1 preproprotein variant (Fragment) OS=Homo sapiens OX=9606 PE

32), mRNA OS=Homo sapiens OX=9606 PE=2 SV=1;sp|P05120|PAI2\_HUMAN Plasminogen activator i

-lactate dehydrogenase B chain OS=Homo sapiens OX=9606 GN=LDHB PE=1 SV=2;tr|Q5U077|Q5U0

sapiens OX=9606 GN=HEL-S-130P PE=2 SV=1;tr|A0A1B0GWE8|A0A1B0GWE8\_HUMAN Cathepsin D O

a-A chain OS=Homo sapiens OX=9606 GN=INHBA PE=2 SV=1;sp|P08476|INHBA\_HUMAN Inhibin bet

sapiens OX=9606 GN=ANXA5 PE=1 SV=2;tr|E9PHT9|E9PHT9\_HUMAN Annexin OS=Homo sapiens OX=

UMAN Complement C1s subcomponent OS=Homo sapiens OX=9606 GN=C1S PE=1 SV=1;tr|B3KNX0|

5H7\_HUMAN Collagen, type VI, alpha 1, isoform CRA\_b OS=Homo sapiens OX=9606 GN=COL6A1 PE=

AN L-plastin variant (Fragment) OS=Homo sapiens OX=9606 PE=2 SV=1;tr|A0A024RDT4|A0A024RDT4

ns OX=9606 GN=NID1 PE=1 SV=3;tr|A0A384MR25|A0A384MR25\_HUMAN Epididymis secretory spe

se OS=Homo sapiens OX=9606 GN=HEL-S-30 PE=2 SV=1;sp|P14618-2|KPYM\_HUMAN Isoform M1 of

AH9|B7ZAH9\_HUMAN cDNA, FLJ79193, highly similar to Beta-1,4-galactosyltransferase 1 OS=Homo

OVK57\_HUMAN Metalloproteinase inhibitor 2 OS=Homo sapiens OX=9606 PE=2 SV=1;sp|P16035|TII

a (Fragment) OS=Homo sapiens OX=9606 PE=2 SV=1;sp|P16144-4|ITB4\_HUMAN Isoform Beta-4D of

OX=9606 GN=FLNA PE=1 SV=4;sp|P21333-2|FLNA\_HUMAN Isoform 2 of Filamin-A OS=Homo sapien

sapiens OX=9606 GN=MDK PE=1 SV=1;tr|E9PLM6|E9PLM6\_HUMAN Midkine OS=Homo sapiens OX=96

roteasome subunit alpha type OS=Homo sapiens OX=9606 PE=2 SV=1;sp|P28066|PSA5\_HUMAN Pro

AN Transketolase variant (Fragment) OS=Homo sapiens OX=9606 PE=2 SV=1;sp|P29401|TKT\_HUMAN

AN Isoform 2 of Neural cell adhesion molecule L1 OS=Homo sapiens OX=9606 GN=L1CAM;tr|Q7Z3Z

\_HUMAN Isoform 2 of Tissue factor pathway inhibitor 2 OS=Homo sapiens OX=9606 GN=TFPI2;sp|P4

A8K878\_HUMAN cDNA FLJ77177, highly similar to Homo sapiens arginine-rich, mutated in early stag

bulin OS=Homo sapiens OX=9606 PE=2 SV=1;tr|A6XMH4|A6XMH4\_HUMAN Beta-2-microglobulin OS

protein zeta/delta OS=Homo sapiens OX=9606 GN=YWHAZ PE=1 SV=1;tr|E7EX29|E7EX29\_HUMAN

p|P78324|SHPS1\_HUMAN Tyrosine-protein phosphatase non-receptor type substrate 1 OS=Homo s

leobindin-2 OS=Homo sapiens OX=9606 GN=NUCB2;sp|P80303|NUCB2\_HUMAN Nucleobindin-2 OS

OR6\_HUMAN Adenylyl cyclase-associated protein 1 (Fragment) OS=Homo sapiens OX=9606 GN=CAF

Heregulin-gamma protein isoform 1 (Fragment) OS=Homo sapiens OX=9606 GN=NRG1 PE=2 SV=1;sp

S=Homo sapiens OX=9606 PE=2 SV=1;tr|Q53GX6|Q53GX6\_HUMAN Nucleobindin-1 (Fragment) OS=I

LG3BP\_HUMAN Galectin-3-binding protein OS=Homo sapiens OX=9606 GN=LGALS3BP PE=1 SV=1;tr|

2 of Follistatin-related protein 1 OS=Homo sapiens OX=9606 GN=FSTL1;tr|B4DTZ8|B4DTZ8\_HUMAN  
in 1, isoform CRA\_a OS=Homo sapiens OX=9606 GN=CNTN1 PE=3 SV=1;sp|Q12860|CNTN1\_HUMAN  
/3X5|G3V3X5\_HUMAN Latent-transforming growth factor beta-binding protein 2 OS=Homo sapiens  
3I PE=2 SV=1;sp|Q15582|BGH3\_HUMAN Transforming growth factor-beta-induced protein ig-h3 OS=  
Isoform 2 of Glutaminyl-peptide cyclotransferase OS=Homo sapiens OX=9606 GN=QPCT;tr|B5MCZ9|  
2 of UL-16 binding protein 5 OS=Homo sapiens OX=9606 GN=RAET1G;sp|Q5VY80|ULBP6\_HUMAN

OS=Homo sapiens OX=9606 GN=CD109 PE=1 SV=2;sp|Q6YHK3-2|CD109\_HUMAN Isoform 2 of CD109  
06 PE=2 SV=1;tr|A0A024R127|A0A024R127\_HUMAN Adhesion molecule with Ig-like domain 2, isofo  
N cDNA FLJ55979, highly similar to Homo sapiens AE binding protein 1 (AEBP1), mRNA OS=Homo sap  
tein (Fragment) OS=Homo sapiens OX=9606 GN=HTRA1 PE=2 SV=1;tr|B3KRN4|B3KRN4\_HUMAN cDN  
UMAN Isoform 3 of Neuronal cell adhesion molecule OS=Homo sapiens OX=9606 GN=NRCAM;sp|Q9

IMAN Thioredoxin domain-containing protein 17 OS=Homo sapiens OX=9606 GN=TXNDC17 PE=1 SV=  
15 kDa calcium-binding protein OS=Homo sapiens OX=9606 GN=SDF4 PE=1 SV=1;sp|Q9BRK5-3|CAB4  
\_HUMAN Cysteine-rich motor neuron 1 protein OS=Homo sapiens OX=9606 GN=CRIM1 PE=1 SV=1  
lated protein 3 OS=Homo sapiens OX=9606 GN=DKK3 PE=1 SV=1;tr|O43532|O43532\_HUMAN RIG-li  
arboxypeptidase A4 OS=Homo sapiens OX=9606 GN=CPA4;tr|A4D1M3|A4D1M3\_HUMAN Carboxype  
4N7\_HUMAN Kallikrein 10, isoform CRA\_a OS=Homo sapiens OX=9606 GN=KLK10 PE=4 SV=1;tr|W8C  
3|A0A0B4U5E3\_HUMAN Granulocyte colony-stimulating factor (Fragment) OS=Homo sapiens OX=96  
MAN MHC class I antigen OS=Homo sapiens OX=9606 GN=HLA-C PE=3 SV=1;tr|A0A5H2UZM2|A0A5H

plement subcomponent C1r (Fragment) OS=Homo sapiens OX=9606 PE=2 SV=1;tr|Q53HT9|Q53H

DNA FLJ34961 fis, clone NTONG2003839, highly similar to CONNECTIVE TISSUE GROWTH FACTOR OS=

=9606 GN=ANXA5 PE=1 SV=1;tr|B4DNG6|B4DNG6\_HUMAN Annexin



| LFQ intens |
|------------|------------|------------|------------|------------|------------|------------|------------|------------|
| 1          | 1          | 1          | 2          | 2          | 2          | 2          | 3          | 3          |
| 29,78377   | 31,4543    | 31,45292   | 30,42302   | 31,36656   | 30,96987   | 31,01065   | 30,13394   | 29,97937   |
| 31,83876   | 32,27556   | 33,19985   | 30,84416   | 30,55536   | 31,14108   | 31,12127   | 28,38928   | 27,05992   |
| 31,03118   | 32,02697   | 32,30549   | 28,31095   | 28,08035   | 29,06669   | 28,91336   | 20,79574   | 24,09746   |
| 24,49698   | 28,37501   | 30,17415   | 21,70664   | 24,67246   | 22,18999   | 22,98011   | 22,38854   | 22,66983   |
| 25,30247   | 23,26814   | 30,43599   | 25,17741   | 22,8621    | 24,30911   | 24,60071   | 22,0442    | 20,70717   |
| 33,83921   | 33,80713   | 34,3397    | 31,56883   | 31,73376   | 32,68712   | 32,62625   | 29,26591   | 27,52992   |
| 24,74222   | 24,60337   | 30,64418   | 25,10153   | 25,00449   | 21,73413   | 23,56802   | 21,70214   | 22,83614   |
| 28,93188   | 30,30051   | 31,04999   | 27,05144   | 26,39643   | 28,41143   | 27,3339    | 23,9612    | 24,71225   |
| 22,99402   | 22,92194   | 23,06814   | 24,61234   | 24,17456   | 23,74875   | 29,0791    | 27,32199   | 28,00646   |
| 21,99236   | 23,77998   | 23,67256   | 20,3393    | 20,89156   | 21,14923   | 20,90991   | 20,98905   | 21,36959   |
| 30,68529   | 30,28703   | 30,85964   | 30,81879   | 30,90928   | 30,77941   | 30,85823   | 30,37399   | 30,38577   |
| 22,19592   | 22,21376   | 21,9892    | 22,62654   | 23,66371   | 22,6054    | 22,51538   | 23,07883   | 23,2337    |
| 33,43204   | 33,12132   | 33,52426   | 34,14444   | 34,1734    | 33,66034   | 33,77686   | 34,1496    | 34,19638   |
| 24,80228   | 24,53925   | 22,37404   | 22,42995   | 25,92134   | 25,04222   | 24,20963   | 24,18624   | 20,9857    |
| 33,44233   | 33,07312   | 33,15658   | 32,61617   | 32,74256   | 33,55408   | 33,48424   | 32,51371   | 32,86356   |
| 23,0782    | 24,21573   | 24,30058   | 23,73355   | 23,35205   | 23,34027   | 24,0616    | 23,02624   | 23,14763   |
| 22,09261   | 23,93129   | 25,10321   | 24,61857   | 23,12668   | 22,78339   | 22,55286   | 22,82993   | 22,60608   |
| 33,00556   | 32,62901   | 32,61581   | 32,94073   | 32,86133   | 32,7856    | 33,02602   | 33,07253   | 33,08569   |
| 25,96016   | 26,23316   | 28,2069    | 28,04411   | 27,45591   | 27,88495   | 27,38714   | 26,86667   | 26,94492   |
| 28,59754   | 29,47365   | 29,71357   | 28,63596   | 28,62502   | 29,0331    | 28,81403   | 28,41393   | 28,11629   |
| 24,54144   | 24,05358   | 24,24405   | 26,21647   | 26,88285   | 23,95601   | 23,44199   | 25,95476   | 26,61077   |
| 31,73759   | 30,27275   | 29,1043    | 30,81215   | 30,58262   | 30,93818   | 30,58414   | 32,10942   | 31,34757   |
| 26,97235   | 27,53875   | 23,70641   | 22,08734   | 23,46811   | 22,2817    | 22,63029   | 27,70695   | 27,51427   |
| 22,93884   | 22,8041    | 29,19943   | 28,65775   | 22,67563   | 28,79383   | 29,29743   | 22,48849   | 23,56157   |
| 27,09295   | 26,39926   | 26,58606   | 28,29824   | 28,05274   | 26,49989   | 26,80193   | 28,56384   | 28,69026   |
| 28,13104   | 28,25503   | 28,74641   | 28,37977   | 28,43305   | 28,94693   | 28,85878   | 27,75085   | 27,60159   |
| 28,65492   | 30,31646   | 29,05628   | 27,62944   | 27,36328   | 25,98713   | 27,53282   | 24,71282   | 25,02129   |
| 24,86585   | 25,66858   | 26,89342   | 24,55467   | 24,4985    | 24,65529   | 21,50152   | 24,3995    | 26,34206   |
| 28,38961   | 29,04604   | 27,39198   | 27,05734   | 28,2615    | 27,86071   | 27,11128   | 28,68201   | 29,20016   |
| 29,42252   | 28,33654   | 28,53126   | 29,20744   | 28,26616   | 28,82299   | 28,99418   | 29,84019   | 30,15798   |
| 32,96418   | 32,67141   | 32,896     | 33,34889   | 33,30157   | 32,60907   | 33,00887   | 33,36307   | 33,28444   |
| 28,45391   | 23,5664    | 23,91694   | 23,14386   | 27,57788   | 21,32798   | 23,06441   | 27,5285    | 28,11277   |
| 26,35839   | 28,33151   | 26,54073   | 25,614     | 26,20596   | 27,04458   | 26,9249    | 21,48138   | 26,02842   |
| 29,36146   | 28,99612   | 29,57028   | 29,23779   | 28,91288   | 28,17327   | 28,51661   | 29,26282   | 28,85243   |
| 30,43559   | 30,01983   | 30,76928   | 30,10749   | 29,93579   | 30,29734   | 30,09572   | 29,60846   | 29,72095   |
| 22,9875    | 22,37928   | 25,87683   | 23,99438   | 24,1868    | 26,35328   | 25,0115    | 21,9154    | 24,04902   |
| 25,27824   | 25,41796   | 23,60397   | 25,33149   | 25,43039   | 26,54541   | 26,21545   | 25,56404   | 25,33248   |
| 22,87401   | 22,50927   | 23,7104    | 24,00533   | 25,3654    | 23,46208   | 26,69856   | 27,58857   | 27,57975   |
| 24,83543   | 25,70187   | 25,88129   | 28,09989   | 27,96157   | 27,57521   | 27,98994   | 28,46045   | 28,40068   |
| 31,3198    | 32,1689    | 30,87943   | 30,74903   | 30,78659   | 30,80301   | 30,76256   | 31,63901   | 31,60342   |
| 30,49037   | 30,49486   | 30,10011   | 30,22458   | 30,02314   | 29,36208   | 29,68611   | 29,85046   | 29,70337   |
| 29,46919   | 29,0311    | 30,18648   | 29,65763   | 29,75707   | 28,64516   | 28,96063   | 28,84972   | 29,1438    |
| 32,04986   | 32,27134   | 32,02815   | 32,79498   | 32,75521   | 31,31802   | 31,96716   | 31,79052   | 32,39749   |
| 22,55595   | 24,25068   | 24,56715   | 23,0456    | 23,46548   | 22,989     | 23,09163   | 22,47135   | 22,52411   |
| 25,95821   | 26,75468   | 26,51845   | 26,03626   | 26,50314   | 25,78497   | 25,75491   | 23,51093   | 25,66473   |
| 27,68646   | 22,77694   | 24,11508   | 27,24998   | 26,84374   | 26,66519   | 26,03526   | 27,90133   | 26,9982    |
| 29,76029   | 28,75646   | 28,52832   | 29,17926   | 28,34744   | 27,79631   | 27,73098   | 27,82171   | 27,83864   |
| 30,69594   | 30,59067   | 30,49295   | 30,91663   | 30,91748   | 30,831     | 30,68361   | 31,33527   | 31,499     |



|          |          |          |          |          |          |          |          |          |
|----------|----------|----------|----------|----------|----------|----------|----------|----------|
| 23,29637 | 25,09152 | 25,01103 | 23,23882 | 23,89069 | 25,0916  | 25,45848 | 23,61908 | 24,25263 |
| 22,49253 | 22,52481 | 25,14794 | 23,05078 | 22,8054  | 21,69381 | 22,78836 | 22,47301 | 22,89599 |
| 39,82963 | 40,3972  | 40,3675  | 39,97216 | 40,09383 | 39,7945  | 39,99011 | 39,55767 | 39,61191 |
| 28,40186 | 29,72688 | 29,72761 | 28,52862 | 29,12443 | 28,77982 | 28,26808 | 27,7348  | 28,20983 |
| 34,12325 | 32,30138 | 33,52869 | 33,55225 | 33,47255 | 32,45425 | 32,37485 | 31,58352 | 31,52687 |
| 30,13883 | 29,47183 | 28,8308  | 29,95934 | 29,9157  | 29,73702 | 29,175   | 29,41877 | 29,20156 |
| 22,62466 | 25,91079 | 25,23092 | 22,80388 | 24,75694 | 24,96521 | 25,17489 | 22,48554 | 23,17973 |
| 25,66971 | 25,48395 | 23,57503 | 26,97126 | 26,78694 | 26,20247 | 26,27021 | 26,45172 | 26,68565 |
| 26,47663 | 27,08861 | 28,3572  | 27,35481 | 27,29658 | 25,45707 | 25,58337 | 26,46857 | 26,36766 |
| 27,38303 | 28,39734 | 32,13302 | 27,33253 | 26,12108 | 25,9608  | 27,51307 | 23,24587 | 21,69751 |
| 25,05519 | 28,31765 | 30,25214 | 28,23571 | 26,87373 | 28,07923 | 27,23425 | 27,06764 | 29,22977 |
| 28,35342 | 27,33415 | 26,39274 | 27,92875 | 27,98555 | 26,77706 | 26,85115 | 27,75793 | 28,13335 |
| 34,81926 | 34,74259 | 34,96942 | 35,25993 | 35,31477 | 34,69872 | 34,8409  | 35,07112 | 34,91665 |
| 26,38739 | 29,42734 | 29,03265 | 28,95795 | 27,89891 | 30,17985 | 28,8887  | 28,28105 | 27,13134 |
| 25,75524 | 24,58153 | 26,69803 | 29,68005 | 28,98682 | 23,46787 | 24,53582 | 27,83545 | 27,79228 |
| 31,47581 | 29,98983 | 30,45582 | 31,25259 | 31,19366 | 29,44123 | 28,88757 | 32,26411 | 32,34884 |
| 23,90181 | 23,45889 | 22,8481  | 23,49253 | 23,7263  | 23,40093 | 23,49521 | 23,95961 | 24,07227 |
| 23,96913 | 23,94351 | 25,28884 | 24,42714 | 23,9736  | 24,42822 | 25,31517 | 24,33688 | 24,59429 |
| 26,46247 | 26,39802 | 26,11337 | 27,12495 | 26,4502  | 26,37867 | 25,8764  | 26,75824 | 27,07745 |
| 27,74175 | 26,71686 | 26,68284 | 27,62485 | 28,0773  | 27,45834 | 28,0267  | 27,94447 | 27,14248 |
| 26,32468 | 28,36611 | 28,62708 | 26,59861 | 26,49697 | 27,7252  | 27,80107 | 26,69432 | 26,16611 |
| 32,49028 | 32,54522 | 32,02716 | 32,55034 | 32,41956 | 33,49118 | 32,99525 | 31,95491 | 31,90081 |
| 30,75422 | 30,03604 | 31,20005 | 30,95088 | 30,94831 | 30,04218 | 29,87449 | 29,93227 | 29,90297 |
| 24,87891 | 25,97367 | 25,76981 | 25,20105 | 24,93405 | 25,19959 | 24,85771 | 23,93373 | 24,59821 |
| 29,45912 | 29,6348  | 29,13973 | 29,22299 | 29,29959 | 29,25986 | 29,29769 | 28,45709 | 28,59715 |
| 23,09327 | 22,72077 | 24,42926 | 29,01081 | 29,04226 | 29,36077 | 29,08563 | 28,76284 | 29,60442 |
| 29,35548 | 22,51285 | 27,11108 | 30,4184  | 29,97528 | 22,12187 | 27,80931 | 31,11166 | 30,12854 |
| 30,29351 | 30,37098 | 30,32034 | 29,59586 | 29,41542 | 29,22338 | 29,18959 | 28,92872 | 28,58043 |
| 30,80209 | 30,56074 | 30,1162  | 30,4565  | 30,12842 | 30,64134 | 30,5539  | 30,16949 | 30,31008 |
| 28,33769 | 28,78279 | 28,03837 | 26,8832  | 27,00131 | 27,44979 | 27,41224 | 27,20602 | 27,0276  |
| 30,47373 | 29,53393 | 29,67622 | 30,88358 | 30,62104 | 30,64581 | 30,31149 | 29,83079 | 30,10974 |
| 31,64736 | 31,49781 | 31,01824 | 31,2683  | 31,09339 | 30,62052 | 31,00618 | 31,18943 | 30,85712 |
| 26,02485 | 22,60765 | 26,55919 | 26,79699 | 23,39697 | 26,79476 | 25,26446 | 22,918   | 27,45403 |
| 30,69917 | 30,19084 | 29,30687 | 30,18459 | 30,73287 | 31,3022  | 31,05705 | 30,66619 | 30,62043 |
| 29,70017 | 31,17516 | 30,40669 | 29,74439 | 29,73148 | 30,72525 | 31,16249 | 29,19221 | 29,52684 |
| 32,1478  | 31,99044 | 31,91071 | 32,20597 | 32,28532 | 32,09276 | 32,07431 | 32,46709 | 32,60202 |
| 36,66924 | 36,67477 | 37,06567 | 36,23622 | 36,39741 | 36,92138 | 36,83975 | 36,54697 | 36,51467 |
| 28,83641 | 27,71673 | 28,26006 | 29,13582 | 28,71823 | 28,22366 | 28,1248  | 27,88332 | 27,59399 |
| 31,38469 | 31,11873 | 31,19578 | 31,53723 | 31,60116 | 31,29576 | 31,11471 | 32,09704 | 32,07728 |
| 29,73119 | 27,79749 | 28,15938 | 27,87701 | 28,09628 | 28,40255 | 28,18778 | 28,98829 | 29,14239 |
| 26,75468 | 27,26141 | 28,06712 | 27,51209 | 27,91102 | 27,01723 | 27,34706 | 27,24164 | 26,99949 |
| 24,06817 | 22,51959 | 22,60184 | 26,4321  | 24,59241 | 23,57057 | 24,31043 | 23,02665 | 24,03884 |
| 28,95074 | 29,18386 | 29,2963  | 28,62383 | 28,84107 | 29,17331 | 29,1775  | 28,1155  | 28,13951 |
| 23,45989 | 24,27916 | 24,54799 | 24,41886 | 21,94694 | 24,67745 | 24,417   | 24,42873 | 24,85529 |
| 25,5526  | 23,09792 | 24,06357 | 27,97301 | 27,77335 | 26,13055 | 25,72093 | 27,91296 | 27,27293 |
| 29,78544 | 27,05631 | 26,84074 | 30,28824 | 29,64406 | 28,51537 | 28,73463 | 30,31959 | 30,06958 |
| 31,08772 | 30,64736 | 31,39719 | 31,11787 | 31,49815 | 31,23026 | 31,08715 | 31,30883 | 31,2161  |
| 22,48696 | 23,48598 | 22,96295 | 25,59269 | 25,5305  | 25,10185 | 25,35279 | 24,66536 | 25,05383 |
| 26,77568 | 23,67122 | 27,37426 | 26,84182 | 26,88344 | 26,01937 | 25,8469  | 26,18799 | 26,702   |
| 23,47735 | 23,90008 | 23,88922 | 23,2737  | 23,33624 | 23,76486 | 23,2089  | 23,51364 | 24,24561 |

|          |          |          |          |          |          |          |          |          |
|----------|----------|----------|----------|----------|----------|----------|----------|----------|
| 22,53613 | 23,74615 | 23,54647 | 25,32358 | 24,49582 | 24,10509 | 23,78548 | 23,13526 | 24,43243 |
| 28,64038 | 28,47406 | 29,14611 | 29,47485 | 28,93306 | 28,28498 | 28,2889  | 27,83286 | 28,09053 |
| 29,46527 | 28,86555 | 29,29649 | 28,86938 | 29,17762 | 28,87132 | 28,94419 | 29,59793 | 29,31106 |
| 27,06938 | 28,89143 | 28,26526 | 27,44261 | 27,41973 | 27,19639 | 27,51796 | 26,59974 | 26,78207 |
| 31,45405 | 31,32876 | 30,25327 | 31,0185  | 31,25175 | 30,93227 | 31,12368 | 31,43251 | 31,40009 |
| 32,5143  | 31,86172 | 32,04274 | 32,38851 | 32,54153 | 32,39657 | 32,43649 | 32,79676 | 32,60309 |
| 30,11496 | 29,17999 | 28,50233 | 30,25777 | 29,8096  | 29,40576 | 29,48535 | 30,18707 | 29,51655 |
| 27,49579 | 26,13406 | 25,21182 | 26,31403 | 26,73376 | 27,57087 | 27,8052  | 28,65363 | 28,81427 |
| 31,02373 | 31,7677  | 31,75561 | 31,30721 | 31,30948 | 31,69499 | 31,41825 | 30,72972 | 31,02281 |
| 27,14092 | 26,77228 | 27,16959 | 27,53349 | 27,53705 | 27,61034 | 27,64972 | 27,46521 | 27,64113 |
| 28,46443 | 27,67445 | 27,16615 | 27,87496 | 22,43601 | 28,38059 | 27,90029 | 29,15318 | 29,11966 |
| 26,15194 | 26,13663 | 26,40391 | 26,1744  | 25,58695 | 25,60925 | 25,44594 | 24,83359 | 24,6608  |
| 28,86977 | 28,23768 | 28,17874 | 27,6006  | 27,57167 | 27,58914 | 27,88367 | 28,00774 | 27,87121 |
| 27,03601 | 26,83581 | 26,9506  | 22,51562 | 27,15808 | 26,49095 | 26,48205 | 27,01041 | 26,90633 |
| 24,22059 | 25,35528 | 25,29018 | 24,60156 | 24,26556 | 24,5428  | 24,76157 | 24,10556 | 22,01563 |
| 28,37248 | 27,89389 | 29,32772 | 28,45128 | 27,78457 | 27,89192 | 27,72858 | 28,12623 | 27,99205 |
| 26,14332 | 23,01189 | 24,33834 | 27,70088 | 23,52517 | 23,64966 | 22,34579 | 27,47839 | 28,50415 |
| 27,54399 | 25,67411 | 26,14766 | 27,58628 | 27,5059  | 27,32174 | 27,3808  | 28,95366 | 29,51783 |
| 22,40098 | 23,81693 | 23,63272 | 26,63145 | 26,90392 | 27,20909 | 22,62445 | 26,7656  | 26,85222 |
| 28,62429 | 26,96345 | 27,71476 | 28,46848 | 28,2867  | 27,39526 | 27,73841 | 28,50469 | 28,57838 |
| 28,73053 | 24,52453 | 28,43924 | 28,86414 | 28,93092 | 28,77878 | 22,56012 | 23,16895 | 28,88824 |
| 22,22519 | 24,05714 | 23,08479 | 20,84115 | 20,80986 | 20,17731 | 20,20192 | 21,1201  | 21,69238 |
| 21,90548 | 23,68897 | 23,85056 | 25,06817 | 23,37174 | 25,15623 | 24,58164 | 22,24401 | 21,58573 |
| 27,4773  | 26,69458 | 28,40807 | 28,08233 | 27,94078 | 26,12778 | 26,64045 | 27,4259  | 27,39395 |
| 25,24107 | 23,69519 | 23,87995 | 25,01504 | 24,50355 | 23,90812 | 24,18526 | 26,31443 | 26,06079 |
| 30,49486 | 31,13663 | 32,0949  | 30,66195 | 29,75248 | 32,0186  | 31,615   | 30,53557 | 30,70471 |
| 27,68759 | 27,50385 | 28,24354 | 28,02189 | 26,97913 | 26,97978 | 27,68746 | 26,87467 | 26,90323 |
| 27,59634 | 27,47057 | 27,37923 | 28,11753 | 27,47908 | 28,82642 | 28,21933 | 28,18834 | 28,32693 |
| 22,38697 | 23,94143 | 25,0925  | 25,21749 | 22,11606 | 22,6314  | 25,75771 | 24,90724 | 22,14161 |
| 23,78216 | 26,74496 | 26,26912 | 26,66655 | 26,46883 | 26,35175 | 26,35805 | 26,64733 | 26,30196 |
| 33,49441 | 32,92128 | 32,59539 | 32,3817  | 32,26994 | 32,90683 | 32,90919 | 33,27711 | 33,37036 |
| 23,67721 | 22,78137 | 23,41876 | 26,10536 | 26,18569 | 25,36903 | 25,84886 | 23,16877 | 21,86169 |
| 25,58569 | 23,1495  | 22,57251 | 24,56248 | 27,52709 | 26,79613 | 26,39562 | 25,28355 | 24,47191 |
| 27,75513 | 28,21183 | 27,7604  | 26,90529 | 26,82905 | 27,53646 | 26,94905 | 26,56261 | 26,16398 |
| 29,76917 | 28,95427 | 28,57236 | 29,82902 | 30,14722 | 29,61994 | 30,10762 | 31,08759 | 31,39622 |
| 27,97104 | 24,13355 | 23,53183 | 25,66793 | 26,47122 | 22,09738 | 26,35919 | 29,65397 | 28,37335 |
| 24,58526 | 25,44518 | 25,80934 | 25,38788 | 25,90371 | 25,1848  | 25,36262 | 25,01636 | 25,70197 |
| 26,35753 | 25,14492 | 26,15178 | 27,13575 | 27,41579 | 25,93001 | 25,80102 | 26,41308 | 26,95005 |
| 29,00715 | 28,8387  | 29,76729 | 29,54305 | 29,31948 | 28,25399 | 29,28131 | 28,55421 | 28,74156 |
| 29,21792 | 32,58394 | 30,50654 | 28,12623 | 30,26919 | 29,19049 | 29,2372  | 26,63409 | 22,71205 |
| 29,22757 | 23,924   | 26,58721 | 27,54399 | 21,78727 | 27,06548 | 26,48171 | 29,63819 | 30,59495 |
| 29,96939 | 29,87926 | 28,24984 | 28,92269 | 29,53094 | 29,31214 | 29,26177 | 30,53853 | 30,19531 |
| 27,03149 | 27,33142 | 27,70081 | 27,11038 | 27,41716 | 26,63048 | 27,27622 | 26,92785 | 27,31829 |
| 30,34467 | 30,25372 | 30,40761 | 30,49343 | 30,13198 | 29,22607 | 29,44213 | 29,93312 | 29,39983 |
| 26,32978 | 25,5773  | 25,67737 | 27,30042 | 27,01595 | 27,28569 | 26,81115 | 26,51752 | 27,29413 |
| 23,30494 | 25,02753 | 24,20769 | 21,66731 | 21,06474 | 24,80292 | 24,66129 | 23,87211 | 23,80055 |
| 22,7308  | 23,63123 | 24,27583 | 26,40868 | 26,53424 | 27,85412 | 27,98462 | 27,96505 | 27,55311 |
| 23,01668 | 23,20372 | 24,27764 | 26,49803 | 26,36123 | 21,74912 | 26,1163  | 23,94667 | 22,99179 |
| 23,00669 | 23,45689 | 22,91417 | 22,25534 | 24,40763 | 23,71639 | 23,2798  | 23,6228  | 24,35692 |
| 23,84414 | 24,56426 | 24,14361 | 26,90047 | 27,01797 | 23,04612 | 26,99194 | 23,29207 | 21,7728  |

|          |          |          |          |          |          |          |          |          |
|----------|----------|----------|----------|----------|----------|----------|----------|----------|
| 27,69737 | 26,80772 | 26,85555 | 28,44892 | 27,86455 | 28,01143 | 27,57427 | 28,09119 | 28,61376 |
| 32,21095 | 32,23803 | 32,37464 | 32,07061 | 31,97004 | 32,08949 | 31,83217 | 31,84176 | 31,17146 |
| 26,73104 | 25,19689 | 24,38988 | 22,31128 | 25,25555 | 24,68581 | 23,04007 | 23,24094 | 22,1104  |
| 23,23996 | 24,51734 | 23,0489  | 24,38555 | 22,96906 | 23,09225 | 23,3615  | 21,63014 | 21,64979 |
| 33,1712  | 32,76987 | 31,82775 | 32,78755 | 32,74049 | 32,65612 | 32,74585 | 33,03581 | 32,32381 |
| 33,56207 | 33,87646 | 33,62843 | 33,68301 | 34,18844 | 34,17913 | 34,08417 | 33,73721 | 32,55218 |
| 23,21048 | 24,95903 | 25,34147 | 24,46065 | 26,02003 | 22,13707 | 22,23981 | 25,55888 | 25,82129 |
| 28,62048 | 28,59463 | 28,16322 | 28,52099 | 28,36035 | 28,34617 | 28,57015 | 27,47212 | 27,3232  |
| 27,19563 | 26,77944 | 26,91718 | 26,77291 | 27,0135  | 27,20844 | 26,25686 | 26,69485 | 26,17672 |
| 29,05012 | 28,27177 | 27,92156 | 28,84554 | 27,93123 | 28,2327  | 28,08618 | 28,54197 | 28,47119 |
| 28,27728 | 24,215   | 24,57643 | 27,95427 | 26,79699 | 22,89161 | 26,77744 | 28,58499 | 28,03601 |
| 30,5313  | 28,74301 | 29,35727 | 30,95387 | 30,81261 | 29,55379 | 28,98414 | 30,88664 | 30,98956 |
| 22,72538 | 22,34425 | 21,81765 | 23,43149 | 21,9234  | 21,65298 | 21,76786 | 22,38853 | 21,80982 |
| 25,93488 | 26,56552 | 26,27538 | 27,25953 | 26,7604  | 27,72702 | 27,55186 | 27,5742  | 27,85792 |
| 30,49895 | 30,54563 | 31,03636 | 31,73884 | 31,96558 | 31,36124 | 31,4488  | 31,45983 | 31,59072 |
| 29,78499 | 29,14092 | 28,8289  | 29,47299 | 29,28615 | 29,43408 | 29,58163 | 29,46194 | 29,64397 |
| 23,25643 | 23,04572 | 22,66345 | 23,46148 | 22,90094 | 23,43582 | 23,54321 | 24,35057 | 24,77258 |
| 29,98251 | 29,46474 | 29,52045 | 29,93818 | 30,00638 | 29,49331 | 29,8263  | 30,06111 | 29,98861 |
| 30,53399 | 31,64255 | 31,45988 | 32,47361 | 31,34022 | 21,94433 | 30,41901 | 30,48693 | 23,17258 |
| 29,03701 | 27,4182  | 27,61744 | 30,29428 | 30,01478 | 29,87616 | 30,71498 | 26,92717 | 27,37103 |
| 29,41945 | 28,1755  | 27,99572 | 28,05388 | 27,88745 | 28,8979  | 28,90722 | 28,08811 | 28,4265  |
| 29,86488 | 29,6667  | 29,86606 | 30,12139 | 29,96637 | 29,59092 | 29,0759  | 29,22869 | 29,25798 |
| 26,29667 | 25,03846 | 24,52492 | 25,97248 | 25,33504 | 25,60096 | 26,30412 | 24,09491 | 24,71654 |
| 27,38492 | 28,44091 | 27,86685 | 27,42926 | 27,12416 | 28,70606 | 28,12297 | 27,77769 | 27,13065 |
| 29,24704 | 28,01919 | 28,46486 | 27,12475 | 27,50127 | 27,40162 | 27,56761 | 28,76853 | 29,01962 |
| 26,1668  | 27,14763 | 26,99043 | 26,60442 | 26,65335 | 27,12839 | 27,13193 | 25,5854  | 25,88229 |
| 22,12114 | 23,35111 | 23,77726 | 22,72528 | 23,21424 | 22,32888 | 23,98546 | 24,90405 | 23,08309 |
| 21,43329 | 21,26316 | 23,21829 | 21,77338 | 21,94389 | 23,43033 | 22,17335 | 21,88558 | 23,09263 |
| 23,27266 | 23,05515 | 24,49419 | 28,20527 | 23,44089 | 22,41971 | 23,52586 | 28,58692 | 28,11098 |
| 25,57245 | 23,58268 | 25,70585 | 23,47914 | 23,83335 | 25,23169 | 24,42541 | 23,34204 | 24,55397 |
| 27,6803  | 22,83008 | 27,2553  | 26,95638 | 27,37625 | 28,4215  | 27,46886 | 28,86166 | 27,3435  |
| 26,15642 | 26,49176 | 26,30198 | 26,3562  | 26,16638 | 26,56796 | 26,51907 | 26,16265 | 26,14602 |
| 27,24336 | 28,7107  | 23,02098 | 27,99916 | 28,12204 | 28,44762 | 28,63786 | 28,07086 | 28,57532 |
| 22,48635 | 23,09693 | 24,33101 | 23,50749 | 23,4279  | 23,46438 | 23,98442 | 22,792   | 22,30644 |
| 26,7406  | 27,39648 | 27,47885 | 26,64636 | 26,88367 | 27,06569 | 27,16873 | 27,61147 | 27,93061 |
| 27,87473 | 26,84828 | 26,64403 | 24,01014 | 22,0047  | 23,69696 | 22,98111 | 23,15847 | 24,53848 |
| 31,02538 | 28,0608  | 26,95283 | 29,20121 | 28,55677 | 20,3209  | 23,47313 | 29,68667 | 28,82845 |
| 27,63319 | 25,07255 | 25,58253 | 28,68067 | 28,78544 | 27,80101 | 27,63409 | 28,96416 | 29,14397 |
| 23,18387 | 21,93488 | 23,89936 | 22,62006 | 22,4368  | 23,5451  | 22,93451 | 22,33549 | 22,08537 |
| 26,06747 | 26,14028 | 26,19261 | 25,5405  | 24,27242 | 24,804   | 22,52962 | 23,97202 | 24,54699 |
| 20,66865 | 22,29856 | 22,86931 | 21,98116 | 22,22385 | 21,91947 | 22,37928 | 22,00295 | 21,68611 |
| 22,87826 | 27,17693 | 26,35365 | 27,31077 | 22,16631 | 26,01827 | 23,9734  | 28,36415 | 26,89446 |
| 22,46193 | 24,14566 | 23,93981 | 22,21463 | 22,41504 | 22,0996  | 22,17139 | 22,28238 | 22,73144 |
| 29,34995 | 30,30791 | 29,86489 | 29,35098 | 29,56202 | 29,8237  | 30,01265 | 29,09605 | 29,22467 |
| 25,43825 | 25,71874 | 26,0371  | 25,00924 | 25,57306 | 25,1314  | 25,22902 | 23,40778 | 24,62851 |
| 33,84633 | 33,18176 | 32,9191  | 34,94026 | 34,86277 | 34,7928  | 34,7456  | 34,83479 | 34,94576 |
| 30,32571 | 30,38061 | 29,69471 | 28,77445 | 28,88037 | 28,9153  | 29,22858 | 29,26152 | 29,23364 |
| 26,60484 | 26,35755 | 27,0202  | 27,37708 | 27,16029 | 27,31363 | 27,36853 | 25,76352 | 26,29381 |
| 28,24173 | 28,04682 | 28,11981 | 28,26481 | 28,57275 | 28,65615 | 28,37683 | 27,85293 | 27,32852 |
| 28,94824 | 27,49694 | 26,82177 | 27,39534 | 26,58663 | 28,36507 | 28,20186 | 27,2893  | 27,09305 |

|          |          |          |          |          |          |          |          |          |
|----------|----------|----------|----------|----------|----------|----------|----------|----------|
| 31,21714 | 31,15509 | 31,74727 | 29,25818 | 28,87643 | 29,77217 | 30,3184  | 29,67677 | 28,89209 |
| 23,78097 | 24,24307 | 25,10033 | 24,19753 | 23,75817 | 24,66096 | 24,51147 | 24,51244 | 24,22118 |
| 25,80181 | 27,30374 | 27,68117 | 28,20662 | 28,06332 | 27,5666  | 27,60625 | 26,79959 | 27,09073 |
| 30,52673 | 30,50503 | 30,39479 | 30,92741 | 30,84236 | 31,31484 | 31,244   | 31,09213 | 31,13589 |
| 30,80186 | 30,69835 | 30,70347 | 31,23186 | 31,23181 | 30,83996 | 30,74166 | 31,29082 | 31,40202 |
| 20,94663 | 25,10793 | 29,54775 | 29,44782 | 23,03416 | 29,40538 | 29,19777 | 29,74551 | 28,54878 |
| 28,80999 | 28,71509 | 28,60918 | 28,03239 | 28,31825 | 28,30138 | 28,43583 | 29,45138 | 29,59557 |
| 32,08724 | 31,52272 | 31,39018 | 31,12805 | 31,05349 | 30,89829 | 31,05226 | 32,28653 | 32,35935 |
| 21,37512 | 22,7043  | 21,79578 | 23,34055 | 23,29488 | 23,16682 | 23,1216  | 21,44602 | 21,38864 |
| 21,08503 | 22,76161 | 23,87801 | 23,80747 | 22,82011 | 21,57761 | 22,86011 | 27,84356 | 27,88681 |
| 26,98512 | 23,88829 | 25,92445 | 25,79927 | 25,93492 | 27,40965 | 27,26428 | 27,23726 | 27,24245 |
| 28,7162  | 28,86865 | 28,6635  | 28,6732  | 28,22605 | 28,45517 | 28,25948 | 28,63775 | 28,65458 |
| 29,0598  | 29,72306 | 29,90124 | 28,15528 | 28,18253 | 29,42274 | 29,04757 | 27,12495 | 27,30496 |
| 22,41892 | 21,9556  | 26,00719 | 26,80587 | 27,00089 | 26,6245  | 26,67681 | 26,63506 | 26,22015 |
| 29,99105 | 30,73731 | 30,59566 | 28,90779 | 28,90976 | 30,09043 | 30,21048 | 29,82221 | 29,62558 |
| 26,36351 | 24,09426 | 23,43975 | 21,1175  | 25,6198  | 24,95832 | 25,10386 | 25,21593 | 25,46588 |
| 31,72082 | 30,41649 | 30,87298 | 32,31355 | 32,22556 | 30,76975 | 31,00691 | 32,54494 | 32,64534 |
| 32,07333 | 31,20705 | 31,79579 | 32,15551 | 32,04954 | 31,58289 | 31,57808 | 31,72428 | 31,43226 |
| 30,47383 | 30,22205 | 30,35374 | 30,26953 | 29,9057  | 30,05892 | 30,18966 | 29,8763  | 29,84151 |
| 27,64952 | 27,24627 | 27,75015 | 26,81982 | 27,20051 | 27,89735 | 27,65895 | 26,94213 | 27,03276 |
| 28,17693 | 22,669   | 27,6284  | 28,16111 | 28,41679 | 28,05352 | 27,52716 | 28,37902 | 28,13536 |
| 32,43964 | 31,66072 | 31,17665 | 34,3535  | 34,38985 | 33,92344 | 33,84763 | 34,53907 | 34,4746  |
| 27,63437 | 24,60421 | 23,3362  | 27,51187 | 27,37152 | 22,66718 | 24,74349 | 27,94436 | 27,13663 |
| 28,76202 | 29,10482 | 27,51923 | 29,5136  | 29,89116 | 30,42722 | 29,85855 | 29,03499 | 29,16816 |
| 31,91812 | 31,49729 | 31,76746 | 31,74021 | 32,05985 | 32,19759 | 32,46127 | 32,38785 | 32,43547 |
| 28,07572 | 28,64599 | 30,51625 | 25,26263 | 24,3812  | 26,74098 | 27,54458 | 24,61745 | 25,62589 |
| 27,91536 | 26,85626 | 27,82019 | 27,62401 | 27,78625 | 27,58771 | 27,64746 | 26,86207 | 27,31173 |
| 27,46544 | 27,27044 | 28,29281 | 28,24812 | 28,54374 | 27,47576 | 27,75251 | 27,67721 | 27,64856 |
| 23,619   | 22,80758 | 24,78621 | 24,2452  | 21,4702  | 22,93478 | 22,62632 | 27,23781 | 26,85875 |
| 27,90621 | 23,60109 | 25,8839  | 28,06358 | 28,09984 | 22,3937  | 22,48816 | 28,32225 | 27,60406 |
| 31,3891  | 32,20644 | 31,21784 | 31,12712 | 31,16075 | 32,05462 | 31,98217 | 31,1827  | 31,06676 |
| 35,727   | 35,08001 | 34,21993 | 35,31125 | 35,36708 | 34,7692  | 34,89767 | 35,99507 | 36,21522 |
| 27,78075 | 25,62995 | 26,9862  | 28,32822 | 27,9165  | 26,24567 | 26,04947 | 28,63682 | 27,9645  |
| 26,8405  | 27,13956 | 27,20359 | 26,94044 | 27,01073 | 26,72546 | 26,91319 | 27,10179 | 26,94949 |
| 33,14163 | 33,0862  | 33,01676 | 32,73808 | 32,75444 | 32,81086 | 32,49651 | 32,88815 | 32,58511 |
| 28,97509 | 28,84161 | 27,99226 | 28,70902 | 29,11279 | 29,50673 | 29,20676 | 29,74953 | 29,41581 |
| 26,53551 | 26,10412 | 25,55915 | 26,66384 | 25,96404 | 26,32924 | 26,47822 | 26,15151 | 25,37518 |
| 24,86117 | 24,58233 | 24,77077 | 24,16615 | 21,33634 | 22,8082  | 23,02755 | 24,55356 | 23,5323  |
| 27,41345 | 27,08192 | 26,77027 | 26,86479 | 27,41401 | 25,27459 | 25,02644 | 26,20646 | 25,87446 |
| 27,04302 | 26,42065 | 26,76307 | 27,92224 | 27,7395  | 26,83509 | 26,89018 | 27,84667 | 27,64746 |
| 32,24073 | 32,4552  | 32,24505 | 30,98346 | 31,16423 | 32,62991 | 32,65057 | 31,34409 | 31,77999 |
| 32,34393 | 32,45435 | 32,4553  | 32,94348 | 32,95486 | 32,43572 | 32,60366 | 32,71596 | 32,97266 |
| 30,05672 | 29,71406 | 30,27453 | 30,81138 | 30,90792 | 29,45875 | 29,50932 | 30,14819 | 30,21037 |
| 25,77042 | 26,13144 | 26,3175  | 26,07843 | 26,08483 | 26,78818 | 26,09887 | 24,87235 | 25,29915 |
| 28,89357 | 28,32582 | 28,6976  | 29,45996 | 29,7921  | 29,70604 | 29,07184 | 30,20455 | 30,12842 |
| 32,37023 | 33,27378 | 33,19432 | 32,67712 | 32,71778 | 33,38317 | 33,51136 | 32,40586 | 32,37746 |
| 27,82457 | 22,22908 | 26,8411  | 28,13467 | 27,67101 | 27,37815 | 26,85958 | 27,07449 | 26,65567 |
| 22,98498 | 23,10019 | 24,09997 | 22,65718 | 23,60543 | 21,79398 | 23,99501 | 22,06209 | 23,02199 |
| 22,69794 | 22,9823  | 25,89069 | 26,70807 | 25,99596 | 21,42328 | 25,08148 | 26,87091 | 26,11504 |
| 22,44216 | 22,29515 | 21,8745  | 26,8918  | 27,93343 | 22,3351  | 23,1682  | 27,71803 | 27,88821 |

|                                                                                        |          |          |          |          |          |          |          |          |
|----------------------------------------------------------------------------------------|----------|----------|----------|----------|----------|----------|----------|----------|
| 28,86847                                                                               | 25,22255 | 23,93872 | 28,67949 | 28,82271 | 28,34875 | 28,94827 | 29,42582 | 30,35174 |
| 27,409                                                                                 | 29,02929 | 28,78812 | 26,86962 | 27,06589 | 28,87678 | 28,89235 | 26,98    | 26,92343 |
| 21,14364                                                                               | 22,45959 | 21,6066  | 23,11883 | 23,52409 | 21,33205 | 22,62649 | 23,46276 | 23,12591 |
| 28,06902                                                                               | 26,75175 | 22,9078  | 28,69942 | 28,62457 | 26,73854 | 27,21234 | 28,70547 | 28,86124 |
| 28,45591                                                                               | 27,97115 | 25,94675 | 30,13931 | 30,33543 | 29,29721 | 29,07702 | 30,74671 | 30,57362 |
| 28,08396                                                                               | 28,29772 | 27,10669 | 27,45772 | 27,76989 | 21,23318 | 27,06969 | 28,09018 | 28,31385 |
| 32,25367                                                                               | 31,42842 | 31,05543 | 32,6382  | 32,8189  | 30,53751 | 30,67152 | 33,03574 | 32,60869 |
| 21,83059                                                                               | 22,35942 | 23,95503 | 22,99011 | 22,52471 | 22,67241 | 22,55497 | 23,16306 | 23,2048  |
| 24,49363                                                                               | 25,39369 | 25,63425 | 25,80092 | 25,88462 | 26,39831 | 26,72988 | 23,14286 | 25,68035 |
| 28,25142                                                                               | 28,18698 | 28,13892 | 27,08172 | 26,78731 | 28,6101  | 28,57236 | 27,50385 | 27,46599 |
| 29,18348                                                                               | 29,40099 | 28,37952 | 29,30898 | 29,31954 | 29,29999 | 29,52232 | 30,40304 | 30,03486 |
| 22,35912                                                                               | 23,95871 | 21,64258 | 23,57819 | 22,99253 | 21,29182 | 21,36832 | 24,78731 | 24,35057 |
| 28,59399                                                                               | 28,64935 | 28,3438  | 28,34164 | 28,56107 | 28,7376  | 28,03249 | 28,91088 | 28,1472  |
| 23,26826                                                                               | 27,42005 | 26,16066 | 26,02789 | 26,17493 | 27,22894 | 27,662   | 25,26964 | 22,28789 |
| 27,09154                                                                               | 27,17693 | 23,85863 | 22,72165 | 27,13438 | 26,72078 | 26,47979 | 21,88856 | 25,99466 |
| 26,93348                                                                               | 25,91684 | 25,40669 | 24,97456 | 26,01767 | 26,10015 | 26,38017 | 26,146   | 25,63702 |
| 29,70532                                                                               | 30,88729 | 30,16854 | 28,60038 | 28,53267 | 30,07915 | 30,23421 | 28,67074 | 28,63737 |
| 29,74069                                                                               | 27,99857 | 28,44221 | 29,78396 | 29,52427 | 29,45252 | 29,43796 | 30,38915 | 30,22768 |
| 23,89384                                                                               | 24,98298 | 24,33845 | 23,1695  | 22,83973 | 24,19528 | 24,15267 | 22,20413 | 22,43987 |
| 27,79371                                                                               | 27,19094 | 27,70372 | 28,74622 | 29,1228  | 28,4729  | 28,49102 | 29,57782 | 29,8098  |
| 28,50881                                                                               | 27,51089 | 27,90828 | 28,44557 | 28,73841 | 28,99021 | 28,80557 | 28,76819 | 28,57578 |
| 27,09778                                                                               | 28,37061 | 27,34087 | 27,58606 | 28,19315 | 29,02324 | 28,3803  | 27,94921 | 28,35094 |
| 26,33748                                                                               | 23,30331 | 25,61288 | 27,87596 | 27,00689 | 25,76532 | 25,80087 | 26,28348 | 26,59548 |
| 23,76749                                                                               | 27,1333  | 26,10571 | 22,37297 | 24,27405 | 25,9091  | 26,6363  | 24,42316 | 24,67955 |
| 28,4394                                                                                | 29,1112  | 29,40734 | 28,72994 | 28,32444 | 28,37886 | 27,92914 | 26,89504 | 27,72286 |
| 27,38278                                                                               | 28,32813 | 27,62819 | 28,76294 | 27,96752 | 27,93703 | 27,80538 | 27,67324 | 28,35288 |
| 29,42906                                                                               | 29,21403 | 29,45862 | 29,81929 | 30,12657 | 29,93551 | 29,57002 | 29,90985 | 30,32152 |
| 29,70731                                                                               | 30,41084 | 27,82766 | 27,80655 | 27,55391 | 26,67101 | 28,73386 | 28,55757 | 28,7679  |
| 25,23356                                                                               | 26,33668 | 24,68886 | 24,4084  | 24,56209 | 26,16092 | 25,99401 | 23,71963 | 24,19764 |
| 28,70514                                                                               | 29,27173 | 29,10652 | 29,75592 | 29,60495 | 27,91085 | 29,09439 | 23,45103 | 29,32959 |
| 28,92337                                                                               | 29,32068 | 29,82935 | 28,1907  | 29,30967 | 28,75875 | 28,64375 | 28,84852 | 28,08639 |
| 28,39334                                                                               | 29,27344 | 27,98462 | 25,62171 | 25,95491 | 26,39537 | 27,39174 | 27,75786 | 27,45301 |
| 28,35368                                                                               | 27,61267 | 26,77128 | 27,12001 | 23,49497 | 27,9723  | 28,18461 | 28,13506 | 27,65928 |
| 26,15244                                                                               | 28,02205 | 27,40251 | 22,93626 | 21,8841  | 27,4373  | 28,38414 | 22,43506 | 21,28574 |
| 28,20592                                                                               | 29,57266 | 28,76135 | 28,06327 | 28,50116 | 28,72306 | 29,16674 | 27,72468 | 28,35069 |
| 37,42421                                                                               | 38,73302 | 38,14632 | 37,56347 | 37,76457 | 39,12461 | 39,19818 | 38,10963 | 38,10559 |
| 24,86815                                                                               | 25,55318 | 24,44979 | 26,60399 | 26,9215  | 27,41828 | 26,91969 | 25,86976 | 26,79687 |
| 30,00437                                                                               | 30,95768 | 31,37932 | 29,33731 | 29,04497 | 31,8546  | 31,86924 | 29,74962 | 29,76882 |
| 33,4021                                                                                | 33,25462 | 32,80859 | 33,53125 | 33,70419 | 33,37244 | 33,57678 | 33,78107 | 33,82231 |
| 22,39099                                                                               | 22,82568 | 23,34163 | 29,5508  | 30,38618 | 27,79123 | 22,99408 | 31,32254 | 31,28312 |
| 23,98237                                                                               | 23,15892 | 23,08046 | 28,98454 | 28,68949 | 22,54555 | 22,31535 | 29,65041 | 29,91613 |
| 25,87103                                                                               | 22,70381 | 27,51443 | 28,61765 | 29,86532 | 24,29221 | 26,28829 | 29,95421 | 28,29167 |
| 6MJEO_HU tr A0A1D6ZNI8 A0A1D6ZNI8_HUMAN MHC class I antigen (Fragment) OS=Homo sapiens |          |          |          |          |          |          |          |          |
| 22,87294                                                                               | 22,8583  | 23,72993 | 27,1518  | 23,52378 | 22,30649 | 21,8716  | 28,1249  | 28,01036 |
| 23,24184                                                                               | 25,25133 | 23,87793 | 22,94744 | 22,44208 | 24,57404 | 24,97657 | 23,29908 | 22,72538 |
| 24,52641                                                                               | 24,32745 | 22,21216 | 29,76836 | 29,95754 | 30,88103 | 31,05601 | 30,82533 | 29,67459 |
| 30,33947                                                                               | 28,09894 | 28,59385 | 30,34794 | 29,98726 | 29,70336 | 30,16591 | 29,10734 | 29,01404 |
| 28,38681                                                                               | 28,48585 | 28,70879 | 29,32706 | 30,13516 | 28,76816 | 28,2122  | 29,11647 | 28,88899 |
| 28,80649                                                                               | 28,7424  | 28,63395 | 28,24127 | 28,88405 | 28,61041 | 28,39844 | 28,49209 | 28,58223 |
| 33,24076                                                                               | 33,12498 | 33,48015 | 33,36071 | 33,09248 | 32,49522 | 32,63644 | 32,6707  | 32,82423 |

|          |          |          |          |          |          |          |          |          |
|----------|----------|----------|----------|----------|----------|----------|----------|----------|
| 30,90821 | 30,49895 | 28,22628 | 29,54652 | 29,25636 | 29,20595 | 29,30136 | 30,01185 | 30,42352 |
| 27,32672 | 27,07816 | 27,07908 | 23,25214 | 21,07985 | 26,08558 | 22,13194 | 20,47863 | 22,74585 |
| 30,37223 | 31,0658  | 30,05453 | 30,20233 | 30,64341 | 30,85162 | 22,18038 | 30,42542 | 30,56047 |
| 32,99998 | 30,75756 | 31,38283 | 34,14186 | 33,95593 | 33,23891 | 32,67272 | 33,22777 | 33,01876 |
| 23,78987 | 22,73767 | 24,36073 | 22,48009 | 28,41708 | 23,01492 | 22,59114 | 29,18362 | 29,21988 |
| 27,43913 | 28,14739 | 24,51552 | 28,59602 | 28,23759 | 22,3943  | 27,99841 | 22,1329  | 27,55054 |
| 27,87079 | 28,04323 | 27,51668 | 27,61996 | 27,93326 | 27,3379  | 27,7082  | 29,23938 | 29,22041 |

| LFQ intens | LFQ intens | Potential c | Student's T | Student's T | Peptides | Razor + un | Unique peptides | Sequence coverage |
|------------|------------|-------------|-------------|-------------|----------|------------|-----------------|-------------------|
| 3          | 3          |             |             |             |          |            |                 |                   |
| 30,2014    | 30,51841   | +           |             |             | 11       | 11         | 11              | 75,3              |
| 27,47568   | 32,87364   | +           |             |             | 28       | 28         | 6               | 64,6              |
| 22,47785   | 30,51427   | +           |             |             | 29       | 17         | 3               | 46,1              |
| 22,98594   | 25,6666    | +           |             |             | 24       | 13         | 13              | 55                |
| 24,41796   | 24,93535   | +           |             |             | 20       | 17         | 16              | 43,5              |
| 27,7845    | 34,07933   | +           |             |             | 34       | 34         | 8               | 45,3              |
| 25,49537   | 22,65014   | +           |             |             | 16       | 15         | 15              | 41,6              |
| 20,61423   | 30,23261   | +           |             |             | 25       | 13         | 12              | 57,6              |
| 27,20592   | 22,63946   |             |             |             | 2        | 2          | 2               | 28,6              |
| 21,7265    | 20,35057   |             |             |             | 2        | 2          | 2               | 18,8              |
| 30,30171   | 30,06201   | +           | 2_3         |             | 18       | 18         | 3               | 26,5              |
| 23,09436   | 24,24235   |             |             |             | 3        | 3          | 3               | 5,1               |
| 34,17042   | 33,84652   |             |             |             | 70       | 70         | 70              | 51,8              |
| 24,45632   | 25,07292   |             |             |             | 4        | 4          | 1               | 18,2              |
| 32,66465   | 32,65151   |             |             |             | 21       | 21         | 6               | 63,5              |
| 22,90845   | 23,64265   |             |             |             | 2        | 2          | 2               | 5,9               |
| 21,30471   | 22,27878   |             |             |             | 2        | 2          | 2               | 12,3              |
| 33,04968   | 32,51022   |             |             |             | 105      | 105        | 105             | 39,2              |
| 26,48228   | 27,71646   |             |             |             | 11       | 11         | 1               | 22,7              |
| 28,66848   | 29,82502   |             |             |             | 30       | 22         | 22              | 42,2              |
| 26,17122   | 25,20165   |             |             |             | 5        | 5          | 5               | 6,2               |
| 31,53765   | 30,2683    |             |             |             | 5        | 5          | 5               | 39,7              |
| 27,15528   | 27,30669   | +           | 2_3         |             | 8        | 8          | 6               | 30,8              |
| 21,97597   | 22,60404   | +           | 2_3         |             | 3        | 3          | 3               | 11,3              |
| 28,50199   | 28,15764   |             |             |             | 11       | 11         | 11              | 20,3              |
| 27,83786   | 29,16813   |             |             |             | 27       | 27         | 26              | 14,9              |
| 21,99211   | 27,43643   |             |             |             | 10       | 10         | 10              | 29,8              |
| 22,73737   | 24,74796   |             |             |             | 6        | 6          | 6               | 7,4               |
| 28,69604   | 29,52217   | +           | 2_3         |             | 5        | 5          | 5               | 31,7              |
| 29,86137   | 27,6372    |             |             |             | 6        | 6          | 6               | 25,6              |
| 33,09179   | 33,19459   |             |             |             | 37       | 37         | 1               | 43,9              |
| 28,13501   | 22,22175   |             |             |             | 5        | 5          | 5               | 20,9              |
| 23,22935   | 26,05658   |             |             |             | 4        | 4          | 4               | 18,4              |
| 28,74945   | 29,10052   |             |             |             | 8        | 8          | 8               | 43                |
| 29,64069   | 30,2934    |             |             |             | 15       | 15         | 14              | 51,5              |
| 22,70791   | 24,7093    |             |             |             | 4        | 4          | 4               | 10,8              |
| 25,40788   | 25,35387   |             |             |             | 3        | 3          | 3               | 12,3              |
| 28,20741   | 25,89396   |             |             |             | 8        | 8          | 8               | 14,8              |
| 27,99145   | 27,2674    |             |             |             | 26       | 26         | 24              | 21,6              |
| 31,44618   | 31,4631    | +           | 2_3         |             | 8        | 8          | 8               | 83,2              |
| 29,78757   | 29,64566   |             |             |             | 7        | 7          | 7               | 50,7              |
| 28,67182   | 28,42146   |             |             |             | 11       | 11         | 11              | 15,4              |
| 32,01475   | 31,72012   |             |             |             | 2        | 2          | 2               | 29,8              |
| 22,40927   | 24,00084   |             |             |             | 2        | 2          | 2               | 30,8              |
| 22,03864   | 25,182     |             |             |             | 4        | 4          | 4               | 11                |
| 28,0004    | 27,1547    |             |             |             | 3        | 3          | 3               | 17                |
| 27,53148   | 28,49377   |             |             |             | 16       | 16         | 16              | 24,1              |
| 31,20432   | 31,15551   |             |             |             | 15       | 15         | 7               | 46,7              |

|          |          |   |     |     |    |    |      |
|----------|----------|---|-----|-----|----|----|------|
| 23,92379 | 23,30522 |   |     | 110 | 2  | 0  | 59,9 |
| 22,62042 | 23,47148 |   |     | 1   | 1  | 1  | 6,3  |
| 39,64786 | 40,11942 |   |     | 83  | 83 | 1  | 86,4 |
| 27,70807 | 29,21914 |   |     | 9   | 9  | 9  | 29,7 |
| 31,4446  | 31,74186 | + | 2_3 | 16  | 16 | 16 | 42   |
| 29,4308  | 29,30269 |   |     | 12  | 12 | 10 | 34,2 |
| 23,66297 | 23,16938 |   |     | 3   | 3  | 3  | 58,2 |
| 26,87853 | 25,42037 |   |     | 7   | 7  | 7  | 29,2 |
| 26,64623 | 27,34528 |   |     | 6   | 6  | 6  | 28,4 |
| 27,07296 | 27,94229 | + |     | 25  | 19 | 14 | 37,6 |
| 29,44583 | 25,93578 |   |     | 9   | 9  | 9  | 37,3 |
| 27,75168 | 23,33238 |   |     | 3   | 3  | 3  | 20,6 |
| 34,82941 | 34,81855 |   |     | 27  | 27 | 25 | 47,5 |
| 28,28476 | 28,96832 |   |     | 4   | 4  | 4  | 39,8 |
| 28,11083 | 27,75443 |   |     | 11  | 11 | 11 | 39   |
| 32,45405 | 31,01618 |   |     | 10  | 10 | 10 | 39,6 |
| 24,05117 | 25,27188 |   |     | 6   | 6  | 6  | 15,6 |
| 24,60162 | 24,63229 |   |     | 3   | 3  | 3  | 37,4 |
| 26,54038 | 26,44435 |   |     | 7   | 7  | 7  | 10,9 |
| 27,71581 | 28,31799 | + |     | 10  | 10 | 10 | 14,5 |
| 26,22245 | 28,21919 |   |     | 4   | 4  | 4  | 44,7 |
| 31,98512 | 33,03262 |   |     | 4   | 4  | 4  | 45,9 |
| 30,21188 | 29,05245 |   |     | 18  | 18 | 18 | 51,6 |
| 24,57097 | 25,78114 |   |     | 7   | 7  | 7  | 15,4 |
| 28,89888 | 29,60247 |   |     | 6   | 6  | 6  | 27,9 |
| 29,71363 | 21,02804 |   |     | 6   | 6  | 3  | 21,1 |
| 30,15231 | 27,78332 |   |     | 12  | 12 | 12 | 40,7 |
| 28,83533 | 29,82773 |   |     | 11  | 10 | 10 | 39,3 |
| 30,02472 | 31,08278 |   |     | 17  | 17 | 17 | 39,8 |
| 27,06497 | 27,54687 |   |     | 9   | 9  | 9  | 30,1 |
| 29,83017 | 30,49486 |   |     | 22  | 22 | 22 | 65,2 |
| 30,98352 | 31,59513 |   |     | 18  | 18 | 18 | 43,9 |
| 22,2937  | 25,29489 |   |     | 5   | 4  | 4  | 16,9 |
| 30,88074 | 30,92825 |   |     | 9   | 9  | 9  | 82,1 |
| 29,10702 | 29,76517 |   |     | 12  | 12 | 12 | 42,5 |
| 32,33111 | 31,71759 |   |     | 51  | 51 | 51 | 36,5 |
| 36,31932 | 36,28361 |   |     | 72  | 72 | 1  | 67,9 |
| 28,00443 | 28,85103 |   |     | 14  | 14 | 6  | 24,7 |
| 32,10793 | 32,37233 | + | 2_3 | 22  | 22 | 22 | 54,9 |
| 29,07694 | 28,57261 | + | 2_3 | 12  | 12 | 12 | 10   |
| 26,96939 | 28,13036 |   |     | 10  | 10 | 10 | 7,7  |
| 23,22929 | 22,0688  |   |     | 8   | 7  | 6  | 16,5 |
| 27,87085 | 28,74871 |   |     | 9   | 9  | 9  | 36,2 |
| 25,1225  | 24,67659 |   |     | 3   | 3  | 3  | 25,9 |
| 27,05258 | 26,74098 |   |     | 5   | 5  | 5  | 45,8 |
| 30,39489 | 27,65663 |   |     | 6   | 6  | 6  | 60   |
| 31,25496 | 30,96279 |   |     | 13  | 13 | 13 | 49,5 |
| 24,57306 | 24,00873 |   |     | 5   | 5  | 5  | 15   |
| 26,72481 | 27,25836 |   |     | 5   | 5  | 5  | 61   |
| 24,13085 | 22,86091 |   |     | 2   | 2  | 2  | 9,1  |



|          |          |   |     |    |    |    |      |
|----------|----------|---|-----|----|----|----|------|
| 23,92615 | 23,37663 |   |     | 9  | 6  | 4  | 16,8 |
| 28,17312 | 28,36102 |   |     | 7  | 7  | 7  | 57,7 |
| 29,11195 | 29,22637 |   |     | 28 | 28 | 28 | 20,2 |
| 26,89631 | 29,84933 |   |     | 3  | 3  | 3  | 32,4 |
| 31,51267 | 32,05937 |   |     | 26 | 26 | 26 | 45   |
| 32,76289 | 32,05148 |   |     | 57 | 57 | 57 | 48,3 |
| 29,70504 | 29,26924 |   |     | 15 | 15 | 12 | 28,5 |
| 28,65591 | 27,46544 |   |     | 8  | 8  | 8  | 11,1 |
| 30,71367 | 32,10659 |   |     | 31 | 31 | 23 | 45,9 |
| 27,3973  | 27,80489 |   |     | 8  | 8  | 8  | 17,3 |
| 28,72972 | 22,85296 |   |     | 2  | 2  | 2  | 10,4 |
| 25,12684 | 26,26031 |   |     | 9  | 9  | 9  | 15,2 |
| 28,37927 | 29,38264 |   |     | 15 | 15 | 15 | 23,4 |
| 27,25638 | 27,37219 |   |     | 4  | 4  | 4  | 25,6 |
| 22,38684 | 22,3639  | + | 2_3 | 4  | 4  | 3  | 10,7 |
| 27,63235 | 27,59278 |   |     | 4  | 4  | 4  | 36,9 |
| 28,08208 | 23,7703  |   |     | 1  | 1  | 1  | 8,2  |
| 28,57841 | 27,46669 |   |     | 15 | 15 | 15 | 18   |
| 27,10059 | 25,79726 |   |     | 7  | 7  | 7  | 16   |
| 28,42266 | 27,61982 |   |     | 14 | 13 | 4  | 23,6 |
| 22,04314 | 28,46303 |   |     | 4  | 4  | 4  | 15,5 |
| 21,42224 | 19,70838 |   |     | 2  | 2  | 2  | 26,9 |
| 26,05842 | 25,92295 |   |     | 3  | 3  | 3  | 6,1  |
| 28,12357 | 28,34177 |   |     | 7  | 7  | 7  | 24,2 |
| 25,89375 | 25,32711 | + | 2_3 | 6  | 6  | 6  | 35,2 |
| 30,21547 | 31,61986 |   |     | 5  | 5  | 5  | 6,6  |
| 26,86962 | 27,13985 |   |     | 14 | 14 | 14 | 17,7 |
| 27,85822 | 27,64877 |   |     | 6  | 6  | 6  | 51,3 |
| 25,46955 | 25,74981 |   |     | 8  | 8  | 8  | 9,4  |
| 26,56551 | 26,61526 |   |     | 5  | 5  | 5  | 26   |
| 33,19407 | 32,88736 |   |     | 18 | 18 | 18 | 65,3 |
| 24,02359 | 22,4964  | + | 2_3 | 2  | 2  | 2  | 21,4 |
| 26,76648 | 26,63948 |   |     | 4  | 4  | 4  | 20   |
| 26,27837 | 27,31769 |   |     | 25 | 24 | 24 | 15,3 |
| 30,8017  | 30,96237 | + | 2_3 | 8  | 8  | 8  | 53,4 |
| 28,90058 | 26,61583 |   |     | 5  | 5  | 5  | 17,7 |
| 25,07916 | 26,10211 |   |     | 3  | 3  | 3  | 29,8 |
| 26,33712 | 26,60964 |   |     | 7  | 7  | 7  | 13,5 |
| 28,69315 | 30,06625 |   |     | 5  | 5  | 2  | 31,8 |
| 27,77335 | 31,74053 |   |     | 5  | 5  | 3  | 70,8 |
| 30,15906 | 27,11862 |   |     | 5  | 5  | 5  | 23,6 |
| 30,52318 | 30,37389 | + | 2_3 | 13 | 13 | 4  | 30,9 |
| 28,05698 | 27,26785 |   |     | 15 | 15 | 15 | 19,5 |
| 29,78983 | 31,10905 |   |     | 7  | 7  | 7  | 33,2 |
| 27,1057  | 25,89901 |   |     | 7  | 7  | 7  | 38,2 |
| 23,78566 | 25,39061 |   |     | 58 | 1  | 0  | 42,8 |
| 27,3946  | 27,05765 |   |     | 13 | 13 | 13 | 5,9  |
| 21,65471 | 23,13136 |   |     | 5  | 5  | 5  | 21,4 |
| 23,61605 | 24,59007 |   |     | 4  | 4  | 4  | 26,8 |
| 23,14555 | 22,7834  | + | 2_3 | 2  | 2  | 2  | 2,7  |

|          |          |   |     |    |    |    |      |
|----------|----------|---|-----|----|----|----|------|
| 28,86994 | 27,17207 |   |     | 11 | 11 | 11 | 19,1 |
| 31,98077 | 32,86765 |   |     | 15 | 15 | 15 | 56,2 |
| 22,87529 | 22,73595 |   |     | 4  | 4  | 4  | 14,1 |
| 21,57464 | 22,0971  | + | 2_3 | 2  | 2  | 2  | 12   |
| 32,67082 | 32,5158  |   |     | 21 | 21 | 21 | 46,5 |
| 34,00018 | 33,87317 |   |     | 7  | 7  | 7  | 46,9 |
| 25,26338 | 22,54016 |   |     | 4  | 4  | 4  | 18,5 |
| 27,91239 | 27,94665 | + | 2_3 | 12 | 12 | 12 | 25,8 |
| 26,32445 | 27,66452 |   |     | 4  | 4  | 4  | 24,1 |
| 28,50994 | 28,98076 |   |     | 11 | 11 | 9  | 25,8 |
| 28,68656 | 28,03889 |   |     | 5  | 5  | 5  | 6,9  |
| 30,83771 | 30,31084 |   |     | 5  | 5  | 5  | 32,7 |
| 21,06007 | 22,18177 |   |     | 2  | 2  | 2  | 17   |
| 27,67283 | 26,34415 |   |     | 10 | 4  | 4  | 43,4 |
| 31,81867 | 31,29975 |   |     | 16 | 16 | 13 | 59,3 |
| 29,81967 | 29,82792 |   |     | 5  | 5  | 5  | 41,9 |
| 24,82182 | 23,49875 |   |     | 5  | 5  | 5  | 4,1  |
| 30,07202 | 30,27487 |   |     | 16 | 16 | 16 | 39,6 |
| 22,25546 | 22,98968 |   |     | 1  | 1  | 1  | 4,9  |
| 27,52447 | 26,34316 | + | 2_3 | 21 | 18 | 18 | 24,7 |
| 27,55772 | 25,58446 |   |     | 23 | 23 | 23 | 8,7  |
| 29,45405 | 30,24762 |   |     | 32 | 32 | 32 | 21,5 |
| 24,94864 | 24,56889 | + | 2_3 | 3  | 3  | 1  | 9,6  |
| 27,70299 | 28,13775 |   |     | 10 | 10 | 10 | 52,9 |
| 28,78176 | 29,24681 | + | 2_3 | 7  | 7  | 7  | 6,7  |
| 25,67694 | 26,49496 | + | 2_3 | 5  | 5  | 5  | 20,7 |
| 23,256   | 22,54659 |   |     | 5  | 5  | 5  | 8,3  |
| 23,00335 | 21,34792 |   |     | 1  | 1  | 1  | 9,6  |
| 28,78924 | 27,59662 | + | 2_3 | 3  | 3  | 3  | 25,7 |
| 24,47914 | 25,04635 |   |     | 7  | 7  | 7  | 4,8  |
| 27,32002 | 22,81877 |   |     | 7  | 7  | 7  | 20,5 |
| 26,27046 | 26,74638 |   |     | 4  | 4  | 4  | 24,1 |
| 28,38718 | 28,44249 |   |     | 8  | 8  | 8  | 15,9 |
| 22,26167 | 24,22538 |   |     | 3  | 3  | 3  | 36,3 |
| 27,73596 | 27,54768 | + | 2_3 | 5  | 5  | 5  | 21   |
| 23,00949 | 22,52667 |   |     | 3  | 3  | 3  | 9,7  |
| 29,14936 | 26,91319 |   |     | 2  | 2  | 2  | 12,4 |
| 28,95333 | 26,63533 |   |     | 10 | 10 | 10 | 29   |
| 22,11832 | 21,33434 |   |     | 5  | 5  | 5  | 13,2 |
| 23,93957 | 25,17268 |   |     | 4  | 4  | 4  | 25,8 |
| 22,14252 | 20,9939  |   |     | 3  | 3  | 3  | 3    |
| 26,73195 | 26,98663 |   |     | 3  | 3  | 3  | 4,5  |
| 22,43952 | 22,41341 |   |     | 2  | 2  | 2  | 21,8 |
| 29,07181 | 30,04101 |   |     | 8  | 8  | 8  | 52,6 |
| 24,93472 | 26,07812 |   |     | 4  | 4  | 4  | 27,7 |
| 34,96456 | 35,41516 |   |     | 5  | 5  | 5  | 43,7 |
| 29,41357 | 29,77698 |   |     | 8  | 8  | 8  | 60,3 |
| 26,50303 | 27,1378  |   |     | 11 | 8  | 7  | 46,6 |
| 28,1601  | 27,92818 |   |     | 15 | 12 | 12 | 54,9 |
| 27,64678 | 27,53942 |   |     | 5  | 5  | 5  | 70,5 |

|          |          |   |     |    |    |    |      |
|----------|----------|---|-----|----|----|----|------|
| 29,54481 | 31,90203 |   |     | 5  | 5  | 5  | 38,8 |
| 24,96899 | 21,43893 |   |     | 7  | 7  | 7  | 53,9 |
| 27,2516  | 28,17016 |   |     | 3  | 3  | 3  | 41,7 |
| 31,04785 | 30,74214 |   |     | 14 | 11 | 9  | 55,5 |
| 31,69387 | 30,24853 |   |     | 17 | 17 | 1  | 61,6 |
| 29,0922  | 28,78609 |   |     | 2  | 2  | 2  | 50   |
| 29,28701 | 29,04679 | + | 2_3 | 7  | 7  | 7  | 17,1 |
| 32,14659 | 31,15158 |   |     | 24 | 24 | 24 | 30,1 |
| 21,26774 | 22,32003 | + | 2_3 | 4  | 4  | 4  | 31,3 |
| 27,65055 | 23,1283  | + | 2_3 | 7  | 5  | 5  | 18,3 |
| 26,42686 | 26,03687 |   |     | 5  | 5  | 5  | 5,7  |
| 28,51273 | 28,56779 |   |     | 4  | 4  | 4  | 21,7 |
| 27,57795 | 29,18182 |   |     | 6  | 6  | 1  | 46,6 |
| 27,09225 | 28,22246 |   |     | 3  | 3  | 3  | 5,5  |
| 29,84894 | 30,19507 |   |     | 26 | 26 | 26 | 14,1 |
| 25,31316 | 25,29635 |   |     | 9  | 9  | 9  | 15,5 |
| 32,44586 | 31,76228 |   |     | 24 | 24 | 22 | 52,5 |
| 31,15672 | 31,89638 |   |     | 20 | 18 | 18 | 35,5 |
| 29,70914 | 30,1343  |   |     | 7  | 7  | 6  | 39,2 |
| 26,46579 | 27,45513 |   |     | 4  | 4  | 4  | 7,2  |
| 27,99394 | 28,1456  |   |     | 10 | 10 | 10 | 11,9 |
| 34,5739  | 34,16121 |   |     | 22 | 22 | 22 | 49,7 |
| 27,55223 | 26,41745 |   |     | 8  | 8  | 8  | 14,8 |
| 28,96058 | 28,41216 | + | 2_3 | 11 | 11 | 11 | 35,6 |
| 32,60213 | 32,57786 |   |     | 16 | 16 | 16 | 58,4 |
| 22,94758 | 26,84122 |   |     | 13 | 13 | 13 | 15,3 |
| 26,62324 | 25,73244 |   |     | 7  | 7  | 7  | 28,2 |
| 27,94559 | 28,32633 |   |     | 10 | 10 | 10 | 18,4 |
| 27,50945 | 21,8165  |   |     | 3  | 3  | 3  | 12,7 |
| 27,4753  | 21,95672 |   |     | 6  | 6  | 6  | 11,3 |
| 31,08087 | 31,5073  |   |     | 44 | 44 | 44 | 56,1 |
| 36,06305 | 35,62631 | + | 2_3 | 61 | 61 | 61 | 61,7 |
| 28,53118 | 27,55538 |   |     | 10 | 10 | 10 | 17,7 |
| 26,15883 | 27,18782 |   |     | 9  | 9  | 9  | 22,3 |
| 32,42542 | 33,33165 |   |     | 8  | 8  | 8  | 34,6 |
| 30,00945 | 29,20506 |   |     | 15 | 15 | 14 | 11,9 |
| 25,21656 | 26,79588 |   |     | 5  | 5  | 5  | 20,4 |
| 21,35252 | 22,27447 |   |     | 15 | 15 | 13 | 3,9  |
| 26,00071 | 26,82784 |   |     | 3  | 3  | 3  | 13,3 |
| 27,75983 | 26,20253 |   |     | 11 | 11 | 11 | 21,4 |
| 31,54209 | 30,68813 |   |     | 22 | 22 | 22 | 41,3 |
| 32,87197 | 32,17173 |   |     | 14 | 14 | 14 | 56,4 |
| 30,22159 | 30,5139  |   |     | 21 | 21 | 21 | 47,2 |
| 25,88159 | 25,53074 |   |     | 7  | 7  | 7  | 20,1 |
| 29,96472 | 30,12312 |   |     | 8  | 8  | 8  | 29,9 |
| 32,42114 | 32,80205 |   |     | 60 | 60 | 60 | 45,6 |
| 26,91547 | 26,26469 |   |     | 9  | 9  | 9  | 13,7 |
| 21,97225 | 24,02431 |   |     | 4  | 4  | 1  | 23,3 |
| 25,49308 | 26,83062 |   |     | 3  | 3  | 3  | 8,4  |
| 27,33151 | 21,88122 |   |     | 4  | 4  | 4  | 10,7 |

|                                                                                                 |          |   |     |     |     |    |      |
|-------------------------------------------------------------------------------------------------|----------|---|-----|-----|-----|----|------|
| 30,30726                                                                                        | 29,43418 | + | 2_3 | 28  | 28  | 28 | 17,4 |
| 26,47011                                                                                        | 27,54532 |   |     | 16  | 16  | 16 | 17,9 |
| 22,41431                                                                                        | 22,69217 |   |     | 5   | 5   | 5  | 11,5 |
| 28,52671                                                                                        | 28,23622 |   |     | 10  | 10  | 10 | 21,5 |
| 30,34742                                                                                        | 29,24407 |   |     | 14  | 14  | 14 | 15,9 |
| 28,11709                                                                                        | 26,58892 |   |     | 13  | 13  | 13 | 20,8 |
| 32,61489                                                                                        | 30,55344 |   |     | 19  | 19  | 19 | 42,2 |
| 22,95408                                                                                        | 22,2762  |   |     | 5   | 5   | 5  | 13,7 |
| 24,72858                                                                                        | 26,61933 |   |     | 5   | 5   | 5  | 25,6 |
| 27,61253                                                                                        | 28,66075 |   |     | 20  | 20  | 20 | 18,2 |
| 29,72728                                                                                        | 30,19507 | + | 2_3 | 9   | 9   | 9  | 29,4 |
| 24,67632                                                                                        | 24,27049 | + | 2_3 | 7   | 7   | 7  | 7,9  |
| 28,45254                                                                                        | 29,0643  |   |     | 17  | 17  | 17 | 14,8 |
| 25,69238                                                                                        | 26,59235 |   |     | 2   | 2   | 2  | 12,5 |
| 26,92411                                                                                        | 23,56164 |   |     | 4   | 4   | 4  | 26,5 |
| 26,54432                                                                                        | 25,27501 |   |     | 5   | 5   | 5  | 16,8 |
| 28,464                                                                                          | 30,06381 |   |     | 46  | 46  | 46 | 21,2 |
| 30,00223                                                                                        | 29,88217 |   |     | 16  | 16  | 16 | 28,4 |
| 22,24566                                                                                        | 23,55415 |   |     | 3   | 3   | 3  | 34,1 |
| 28,83843                                                                                        | 28,87059 |   |     | 7   | 7   | 7  | 37,1 |
| 28,83699                                                                                        | 28,58405 |   |     | 11  | 11  | 11 | 36   |
| 28,34401                                                                                        | 22,16493 |   |     | 4   | 4   | 4  | 74,2 |
| 26,7057                                                                                         | 26,33868 |   |     | 8   | 8   | 8  | 10,1 |
| 22,79165                                                                                        | 25,97412 |   |     | 9   | 9   | 9  | 5,5  |
| 27,25422                                                                                        | 27,97208 |   |     | 18  | 18  | 18 | 27,5 |
| 28,57124                                                                                        | 28,5634  |   |     | 9   | 9   | 9  | 9,7  |
| 30,01492                                                                                        | 30,15846 |   |     | 10  | 10  | 1  | 43,1 |
| 27,71967                                                                                        | 29,03572 |   |     | 4   | 4   | 4  | 15,2 |
| 23,18006                                                                                        | 22,52028 | + | 2_3 | 4   | 4   | 4  | 17,4 |
| 24,1877                                                                                         | 29,62633 |   |     | 10  | 10  | 10 | 7,1  |
| 29,00566                                                                                        | 21,58528 |   |     | 5   | 5   | 5  | 25,6 |
| 26,76497                                                                                        | 27,97405 |   |     | 7   | 7   | 7  | 39,7 |
| 27,5837                                                                                         | 27,0662  |   |     | 10  | 10  | 10 | 16,5 |
| 22,62                                                                                           | 27,64911 |   |     | 8   | 8   | 8  | 11,6 |
| 28,01845                                                                                        | 28,46404 |   |     | 6   | 6   | 6  | 17,9 |
| 38,09501                                                                                        | 37,49905 |   |     | 111 | 111 | 0  | 62,5 |
| 26,64072                                                                                        | 25,56842 |   |     | 6   | 6   | 6  | 34,8 |
| 29,53185                                                                                        | 31,83665 |   |     | 59  | 59  | 1  | 43,7 |
| 33,70913                                                                                        | 33,52402 |   |     | 106 | 106 | 49 | 36,7 |
| 30,96747                                                                                        | 22,67339 |   |     | 3   | 3   | 1  | 20,3 |
| 29,75681                                                                                        | 27,0701  |   |     | 13  | 8   | 0  | 39,6 |
| 29,24266                                                                                        | 26,092   |   |     | 14  | 14  | 0  | 56   |
| ; OX=9606 GN=HLA-A PE=3 SV=1;tr A0A0S4XRM0 A0A0S4XRM0_HUMAN MHC class I antigen OS=Homo sapiens |          |   |     |     |     |    |      |
| 28,1209                                                                                         | 25,79025 |   |     | 2   | 1   | 0  | 12,2 |
| 23,26055                                                                                        | 23,22372 |   |     | 110 | 2   | 0  | 67   |
| 29,61569                                                                                        | 29,87948 |   |     | 18  | 18  | 17 | 36,4 |
| 29,35323                                                                                        | 29,58923 | + | 2_3 | 5   | 5   | 1  | 4,8  |
| 28,84999                                                                                        | 29,16181 |   |     | 6   | 6   | 1  | 50   |
| 28,45846                                                                                        | 28,02797 |   |     | 7   | 7   | 0  | 19,1 |
| 32,39971                                                                                        | 32,94805 |   |     | 82  | 3   | 2  | 86,1 |

|          |          |   |     |    |    |    |      |
|----------|----------|---|-----|----|----|----|------|
| 30,16651 | 29,49446 |   |     | 20 | 20 | 20 | 36,6 |
| 22,94437 | 23,02712 |   |     | 8  | 1  | 1  | 82,7 |
| 30,73651 | 31,21477 |   |     | 11 | 1  | 1  | 57,5 |
| 33,11114 | 32,84277 |   |     | 24 | 24 | 24 | 64,3 |
| 30,15279 | 22,7509  |   |     | 13 | 2  | 0  | 41,5 |
| 28,35001 | 28,34202 |   |     | 3  | 3  | 3  | 27   |
| 29,24386 | 28,63159 | + | 2_3 | 12 | 12 | 12 | 41   |

| Unique + r | Unique sec | Mol. weight | Q-value | Score  | Intensity | MS/MS col | iBAQ 1-1 | iBAQ 1-3 |
|------------|------------|-------------|---------|--------|-----------|-----------|----------|----------|
| 75,3       | 75,3       | 24,409      | 0       | 97,144 | 1,29E+10  | 56        | 72499000 | 1,6E+08  |
| 64,6       | 21,4       | 51,621      | 0       | 323,31 | 2,44E+10  | 173       | 1,75E+08 | 1,43E+08 |
| 31,7       | 6,7        | 58,536      | 0       | 132,71 | 9,64E+09  | 86        | 53050000 | 60895000 |
| 34,5       | 34,5       | 51,267      | 0       | 187,1  | 1,04E+09  | 26        | 589190   | 5860500  |
| 39,6       | 37,7       | 58,826      | 0       | 285,48 | 1,13E+09  | 36        | 7393700  | 413300   |
| 45,3       | 9,3        | 62,378      | 0       | 323,31 | 6,27E+10  | 186       | 4,88E+08 | 2,73E+08 |
| 40,4       | 40,4       | 62,129      | 0       | 323,31 | 1,21E+09  | 33        | 57599    | 1043400  |
| 37,7       | 35,4       | 48,105      | 0       | 292,46 | 3,9E+09   | 76        | 18414000 | 28835000 |
| 28,6       | 28,6       | 11,29       | 0       | 91,897 | 8,87E+08  | 19        | 0        | 100850   |
| 18,8       | 18,8       | 26,793      | 0       | 4,8618 | 17190000  | 16        | 64148    | 44043    |
| 26,5       | 4,4        | 82,577      | 0       | 195,5  | 1,26E+10  | 179       | 54165000 | 12210000 |
| 5,1        | 5,1        | 94,411      | 0       | 5,6156 | 61725000  | 10        | 111380   | 169530   |
| 51,8       | 51,8       | 214,84      | 0       | 323,31 | 1,21E+11  | 873       | 1,62E+08 | 41900000 |
| 18,2       | 5,7        | 32,316      | 0       | 18,095 | 3,54E+08  | 21        | 224290   | 69058    |
| 63,5       | 12,3       | 42,026      | 0       | 299,05 | 6,5E+10   | 215       | 4,69E+08 | 1,99E+08 |
| 5,9        | 5,9        | 57,896      | 0       | 5,1365 | 40824000  | 8         | 31181    | 10329    |
| 12,3       | 12,3       | 19,793      | 0       | 2,4636 | 52130000  | 8         | 452110   | 0        |
| 39,2       | 39,2       | 399,73      | 0       | 323,31 | 6,03E+10  | 783       | 50947000 | 19382000 |
| 22,7       | 1,5        | 58,397      | 0       | 50,188 | 1,25E+09  | 50        | 1198200  | 736720   |
| 33,2       | 33,2       | 104,85      | 0       | 182,3  | 3,99E+09  | 98        | 9785600  | 10522000 |
| 6,2        | 6,2        | 116,43      | 0       | 15,039 | 3,87E+08  | 18        | 871770   | 230690   |
| 39,7       | 39,7       | 13,89       | 0       | 101,98 | 1,68E+10  | 52        | 3,75E+08 | 1,23E+08 |
| 30,8       | 28,4       | 37,371      | 0       | 10,842 | 9,27E+08  | 27        | 8190000  | 9313400  |
| 11,3       | 11,3       | 47,984      | 0       | 2,6777 | 2,77E+09  | 7         | 23685000 | 17189000 |
| 20,3       | 20,3       | 74,823      | 0       | 15,573 | 1,83E+09  | 39        | 3527200  | 1954600  |
| 14,9       | 14,5       | 275,66      | 0       | 134,65 | 2,73E+09  | 111       | 2464100  | 2379800  |
| 29,8       | 29,8       | 41,174      | 0       | 13,75  | 1,99E+09  | 32        | 16969000 | 32253000 |
| 7,4        | 7,4        | 129,83      | 0       | 7,7814 | 3,1E+08   | 11        | 101600   | 915650   |
| 31,7       | 31,7       | 32,212      | 0       | 108,45 | 2,79E+09  | 30        | 31201000 | 18398000 |
| 25,6       | 25,6       | 28,671      | 0       | 92,323 | 4,49E+09  | 38        | 33758000 | 15949000 |
| 43,9       | 0,9        | 108,64      | 0       | 311,9  | 6,94E+10  | 333       | 2,32E+08 | 91592000 |
| 20,9       | 20,9       | 43,059      | 0       | 25,883 | 1,15E+09  | 14        | 25800000 | 0        |
| 18,4       | 18,4       | 30,497      | 0       | 31,254 | 6,3E+08   | 30        | 964530   | 11473000 |
| 43         | 43         | 24,96       | 0       | 187,45 | 4,25E+09  | 58        | 64130000 | 10672000 |
| 51,5       | 47,9       | 36,688      | 0       | 145,06 | 8,98E+09  | 81        | 89583000 | 18618000 |
| 10,8       | 10,8       | 41,326      | 0       | 4,3518 | 1,84E+08  | 10        | 126200   | 949770   |
| 12,3       | 12,3       | 41,428      | 0       | 9,2444 | 3,64E+08  | 10        | 1428400  | 864140   |
| 14,8       | 14,8       | 62,965      | 0       | 23,956 | 6,21E+08  | 21        | 0        | 0        |
| 21,6       | 20,5       | 187,15      | 0       | 220,13 | 1,57E+09  | 99        | 227840   | 107200   |
| 83,2       | 83,2       | 16,057      | 0       | 60,299 | 2,01E+10  | 126       | 3,41E+08 | 2,58E+08 |
| 50,7       | 50,7       | 15,799      | 0       | 135,39 | 9,29E+09  | 132       | 2,94E+08 | 1,11E+08 |
| 15,4       | 15,4       | 104,75      | 0       | 92,771 | 4,66E+09  | 75        | 14286000 | 13547000 |
| 29,8       | 29,8       | 10,16       | 0       | 89,507 | 5,61E+10  | 478       | 2,06E+09 | 40180000 |
| 30,8       | 30,8       | 11,765      | 0       | 10,41  | 66256000  | 18        | 1266400  | 2177600  |
| 11         | 11         | 53,224      | 0       | 6,1669 | 4,54E+08  | 15        | 5082400  | 3095100  |
| 17         | 17         | 25,331      | 0       | 251,01 | 1,1E+09   | 30        | 26111000 | 1344800  |
| 24,1       | 24,1       | 74,139      | 0       | 55,115 | 3,22E+09  | 79        | 35741000 | 5348700  |
| 46,7       | 15,5       | 36,154      | 0       | 269,99 | 1,65E+10  | 146       | 97461000 | 12038000 |

|      |      |        |   |        |          |      |          |          |
|------|------|--------|---|--------|----------|------|----------|----------|
| 1,4  | 0    | 272,32 | 0 | 52,354 | 1,58E+08 | 36   | 81907    | 203620   |
| 6,3  | 6,3  | 38,797 | 0 | 15,898 | 31980000 | 11   | 288510   | 0        |
| 86,4 | 2,7  | 77,063 | 0 | 323,31 | 8,7E+12  | 4262 | 2,62E+10 | 2,22E+10 |
| 29,7 | 29,7 | 51,676 | 0 | 36,438 | 3,51E+09 | 51   | 15293000 | 6793500  |
| 42   | 42   | 53,981 | 0 | 323,31 | 6,47E+10 | 186  | 1,07E+09 | 1,67E+08 |
| 34,2 | 30,9 | 45,26  | 0 | 52,492 | 5,88E+09 | 63   | 32043000 | 18202000 |
| 58,2 | 58,2 | 11,139 | 0 | 13,186 | 1,18E+08 | 12   | 655760   | 8601400  |
| 29,2 | 29,2 | 38,714 | 0 | 13,819 | 6,39E+08 | 30   | 4519500  | 649710   |
| 28,4 | 28,4 | 30,768 | 0 | 62,195 | 1,06E+09 | 39   | 11794000 | 6004700  |
| 32,6 | 24,5 | 66,11  | 0 | 323,31 | 4,02E+09 | 57   | 10021000 | 6480000  |
| 37,3 | 37,3 | 27,87  | 0 | 38,935 | 2,62E+09 | 45   | 63316    | 23093000 |
| 20,6 | 20,6 | 18,552 | 0 | 10,841 | 1,58E+09 | 19   | 62550000 | 14557000 |
| 47,5 | 46,3 | 84,818 | 0 | 323,31 | 2,7E+11  | 562  | 9,95E+08 | 4,66E+08 |
| 39,8 | 39,8 | 10,834 | 0 | 13,423 | 3,12E+09 | 30   | 32816000 | 61618000 |
| 39   | 39   | 46,611 | 0 | 119,95 | 1,95E+09 | 76   | 3136400  | 373360   |
| 39,6 | 39,6 | 45,059 | 0 | 127,92 | 2,24E+10 | 127  | 2,23E+08 | 20886000 |
| 15,6 | 15,6 | 49,757 | 0 | 14,252 | 1,03E+08 | 14   | 0        | 319500   |
| 37,4 | 37,4 | 11,665 | 0 | 5,8479 | 1,88E+08 | 16   | 4794900  | 1871800  |
| 10,9 | 10,9 | 88,414 | 0 | 13,238 | 7,89E+08 | 24   | 4905700  | 1217500  |
| 14,5 | 14,5 | 85,696 | 0 | 32,006 | 1,57E+09 | 42   | 6595000  | 2566100  |
| 44,7 | 44,7 | 13,21  | 0 | 24,415 | 1,31E+09 | 48   | 10455000 | 24562000 |
| 45,9 | 45,9 | 9,681  | 0 | 50,598 | 4,66E+10 | 33   | 1,25E+09 | 8,32E+08 |
| 51,6 | 51,6 | 47,168 | 0 | 201,88 | 1,16E+10 | 125  | 1,5E+08  | 13146000 |
| 15,4 | 15,4 | 67,285 | 0 | 236,24 | 2,66E+08 | 39   | 889080   | 2386100  |
| 27,9 | 27,9 | 29,464 | 0 | 87,992 | 4,77E+09 | 67   | 94962000 | 39584000 |
| 21,1 | 12,1 | 28,955 | 0 | 12,282 | 3,05E+09 | 20   | 2358100  | 0        |
| 40,7 | 40,7 | 37,157 | 0 | 219,27 | 6,22E+09 | 74   | 12932000 | 69736    |
| 35,8 | 35,8 | 37,294 | 0 | 196,48 | 6,44E+09 | 90   | 1,13E+08 | 60047000 |
| 39,8 | 39,8 | 57,116 | 0 | 185,88 | 1,13E+10 | 159  | 65829000 | 24810000 |
| 30,1 | 30,1 | 44,552 | 0 | 30,727 | 1,61E+09 | 49   | 25298000 | 13145000 |
| 65,2 | 65,2 | 38,604 | 0 | 316,74 | 1,02E+10 | 128  | 92081000 | 17935000 |
| 43,9 | 43,9 | 58,14  | 0 | 218,1  | 1,81E+10 | 133  | 84055000 | 39637000 |
| 16,9 | 16,9 | 25,5   | 0 | 7,43   | 6,56E+08 | 24   | 16929000 | 2931000  |
| 82,1 | 82,1 | 15,054 | 0 | 86,434 | 1,37E+10 | 72   | 3,27E+08 | 61809000 |
| 42,5 | 42,5 | 37,821 | 0 | 195,99 | 8,29E+09 | 87   | 32655000 | 78236000 |
| 36,5 | 36,5 | 198,04 | 0 | 323,31 | 3,76E+10 | 518  | 70880000 | 25573000 |
| 67,9 | 2,2  | 129,38 | 0 | 323,31 | 7,85E+11 | 1688 | 1,87E+09 | 1,15E+09 |
| 24,7 | 13,1 | 83,263 | 0 | 65,326 | 2,62E+09 | 73   | 9861500  | 1149200  |
| 54,9 | 54,9 | 47,472 | 0 | 221,05 | 2,57E+10 | 201  | 56633000 | 29258000 |
| 10   | 10   | 167,55 | 0 | 175,05 | 3,33E+09 | 86   | 10641000 | 1712800  |
| 7,7  | 7,7  | 157,71 | 0 | 17,316 | 1,41E+09 | 56   | 1046700  | 500800   |
| 15   | 13,1 | 53,683 | 0 | 6,8444 | 1,57E+08 | 12   | 1028000  | 0        |
| 36,2 | 36,2 | 35,936 | 0 | 24,174 | 3,46E+09 | 64   | 22675000 | 15380000 |
| 25,9 | 25,9 | 19,48  | 0 | 14,533 | 1,6E+08  | 25   | 286380   | 1611900  |
| 45,8 | 45,8 | 11,301 | 0 | 50,679 | 9,18E+08 | 36   | 4136500  | 37048    |
| 60   | 60   | 14,716 | 0 | 91,859 | 5,69E+09 | 40   | 35649000 | 3951300  |
| 49,5 | 49,5 | 34,632 | 0 | 110,35 | 2,06E+10 | 148  | 2,45E+08 | 1,22E+08 |
| 15   | 15   | 57,519 | 0 | 7,4178 | 1,92E+08 | 16   | 0        | 0        |
| 61   | 61   | 147,33 | 0 | 9,749  | 7,98E+08 | 21   | 1586300  | 116090   |
| 9,1  | 9,1  | 30,992 | 0 | 2,8125 | 71957000 | 14   | 1216100  | 501650   |

|      |      |        |   |        |          |     |          |          |
|------|------|--------|---|--------|----------|-----|----------|----------|
| 12,6 | 7,6  | 70,108 | 0 | 24,943 | 1,03E+08 | 17  | 95421    | 130300   |
| 57,7 | 57,7 | 16,837 | 0 | 49,202 | 2,96E+09 | 42  | 13041000 | 35847000 |
| 20,2 | 20,2 | 211,68 | 0 | 110,05 | 4,69E+09 | 150 | 12781000 | 5521300  |
| 32,4 | 32,4 | 11,737 | 0 | 9,2184 | 2,13E+09 | 33  | 78400000 | 39687000 |
| 45   | 45   | 72,332 | 0 | 232,6  | 1,97E+10 | 192 | 81451000 | 57684000 |
| 48,3 | 48,3 | 174,01 | 0 | 323,31 | 4,34E+10 | 395 | 81565000 | 25649000 |
| 28,5 | 24,3 | 70,897 | 0 | 95,29  | 6,82E+09 | 84  | 58448000 | 3691400  |
| 11,1 | 11,1 | 108,34 | 0 | 106,17 | 1,71E+09 | 49  | 3170500  | 255080   |
| 45,9 | 36,7 | 103,06 | 0 | 246,79 | 2,14E+10 | 294 | 60622000 | 45274000 |
| 17,3 | 17,3 | 83,822 | 0 | 53,973 | 1,36E+09 | 74  | 7130600  | 2397500  |
| 10,4 | 10,4 | 25,673 | 0 | 46,705 | 2,25E+09 | 21  | 19435000 | 8106900  |
| 15,2 | 15,2 | 95,337 | 0 | 17,914 | 4,32E+08 | 31  | 1411300  | 452630   |
| 23,4 | 23,4 | 72,932 | 0 | 26,028 | 2,34E+09 | 43  | 7107400  | 7619200  |
| 25,6 | 25,6 | 18,108 | 0 | 3,2074 | 9,67E+08 | 8   | 31137000 | 2594300  |
| 10,7 | 8,6  | 70,289 | 0 | 49,458 | 1,44E+08 | 16  | 321640   | 435020   |
| 36,9 | 36,9 | 14,529 | 0 | 11,593 | 2,24E+09 | 36  | 48669000 | 23314000 |
| 8,2  | 8,2  | 15,523 | 0 | 7,339  | 8,77E+08 | 12  | 7983200  | 0        |
| 18   | 18   | 122,02 | 0 | 73,637 | 2,05E+09 | 74  | 2874900  | 72081    |
| 16   | 16   | 57,936 | 0 | 6,1243 | 6,01E+08 | 19  | 733900   | 0        |
| 22,1 | 7,7  | 92,339 | 0 | 47,732 | 2,33E+09 | 52  | 16121000 | 2518100  |
| 15,5 | 15,5 | 39,579 | 0 | 23,514 | 2,55E+09 | 7   | 33801000 | 165960   |
| 26,9 | 26,9 | 16,729 | 0 | 13,145 | 12704000 | 11  | 100530   | 0        |
| 6,1  | 6,1  | 65,568 | 0 | 4,645  | 1,59E+08 | 11  | 27737    | 28526    |
| 24,2 | 24,2 | 27,895 | 0 | 127,02 | 1,66E+09 | 84  | 17222000 | 5135500  |
| 35,2 | 35,2 | 20,195 | 0 | 36,023 | 2,77E+08 | 23  | 1245600  | 1639600  |
| 6,6  | 6,6  | 81,537 | 0 | 11,376 | 1,74E+10 | 43  | 72686000 | 63612000 |
| 17,7 | 17,7 | 106,78 | 0 | 51,324 | 1,47E+09 | 59  | 6993100  | 634840   |
| 51,3 | 51,3 | 20,838 | 0 | 120,62 | 2,01E+09 | 73  | 40160000 | 12528000 |
| 9,4  | 9,4  | 116,74 | 0 | 15,067 | 1,84E+08 | 21  | 7116,7   | 45561    |
| 26   | 26   | 28,804 | 0 | 45,273 | 6E+08    | 26  | 0        | 6306000  |
| 65,3 | 65,3 | 34,803 | 0 | 323,31 | 6,47E+10 | 239 | 6,73E+08 | 2,1E+08  |
| 21,4 | 21,4 | 12,269 | 0 | 4,7231 | 1,89E+08 | 9   | 0        | 0        |
| 20   | 20   | 23,787 | 0 | 40,708 | 6,22E+08 | 10  | 4803700  | 388220   |
| 15   | 15   | 277,5  | 0 | 47,411 | 1,13E+09 | 69  | 869610   | 274400   |
| 53,4 | 53,4 | 14,374 | 0 | 29,647 | 1E+10    | 38  | 95637000 | 32647000 |
| 17,7 | 17,7 | 41,654 | 0 | 53,085 | 1,64E+09 | 15  | 12191000 | 0        |
| 29,8 | 29,8 | 15,906 | 0 | 38,944 | 3,47E+08 | 25  | 3365700  | 2167200  |
| 13,5 | 13,5 | 86,551 | 0 | 43,375 | 7,7E+08  | 41  | 4116200  | 399030   |
| 31,8 | 6,4  | 30,137 | 0 | 19,122 | 4,56E+09 | 37  | 53133000 | 44254000 |
| 70,8 | 46,1 | 9,8875 | 0 | 57,927 | 9,4E+09  | 36  | 1,37E+08 | 5,28E+08 |
| 23,6 | 23,6 | 27,934 | 0 | 72,268 | 3,57E+09 | 35  | 77047000 | 360870   |
| 30,9 | 8,7  | 70,154 | 0 | 67,45  | 7,24E+09 | 83  | 33291000 | 12880000 |
| 19,5 | 19,5 | 119,09 | 0 | 76,539 | 1,35E+09 | 63  | 3356300  | 677960   |
| 33,2 | 33,2 | 22,742 | 0 | 40,946 | 9,11E+09 | 63  | 1,15E+08 | 48321000 |
| 38,2 | 38,2 | 22,728 | 0 | 84,366 | 8,11E+08 | 41  | 1048000  | 659540   |
| 1    | 0    | 240,85 | 0 | 8,211  | 1,33E+08 | 13  | 97468    | 160780   |
| 5,9  | 5,9  | 337,08 | 0 | 41,513 | 1,03E+09 | 34  | 237820   | 160850   |
| 21,4 | 21,4 | 27,647 | 0 | 6,5667 | 4,4E+08  | 13  | 182900   | 13376000 |
| 26,8 | 26,8 | 21,364 | 0 | 4,6214 | 75850000 | 12  | 285670   | 217270   |
| 2,7  | 2,7  | 81,996 | 0 | 4,2977 | 5,09E+08 | 7   | 1133600  | 804460   |



|      |      |        |          |        |          |     |          |          |
|------|------|--------|----------|--------|----------|-----|----------|----------|
| 19,1 | 19,1 | 67,819 | 0        | 20,715 | 1,83E+09 | 28  | 673190   | 378960   |
| 56,2 | 56,2 | 46,918 | 0        | 154,86 | 3,41E+10 | 164 | 2,46E+08 | 1,94E+08 |
| 14,1 | 14,1 | 45,421 | 0        | 6,8391 | 2,13E+08 | 8   | 9112400  | 44635    |
| 12   | 12   | 26,425 | 0        | 6,001  | 47823000 | 6   | 1015500  | 284770   |
| 46,5 | 46,5 | 63,544 | 0        | 263,9  | 5,14E+10 | 181 | 3,42E+08 | 1,85E+08 |
| 46,9 | 46,9 | 11,117 | 0        | 49,284 | 1,11E+11 | 70  | 3,71E+09 | 2,29E+09 |
| 18,5 | 18,5 | 54,305 | 0        | 10,937 | 2,61E+08 | 8   | 1329200  | 457450   |
| 25,8 | 25,8 | 67,877 | 0        | 41,025 | 2,24E+09 | 49  | 10391000 | 13131000 |
| 24,1 | 24,1 | 21,057 | 0        | 7,7377 | 9,21E+08 | 21  | 15632000 | 7729400  |
| 25,8 | 21   | 54,102 | 0        | 37,765 | 2,89E+09 | 64  | 18071000 | 5014800  |
| 6,9  | 6,9  | 98,336 | 0        | 57,528 | 1,7E+09  | 18  | 2439600  | 936830   |
| 32,7 | 32,7 | 16,545 | 0        | 83,634 | 1,09E+10 | 41  | 1,97E+08 | 29201000 |
| 17   | 17   | 16,849 | 0        | 3,6318 | 22655000 | 11  | 1840300  | 106640   |
| 25,4 | 25,4 | 27,85  | 0        | 49,181 | 1,03E+09 | 25  | 3581700  | 677050   |
| 59,3 | 49,2 | 27,774 | 0        | 215,13 | 2,23E+10 | 164 | 1,68E+08 | 80143000 |
| 41,9 | 41,9 | 11,74  | 0        | 13,605 | 5,67E+09 | 49  | 1,68E+08 | 58536000 |
| 4,1  | 4,1  | 138,91 | 0        | 11,174 | 99376000 | 11  | 709760   | 0        |
| 39,6 | 39,6 | 61,68  | 0        | 48,744 | 7,68E+09 | 132 | 35864000 | 11411000 |
| 4,9  | 4,9  | 53,119 | 0,007813 | 1,5315 | 1,76E+10 | 10  | 87305000 | 1,11E+08 |
| 21,6 | 21,6 | 129,99 | 0        | 141,34 | 4,38E+09 | 75  | 12295000 | 1243100  |
| 8,7  | 8,7  | 314,77 | 0        | 58,895 | 2,49E+09 | 80  | 3768900  | 1025300  |
| 21,5 | 21,5 | 226,53 | 0        | 277,72 | 6,5E+09  | 134 | 8367300  | 11191000 |
| 9,6  | 4,5  | 42,1   | 0        | 23,912 | 3,13E+08 | 26  | 2549200  | 869580   |
| 52,9 | 52,9 | 21,086 | 0        | 46,253 | 1,65E+09 | 55  | 15973000 | 17529000 |
| 6,7  | 6,7  | 135,51 | 0        | 79,196 | 2,89E+09 | 58  | 9983300  | 823220   |
| 20,7 | 20,7 | 36,426 | 0        | 23,244 | 7,43E+08 | 26  | 11018000 | 8268400  |
| 8,3  | 8,3  | 107,54 | 0        | 9,187  | 50587000 | 16  | 75691    | 163590   |
| 9,6  | 9,6  | 29,295 | 0        | 13,229 | 36130000 | 13  | 194420   | 82660    |
| 25,7 | 25,7 | 19,365 | 0        | 17,92  | 1,25E+09 | 12  | 0        | 0        |
| 4,8  | 4,8  | 273,42 | 0        | 11,931 | 2,09E+08 | 14  | 370200   | 158520   |
| 20,5 | 20,5 | 46,943 | 0        | 62,298 | 1,45E+09 | 20  | 8382800  | 14420    |
| 24,1 | 24,1 | 23,115 | 0        | 7,4712 | 6,13E+08 | 21  | 2225700  | 934220   |
| 15,9 | 15,9 | 67,404 | 0        | 49,821 | 2,18E+09 | 33  | 1943300  | 9855400  |
| 36,3 | 36,3 | 21,517 | 0        | 13,334 | 80023000 | 20  | 383350   | 290690   |
| 21   | 21   | 36,923 | 0        | 31,222 | 1,28E+09 | 33  | 9219400  | 3546100  |
| 9,7  | 9,7  | 51,853 | 0        | 5,2514 | 3,99E+08 | 5   | 9752800  | 3496400  |
| 12,4 | 12,4 | 17,444 | 0        | 51,051 | 4,71E+09 | 38  | 3,59E+08 | 28579000 |
| 29   | 29   | 54,739 | 0        | 63,493 | 2,43E+09 | 78  | 5752400  | 150420   |
| 13,2 | 13,2 | 71,065 | 0        | 7,7924 | 36665000 | 13  | 55056    | 100110   |
| 25,8 | 25,8 | 20,7   | 0        | 11,647 | 2,9E+08  | 17  | 7189200  | 2780300  |
| 3    | 3    | 195,98 | 0        | 5,6753 | 24215000 | 19  | 14529    | 2561,9   |
| 4,5  | 4,5  | 73,786 | 0        | 5,2505 | 1,18E+09 | 11  | 8541600  | 2047500  |
| 21,8 | 21,8 | 17,963 | 0        | 22,148 | 32376000 | 13  | 358710   | 233820   |
| 52,6 | 52,6 | 22,871 | 0        | 233,96 | 6,11E+09 | 70  | 47126000 | 43673000 |
| 27,7 | 27,7 | 16,645 | 0        | 6,3143 | 3,04E+08 | 10  | 933470   | 744580   |
| 43,7 | 43,7 | 13,714 | 0        | 140,96 | 2,01E+11 | 100 | 2,73E+09 | 7,9E+08  |
| 60,3 | 60,3 | 16,584 | 0        | 157,16 | 5,94E+09 | 75  | 1,54E+08 | 91582000 |
| 40,5 | 36,8 | 28,302 | 0        | 93,449 | 9,49E+08 | 45  | 4728000  | 1208100  |
| 49   | 49   | 29,174 | 0        | 81,485 | 2,29E+09 | 60  | 23407000 | 7546000  |
| 70,5 | 70,5 | 5,0526 | 0        | 70,109 | 1,73E+09 | 26  | 2,51E+08 | 25921000 |

|      |      |        |   |        |          |     |          |          |
|------|------|--------|---|--------|----------|-----|----------|----------|
| 38,8 | 38,8 | 11,314 | 0 | 44,884 | 1,23E+10 | 45  | 5,87E+08 | 2,47E+08 |
| 53,9 | 53,9 | 18,012 | 0 | 26,594 | 1,78E+08 | 42  | 989130   | 664610   |
| 41,7 | 41,7 | 11,951 | 0 | 14,532 | 1,37E+09 | 28  | 6076500  | 18143000 |
| 49,4 | 45,3 | 27,745 | 0 | 106,42 | 1,49E+10 | 87  | 74083000 | 51614000 |
| 61,6 | 5,1  | 37,348 | 0 | 122,74 | 1,67E+10 | 148 | 95256000 | 42202000 |
| 50   | 50   | 5,0256 | 0 | 14,666 | 4,96E+09 | 9   | 3,79E+08 | 62006000 |
| 17,1 | 17,1 | 55,394 | 0 | 28,686 | 3,58E+09 | 38  | 14707000 | 10814000 |
| 30,1 | 30,1 | 133,8  | 0 | 279,35 | 2,58E+10 | 168 | 73337000 | 29399000 |
| 31,3 | 31,3 | 22,588 | 0 | 13,402 | 44157000 | 17  | 369740   | 405650   |
| 16   | 16   | 40,368 | 0 | 40,17  | 7,29E+08 | 18  | 1903000  | 277100   |
| 5,7  | 5,7  | 126,51 | 0 | 24,245 | 7,95E+08 | 20  | 2787600  | 188930   |
| 21,7 | 21,7 | 38,006 | 0 | 39,377 | 3,04E+09 | 49  | 23799000 | 7785700  |
| 46,6 | 13,2 | 19,202 | 0 | 84,558 | 3,47E+09 | 35  | 37246000 | 61871000 |
| 5,5  | 5,5  | 70,169 | 0 | 9,1631 | 8,52E+08 | 16  | 1516000  | 725840   |
| 14,1 | 14,1 | 295,22 | 0 | 323,31 | 7,67E+09 | 103 | 6780300  | 10068000 |
| 15,5 | 15,5 | 79,398 | 0 | 10,877 | 3,16E+08 | 11  | 2991600  | 274270   |
| 52,5 | 50,8 | 53,879 | 0 | 323,31 | 3,09E+10 | 218 | 1,29E+08 | 17027000 |
| 34,2 | 34,2 | 81,979 | 0 | 323,31 | 2,81E+10 | 245 | 1,37E+08 | 43015000 |
| 39,2 | 35,7 | 22,11  | 0 | 48,825 | 8,22E+09 | 59  | 46930000 | 57910000 |
| 7,2  | 7,2  | 96,792 | 0 | 74,085 | 1,2E+09  | 34  | 3371300  | 3494100  |
| 11,9 | 11,9 | 101,8  | 0 | 46,993 | 2,02E+09 | 27  | 4384600  | 2244400  |
| 49,7 | 49,7 | 65,33  | 0 | 323,31 | 1,23E+11 | 243 | 2E+08    | 59886000 |
| 14,8 | 14,8 | 60,793 | 0 | 53,174 | 9,6E+08  | 35  | 5597000  | 25649    |
| 35,6 | 35,6 | 46,231 | 0 | 107,1  | 4,97E+09 | 88  | 27149000 | 12938000 |
| 58,4 | 58,4 | 34,985 | 0 | 175,99 | 3,66E+10 | 166 | 1,12E+08 | 53009000 |
| 15,3 | 15,3 | 111,87 | 0 | 40,253 | 1,86E+09 | 33  | 9239900  | 5783600  |
| 28,2 | 28,2 | 43,078 | 0 | 21,772 | 1,42E+09 | 34  | 22682000 | 318850   |
| 18,4 | 18,4 | 84,364 | 0 | 71,859 | 1,91E+09 | 53  | 989460   | 1780200  |
| 12,7 | 12,7 | 36,728 | 0 | 2,525  | 3,23E+08 | 7   | 0        | 0        |
| 11,3 | 11,3 | 69,323 | 0 | 14,499 | 1,31E+09 | 16  | 10780000 | 1747700  |
| 56,1 | 56,1 | 129,57 | 0 | 323,31 | 2,13E+10 | 348 | 41793000 | 53764000 |
| 61,7 | 61,7 | 130,97 | 0 | 323,31 | 3,73E+11 | 747 | 9,16E+08 | 3,04E+08 |
| 17,7 | 17,7 | 97,539 | 0 | 105,58 | 1,73E+09 | 58  | 3312800  | 1348600  |
| 22,3 | 22,3 | 59,589 | 0 | 24,957 | 9,8E+08  | 49  | 6123200  | 2927000  |
| 34,6 | 34,6 | 26,264 | 0 | 210,73 | 6,09E+10 | 166 | 1,24E+09 | 3,29E+08 |
| 11,9 | 11,5 | 189,24 | 0 | 122,13 | 4,78E+09 | 82  | 6085800  | 1337000  |
| 20,4 | 20,4 | 47,837 | 0 | 23,371 | 5,8E+08  | 25  | 6615500  | 2035400  |
| 3,9  | 3,3  | 512,6  | 0 | 16,414 | 2,28E+08 | 24  | 145970   | 34076    |
| 13,3 | 13,3 | 26,697 | 0 | 4,324  | 8,07E+08 | 15  | 12477000 | 4058600  |
| 21,4 | 21,4 | 83,073 | 0 | 78,704 | 1,26E+09 | 62  | 440140   | 182870   |
| 41,3 | 41,3 | 74,68  | 0 | 323,31 | 3,07E+10 | 260 | 2,4E+08  | 1,12E+08 |
| 56,4 | 56,4 | 29,13  | 0 | 309,45 | 4,96E+10 | 175 | 3,44E+08 | 2,37E+08 |
| 47,2 | 47,2 | 60,673 | 0 | 221,31 | 9,75E+09 | 204 | 33085000 | 11616000 |
| 20,1 | 20,1 | 52,276 | 0 | 16,912 | 4,77E+08 | 33  | 3097400  | 2109200  |
| 29,9 | 29,9 | 40,876 | 0 | 39,226 | 6,46E+09 | 63  | 26180000 | 6088600  |
| 45,6 | 45,6 | 190,46 | 0 | 323,31 | 5,7E+10  | 534 | 63105000 | 70025000 |
| 13,7 | 13,7 | 110,11 | 0 | 57,344 | 1,24E+09 | 31  | 4179400  | 1404600  |
| 23,3 | 9,3  | 30,492 | 0 | 9,3771 | 37428000 | 6   | 520210   | 371950   |
| 8,4  | 8,4  | 37,106 | 0 | 3,1167 | 4,69E+08 | 15  | 1428400  | 0        |
| 10,7 | 10,7 | 43,235 | 0 | 7,9497 | 7,18E+08 | 19  | 0        | 0        |

|      |      |        |   |        |          |      |          |          |
|------|------|--------|---|--------|----------|------|----------|----------|
| 17,4 | 17,4 | 250,53 | 0 | 117,47 | 4,52E+09 | 135  | 9374900  | 102170   |
| 17,9 | 17,9 | 159,69 | 0 | 141,77 | 1,87E+09 | 82   | 3631400  | 4628600  |
| 11,5 | 11,5 | 57,929 | 0 | 5,5525 | 49544000 | 11   | 61890    | 0        |
| 21,5 | 21,5 | 54,498 | 0 | 43,512 | 2,24E+09 | 50   | 6513900  | 610540   |
| 15,9 | 15,9 | 130,93 | 0 | 106,13 | 6,76E+09 | 78   | 13404000 | 2328500  |
| 20,8 | 20,8 | 100,16 | 0 | 110,82 | 1,7E+09  | 35   | 13206000 | 3207300  |
| 42,2 | 42,2 | 74,285 | 0 | 323,31 | 3,73E+10 | 210  | 2,28E+08 | 45913000 |
| 13,7 | 13,7 | 71,819 | 0 | 21,691 | 49831000 | 18   | 57178    | 43985    |
| 25,6 | 25,6 | 24,68  | 0 | 25,144 | 4E+08    | 41   | 2347200  | 5327500  |
| 18,2 | 18,2 | 165,27 | 0 | 139,2  | 2,04E+09 | 84   | 6033500  | 3353800  |
| 29,4 | 29,4 | 51,286 | 0 | 275,36 | 6,29E+09 | 60   | 36163000 | 13834000 |
| 7,9  | 7,9  | 144,37 | 0 | 15,203 | 91054000 | 25   | 40472    | 2135,8   |
| 14,8 | 14,8 | 134,55 | 0 | 37,994 | 3,02E+09 | 58   | 6407300  | 1396500  |
| 12,5 | 12,5 | 16,003 | 0 | 10,168 | 6,84E+08 | 16   | 13945000 | 14251000 |
| 26,5 | 26,5 | 19,891 | 0 | 1,9773 | 6,06E+08 | 7    | 14385000 | 10464000 |
| 16,8 | 16,8 | 47,071 | 0 | 40,784 | 6,02E+08 | 30   | 15576000 | 1127500  |
| 21,2 | 21,2 | 324,57 | 0 | 114,5  | 6,01E+09 | 170  | 7573900  | 8479800  |
| 28,4 | 28,4 | 85,206 | 0 | 183,26 | 6,39E+09 | 115  | 11127000 | 2828300  |
| 34,1 | 34,1 | 13,941 | 0 | 7,3546 | 98880000 | 17   | 457540   | 529600   |
| 37,1 | 37,1 | 23,031 | 0 | 11,535 | 3,44E+09 | 24   | 4439100  | 2042900  |
| 36   | 36   | 48,807 | 0 | 65,254 | 3,1E+09  | 74   | 7718800  | 1785000  |
| 74,2 | 74,2 | 10,438 | 0 | 14,13  | 2,16E+09 | 22   | 72547000 | 26657000 |
| 10,1 | 10,1 | 81,975 | 0 | 48,042 | 7,82E+08 | 23   | 2081800  | 55795    |
| 5,5  | 5,5  | 281,52 | 0 | 15,522 | 3,09E+08 | 20   | 131140   | 794250   |
| 27,5 | 27,5 | 83,432 | 0 | 92,302 | 2,46E+09 | 69   | 8607800  | 13751000 |
| 9,7  | 9,7  | 98,555 | 0 | 24,87  | 2,07E+09 | 43   | 859650   | 4680400  |
| 43,1 | 2,6  | 38,39  | 0 | 226,3  | 7,48E+09 | 127  | 29603000 | 7991300  |
| 15,2 | 15,2 | 33,868 | 0 | 70,212 | 3,58E+09 | 24   | 81727000 | 33833000 |
| 17,4 | 17,4 | 35,634 | 0 | 13,115 | 2,33E+08 | 21   | 4258900  | 6014000  |
| 7,1  | 7,1  | 142,34 | 0 | 72,862 | 4,15E+09 | 33   | 11716000 | 2358300  |
| 25,6 | 25,6 | 26,671 | 0 | 139,34 | 3,39E+09 | 29   | 21554000 | 25555000 |
| 39,7 | 39,7 | 24,341 | 0 | 52,488 | 1,61E+09 | 32   | 28141000 | 33562000 |
| 16,5 | 16,5 | 81,196 | 0 | 89,655 | 1,64E+09 | 33   | 20461000 | 2345900  |
| 11,6 | 11,6 | 94,75  | 0 | 31,508 | 7,01E+08 | 23   | 688780   | 5539500  |
| 17,9 | 17,9 | 32,227 | 0 | 5,4462 | 2,75E+09 | 22   | 10291000 | 41498000 |
| 62,5 | 0    | 259,21 | 0 | 323,31 | 2,36E+12 | 2794 | 2,17E+09 | 2,96E+09 |
| 34,8 | 34,8 | 24,093 | 0 | 11,912 | 6,03E+08 | 32   | 722330   | 1656600  |
| 43,7 | 0,5  | 240,91 | 0 | 323,31 | 1,33E+10 | 363  | 12119000 | 10214000 |
| 36,7 | 16,3 | 464,01 | 0 | 323,31 | 9,26E+10 | 944  | 64082000 | 28890000 |
| 20,3 | 11,6 | 14,813 | 0 | 41,996 | 6,83E+09 | 16   | 22583000 | 0        |
| 26,5 | 0    | 40,853 | 0 | 43,39  | 2,7E+09  | 34   | 0        | 0        |
| 56   | 0    | 31,468 | 0 | 94,489 | 2,75E+09 | 51   | 10619000 | 40222    |

omo sapiens OX=9606 GN=HLA-A PE=3 SV=1;tr|A0A0U5PUM0|A0A0U5PUM0\_HUMAN MHC class I a

|      |     |        |   |        |          |     |          |          |
|------|-----|--------|---|--------|----------|-----|----------|----------|
| 6,1  | 0   | 21,216 | 0 | 6,2742 | 8,31E+08 | 8   | 3560700  | 839600   |
| 1,8  | 0   | 239,62 | 0 | 3,6111 | 1,24E+08 | 16  | 129590   | 219870   |
| 36,4 | 35  | 76,613 | 0 | 102,9  | 6,63E+09 | 108 | 572730   | 319880   |
| 4,8  | 1,2 | 99,978 | 0 | 22,836 | 6,46E+09 | 38  | 29561000 | 133310   |
| 50   | 9,6 | 17,471 | 0 | 26,583 | 4,16E+09 | 55  | 57192000 | 20338000 |
| 19,1 | 0   | 61,94  | 0 | 17,079 | 2,9E+09  | 37  | 21728000 | 24443000 |
| 4,7  | 1,9 | 74,831 | 0 | 323,31 | 6,66E+10 | 267 | 2,63E+08 | 1,09E+08 |

|      |      |        |   |        |          |     |          |          |
|------|------|--------|---|--------|----------|-----|----------|----------|
| 36,6 | 36,6 | 71,553 | 0 | 77,483 | 8E+09    | 128 | 71519000 | 22670000 |
| 20   | 20   | 7,99   | 0 | 16,266 | 6,66E+08 | 6   | 29338000 | 18754000 |
| 7,5  | 7,5  | 14,691 | 0 | 25,049 | 1,19E+10 | 30  | 2,77E+08 | 2,32E+08 |
| 64,3 | 64,3 | 46,924 | 0 | 323,31 | 7,22E+10 | 229 | 2,83E+08 | 20022000 |
| 7,7  | 0    | 38,865 | 0 | 26,998 | 1,99E+09 | 17  | 0        | 0        |
| 27   | 27   | 12,759 | 0 | 5,4929 | 1,72E+09 | 8   | 9018300  | 39553000 |
| 41   | 41   | 38,069 | 0 | 64,295 | 2,72E+09 | 54  | 13368000 | 2663600  |

| iBAQ 1-5 | iBAQ 2-1 | iBAQ 2-2 | iBAQ 2-3 | iBAQ 2-4 | iBAQ 3-1 | iBAQ 3-2 | iBAQ 3-3 | iBAQ 3-4 |
|----------|----------|----------|----------|----------|----------|----------|----------|----------|
| 1,82E+08 | 1,05E+08 | 1,32E+08 | 91384000 | 1,47E+08 | 60927000 | 48299000 | 59657000 | 1,09E+08 |
| 2,19E+08 | 40525000 | 34509000 | 46834000 | 41358000 | 6615700  | 3411300  | 7267300  | 1,24E+08 |
| 97959000 | 7555900  | 4620300  | 20505000 | 16035000 | 28207    | 21636    | 24610    | 71577000 |
| 27575000 | 210850   | 461720   | 8027,8   | 43448    | 0        | 0        | 0        | 1083900  |
| 31740000 | 916690   | 25936    | 172870   | 519910   | 258390   | 33832    | 1652600  | 318810   |
| 4,03E+08 | 65898000 | 50950000 | 1,09E+08 | 1,12E+08 | 11830000 | 4731800  | 3983700  | 5,01E+08 |
| 35007000 | 4229200  | 177750   | 23580    | 3145600  | 31924    | 4447,6   | 2518700  | 164010   |
| 49636000 | 4218700  | 3013200  | 5472900  | 3077900  | 103020   | 989190   | 26555    | 20837000 |
| 114900   | 111040   | 83312    | 21802000 | 25206000 | 29277000 | 29182000 | 20714000 | 88344    |
| 78521    | 64080    | 139190   | 143620   | 124760   | 89228    | 164760   | 177490   | 56133    |
| 29242000 | 39609000 | 32490000 | 17230000 | 26972000 | 24950000 | 20929000 | 14283000 | 8368400  |
| 0        | 230370   | 126850   | 164700   | 135830   | 159120   | 179900   | 151870   | 334010   |
| 52278000 | 1,62E+08 | 1,32E+08 | 81273000 | 82041000 | 2,05E+08 | 1,59E+08 | 1,5E+08  | 1,14E+08 |
| 15244000 | 0        | 7053000  | 710930   | 3327300  | 584480   | 3818100  | 535120   | 639020   |
| 2E+08    | 2,18E+08 | 1,91E+08 | 2,59E+08 | 2,69E+08 | 1,77E+08 | 1,89E+08 | 1,61E+08 | 1,68E+08 |
| 23838    | 646900   | 239000   | 8401,8   | 9439,1   | 223790   | 174350   | 122860   | 21909    |
| 402960   | 2153600  | 957970   | 499750   | 324580   | 135480   | 397720   | 275690   | 192390   |
| 13930000 | 36281000 | 28205000 | 20357000 | 22626000 | 51405000 | 40424000 | 34476000 | 16936000 |
| 7473700  | 6273400  | 6123300  | 4653000  | 5297700  | 7930100  | 3129100  | 5662800  | 5957500  |
| 13357000 | 10353000 | 4761500  | 3139500  | 1882700  | 4061700  | 2044300  | 3612200  | 8934000  |
| 0        | 1967000  | 1524400  | 0        | 4279,3   | 1223100  | 902590   | 1676000  | 13886    |
| 27551000 | 2,16E+08 | 1,35E+08 | 1,74E+08 | 1,39E+08 | 3,79E+08 | 3,46E+08 | 3,5E+08  | 1,36E+08 |
| 2033800  | 3624300  | 2735800  | 2599600  | 2297300  | 400020   | 8990700  | 4583100  | 6714600  |
| 39423000 | 14621000 | 14565000 | 7251600  | 14615000 | 0        | 9435800  | 0        | 12914000 |
| 639750   | 6368500  | 5430700  | 1430400  | 2615000  | 11815000 | 9264400  | 10239000 | 2180000  |
| 2381400  | 3688500  | 1138000  | 2197900  | 677430   | 1350200  | 391630   | 741190   | 1984800  |
| 18283000 | 4233900  | 650300   | 226370   | 3595400  | 58313    | 0        | 0        | 10344000 |
| 996690   | 600200   | 469310   | 588320   | 22679    | 631890   | 675290   | 767890   | 314280   |
| 10513000 | 204400   | 19545000 | 13218000 | 7775800  | 34127000 | 30843000 | 47751000 | 39640000 |
| 12031000 | 15576000 | 17121000 | 28386000 | 28861000 | 72395000 | 66779000 | 53269000 | 926910   |
| 1,05E+08 | 2,35E+08 | 2,02E+08 | 74989000 | 1,19E+08 | 2,89E+08 | 1,86E+08 | 1,94E+08 | 2,01E+08 |
| 287240   | 791970   | 1207000  | 0        | 37384    | 9170000  | 7950400  | 5776700  | 1162200  |
| 2702800  | 3771500  | 4837300  | 6209300  | 4407500  | 76335    | 521850   | 105240   | 4324600  |
| 29487000 | 44635000 | 35712000 | 14131000 | 16104000 | 63096000 | 31838000 | 35204000 | 41604000 |
| 50316000 | 49505000 | 39921000 | 33384000 | 39247000 | 45506000 | 45180000 | 35977000 | 51711000 |
| 1059000  | 832450   | 469850   | 1629300  | 1511600  | 147640   | 128010   | 32707    | 1121900  |
| 528490   | 1602400  | 1269100  | 1637300  | 1446200  | 1718100  | 1045700  | 1251000  | 1190500  |
| 0        | 9343,1   | 141610   | 9715,8   | 686790   | 5932600  | 4764000  | 7840100  | 24739    |
| 403000   | 2500100  | 1334000  | 1378500  | 1308900  | 3850300  | 1884600  | 2576400  | 658530   |
| 1,55E+08 | 1,92E+08 | 2,04E+08 | 99544000 | 77229000 | 4,11E+08 | 2,89E+08 | 2,88E+08 | 2,03E+08 |
| 1,11E+08 | 1,08E+08 | 1,19E+08 | 1,06E+08 | 82367000 | 81481000 | 99246000 | 1,37E+08 | 79296000 |
| 14854000 | 8103400  | 6415800  | 4846500  | 8272300  | 4474100  | 4081400  | 2620200  | 9955200  |
| 34340000 | 3,36E+09 | 4,73E+09 | 1,05E+08 | 3,91E+08 | 2,37E+09 | 3,45E+09 | 2,13E+09 | 54176000 |
| 3699900  | 167900   | 187620   | 730820   | 669660   | 783590   | 644580   | 639950   | 2283300  |
| 1324400  | 2133900  | 3518100  | 1255100  | 137430   | 0        | 2258900  | 0        | 97747    |
| 2116500  | 16270000 | 5176900  | 6898000  | 6057200  | 18663000 | 10432000 | 25804000 | 3824200  |
| 3519900  | 7383300  | 3734000  | 3580000  | 3516900  | 3812000  | 4163400  | 3820100  | 3919300  |
| 38363000 | 96996000 | 89981000 | 48083000 | 39776000 | 1,26E+08 | 98471000 | 67365000 | 36460000 |

|          |          |          |          |          |          |          |          |          |
|----------|----------|----------|----------|----------|----------|----------|----------|----------|
| 215050   | 82966    | 118100   | 209690   | 252820   | 97615    | 131470   | 104580   | 68452    |
| 0        | 384920   | 256860   | 0        | 0        | 219380   | 246270   | 203040   | 0        |
| 1,64E+10 | 2,1E+10  | 2,18E+10 | 1,47E+10 | 1,69E+10 | 1,81E+10 | 1,47E+10 | 1,73E+10 | 2,28E+10 |
| 11786000 | 2062800  | 20092000 | 21291000 | 937280   | 15160000 | 13408000 | 15271000 | 30671000 |
| 1,59E+08 | 3,83E+08 | 5,26E+08 | 1,52E+08 | 1,34E+08 | 1,12E+08 | 1,32E+08 | 40595000 | 65369000 |
| 13949000 | 36794000 | 31254000 | 25819000 | 20322000 | 22993000 | 19090000 | 21822000 | 13156000 |
| 2872900  | 919430   | 412820   | 2399700  | 3166900  | 107420   | 157110   | 117220   | 291650   |
| 498610   | 5557800  | 3948700  | 1168700  | 1162100  | 4346800  | 3264600  | 5956900  | 859320   |
| 15815000 | 13400000 | 5847300  | 1085600  | 1082200  | 10154000 | 8089200  | 11397000 | 4013100  |
| 93590000 | 5586300  | 1520900  | 1372100  | 2987600  | 199960   | 0        | 2127200  | 5784700  |
| 54993000 | 18533000 | 9151300  | 10682000 | 10186000 | 15632000 | 14026000 | 43835000 | 1177000  |
| 3650900  | 35490000 | 20408000 | 8419600  | 8554800  | 14660000 | 15677000 | 12225000 | 1850700  |
| 6,06E+08 | 1,01E+09 | 8,81E+08 | 4,96E+08 | 5,35E+08 | 9,67E+08 | 8,24E+08 | 7,77E+08 | 6,33E+08 |
| 36601000 | 12336000 | 12853000 | 1,1E+08  | 43006000 | 17690000 | 8951600  | 24023000 | 29304000 |
| 4899900  | 37985000 | 38978000 | 131790   | 148490   | 4619400  | 5197000  | 12166000 | 6786300  |
| 17827000 | 72562000 | 87642000 | 6827700  | 4905300  | 2,53E+08 | 1,85E+08 | 1,89E+08 | 56359000 |
| 72864    | 310110   | 507650   | 342760   | 145580   | 816210   | 661340   | 722970   | 1255800  |
| 4854700  | 4967600  | 1954400  | 1952600  | 3393500  | 5390100  | 525350   | 3756900  | 4089900  |
| 1397300  | 4730900  | 2081000  | 989720   | 460010   | 1671600  | 1966200  | 2068000  | 1717600  |
| 1931500  | 3552300  | 1911800  | 3709800  | 4191900  | 5640800  | 2131000  | 5751900  | 8249900  |
| 22127000 | 6350800  | 7001900  | 14533000 | 15337000 | 22374000 | 11025000 | 6624900  | 22859000 |
| 4,36E+08 | 9,68E+08 | 7,57E+08 | 1,3E+09  | 9,24E+08 | 7,15E+08 | 4,39E+08 | 5,81E+08 | 1,12E+09 |
| 71416000 | 72631000 | 54177000 | 24272000 | 10427000 | 54317000 | 27292000 | 42971000 | 5229700  |
| 1024000  | 995490   | 393310   | 1554500  | 256150   | 141220   | 213180   | 318400   | 994590   |
| 29321000 | 47318000 | 30098000 | 36169000 | 21226000 | 23021000 | 9606500  | 28188000 | 37924000 |
| 0        | 20937000 | 13857000 | 32459000 | 26807000 | 26709000 | 25082000 | 22270000 | 9153000  |
| 5355200  | 56101000 | 32330000 | 890400   | 2406500  | 85524000 | 33565000 | 50027000 | 3390700  |
| 47984000 | 33719000 | 11325000 | 13995000 | 28474000 | 15008000 | 19226000 | 12486000 | 23964000 |
| 14943000 | 36456000 | 27635000 | 24211000 | 18630000 | 26005000 | 13553000 | 15377000 | 56741000 |
| 9474200  | 4466100  | 4969200  | 4706900  | 4571000  | 4657000  | 4688800  | 3378700  | 5604800  |
| 13821000 | 68859000 | 48922000 | 29689000 | 32317000 | 35765000 | 31455000 | 26640000 | 44134000 |
| 34779000 | 64872000 | 41657000 | 19132000 | 85064000 | 49624000 | 42816000 | 45368000 | 59032000 |
| 9935300  | 14082000 | 4720400  | 11029000 | 7304500  | 7058600  | 7131500  | 5887300  | 6701100  |
| 47917000 | 1,37E+08 | 84217000 | 1,63E+08 | 1,09E+08 | 1,79E+08 | 1,55E+08 | 1,34E+08 | 1,26E+08 |
| 41287000 | 34238000 | 22387000 | 56231000 | 97100000 | 37127000 | 26358000 | 3075000  | 7745900  |
| 26884000 | 51580000 | 46058000 | 26581000 | 32880000 | 80598000 | 61567000 | 61938000 | 23160000 |
| 1,09E+09 | 8,96E+08 | 1,03E+09 | 1,09E+09 | 1,17E+09 | 1,39E+09 | 8,77E+08 | 1,22E+09 | 8,8E+08  |
| 3996500  | 10678000 | 7514000  | 7969000  | 7600600  | 8394300  | 6119500  | 4601800  | 11384000 |
| 30019000 | 65485000 | 89792000 | 52195000 | 55961000 | 1,92E+08 | 1,2E+08  | 1,97E+08 | 1E+08    |
| 2335900  | 1838500  | 1734200  | 4253600  | 4157300  | 3882100  | 3745000  | 2287600  | 2609700  |
| 1110300  | 6232000  | 874710   | 530190   | 583580   | 1026300  | 6464700  | 478740   | 1867200  |
| 0        | 2524300  | 485520   | 134320   | 215520   | 44103    | 153150   | 32416    | 0        |
| 17152000 | 23998000 | 13087000 | 14632000 | 14478000 | 7597800  | 4544800  | 5377200  | 18418000 |
| 2166900  | 2997500  | 333290   | 1959700  | 1475600  | 1963800  | 2219100  | 2752000  | 2278200  |
| 643540   | 15559000 | 11083000 | 4065100  | 2373300  | 13966000 | 67739000 | 6657100  | 4849400  |
| 5049200  | 48052000 | 69258000 | 42977000 | 22012000 | 1,67E+08 | 79332000 | 1,52E+08 | 6511000  |
| 99425000 | 1,95E+08 | 2,17E+08 | 1,1E+08  | 55882000 | 1,5E+08  | 84413000 | 2,42E+08 | 65920000 |
| 0        | 1918000  | 1511600  | 552490   | 640380   | 1071300  | 1375000  | 792110   | 150430   |
| 903880   | 1206500  | 353830   | 152650   | 428070   | 988020   | 1181700  | 299400   | 2060300  |
| 224780   | 984650   | 100190   | 668190   | 437400   | 996490   | 2071600  | 1760900  | 32627    |

|          |          |          |          |          |          |          |          |          |
|----------|----------|----------|----------|----------|----------|----------|----------|----------|
| 0        | 539650   | 165920   | 312850   | 164500   | 28977    | 82198    | 1649000  | 56252    |
| 49852000 | 55434000 | 37191000 | 16565000 | 16506000 | 30389000 | 31779000 | 19848000 | 22718000 |
| 1886200  | 3050900  | 3429400  | 2659200  | 2091000  | 4235900  | 3263200  | 4408800  | 3995900  |
| 30113000 | 46096000 | 44319000 | 2552800  | 34726000 | 21436000 | 687200   | 1394500  | 5528800  |
| 15875000 | 59735000 | 43419000 | 42222000 | 43375000 | 76475000 | 68665000 | 65412000 | 1,03E+08 |
| 24177000 | 48974000 | 51668000 | 42281000 | 45663000 | 74211000 | 75251000 | 77066000 | 39901000 |
| 3131100  | 14883000 | 17426000 | 16066000 | 11594000 | 36215000 | 7593400  | 19921000 | 17679000 |
| 398550   | 1362900  | 584540   | 2554100  | 1024400  | 5081000  | 9786300  | 6024300  | 2069500  |
| 47336000 | 43580000 | 30528000 | 31958000 | 20996000 | 25448000 | 27765000 | 10688000 | 67320000 |
| 4628100  | 4498000  | 7374400  | 3586200  | 5312300  | 5616300  | 5550400  | 5534600  | 7339800  |
| 4885900  | 23180000 | 4513400  | 24004000 | 17549000 | 64303000 | 44772000 | 33758000 | 5754600  |
| 2615000  | 991100   | 408750   | 359690   | 243830   | 345670   | 175420   | 790890   | 1808100  |
| 3975000  | 8148100  | 3356300  | 1891400  | 3577800  | 3188300  | 7263400  | 6039700  | 9536400  |
| 5614500  | 4036800  | 13823000 | 13295000 | 1016900  | 31728000 | 25435000 | 4436300  | 4996400  |
| 509920   | 1673100  | 350350   | 253220   | 301970   | 27477    | 10296    | 0        | 0        |
| 47341000 | 59775000 | 20268000 | 45713000 | 16222000 | 54921000 | 56264000 | 44206000 | 31483000 |
| 0        | 26785000 | 8278600  | 0        | 0        | 20994000 | 35778000 | 25478000 | 0        |
| 564620   | 2742100  | 951150   | 1184800  | 1042700  | 14862000 | 8506800  | 7509700  | 2337300  |
| 64855    | 1795100  | 4334600  | 229810   | 107300   | 3928000  | 4247600  | 2324300  | 432860   |
| 2354200  | 6287000  | 8251300  | 2771200  | 2881600  | 4306200  | 4876000  | 4217800  | 3785900  |
| 15350000 | 23824000 | 22523000 | 15958000 | 0        | 0        | 26174000 | 22580000 | 21862000 |
| 0        | 235270   | 204010   | 117010   | 93420    | 221170   | 313830   | 216280   | 86530    |
| 15951    | 699830   | 50694    | 543750   | 221810   | 57689    | 31837    | 837520   | 2973200  |
| 19608000 | 24480000 | 21652000 | 2876400  | 3734300  | 31635000 | 9583700  | 15300000 | 33276000 |
| 232680   | 886330   | 483090   | 178550   | 1638200  | 11482000 | 1409300  | 9706600  | 1869100  |
| 64845000 | 55280000 | 29663000 | 58580000 | 69350000 | 54209000 | 68709000 | 40992000 | 68165000 |
| 5683200  | 6872300  | 1801300  | 458650   | 1399800  | 1234300  | 1101400  | 2277800  | 2742400  |
| 19174000 | 32335000 | 18562000 | 25684000 | 21937000 | 20368000 | 22750000 | 20584000 | 17590000 |
| 245000   | 440740   | 95521    | 10158    | 68303    | 26037    | 11112    | 362620   | 1138400  |
| 5628800  | 2703100  | 2577600  | 5474900  | 3243100  | 9301700  | 2998400  | 5052100  | 2902200  |
| 1,97E+08 | 2,47E+08 | 1,82E+08 | 2,31E+08 | 2,42E+08 | 5,8E+08  | 4,18E+08 | 3,61E+08 | 2,5E+08  |
| 1063800  | 9016000  | 7426100  | 3955500  | 7096900  | 2074800  | 517490   | 0        | 362010   |
| 434000   | 12303000 | 23079000 | 3843400  | 4492300  | 11940000 | 431740   | 3274900  | 4103200  |
| 1250000  | 726740   | 334760   | 1807200  | 721410   | 794420   | 429520   | 106020   | 1253900  |
| 29674000 | 80375000 | 1,16E+08 | 42079000 | 81811000 | 1,9E+08  | 2,94E+08 | 3,28E+08 | 1,43E+08 |
| 13047    | 422500   | 51700    | 4837,5   | 34500    | 36906000 | 20182000 | 26490000 | 201000   |
| 3614400  | 7568800  | 5390300  | 2761500  | 3545000  | 4585800  | 9450600  | 5826200  | 9483400  |
| 2465300  | 6076100  | 3567000  | 955480   | 778580   | 1794700  | 2394200  | 1778600  | 1349800  |
| 4611800  | 25697000 | 7099600  | 1403200  | 30219000 | 26981000 | 11932000 | 3735300  | 31170000 |
| 1,33E+08 | 44361000 | 89486000 | 56402000 | 46069000 | 37914000 | 5106200  | 25516000 | 2,4E+08  |
| 2865700  | 6671000  | 973290   | 1618900  | 6551600  | 44378000 | 92984000 | 83365000 | 7422900  |
| 4528100  | 11167000 | 17090000 | 19611000 | 10555000 | 45536000 | 30795000 | 35279000 | 28766000 |
| 1863300  | 2148400  | 11368000 | 463350   | 294690   | 859240   | 207440   | 627230   | 552630   |
| 54653000 | 97647000 | 59853000 | 45166000 | 48324000 | 72823000 | 66026000 | 51302000 | 1E+08    |
| 711780   | 14984000 | 2980100  | 8875500  | 9888600  | 7429900  | 5712700  | 6512200  | 3582000  |
| 131200   | 26045    | 20893    | 155490   | 137210   | 92771    | 97682    | 80599    | 283420   |
| 114580   | 511800   | 515550   | 841040   | 596960   | 1513900  | 1613200  | 382330   | 370260   |
| 4186700  | 8284600  | 3395700  | 430240   | 2567300  | 288600   | 176800   | 0        | 955330   |
| 134240   | 84157    | 384880   | 267430   | 167620   | 78571    | 40390    | 1410100  | 3825100  |
| 0        | 2944800  | 2909900  | 600990   | 2468800  | 984840   | 2354600  | 0        | 1706800  |

|          |          |          |          |          |          |          |          |          |
|----------|----------|----------|----------|----------|----------|----------|----------|----------|
| 850390   | 2653000  | 4397100  | 12391000 | 5459600  | 13679000 | 8532700  | 5094100  | 1362200  |
| 89312000 | 1,75E+08 | 1,39E+08 | 1,23E+08 | 1,2E+08  | 1,17E+08 | 97577000 | 1,15E+08 | 2,06E+08 |
| 17609    | 54107    | 1699900  | 897600   | 19699    | 6072,3   | 0        | 0        | 0        |
| 865890   | 939080   | 67069    | 33608    | 92605    | 237110   | 204290   | 169660   | 437960   |
| 1,04E+08 | 2,04E+08 | 2,28E+08 | 2,67E+08 | 1,77E+08 | 2,61E+08 | 1,31E+08 | 2,83E+08 | 1,52E+08 |
| 1,64E+09 | 3,16E+09 | 1,83E+09 | 3,26E+09 | 1,94E+09 | 3,29E+09 | 1,38E+09 | 2,63E+09 | 2,7E+09  |
| 585070   | 1175000  | 925850   | 603810   | 67625    | 3331200  | 2385300  | 2152100  | 54472    |
| 7034500  | 12217000 | 2674500  | 8963800  | 9819600  | 5250600  | 2834400  | 8120600  | 8996500  |
| 7730500  | 9172200  | 5510200  | 7147000  | 5013000  | 6152000  | 5342100  | 7172500  | 15451000 |
| 5143900  | 12384000 | 5910400  | 6025400  | 5157600  | 13138000 | 9538500  | 8454600  | 14261000 |
| 4478500  | 3657700  | 3046000  | 457790   | 1572500  | 6894300  | 14098000 | 7553800  | 3517800  |
| 50739000 | 2,22E+08 | 1,68E+08 | 52830000 | 38762000 | 2,59E+08 | 2,28E+08 | 1,97E+08 | 1,12E+08 |
| 549670   | 239930   | 730550   | 380080   | 375020   | 165840   | 173360   | 187520   | 914720   |
| 6440000  | 2250300  | 8533100  | 17587000 | 12336000 | 2962000  | 14845000 | 2730300  | 1560900  |
| 1,01E+08 | 1,54E+08 | 1,76E+08 | 68020000 | 1,05E+08 | 1,41E+08 | 1,21E+08 | 1,93E+08 | 85416000 |
| 41910000 | 99454000 | 1,08E+08 | 90809000 | 1,01E+08 | 1,14E+08 | 1,28E+08 | 1,21E+08 | 1,04E+08 |
| 0        | 0        | 0        | 0        | 0        | 919880   | 91628    | 84405    | 69351    |
| 11069000 | 21667000 | 30476000 | 19059000 | 16835000 | 37319000 | 25814000 | 31706000 | 33210000 |
| 1,34E+08 | 2,39E+08 | 1,61E+08 | 71774000 | 45707000 | 84781000 | 39352000 | 80158000 | 46462000 |
| 1423900  | 19339000 | 18337000 | 16780000 | 23172000 | 911920   | 1128200  | 1135700  | 1642200  |
| 1112100  | 1382700  | 682400   | 2302300  | 2577100  | 1542200  | 3030300  | 876070   | 123680   |
| 2997300  | 6878200  | 5493100  | 7455200  | 8357000  | 2349300  | 2498300  | 3578300  | 3349100  |
| 419210   | 1406200  | 748630   | 5639800  | 955750   | 214840   | 430000   | 552740   | 456350   |
| 1609100  | 2429400  | 1953900  | 32063000 | 31407000 | 14608000 | 9713000  | 5981700  | 4378200  |
| 1948900  | 1929500  | 1741400  | 879280   | 1289500  | 8670700  | 8390800  | 7596200  | 6608100  |
| 3462600  | 4445400  | 3489800  | 3876100  | 5970400  | 2786800  | 1432100  | 116750   | 4681100  |
| 143140   | 149220   | 273720   | 18487    | 93938    | 9996,6   | 109620   | 10666    | 28236    |
| 90297    | 261310   | 239340   | 336910   | 229650   | 240560   | 306520   | 317480   | 109540   |
| 105440   | 34258000 | 9122300  | 0        | 0        | 31512000 | 25213000 | 40969000 | 14786000 |
| 101120   | 136900   | 106230   | 69655    | 69513    | 172580   | 36870    | 260470   | 190810   |
| 181910   | 1416100  | 3324200  | 3688600  | 3941100  | 18496000 | 4072000  | 10159000 | 0        |
| 1706300  | 1617500  | 1001600  | 1201400  | 122270   | 1171500  | 1065600  | 9231700  | 30839000 |
| 15978    | 10850000 | 7294600  | 3097500  | 4566800  | 8477300  | 3311600  | 11317000 | 12047000 |
| 2188600  | 1023200  | 865370   | 948010   | 1120500  | 546660   | 680510   | 624150   | 1331900  |
| 10790000 | 2615500  | 12031000 | 409580   | 9383900  | 19149000 | 1070800  | 9065700  | 7795300  |
| 3898700  | 426320   | 0        | 239380   | 520440   | 662200   | 0        | 0        | 0        |
| 25231000 | 1,21E+08 | 83370000 | 16603000 | 17858000 | 1,4E+08  | 64703000 | 77697000 | 8362400  |
| 829560   | 31504000 | 14057000 | 3685700  | 2937800  | 18960000 | 17700000 | 18595000 | 1688900  |
| 39489    | 117180   | 160360   | 180700   | 115960   | 96832    | 63601    | 75511    | 42765    |
| 4583300  | 1771200  | 708920   | 423580   | 135310   | 1041400  | 2859000  | 1657300  | 5877900  |
| 0        | 33527    | 51927    | 17977    | 26782    | 29206    | 19278    | 49526    | 15066    |
| 2108400  | 3685500  | 1731300  | 1011400  | 2108400  | 6948300  | 2919600  | 3027700  | 3947300  |
| 171190   | 846360   | 958140   | 437690   | 461990   | 755570   | 834130   | 690680   | 726870   |
| 29990000 | 34102000 | 26451000 | 39245000 | 36520000 | 32588000 | 23544000 | 39796000 | 54007000 |
| 1439800  | 3694900  | 3112200  | 343170   | 380430   | 126050   | 195770   | 2566000  | 14129000 |
| 8,16E+08 | 4,44E+09 | 3,85E+09 | 3E+09    | 3,04E+09 | 3,67E+09 | 3,43E+09 | 3,97E+09 | 3,71E+09 |
| 51006000 | 46953000 | 35582000 | 27638000 | 29204000 | 29268000 | 35476000 | 45700000 | 47358000 |
| 1738300  | 20937000 | 1656400  | 12164000 | 1293400  | 471300   | 2559900  | 9277100  | 3266000  |
| 8671100  | 15272000 | 14231000 | 21665000 | 8360200  | 5621200  | 6073100  | 15873000 | 8153000  |
| 17469000 | 78262000 | 16449000 | 1,11E+08 | 94139000 | 61383000 | 57606000 | 89905000 | 60342000 |



|          |          |          |          |          |          |          |          |          |
|----------|----------|----------|----------|----------|----------|----------|----------|----------|
| 2,74E+08 | 80414000 | 63561000 | 1,24E+08 | 1,64E+08 | 1,21E+08 | 2390300  | 40798000 | 3,53E+08 |
| 4368600  | 2286800  | 493440   | 2026700  | 1070600  | 1865300  | 1526300  | 2359100  | 182630   |
| 20475000 | 40651000 | 82397000 | 45655000 | 48278000 | 2749100  | 33811000 | 54151000 | 1,06E+08 |
| 64358000 | 1,26E+08 | 1,05E+08 | 1,03E+08 | 1E+08    | 1,47E+08 | 1,21E+08 | 1,1E+08  | 59192000 |
| 53292000 | 1,23E+08 | 76969000 | 68361000 | 56861000 | 95065000 | 1,11E+08 | 1,3E+08  | 27577000 |
| 2,66E+08 | 3,27E+08 | 3,29E+08 | 2,01E+08 | 1,52E+08 | 3,37E+08 | 1,21E+08 | 1,86E+08 | 1,22E+08 |
| 11216000 | 10729000 | 6854500  | 7890300  | 8859200  | 22486000 | 31864000 | 9694800  | 7987600  |
| 24071000 | 36136000 | 29285000 | 19162000 | 37122000 | 82755000 | 84533000 | 73413000 | 26313000 |
| 343140   | 951700   | 842810   | 444170   | 405350   | 250270   | 232330   | 198010   | 463180   |
| 0        | 6970200  | 1768200  | 1349200  | 785500   | 13768000 | 12798000 | 3233600  | 0        |
| 331050   | 1003900  | 1501600  | 1061100  | 1817800  | 3108300  | 983480   | 2412300  | 1370700  |
| 12470000 | 16906000 | 9237500  | 11047000 | 10283000 | 28313000 | 19470000 | 11638000 | 9270000  |
| 38834000 | 24155000 | 14584000 | 58162000 | 27051000 | 14253000 | 23726000 | 14500000 | 32792000 |
| 1262900  | 4497700  | 3815300  | 1429400  | 2603200  | 4132900  | 953940   | 4290500  | 3173600  |
| 10039000 | 1208500  | 963310   | 2047900  | 1612300  | 4468700  | 3812100  | 3891800  | 3642700  |
| 229220   | 55399    | 509900   | 186320   | 214500   | 1593000  | 365360   | 535810   | 386630   |
| 32548000 | 1,44E+08 | 1,37E+08 | 29788000 | 30909000 | 1,87E+08 | 1,77E+08 | 1,51E+08 | 71265000 |
| 73951000 | 1,26E+08 | 93276000 | 58259000 | 49557000 | 77373000 | 52941000 | 56885000 | 58555000 |
| 41721000 | 22917000 | 55426000 | 50588000 | 51872000 | 66047000 | 52326000 | 54662000 | 47693000 |
| 6041600  | 1539200  | 1123000  | 4216800  | 2592600  | 3228500  | 1910400  | 957120   | 2338700  |
| 3359300  | 8412800  | 5438900  | 6098600  | 4135700  | 4105700  | 5691200  | 4894700  | 2899900  |
| 37044000 | 6,17E+08 | 6,56E+08 | 3,42E+08 | 3,78E+08 | 8,27E+08 | 5,07E+08 | 6,61E+08 | 4,61E+08 |
| 12228    | 3302700  | 2706200  | 154290   | 101840   | 9393100  | 3185000  | 6156400  | 348900   |
| 4480700  | 35552000 | 46108000 | 43277000 | 22996000 | 22419000 | 18940000 | 21083000 | 6627200  |
| 89459000 | 2,27E+08 | 1,72E+08 | 80458000 | 1,9E+08  | 2,73E+08 | 77437000 | 2,05E+08 | 1,84E+08 |
| 10602000 | 682660   | 107950   | 3928300  | 1997000  | 157980   | 575110   | 13801    | 2641500  |
| 1647400  | 15260000 | 10844000 | 815300   | 6598700  | 553060   | 6074900  | 7715300  | 6578000  |
| 1436400  | 9821700  | 3074100  | 3137100  | 4096500  | 9289600  | 5015100  | 7267100  | 706370   |
| 0        | 0        | 12259    | 0        | 0        | 9337300  | 8358200  | 208090   | 46366    |
| 483740   | 7300200  | 6309000  | 0        | 0        | 8564500  | 4318000  | 4088100  | 0        |
| 22271000 | 22491000 | 15471000 | 50178000 | 46881000 | 24443000 | 19879000 | 19544000 | 22028000 |
| 1,39E+08 | 5,7E+08  | 5,05E+08 | 2,63E+08 | 2,72E+08 | 9,2E+08  | 8,35E+08 | 7,71E+08 | 5,14E+08 |
| 1596000  | 10125000 | 7702300  | 1641200  | 446320   | 5853600  | 5587800  | 3250500  | 1408100  |
| 2978200  | 3826700  | 3431600  | 1643600  | 1541200  | 2518900  | 1878200  | 447200   | 6480900  |
| 4,76E+08 | 8,1E+08  | 6,21E+08 | 2,57E+08 | 3,1E+08  | 8,77E+08 | 5,27E+08 | 5,37E+08 | 7,81E+08 |
| 1267800  | 2882900  | 6371400  | 4784800  | 4056400  | 15235000 | 4018500  | 21550000 | 2641200  |
| 1868100  | 4454000  | 2506500  | 2349600  | 3137800  | 3103200  | 1558800  | 1506700  | 5009900  |
| 90036    | 15394    | 329530   | 6993,4   | 4909,4   | 135270   | 54222    | 0        | 0        |
| 5629400  | 10354000 | 6730300  | 3115900  | 3156800  | 4972800  | 3287100  | 3246900  | 5035400  |
| 2008500  | 9008000  | 2518100  | 1584600  | 1880700  | 7710800  | 6280400  | 6192800  | 2710700  |
| 79332000 | 38383000 | 35204000 | 1,24E+08 | 93233000 | 64160000 | 79940000 | 1,1E+08  | 12496000 |
| 2,23E+08 | 3,06E+08 | 4,34E+08 | 2,56E+08 | 2,26E+08 | 3,54E+08 | 5,09E+08 | 3,99E+08 | 2,56E+08 |
| 17027000 | 50769000 | 43176000 | 10246000 | 12801000 | 34611000 | 22162000 | 38012000 | 41163000 |
| 1002300  | 2291100  | 298270   | 4330600  | 1230900  | 1098200  | 31634    | 2128700  | 45655    |
| 8828800  | 18841000 | 39162000 | 31162000 | 18598000 | 70020000 | 52721000 | 78125000 | 53814000 |
| 64480000 | 61455000 | 47967000 | 81579000 | 79961000 | 39820000 | 31420000 | 45717000 | 47305000 |
| 796200   | 11279000 | 1882200  | 2097100  | 2292300  | 1681000  | 1691800  | 1994000  | 2372100  |
| 627300   | 0        | 259280   | 0        | 106910   | 199590   | 134440   | 0        | 119610   |
| 606330   | 1428800  | 705030   | 385330   | 366140   | 6432200  | 5349700  | 7451000  | 1874600  |
| 1145700  | 3091000  | 7271200  | 23391    | 24282    | 5657100  | 14586000 | 4065100  | 33088    |

|               |          |          |          |          |          |          |          |          |
|---------------|----------|----------|----------|----------|----------|----------|----------|----------|
| 11247         | 2089000  | 4025700  | 2553100  | 389920   | 8701000  | 8097200  | 8049000  | 10453000 |
| 4508100       | 1681400  | 1779200  | 4359700  | 4883800  | 125270   | 1068700  | 781010   | 1739900  |
| 169680        | 356090   | 276600   | 30010    | 112440   | 333970   | 228640   | 180750   | 155470   |
| 666160        | 11817000 | 12244000 | 473290   | 507440   | 17952000 | 11642000 | 17567000 | 9736500  |
| 594070        | 19758000 | 19612000 | 11722000 | 4948700  | 14865000 | 27437000 | 21406000 | 10862000 |
| 2757500       | 3006000  | 1305800  | 131070   | 1043500  | 10562000 | 6756600  | 9589000  | 15967    |
| 46266000      | 1,76E+08 | 1,62E+08 | 38799000 | 44761000 | 1,91E+08 | 1,43E+08 | 77791000 | 12925000 |
| 139740        | 117150   | 68191    | 63067    | 54501    | 139180   | 112320   | 239270   | 431040   |
| 1388700       | 4070700  | 1956000  | 2171900  | 4670600  | 129090   | 1783300  | 217560   | 6742400  |
| 2400400       | 3246700  | 880040   | 2253100  | 2151800  | 2390600  | 1228800  | 1277400  | 2739700  |
| 8268700       | 40633000 | 37509000 | 16472000 | 19337000 | 50362000 | 39359000 | 30740000 | 21783000 |
| 21210         | 126400   | 78488    | 13311    | 4421,6   | 397330   | 213590   | 275180   | 296080   |
| 2275500       | 2467700  | 1610100  | 1462700  | 1821500  | 11595000 | 6207100  | 10618000 | 3689400  |
| 7526900       | 10733000 | 8014900  | 14101000 | 17800000 | 4814100  | 2890200  | 6051100  | 13808000 |
| 513650        | 931210   | 897700   | 6536200  | 7923900  | 400690   | 4095300  | 496770   | 3853400  |
| 1255100       | 1123100  | 1425600  | 1134700  | 658420   | 4209400  | 2148600  | 2700100  | 341170   |
| 4103600       | 1020700  | 491180   | 6317600  | 5408000  | 1910900  | 1219800  | 1699900  | 3490100  |
| 4598400       | 18907000 | 12056000 | 11895000 | 10116000 | 32147000 | 25670000 | 21787000 | 12655000 |
| 380930        | 394450   | 233370   | 333960   | 298120   | 154210   | 2507900  | 5769400  | 1300500  |
| 8304200       | 29925000 | 25528000 | 23943000 | 6387100  | 53006000 | 50748000 | 40329000 | 20034000 |
| 6558500       | 22155000 | 28806000 | 5749200  | 8895100  | 22967000 | 18273000 | 24302000 | 7720700  |
| 34223000      | 53591000 | 84912000 | 49173000 | 51800000 | 709250   | 56249000 | 73459000 | 36044000 |
| 407710        | 11692000 | 2004100  | 601500   | 533500   | 1029100  | 894900   | 1298100  | 1116900  |
| 180960        | 5026,6   | 71172    | 447070   | 489760   | 97372    | 93446    | 3427,8   | 325230   |
| 5932800       | 8989800  | 4447200  | 8801900  | 5473300  | 4462300  | 4106700  | 282780   | 1566800  |
| 2005400       | 3735400  | 3343100  | 4371100  | 2649200  | 1479700  | 2865200  | 8327400  | 6255300  |
| 18015000      | 42766000 | 51836000 | 25624000 | 15732000 | 49831000 | 47011000 | 44505000 | 41083000 |
| 29774000      | 19025000 | 14395000 | 11715000 | 20917000 | 29962000 | 29046000 | 32674000 | 22030000 |
| 2969700       | 211360   | 210550   | 320570   | 293730   | 95702    | 57033    | 50182    | 59157    |
| 3991300       | 19748000 | 8706300  | 3972100  | 3031300  | 555610   | 12290000 | 872070   | 8137400  |
| 25922000      | 16702000 | 78997000 | 40511000 | 42579000 | 848060   | 2288400  | 83522000 | 255490   |
| 7578700       | 2440000  | 4405000  | 5696500  | 4542000  | 13366000 | 7409900  | 7991700  | 8534100  |
| 1814000       | 3075400  | 199930   | 6636400  | 4079000  | 5406000  | 3141300  | 2235200  | 242170   |
| 1581800       | 0        | 122590   | 458910   | 9392300  | 0        | 0        | 0        | 2258000  |
| 9785800       | 13476000 | 17330000 | 15479000 | 20954000 | 4618500  | 13932000 | 12040000 | 12251000 |
| 1,03E+09      | 1,52E+09 | 1,4E+09  | 3,32E+09 | 3,3E+09  | 2,41E+09 | 1,93E+09 | 2,37E+09 | 1,15E+09 |
| 2198700       | 9511400  | 9987700  | 12240000 | 5983300  | 440490   | 4866300  | 4471200  | 2736900  |
| 6838400       | 2331300  | 2585400  | 22674000 | 23935000 | 7904300  | 7630300  | 4619600  | 25856000 |
| 19128000      | 57285000 | 51440000 | 34573000 | 34508000 | 67250000 | 62687000 | 56468000 | 32542000 |
| 17176000      | 2,09E+08 | 3,59E+08 | 33559000 | 14240    | 4,98E+08 | 8,76E+08 | 2,59E+08 | 1914200  |
| 0             | 22733000 | 25546000 | 16728    | 19658    | 31133000 | 41316000 | 29162000 | 229830   |
| 63748         | 22608000 | 38373000 | 133460   | 1171200  | 44600000 | 35582000 | 18577000 | 375850   |
| ntigen OS=Hom |          |          |          |          |          |          |          |          |
| 831260        | 10998000 | 2704600  | 1052500  | 0        | 23233000 | 16291000 | 17599000 | 5953100  |
| 87889         | 73687    | 65350    | 251030   | 281800   | 45721    | 51231    | 38103    | 60169    |
| 32887         | 11261000 | 14385000 | 31679000 | 46276000 | 30816000 | 12062000 | 21324000 | 10422000 |
| 171330        | 17590000 | 16631000 | 12359000 | 19762000 | 13544000 | 7727300  | 6778300  | 7545500  |
| 15246000      | 58785000 | 96481000 | 42391000 | 17423000 | 99906000 | 79547000 | 82599000 | 24076000 |
| 1871000       | 9836600  | 6318200  | 5023200  | 4078400  | 3430000  | 9821800  | 17080000 | 91666    |
| 2,21E+08      | 2,64E+08 | 1,87E+08 | 77783000 | 96763000 | 1,29E+08 | 1,09E+08 | 70512000 | 1,38E+08 |

|          |          |          |          |          |          |          |          |          |
|----------|----------|----------|----------|----------|----------|----------|----------|----------|
| 887020   | 19300000 | 10887000 | 4722400  | 8407000  | 19072000 | 28634000 | 32527000 | 10037000 |
| 17654000 | 34429000 | 9474100  | 6613300  | 4293100  | 27189    | 5624200  | 2548800  | 4417600  |
| 1,43E+08 | 2,12E+08 | 2,47E+08 | 2,1E+08  | 1,1E+08  | 2,03E+08 | 2,09E+08 | 2,3E+08  | 3,12E+08 |
| 46364000 | 6,46E+08 | 4,47E+08 | 2,12E+08 | 1,39E+08 | 3,49E+08 | 3,66E+08 | 3,06E+08 | 1,93E+08 |
| 0        | 1844100  | 7713300  | 0        | 670990   | 29065000 | 22905000 | 45292000 | 3167000  |
| 14813000 | 68825000 | 27235000 | 5365200  | 26930000 | 7431400  | 23949000 | 42821000 | 20424000 |
| 3127200  | 10215000 | 6946400  | 1788900  | 3031000  | 21819000 | 14093000 | 21828000 | 9978000  |

Student's T Student's T Student's T Student's T Majority p Fasta headers

|          |          |          |          |                                                   |
|----------|----------|----------|----------|---------------------------------------------------|
| 0,017277 | 0,105191 | 0,734247 | 2,256997 | CON__P00761                                       |
| 0,193944 | 0,29702  | 1,965836 | 1,361167 | CON__P02 ;sp P02533 K1C14_HUMAN Keratin, type I c |
| 0,102059 | 0,171882 | 4,121507 | 1,842281 | tr B4DRU6 B4DRU6 B4DRU6_HUMAN cDNA FLJ5465        |
| 0,607449 | 0,700106 | -0,54043 | -0,49246 | sp P08779 P08779 K1C16_HUMAN Keratin, type I c    |
| 0,317845 | 0,420865 | 1,21116  | 0,999376 | sp P13645 P13645 K1C10_HUMAN Keratin, type I c    |
| 0,159043 | 0,246    | 2,489075 | 1,510088 | CON__P13 ;sp P13647 K2C5_HUMAN Keratin, type II c |
| 0,569681 | 0,675037 | 0,681096 | 0,552473 | CON__P35 ;sp P35527 K1C9_HUMAN Keratin, type I cy |
| 0,280215 | 0,346351 | 2,418231 | 1,131149 | sp Q04695 Q04695 K1C17_HUMAN Keratin, type I c    |
| 0,628426 | 0,703668 | -0,88977 | -0,48213 | tr A0M8Q9 A0M8Q9 A0M8Q9_HUMAN C1 segment          |
| 0,432506 | 0,61436  | -0,28643 | -0,6502  | tr A0A1U9X8Y4 A0A1U9X8Y4 A0A1U9X8Y4_HUMAN Chlc    |
| 0,000428 | 0,0246   | 0,560557 | 3,11013  | sp O00391 O00391 QSOX1_HUMAN Sulfhydryl oxid      |
| 0,20048  | 0,34614  | -0,55955 | -1,14399 | tr E9PFW2 E9PFW2 E9PFW2_HUMAN Beta-mannosi        |
| 0,359581 | 0,650899 | -0,15197 | -0,60014 | sp O00468 O00468-6 AGRIN_HUMAN Isoform 6 of A     |
| 0,561178 | 0,669371 | 0,725492 | 0,566887 | sp O00560 O00560-2 SDCB1_HUMAN Isoform 2 of S     |
| 0,145399 | 0,332168 | 0,425902 | 1,201053 | tr Q6FI18 Q6FI18 Q6FI18_HUMAN CYR61 protein C     |
| 0,111575 | 0,302953 | 0,440625 | 1,309967 | tr A0AV88 A0AV88 A0AV88_HUMAN Disintegrin anc     |
| 0,127033 | 0,245079 | 1,015501 | 1,507656 | tr Q53HL1 Q53HL1 Q53HL1_HUMAN Myosin regula       |
| 0,866847 | 0,942397 | -0,02611 | -0,10477 | sp O15230 O15230 LAMA5_HUMAN Laminin subun        |
| 0,063834 | 0,186316 | 0,690444 | 1,707268 | sp O43278 O43278 SPIT1_HUMAN Kunitz-type prot     |
| 0,958178 | 0,978061 | 0,021094 | 0,043416 | tr A0A0S2Z3G9 A0A0S2Z3G9 A0A0S2Z3G9_HUMAN Actir   |
| 0,371452 | 0,485786 | -0,86027 | -0,8683  | sp O60245 O60245-2 PCDH7_HUMAN Isoform B of       |
| 0,187962 | 0,333311 | -0,58646 | -1,18526 | sp O60814 O60814 H2B1K_HUMAN Histone H2B ty       |
| 6,37E-06 | 0        | -4,80394 | -11,2219 | tr B2R717 B2R717 B2R717_HUMAN cDNA, FLJ9323       |
| 0,02611  | 0,0492   | 4,698645 | 2,762629 | tr B4DY05 B4DY05 B4DY05_HUMAN cDNA FLJ5830        |
| 0,060415 | 0,167619 | -1,06523 | -1,89714 | sp O75326 O75326 SEM7A_HUMAN Semaphorin-7A        |
| 0,198214 | 0,342656 | 0,565024 | 1,151586 | sp O75369 O75369-2 FLNB_HUMAN Isoform 2 of Fil    |
| 0,094547 | 0,16693  | 2,337507 | 1,828464 | sp O75635 O75635-2 SPB7_HUMAN Isoform 2 of Se     |
| 0,505694 | 0,614706 | -0,75423 | -0,64697 | tr B4DZ36 B4DZ36 B4DZ36_HUMAN cDNA FLJ58441       |
| 0,00669  | 0,022824 | -1,45239 | -3,16983 | tr B3KNF2 B3KNF2 B3KNF2_HUMAN cDNA FLJ1448        |
| 0,406069 | 0,543689 | -0,5515  | -0,76882 | tr I1W660 I1W660 I1W660_HUMAN Dickkopf-like p     |
| 0,390859 | 0,650163 | -0,16637 | -0,5943  | sp O94985 O94985-2 CSTN1_HUMAN Isoform 2 of C     |
| 0,213927 | 0,299962 | -2,72098 | -1,32237 | tr B3KQQ9 B3KQQ9 B3KQQ9_HUMAN cDNA PSEC00         |
| 0,1033   | 0,174378 | 2,24843  | 1,768744 | tr Q5JPJ9 Q5JPJ9 Q5JPJ9_HUMAN Uncharacterized     |
| 0,320346 | 0,534369 | -0,28117 | -0,78192 | sp O95633 O95633-2 FSTL3_HUMAN Isoform 2 of F     |
| 0,148895 | 0,39429  | 0,293211 | 1,058106 | tr V9HWB9 V9HWB9 V9HWB9_HUMAN L-lactate de        |
| 0,112599 | 0,186146 | 1,541084 | 1,657767 | tr B3KUZ8 B3KUZ8 B3KUZ8_HUMAN Aspartate amir      |
| 0,173112 | 0,3456   | 0,466118 | 1,160827 | sp P00558 P00558-2 PGK1_HUMAN Isoform 2 of Ph     |
| 0,032481 | 0,076114 | -2,43458 | -2,48593 | tr B8ZX62 B8ZX62 B8ZX62_HUMAN Plasminogen ac      |
| 0,692955 | 0,799985 | -0,12335 | -0,31021 | tr V9HWA9 V9HWA9 V9HWA9_HUMAN C3-beta-c O         |
| 5,15E-06 | 0,011    | -0,76263 | -5,07655 | tr Q5H9A7 Q5H9A7 Q5H9A7_HUMAN Metalloprotei       |
| 0,706059 | 0,833624 | 0,07721  | 0,261591 | tr A0A0K0K1J1 A0A0K0K1J1 A0A0K0K1J1_HUMAN Epidic  |
| 0,169394 | 0,333919 | 0,483426 | 1,180354 | tr H0YMD1 H0YMD1 H0YMD1_HUMAN Low-density         |
| 0,574535 | 0,703502 | 0,228123 | 0,470957 | tr F6MZK5 F6MZK5 F6MZK5_HUMAN Insulin (Fragm      |
| 0,485164 | 0,65275  | 0,296539 | 0,594568 | sp P01834 P01834 IGKC_HUMAN Immunoglobulin I      |
| 0,063472 | 0,140857 | 1,920743 | 2,031874 | tr Q8NCL6 Q8NCL6 Q8NCL6_HUMAN cDNA FLJ9017        |
| 0,063713 | 0,176    | -0,81512 | -1,77522 | tr A9LSU1 A9LSU1 A9LSU1_HUMAN Type IV collage     |
| 0,416379 | 0,582922 | 0,342096 | 0,695322 | sp P02545 P02545 LMNA_HUMAN Prelamin-A/C O        |
| 0,002766 | 0,0901   | -0,46134 | -2,37147 | tr A0A0S2Z3D5 A0A0S2Z3D5 A0A0S2Z3D5_HUMAN Apol    |

|          |          |          |          |           |                                |                    |
|----------|----------|----------|----------|-----------|--------------------------------|--------------------|
| 0,289719 | 0,426184 | 0,64472  | 0,983874 | sp P02751 | sp P02751 FINC_HUMAN           | Fibronectin OS=H   |
| 0,482017 | 0,650057 | -0,28064 | -0,59139 | tr D6RBJ7 | tr D6RBJ7 D6RBJ7_HUMAN         | Gc-globulin OS=    |
| 0,163368 | 0,443725 | 0,228437 | 0,936814 | sp P02787 | sp P02787 TRFE_HUMAN           | Serotransferrin O  |
| 0,29374  | 0,453951 | 0,457274 | 0,919187 | sp P02790 | sp P02790 HEMO_HUMAN           | Hemopexin OS=      |
| 0,005153 | 0,013143 | 1,389258 | 3,277427 | tr Q5TZP0 | tr Q5TZP0 Q5TZP0_HUMAN         | Matrix metallo     |
| 0,105826 | 0,319754 | 0,358313 | 1,242614 | sp P04075 | sp P04075-2 ALDOA_HUMAN        | Isoform 2 of I     |
| 0,072641 | 0,171576 | 1,300831 | 1,862835 | tr Q76LA1 | tr Q76LA1 Q76LA1_HUMAN         | CSTB protein C     |
| 0,616459 | 0,738041 | 0,198647 | 0,417118 | sp P04083 | sp P04083 ANXA1_HUMAN          | Annexin A1 OS=     |
| 0,63409  | 0,736067 | -0,28398 | -0,42601 | tr O75942 | tr O75942 O75942_HUMAN         | Major prion pr     |
| 0,304309 | 0,389943 | 1,74221  | 1,055096 | tr H6VRG3 | tr H6VRG3 H6VRG3_HUMAN         | Cytokeratin-1      |
| 0,742614 | 0,797154 | -0,31402 | -0,31    | tr E7EUT5 | tr E7EUT5 E7EUT5_HUMAN         | Glyceraldehyde     |
| 0,608366 | 0,700498 | 0,64179  | 0,498451 | tr A0A0U1 | tr A0A0U1RRH7 A0A0U1RRH7_HUMAN | His                |
| 0,491584 | 0,715034 | 0,119644 | 0,454266 | sp P05067 | sp P05067-8 A4_HUMAN           | Isoform APP751 c   |
| 0,225035 | 0,344508 | 0,814988 | 1,159814 | sp P05109 | sp P05109 S10A8_HUMAN          | Protein S100-A8    |
| 0,469776 | 0,576761 | -1,20561 | -0,72497 | tr B2R7Y0 | tr B2R7Y0 B2R7Y0_HUMAN         | cDNA, FLJ9365      |
| 0,038657 | 0,097273 | -1,82703 | -2,30497 | tr A0A024 | tr A0A024QYT5 A0A024QYT5_HUMAN | Serp               |
| 0,044433 | 0,1596   | -0,80999 | -1,93023 | tr A0A348 | tr A0A348GSH7 A0A348GSH7_HUMAN | Serp               |
| 0,986142 | 0,994413 | -0,00524 | -0,01345 | tr A0A024 | tr A0A024RCA7 A0A024RCA7_HUMAN | Ribc               |
| 0,429685 | 0,627862 | -0,24755 | -0,63085 | sp P05556 | sp P05556 ITB1_HUMAN           | Integrin beta-1 OS |
| 0,956052 | 0,975959 | 0,016607 | 0,042684 | sp P06396 | sp P06396 GELS_HUMAN           | Gelsolin OS=Hom    |
| 0,599045 | 0,702931 | 0,329946 | 0,474988 | tr B2R4M6 | tr B2R4M6 B2R4M6_HUMAN         | Protein S100       |
| 0,126842 | 0,2925   | 0,645719 | 1,390192 | tr R4GN98 | tr R4GN98 R4GN98_HUMAN         | Protein S100 (     |
| 0,125746 | 0,282936 | 0,679073 | 1,40899  | sp P06733 | sp P06733 ENOA_HUMAN           | Alpha-enolase O    |
| 0,439854 | 0,615898 | 0,327084 | 0,660132 | tr A0A2U3 | tr A0A2U3TZU2 A0A2U3TZU2_HUMAN | Gluc               |
| 0,18672  | 0,383766 | 0,381137 | 1,0714   | tr A0A0S2 | tr A0A0S2Z4G7 A0A0S2Z4G7_HUMAN | Nucl               |
| 0,411835 | 0,5064   | 1,847633 | 0,841594 | sp P06753 | sp P06753-3 TPM3_HUMAN         | Isoform 3 of Tr    |
| 0,318456 | 0,407234 | -2,21274 | -1,03679 | tr B4DMR3 | tr B4DMR3 B4DMR3_HUMAN         | cDNA FLJ518        |
| 0,318153 | 0,513831 | 0,313011 | 0,80764  | tr A0A5F9 | tr A0A5F9ZHM4 A0A5F9ZHM4_HUMAN | L-l                |
| 0,85949  | 0,92038  | 0,048272 | 0,133627 | sp P07237 | sp P07237 PDIA1_HUMAN          | Protein disulfide  |
| 0,89849  | 0,950083 | -0,02473 | -0,08651 | sp P07339 | sp P07339 CATD_HUMAN           | Cathepsin D OS=    |
| 0,03123  | 0,174448 | 0,549093 | 1,853687 | sp P07355 | sp P07355 ANXA2_HUMAN          | Annexin A2 OS=     |
| 0,480463 | 0,694726 | -0,1592  | -0,51078 | tr Q53FJ5 | tr Q53FJ5 Q53FJ5_HUMAN         | Prosaposin (Var    |
| 0,481455 | 0,581708 | 1,07314  | 0,701262 | tr Q5T8F0 | tr Q5T8F0 Q5T8F0_HUMAN         | Cathepsin L1 O     |
| 0,864072 | 0,921923 | 0,045274 | 0,128115 | sp P07737 | sp P07737 PROF1_HUMAN          | Profilin-1 OS=H    |
| 0,052141 | 0,156258 | 0,943094 | 1,923344 | sp P07858 | sp P07858 CATB_HUMAN           | Cathepsin B OS=    |
| 0,589343 | 0,753474 | -0,11486 | -0,38097 | sp P07942 | sp P07942 LAMB1_HUMAN          | Laminin subuni     |
| 0,349124 | 0,614935 | 0,182549 | 0,652448 | sp P07996 | sp P07996 TSP1_HUMAN           | Thrombospondin     |
| 0,238923 | 0,411833 | 0,467437 | 1,021681 | tr A0A024 | tr A0A024RD80 A0A024RD80_HUMAN | Hea                |
| 0,001075 | 0,014154 | -0,77643 | -3,34502 | tr Q53H39 | tr Q53H39 Q53H39_HUMAN         | Activin beta-A     |
| 0,003054 | 0,02887  | -0,80415 | -2,99913 | tr A0A024 | tr A0A024RDW8 A0A024RDW8_HUMAN | Cc                 |
| 0,746212 | 0,83218  | 0,111631 | 0,25999  | sp P08581 | sp P08581-2 MET_HUMAN          | Isoform 2 of He    |
| 0,066441 | 0,151793 | 1,635481 | 1,969362 | tr Q53HU8 | tr Q53HU8 Q53HU8_HUMAN         | Vimentin (Fra      |
| 0,018902 | 0,105333 | 0,735286 | 2,223454 | tr V9HWE0 | tr V9HWE0 V9HWE0_HUMAN         | Annexin OS=        |
| 0,218288 | 0,3339   | -0,90572 | -1,19371 | tr A8MX94 | tr A8MX94 A8MX94_HUMAN         | GST class-pi C     |
| 0,598442 | 0,706087 | -0,3454  | -0,47877 | sp P09341 | sp P09341 GROA_HUMAN           | Growth-regulate    |
| 0,698267 | 0,766518 | -0,3146  | -0,36022 | tr A0A384 | tr A0A384MR27 A0A384MR27_HUMAN | Ga                 |
| 0,706926 | 0,869358 | 0,047684 | 0,215858 | sp P09486 | sp P09486 SPRC_HUMAN           | SPARC OS=Homo      |
| 0,014785 | 0,089538 | 0,819217 | 2,394772 | tr F8WCZ6 | tr F8WCZ6 F8WCZ6_HUMAN         | Complement (       |
| 0,392658 | 0,578894 | -0,32041 | -0,71527 | tr Q59EM9 | tr Q59EM9 Q59EM9_HUMAN         | Ubiquitin C v      |
| 0,427411 | 0,614558 | -0,29183 | -0,65888 | sp Q01105 | sp Q01105-3 SET_HUMAN          | Isoform 3 of Pro   |

|          |          |          |          |           |                                |                     |
|----------|----------|----------|----------|-----------|--------------------------------|---------------------|
| 0,158578 | 0,304302 | 0,709874 | 1,312189 | tr A0A0G2 | tr A0A0G2JIW1 A0A0G2JIW1_HUMAN | Heat                |
| 0,085664 | 0,226744 | 0,631066 | 1,550113 | tr B4DJ51 | tr B4DJ51 B4DJ51_HUMAN         | Calmodulin OS=      |
| 0,034087 | 0,237747 | -0,3462  | -1,52705 | sp P10586 | sp P10586-2 PTPRF_HUMAN        | Isoform 2 of R      |
| 0,865341 | 0,907214 | -0,13769 | -0,15683 | sp P10599 | sp P10599 THIO_HUMAN           | Thioredoxin OS=     |
| 0,021929 | 0,156984 | -0,51961 | -1,93001 | sp P11021 | sp P11021 BIP_HUMAN            | Endoplasmic reticu  |
| 0,545668 | 0,734727 | -0,11278 | -0,4084  | tr A0A024 | tr A0A024R972 A0A024R972_HUMAN | Lami                |
| 0,806626 | 0,884823 | 0,070149 | 0,187464 | sp P11142 | sp P11142 HSP7C_HUMAN          | Heat shock cogr     |
| 0,03328  | 0,107911 | -1,29135 | -2,26737 | tr A0A087 | tr A0A087X0S5 A0A087X0S5_HUMAN | Colla               |
| 0,429193 | 0,61499  | 0,289289 | 0,655505 | tr A0A024 | tr A0A024R694 A0A024R694_HUMAN | Alph                |
| 0,956032 | 0,982742 | 0,005518 | 0,028152 | tr B3GN61 | tr B3GN61 B3GN61_HUMAN         | Truncated E-c       |
| 0,709359 | 0,756498 | -0,81591 | -0,37305 | tr A6XNE3 | tr A6XNE3 A6XNE3_HUMAN         | Interferon gar      |
| 0,265581 | 0,424338 | 0,483749 | 0,979109 | tr A0A384 | tr A0A384N6H1 A0A384N6H1_HUMAN | Epi                 |
| 0,075818 | 0,18642  | -0,74895 | -1,66633 | tr A0A090 | tr A0A090N8Y2 A0A090N8Y2_HUMAN | Prot                |
| 0,215831 | 0,313286 | -1,47465 | -1,2647  | tr J3KPG2 | tr J3KPG2 J3KPG2_HUMAN         | Translationally-    |
| 0,009072 | 0,025895 | 1,824889 | 3,138353 | tr V9HWJ7 | tr V9HWJ7 V9HWJ7_HUMAN         | Epididymis se       |
| 0,56746  | 0,741107 | 0,128236 | 0,410976 | sp P13987 | sp P13987-2 CD59_HUMAN         | Isoform 2 of CD     |
| 0,147075 | 0,222024 | -2,65336 | -1,56622 | tr A0A0S2 | tr A0A0S2Z4A0 A0A0S2Z4A0_HUMAN | Prote               |
| 0,035521 | 0,106415 | -1,18047 | -2,19817 | sp P14543 | sp P14543-2 NID1_HUMAN         | Isoform 2 of Ni     |
| 0,507419 | 0,611663 | -0,78669 | -0,64676 | sp P14618 | sp P14618 KPYM_HUMAN           | Pyruvate kinase     |
| 0,388619 | 0,573095 | -0,30918 | -0,7145  | tr Q5CAQ5 | tr Q5CAQ5 Q5CAQ5_HUMAN         | Epididymis se       |
| 0,513925 | 0,614503 | 1,642651 | 0,66542  | tr B3KSS4 | tr B3KSS4 B3KSS4_HUMAN         | cDNA FLJ36858       |
| 0,355954 | 0,505402 | -0,47822 | -0,827   | tr B4DMM8 | tr B4DMM8 B4DMM8_HUMAN         | cDNA FLJ57          |
| 0,653664 | 0,729924 | 0,591667 | 0,437051 | tr B7Z5V2 | tr B7Z5V2 B7Z5V2_HUMAN         | cDNA FLJ54141       |
| 0,291675 | 0,42449  | -0,62346 | -0,9751  | sp P15514 | sp P15514 AREG_HUMAN           | Amphiregulin OS     |
| 0,00324  | 0,003667 | -1,49603 | -3,59101 | tr A0A024 | tr A0A024R8V7 A0A024R8V7_HUMAN | Met                 |
| 0,694538 | 0,774222 | 0,243108 | 0,352418 | sp P16070 | sp P16070 CD44_HUMAN           | CD44 antigen OS     |
| 0,131761 | 0,313658 | 0,470223 | 1,272221 | sp P16144 | sp P16144-5 ITB4_HUMAN         | Isoform Beta-4E     |
| 0,641214 | 0,754208 | 0,155025 | 0,372595 | sp P17900 | sp P17900 SAP3_HUMAN           | Ganglioside GM2     |
| 0,623698 | 0,703255 | -0,63639 | -0,4781  | tr A0A384 | tr A0A384NYN5 A0A384NYN5_HUMAN | Me                  |
| 0,532891 | 0,778961 | -0,07122 | -0,34294 | tr Q6FHU2 | tr Q6FHU2 Q6FHU2_HUMAN         | Phosphoglyce        |
| 0,029706 | 0,168188 | -0,56531 | -1,88875 | sp P19883 | sp P19883-2 FST_HUMAN          | Isoform 2 of Folli  |
| 0,000966 | 0,0088   | 2,989621 | 4,99568  | sp P19957 | sp P19957 ELAF_HUMAN           | Elafin OS=Homo s    |
| 0,550901 | 0,668822 | 0,529972 | 0,564392 | sp P20827 | sp P20827 EFNA1_HUMAN          | Ephrin-A1 OS=H      |
| 0,172346 | 0,344194 | 0,474299 | 1,167676 | tr Q60FE6 | tr Q60FE6 Q60FE6_HUMAN         | Filamin A OS=H      |
| 0,000671 | 0,0044   | -1,13602 | -4,10434 | tr E9PPJ5 | tr E9PPJ5 E9PPJ5_HUMAN         | Midkine (Fragme     |
| 0,037637 | 0,076865 | -3,237   | -2,45609 | sp P21810 | sp P21810 PGS1_HUMAN           | Biglycan OS=Horr    |
| 0,961708 | 0,976377 | -0,01515 | -0,03762 | tr B4DPP0 | tr B4DPP0 B4DPP0_HUMAN         | cDNA FLJ5103        |
| 0,987957 | 0,992252 | -0,00683 | -0,01279 | sp P22223 | sp P22223-2 CADH3_HUMAN        | Isoform 2 of C      |
| 0,856995 | 0,90706  | 0,085667 | 0,154238 | sp P22392 | sp P22392-2 NDKB_HUMAN         | Isoform 3 of N      |
| 0,337068 | 0,42344  | 1,990769 | 0,991223 | sp P22528 | sp P22528 SPR1B_HUMAN          | Cornifin-B OS=H     |
| 0,055077 | 0,10552  | -3,65809 | -2,23098 | sp P22692 | sp P22692 IBP4_HUMAN           | Insulin-like growth |
| 0,000248 | 0,0055   | -1,15084 | -4,62101 | tr B4DUV1 | tr B4DUV1 B4DUV1_HUMAN         | Fibulin-1 OS=I      |
| 0,369593 | 0,575243 | -0,28418 | -0,72306 | sp P23229 | sp P23229-4 ITA6_HUMAN         | Isoform Alpha-6     |
| 0,636814 | 0,738453 | -0,23455 | -0,41016 | tr V9HWC6 | tr V9HWC6 V9HWC6_HUMAN         | Peptidyl-pro        |
| 0,280111 | 0,453129 | 0,399214 | 0,914916 | tr E9PK25 | tr E9PK25 E9PK25_HUMAN         | Cofilin, non-mu     |
| 0,312834 | 0,419537 | -1,16317 | -1,00634 | sp P24821 | sp P24821 TENA_HUMAN           | Tenascin OS=Hor     |
| 0,542097 | 0,676649 | -0,29718 | -0,53075 | sp P25391 | sp P25391 LAMA1_HUMAN          | Laminin subuni      |
| 0,119789 | 0,191949 | 2,250046 | 1,677741 | sp P25788 | sp P25788-2 PSA3_HUMAN         | Isoform 2 of Pr     |
| 0,266826 | 0,410797 | -0,63167 | -1,02533 | sp P25789 | sp P25789-2 PSA4_HUMAN         | Isoform 2 of Pr     |
| 0,020636 | 0,043143 | 3,240671 | 2,844386 | tr Q59F03 | tr Q59F03 Q59F03_HUMAN         | Integrin alpha :    |

|          |          |          |          |                                                 |
|----------|----------|----------|----------|-------------------------------------------------|
| 0,629394 | 0,736033 | -0,21195 | -0,40997 | tr V9HWC0 V9HWC0 V9HWC0_HUMAN Epididymis l      |
| 0,9456   | 0,968272 | 0,025165 | 0,05546  | tr Q53G71 Q53G71 Q53G71_HUMAN Calreticulin va   |
| 0,187596 | 0,301037 | 1,082535 | 1,30734  | sp P27930 P27930 IL1R2_HUMAN Interleukin-1 rec  |
| 0,002483 | 0,004    | 1,714172 | 3,863522 | tr Q5U0A0 Q5U0A0 Q5U0A0_HUMAN Proteasome s      |
| 0,5545   | 0,753694 | 0,095943 | 0,378748 | sp P28799 P28799 GRN_HUMAN Progranulin OS=H     |
| 0,213708 | 0,376441 | 0,493003 | 1,084706 | sp P29034 P29034 S10A2_HUMAN Protein S100-A2    |
| 0,404654 | 0,508139 | -1,08154 | -0,82764 | sp P29317 P29317-2 EPHA2_HUMAN Isoform 2 of E   |
| 0,003263 | 0,037333 | 0,785824 | 2,948189 | tr V9HWD9 V9HWD9 V9HWD9_HUMAN Epididymis l      |
| 0,811699 | 0,875362 | 0,097795 | 0,198438 | tr D9IAI1 D9IAI1 D9IAI1_HUMAN Epididymis secret |
| 0,18155  | 0,391453 | -0,35205 | -1,05721 | tr B3KQT9 B3KQT9 B3KQT9_HUMAN Protein disulfic  |
| 0,093288 | 0,169314 | -2,23153 | -1,82985 | sp P30530 P30530 UFO_HUMAN Tyrosine-protein k   |
| 0,226332 | 0,349576 | -0,68009 | -1,12499 | sp P31431 P31431-2 SDC4_HUMAN Isoform 2 of Sy   |
| 0,535873 | 0,675908 | 0,333885 | 0,548604 | tr B4DP51 B4DP51 B4DP51_HUMAN cDNA FLJ5453      |
| 0,928952 | 0,960096 | -0,03757 | -0,07453 | sp P31946 P31946-2 1433B_HUMAN Isoform Short    |
| 0,641987 | 0,799938 | 0,086371 | 0,31236  | sp P31947 P31947 1433S_HUMAN 14-3-3 protein s   |
| 0,060371 | 0,33362  | -0,24466 | -1,18784 | tr V9HWH9 V9HWH9 V9HWH9_HUMAN Protein S100      |
| 0,023377 | 0,09181  | -1,02557 | -2,3334  | sp P32004 P32004-3 L1CAM_HUMAN Isoform 3 of L   |
| 0,071149 | 0,321913 | -0,28311 | -1,23457 | tr A0A384NPH9 A0A384NPH9_HUMAN Gly              |
| 0,210849 | 0,291485 | 4,318131 | 1,356669 | sp P35408 P35408 PE2R4_HUMAN Prostaglandin E    |
| 6,31E-05 | 0        | 3,183593 | 7,523012 | sp P35442 P35442 TSP2_HUMAN Thrombospondin      |
| 0,189466 | 0,302691 | 1,022416 | 1,29256  | sp P35556 P35556 FBN2_HUMAN Fibrillin-2 OS=Ho   |
| 0,685929 | 0,791172 | 0,141559 | 0,326632 | tr A0A024R1N1 A0A024R1N1_HUMAN Myc              |
| 0,004635 | 0,025867 | 1,220905 | 3,227093 | tr A0A024R2B6 A0A024R2B6_HUMAN Serp             |
| 0,713684 | 0,79528  | 0,158342 | 0,309543 | tr X6RJP6 X6RJP6 X6RJP6_HUMAN Transgelin-2 (Fr  |
| 4,62E-05 | 0        | -1,55537 | -6,23382 | tr D3DSM4 D3DSM4 D3DSM4_HUMAN Collagen, typ     |
| 0,00831  | 0,050897 | 0,969624 | 2,763653 | tr V9HWF2 V9HWF2 V9HWF2_HUMAN Malate dehy       |
| 0,559173 | 0,677104 | -0,38397 | -0,53246 | tr Q6P1N4 Q6P1N4 Q6P1N4_HUMAN IQGAP1 prote      |
| 0,997131 | 0,996318 | -0,00213 | -0,00319 | tr B1AK87 B1AK87 B1AK87_HUMAN F-actin-capping   |
| 0,026208 | 0,049125 | -3,87301 | -2,72592 | tr Q8NE89 Q8NE89 Q8NE89_HUMAN Similar to tiss   |
| 0,83707  | 0,890331 | -0,11298 | -0,18046 | sp P49327 P49327 FAS_HUMAN Fatty acid synthase  |
| 0,497292 | 0,608948 | 0,969762 | 0,672219 | tr Q6FH59 Q6FH59 Q6FH59_HUMAN VEGFC protein     |
| 0,686737 | 0,835727 | 0,071025 | 0,26528  | tr Q5SX91 Q5SX91 Q5SX91_HUMAN Rab GDP disso     |
| 0,723542 | 0,848506 | -0,06729 | -0,23906 | sp P50895 P50895 BCAM_HUMAN Basal cell adhesi   |
| 0,192926 | 0,328305 | 0,699677 | 1,212252 | tr J3KTF8 J3KTF8 J3KTF8_HUMAN Rho GDP-dissoci   |
| 0,001696 | 0,021556 | -0,76532 | -3,15908 | sp P52799 P52799 EFNB2_HUMAN Ephrin-B2 OS=H     |
| 1        | 1        | 0        | 0        | sp P53634 P53634 CATC_HUMAN Dipeptidyl peptid   |
| 0,190027 | 0,284344 | -3,25642 | -1,41332 | sp P55001 P55001-3 MFAP2_HUMAN Isoform B of I   |
| 0,775644 | 0,830045 | -0,1989  | -0,25928 | sp P55058 P55058 PLTP_HUMAN Phospholipid tran   |
| 0,031105 | 0,112582 | 0,915733 | 2,145181 | tr Q96IF9 Q96IF9 Q96IF9_HUMAN VCP protein (Fra  |
| 0,868919 | 0,908865 | -0,12118 | -0,1508  | sp P55145 P55145 MANF_HUMAN Mesencephalic       |
| 0,181197 | 0,358687 | 0,41957  | 1,111668 | sp P55268 P55268 LAMB2_HUMAN Laminin subuni     |
| 0,093507 | 0,169391 | -2,37711 | -1,83765 | sp P55290 P55290-5 CAD13_HUMAN Isoform 5 of C   |
| 0,083225 | 0,358256 | -0,24152 | -1,11632 | tr E9PJK1 E9PJK1 E9PJK1_HUMAN Tetraspanin OS=   |
| 0,272063 | 0,476843 | 0,328954 | 0,88419  | tr B4DUI5 B4DUI5 B4DUI5_HUMAN Triosephosphat    |
| 0,431865 | 0,575831 | 0,473395 | 0,715128 | tr G3V3I1 G3V3I1 G3V3I1_HUMAN Proteasome su     |
| 0,180506 | 0,486994 | -0,20471 | -0,87072 | sp P61769 P61769 B2MG_HUMAN Beta-2-microglo     |
| 0,024804 | 0,165778 | -0,47175 | -1,82436 | tr Q53HV6 Q53HV6 Q53HV6_HUMAN Epididymal se     |
| 0,022488 | 0,106696 | 0,880342 | 2,265666 | sp P61981 P61981 1433G_HUMAN 14-3-3 protein     |
| 0,016415 | 0,106    | 0,650204 | 2,188853 | sp P62258 P62258 1433E_HUMAN 14-3-3 protein e   |
| 0,58762  | 0,707966 | 0,24509  | 0,464257 | tr A2VCK8 A2VCK8 A2VCK8_HUMAN Thymosin beta     |

|          |          |          |          |           |                                |                     |
|----------|----------|----------|----------|-----------|--------------------------------|---------------------|
| 0,560481 | 0,680349 | -0,44763 | -0,54154 | tr Q0VAS5 | tr Q0VAS5 Q0VAS5_HUMAN         | Histone H4 OS       |
| 0,567725 | 0,67905  | 0,496645 | 0,538812 | sp P62937 | sp P62937 PPIA_HUMAN           | Peptidyl-prolyl cis |
| 0,165006 | 0,327829 | 0,532677 | 1,219037 | sp P62942 | sp P62942 FKB1A_HUMAN          | Peptidyl-prolyl c   |
| 0,615059 | 0,800856 | 0,077648 | 0,31504  | tr D0PNI1 | tr D0PNI1 D0PNI1_HUMAN         | Epididymis lumi     |
| 0,679991 | 0,784988 | -0,14749 | -0,33486 | tr B4DVQ0 | tr B4DVQ0 B4DVQ0_HUMAN         | cDNA FLJ5828        |
| 0,457242 | 0,561011 | -1,27186 | -0,74767 | sp P63313 | sp P63313 TYB10_HUMAN          | Thymosin beta-      |
| 0,000317 | 0,004889 | -1,07323 | -4,3736  | sp P78324 | sp P78324-2 SHPS1_HUMAN        | Isoform 2 of T      |
| 0,015704 | 0,077333 | -0,95299 | -2,4706  | sp P78504 | sp P78504 JAG1_HUMAN           | Protein jagged-1    |
| 0,000585 | 0,006286 | 1,625356 | 4,690488 | sp P80188 | sp P80188 NGAL_HUMAN           | Neutrophil gelati   |
| 0,02168  | 0,044741 | -3,86098 | -2,85194 | tr E9PKG6 | tr E9PKG6 E9PKG6_HUMAN         | Nucleobindin-2      |
| 0,806291 | 0,868118 | -0,13383 | -0,2151  | tr Q86V58 | tr Q86V58 Q86V58_HUMAN         | Fibulin 2 OS=H      |
| 0,130072 | 0,45561  | -0,18974 | -0,91129 | sp P98172 | sp P98172 EFNB1_HUMAN          | Ephrin-B1 OS=H      |
| 0,16215  | 0,288941 | 0,904614 | 1,354864 | tr Q5T0R7 | tr Q5T0R7 Q5T0R7_HUMAN         | Adenylyl cyclase    |
| 0,56823  | 0,697737 | -0,26546 | -0,49176 | tr Q7RTW3 | tr Q7RTW3 Q7RTW3_HUMAN         | Neuregulin 1        |
| 0,399056 | 0,581419 | -0,34333 | -0,71786 | sp Q02388 | sp Q02388 CO7A1_HUMAN          | Collagen alpha-     |
| 0,321094 | 0,425086 | -1,12296 | -0,98633 | tr B4DGN8 | tr B4DGN8 B4DGN8_HUMAN         | Procollagen-1       |
| 0,136929 | 0,285263 | -0,77067 | -1,40367 | sp Q02818 | sp Q02818 NUCB1_HUMAN          | Nucleobindin-1      |
| 0,242557 | 0,468194 | 0,289097 | 0,894899 | tr A0A024 | tr A0A024R3N3 A0A024R3N3_HUMAN | Amyloid             |
| 0,120882 | 0,424366 | 0,21564  | 0,982962 | tr A0A384 | tr A0A384NPQ2 A0A384NPQ2_HUMAN | Epi                 |
| 0,229604 | 0,417131 | 0,420208 | 1,014423 | tr A6NCT7 | tr A6NCT7 A6NCT7_HUMAN         | Collagen alpha      |
| 0,564846 | 0,732114 | -0,12383 | -0,40824 | sp Q08345 | sp Q08345-5 DDR1_HUMAN         | Isoform 4 of E      |
| 0,119272 | 0,343877 | -0,30859 | -1,14325 | tr A0A0S2 | tr A0A0S2Z3Y1 A0A0S2Z3Y1_HUMAN | Galec               |
| 0,210309 | 0,304147 | -1,68915 | -1,29504 | tr G3V1S6 | tr G3V1S6 G3V1S6_HUMAN         | Polypeptide N-      |
| 0,006421 | 0,03792  | 1,028663 | 2,926995 | tr Q59G97 | tr Q59G97 Q59G97_HUMAN         | EGF-containin       |
| 0,051308 | 0,250711 | -0,3861  | -1,49058 | sp Q12841 | sp Q12841 FSTL1_HUMAN          | Follistatin-relate  |
| 0,405524 | 0,504273 | 0,974311 | 0,819251 | sp Q12860 | sp Q12860-2 CNTN1_HUMAN        | Isoform 2 of        |
| 0,021902 | 0,087902 | 1,028987 | 2,365388 | tr C9J4H5 | tr C9J4H5 C9J4H5_HUMAN         | Semaphorin-3F       |
| 0,725712 | 0,82984  | 0,10561  | 0,272746 | tr Q59FV9 | tr Q59FV9 Q59FV9_HUMAN         | PTK7 protein t      |
| 0,084112 | 0,159525 | -3,0365  | -1,9362  | tr H3BR90 | tr H3BR90 H3BR90_HUMAN         | Mesothelin (Fr      |
| 0,640813 | 0,701573 | -1,07826 | -0,46969 | tr F8WC54 | tr F8WC54 F8WC54_HUMAN         | Disintegrin an      |
| 0,222151 | 0,420779 | 0,371758 | 0,996735 | tr A0A0S2 | tr A0A0S2Z3R6 A0A0S2Z3R6_HUMAN | Lami                |
| 0,003797 | 0,027818 | -0,88861 | -3,01943 | sp Q13753 | sp Q13753 LAMC2_HUMAN          | Laminin subuni      |
| 0,151191 | 0,282348 | -1,03701 | -1,41935 | tr A0A024 | tr A0A024R2W4 A0A024R2W4_HUMAN | Alp                 |
| 0,850123 | 0,918261 | 0,047975 | 0,139794 | tr B4DZY7 | tr B4DZY7 B4DZY7_HUMAN         | cDNA FLJ57022       |
| 0,628432 | 0,778403 | -0,10761 | -0,34589 | sp Q14512 | sp Q14512 FGFP1_HUMAN          | Fibroblast grow     |
| 0,10582  | 0,288427 | -0,46114 | -1,34678 | tr G3V511 | tr G3V511 G3V511_HUMAN         | Latent-transfo      |
| 0,275225 | 0,42795  | 0,474051 | 0,957847 | sp Q15084 | sp Q15084-3 PDIA6_HUMAN        | Isoform 3 of P      |
| 0,921523 | 0,948194 | -0,09365 | -0,09258 | sp Q15149 | sp Q15149-7 PLEC_HUMAN         | Isoform 7 of Pl     |
| 0,899263 | 0,932322 | -0,08241 | -0,11381 | tr Q6SYC2 | tr Q6SYC2 Q6SYC2_HUMAN         | Poliovirus rece     |
| 0,972354 | 0,984282 | -0,01737 | -0,02991 | tr Q59EZ1 | tr Q59EZ1 Q59EZ1_HUMAN         | Protein tyrosin     |
| 0,349164 | 0,502296 | 0,518468 | 0,849001 | tr A0A0S2 | tr A0A0S2Z4Q2 A0A0S2Z4Q2_HUMAN | Tran                |
| 0,823204 | 0,907183 | 0,051346 | 0,160464 | sp Q16270 | sp Q16270 IBP7_HUMAN           | Insulin-like growt  |
| 0,810637 | 0,875171 | -0,10167 | -0,20091 | tr A0A140 | tr A0A140VJI7 A0A140VJI7_HUMAN | Testicu             |
| 0,019721 | 0,097395 | 0,866619 | 2,312279 | tr B3KTA3 | tr B3KTA3 B3KTA3_HUMAN         | Fascin OS=Horr      |
| 0,012283 | 0,103308 | -0,59771 | -2,22156 | sp Q16769 | sp Q16769 QPCT_HUMAN           | Glutaminyl-pept     |
| 0,055094 | 0,189519 | 0,570727 | 1,677424 | tr A0A0A6 | tr A0A0A6YYF2 A0A0A6YYF2_HUMAN | HCG                 |
| 0,050138 | 0,174215 | 0,783273 | 1,863287 | sp Q24JP5 | sp Q24JP5 T132A_HUMAN          | Transmembrane       |
| 1        | 1        | 0        | 0        | tr B4DTF2 | tr B4DTF2 B4DTF2_HUMAN         | Annexin OS=Hc       |
| 0,257563 | 0,343496 | -1,52522 | -1,15602 | sp Q6H3X3 | sp Q6H3X3 ULBP5_HUMAN          | UL-16 binding p     |
| 0,593792 | 0,677964 | -1,12261 | -0,53617 | tr A0A024 | tr A0A024R091 A0A024R091_HUMAN | von                 |



|          |          |          |          |           |                                             |
|----------|----------|----------|----------|-----------|---------------------------------------------|
| 0,006606 | 0,026286 | -1,17995 | -3,02393 | sp Q6UVK  | sp Q6UVK1 CSPG4_HUMAN Chondroitin su        |
| 0,163959 | 0,295636 | 0,946445 | 1,357964 | sp Q6YHK  | sp Q6YHK3-4 CD109_HUMAN Isoform 4 of        |
| 0,624134 | 0,730269 | -0,27342 | -0,43427 | tr B3KRK1 | tr B3KRK1 B3KRK1_HUMAN cDNA FLJ34442        |
| 0,188183 | 0,322584 | -0,76369 | -1,24298 | sp Q86X2  | sp Q86X29-6 LSR_HUMAN Isoform 6 of Lipc     |
| 0,303199 | 0,453342 | -0,51571 | -0,92417 | sp Q8IUX7 | sp Q8IUX7 AEBP1_HUMAN Adipocyte enha        |
| 0,282926 | 0,356859 | -1,89489 | -1,11018 | sp Q8IWU  | sp Q8IWU5-2 SULF2_HUMAN Isoform 2 of I      |
| 0,542278 | 0,659509 | -0,53666 | -0,57647 | sp Q8NBP  | sp Q8NBP7 PCSK9_HUMAN Proprotein con        |
| 0,406554 | 0,626392 | -0,21399 | -0,62975 | tr B7Z5C1 | tr B7Z5C1 B7Z5C1_HUMAN cDNA FLJ56126        |
| 0,184139 | 0,297654 | 1,160653 | 1,328773 | sp Q9252  | sp Q92520 FAM3C_HUMAN Protein FAM3C         |
| 0,934612 | 0,959329 | -0,04791 | -0,07258 | sp Q9262  | sp Q92626 PXD_N_HUMAN Peroxidasin hor       |
| 0,003061 | 0,040769 | -0,72736 | -2,8846  | sp Q9274  | sp Q92743 HTRA1_HUMAN Serine protease       |
| 0,009528 | 0,02425  | -2,21346 | -3,20553 | sp Q9282  | sp Q92823-5 NRCAM_HUMAN Isoform 5 of        |
| 0,41829  | 0,625971 | -0,22553 | -0,62725 | sp Q9289  | sp Q92896 GSLG1_HUMAN Golgi apparatus       |
| 0,124142 | 0,19841  | 1,812882 | 1,626779 | tr C9JMK5 | tr C9JMK5 C9JMK5_HUMAN Phosphoinosit        |
| 0,474604 | 0,58139  | 1,171906 | 0,716009 | tr V9HWC  | tr V9HWC2 V9HWC2_HUMAN Maillard deg         |
| 0,9403   | 0,965734 | -0,03245 | -0,06294 | tr B7Z4S8 | tr B7Z4S8 B7Z4S8_HUMAN Asparaginyl end      |
| 0,521299 | 0,655962 | 0,402622 | 0,582446 | sp Q9971  | sp Q99715-4 COCA1_HUMAN Isoform 4 of        |
| 0,006068 | 0,087368 | -0,57563 | -2,40861 | sp Q9998  | sp Q99985 SEM3C_HUMAN Semaphorin-3C         |
| 0,082093 | 0,184587 | 0,978343 | 1,719142 | tr A0A140 | tr A0A140VJY7 A0A140VJY7_HUMAN Thior        |
| 0,098662 | 0,262549 | -0,56593 | -1,45188 | sp Q9BRK  | sp Q9BRK5-4 CAB45_HUMAN Isoform 4 of        |
| 0,695855 | 0,852741 | 0,053686 | 0,232553 | sp Q9GZV  | sp Q9GZM7-3 TINAL_HUMAN Isoform 3 of        |
| 0,341855 | 0,422369 | 1,593416 | 0,969245 | sp Q9H29  | sp Q9H299 SH3L3_HUMAN SH3 domain-bir        |
| 0,809089 | 0,869436 | 0,131424 | 0,2118   | sp Q9NPR  | sp Q9NPR2-2 SEM4B_HUMAN Isoform 2 of        |
| 0,783335 | 0,833132 | 0,330984 | 0,264599 | tr F8VQN  | tr F8VQN3 F8VQN3_HUMAN Teneurin-2 OS        |
| 0,02329  | 0,1065   | 0,879547 | 2,250078 | tr Q4ZG85 | tr Q4ZG85 Q4ZG85_HUMAN Uncharacteriz        |
| 0,591832 | 0,733    | -0,17197 | -0,42592 | sp Q9P2B  | sp Q9P2B2 FPRP_HUMAN Prostaglandin F2       |
| 0,155429 | 0,42162  | -0,23834 | -0,96599 | sp Q9UBP  | sp Q9UBP4 DKK3_HUMAN Dickkopf-relatec       |
| 0,155691 | 0,29388  | -0,82888 | -1,35733 | tr Q5U00  | tr Q5U000 Q5U000_HUMAN Cathepsin X O        |
| 0,018537 | 0,049548 | 1,876957 | 2,735875 | tr B7Z5J4 | tr B7Z5J4 B7Z5J4_HUMAN Carboxypeptidas      |
| 0,199365 | 0,300082 | 2,442866 | 1,361716 | sp Q9UMI  | sp Q9UMD9-2 COHA1_HUMAN Isoform 2 o         |
| 0,342993 | 0,421769 | 1,844257 | 0,974972 | sp Q9UNN  | sp Q9UNN8 EPCR_HUMAN Endothelial prot       |
| 0,049114 | 0,139158 | -1,14654 | -2,02548 | tr A0A2I2 | tr A0A2I2MP48 A0A2I2MP48_HUMAN Kalli        |
| 0,44071  | 0,554144 | -0,91809 | -0,75733 | tr W6I206 | tr W6I206 W6I206_HUMAN Lysyl oxidase h      |
| 0,467897 | 0,565727 | 1,662973 | 0,740285 | tr B2RAF9 | tr B2RAF9 B2RAF9_HUMAN Suppressor of t      |
| 0,146478 | 0,319966 | 0,474093 | 1,233564 | tr D3DVF0 | tr D3DVF0 D3DVF0_HUMAN Junctional adh       |
| 0,355535 | 0,504709 | 0,460387 | 0,822131 | tr A0A024 | tr A0A024R462 A0A024R462_HUMAN Fibro        |
| 0,071141 | 0,188727 | 0,746922 | 1,693064 | tr W8GRM  | tr W8GRM7 W8GRM7_HUMAN Kallikrein 1         |
| 0,757685 | 0,811084 | 0,30479  | 0,292017 | tr A0A024 | tr A0A024R884 A0A024R884_HUMAN Tena         |
| 0,137473 | 0,508047 | -0,16297 | -0,83525 | tr A0A024 | tr A0A024RAB6 A0A024RAB6_HUMAN Hep          |
| 0,62689  | 0,70246  | -1,38106 | -0,49377 | tr D7RVA3 | tr D7RVA3 D7RVA3_HUMAN Granulocyte c        |
| 0,129345 | 0,18715  | -3,46463 | -1,67264 | tr A0A1V1 | tr A0A1V1IFQ2 A0A1V1IFQ2_HUMAN MHC          |
| 0,478832 | 0,578325 | -1,12927 | -0,70768 | tr A0A1D6 | tr A0A1D6ZNI8 A0A1D6ZNI8_HUMAN;tr A0A0S4XRM |
| 0,028866 | 0,056706 | -3,79818 | -2,65825 | tr A0A288 | tr A0A288Q9P9 A0A288Q9P9_HUMAN MH           |
| 0,371543 | 0,507209 | 0,607851 | 0,833224 | tr A0A384 | tr A0A384MR03 A0A384MR03_HUMAN Fib          |
| 0,368236 | 0,529955 | 0,416966 | 0,788755 | tr F5H2D0 | tr F5H2D0 F5H2D0_HUMAN Complement s         |
| 0,005931 | 0,049212 | 0,785157 | 2,72015  | tr A8K6T3 | tr A8K6T3 A8K6T3_HUMAN cDNA FLJ78674        |
| 0,807639 | 0,874    | 0,106332 | 0,205322 | tr D3DS13 | tr D3DS13 D3DS13_HUMAN Ribonuclease /       |
| 0,470325 | 0,70075  | 0,143357 | 0,501087 | tr B3KNN  | tr B3KNN9 B3KNN9_HUMAN Activated leuk       |
| 0,455734 | 0,673042 | 0,185544 | 0,5576   | tr B4E1B2 | tr B4E1B2 B4E1B2_HUMAN Beta-1 metal-b       |

|          |          |          |          |                                                  |                                        |
|----------|----------|----------|----------|--------------------------------------------------|----------------------------------------|
| 0,016053 | 0,104327 | -0,69654 | -2,24722 | tr B7Z507                                        | tr B7Z507 B7Z507_HUMAN cDNA FLJ51036   |
| 0,523705 | 0,624544 | 0,838384 | 0,626315 | tr C9JB55 tr C9JB55 C9JB55_HUMAN Serotransferrin |                                        |
| 0,323888 | 0,413239 | -2,26486 | -1,02586 | tr C9JVG0                                        | tr C9JVG0 C9JVG0_HUMAN Serotransferrin |
| 0,24122  | 0,419479 | 0,452244 | 1,009903 | tr E7ET40                                        | tr E7ET40 E7ET40_HUMAN Urokinase-type  |
| 0,148041 | 0,215762 | -3,70099 | -1,58848 | tr V5NQE0                                        | tr V5NQE0 V5NQE0_HUMAN MHC class I ar  |
| 0,922746 | 0,947306 | 0,212711 | 0,096535 | tr H0YBI8 tr H0YBI8 H0YBI8_HUMAN Vascular endoth |                                        |
| 0,000321 | 0,007333 | -1,43398 | -4,86586 | tr Q5M8T4                                        | tr Q5M8T4 Q5M8T4_HUMAN Connective ti   |

cytoskeletal 14 OS=Homo sapiens OX=9606 GN=KRT14 PE=1 SV=4;tr|A0A024R1X6|A0A024R1X6\_HUMAN|  
i7, highly similar to Keratin, type II cytoskeletal 6A OS=Homo sapiens OX=9606 PE=2 SV=1;sp|P02538

ytoskeletal 5 OS=Homo sapiens OX=9606 GN=KRT5 PE=1 SV=3;tr|B4E1T1|B4E1T1\_HUMAN cDNA FL1  
ytoskeletal 9 OS=Homo sapiens OX=9606 GN=KRT9 PE=1 SV=3;tr|K7EQQ3|K7EQQ3\_HUMAN Keratin,  
ytoskeletal 17 OS=Homo sapiens OX=9606 GN=KRT17 PE=1 SV=2;;tr|F5GWP8|F5GWP8\_HUMAN Keratin  
protein (Fragment) OS=Homo sapiens OX=9606 GN=C1 segment PE=4 SV=1;tr|Q5CZ94|Q5CZ94\_HUMAN  
uride intracellular channel protein OS=Homo sapiens OX=9606 PE=3 SV=1;tr|Q5SRT3|Q5SRT3\_HUMAN  
ase 1 OS=Homo sapiens OX=9606 GN=QSOX1 PE=1 SV=3;tr|A0A140VKE5|A0A140VKE5\_HUMAN Sulfatase  
dase OS=Homo sapiens OX=9606 GN=MANBA PE=1 SV=1;tr|B4DT18|B4DT18\_HUMAN Beta-mannosidase  
Agrin OS=Homo sapiens OX=9606 GN=AGRN;sp|O00468-7|AGRIN\_HUMAN Isoform 7 of Agrin OS=Homo sapiens  
Syntenin-1 OS=Homo sapiens OX=9606 GN=SDCBP;tr|G5EA09|G5EA09\_HUMAN Syndecan binding protein  
OS=Homo sapiens OX=9606 GN=CYR61 PE=1 SV=1;sp|O00622|CCN1\_HUMAN CCN family member 1 (Cell  
d metalloproteinase domain-containing protein 10 OS=Homo sapiens OX=9606 GN=ADAM10 PE=2 SV=1  
tory light chain MRCL3 variant (Fragment) OS=Homo sapiens OX=9606 PE=2 SV=1;sp|P19105|ML12A

ease inhibitor 1 OS=Homo sapiens OX=9606 GN=SPINT1 PE=1 SV=2;tr|H3BVD9|H3BVD9\_HUMAN Ku  
in alpha 4 isoform 1 (Fragment) OS=Homo sapiens OX=9606 GN=ACTN4 PE=2 SV=1;sp|O43707|ACT  
Protocadherin-7 OS=Homo sapiens OX=9606 GN=PCDH7;sp|O60245|PCDH7\_HUMAN Protocadherin  
pe 1-K OS=Homo sapiens OX=9606 GN=H2BC12 PE=1 SV=3;tr|A0A024RCJ9|A0A024RCJ9\_HUMAN Hi  
5, highly similar to Homo sapiens cathepsin L2 (CTSL2), mRNA OS=Homo sapiens OX=9606 PE=2 SV=1  
3, highly similar to WD repeat protein 1 OS=Homo sapiens OX=9606 PE=2 SV=1;sp|O75083-3|WDR1\_  
A OS=Homo sapiens OX=9606 GN=SEMA7A PE=1 SV=1;sp|O75326-2|SEM7A\_HUMAN Isoform 2 of Se  
lamin-B OS=Homo sapiens OX=9606 GN=FLNB;sp|O75369-9|FLNB\_HUMAN Isoform 9 of Filamin-B O  
rpin B7 OS=Homo sapiens OX=9606 GN=SERPINB7;sp|O75635|SPB7\_HUMAN Serpin B7 OS=Homo s  
L, highly similar to Attractin OS=Homo sapiens OX=9606 PE=2 SV=1;sp|O75882-3|ATRN\_HUMAN Isof  
4 fis, clone MAMMA1002485, highly similar to Stanniocalcin-2 OS=Homo sapiens OX=9606 PE=2 SV=1  
rotein 1 OS=Homo sapiens OX=9606 GN=DKK1 PE=2 SV=1;sp|O94907|DKK1\_HUMAN Dickkopf-relat

48 fis, clone NT2RP2000028, highly similar to Serine protease 23 OS=Homo sapiens OX=9606 PE=2 SV=1;tr|B2RBR3|B2RBR3\_HUMAN protein DKFZp686D0114 OS=Homo sapiens OX=9606 GN=DKFZp686D0114 PE=4 SV=1;tr|B2RBR3|B2RBR3\_HUMAN  
ollistatin-related protein 3 OS=Homo sapiens OX=9606 GN=FSTL3;tr|A0A024R1Y8|A0A024R1Y8\_HUMAN  
hydrogenase OS=Homo sapiens OX=9606 GN=HEL-S-133P PE=2 SV=1;sp|P00338|LDHA\_HUMAN L-lactate  
otransferase OS=Homo sapiens OX=9606 PE=2 SV=1;sp|P00505-2|AATM\_HUMAN Isoform 2 of Aspartate  
osphoglycerate kinase 1 OS=Homo sapiens OX=9606 GN=PGK1;tr|V9HWF4|V9HWF4\_HUMAN Phosphoglycerate  
timator OS=Homo sapiens OX=9606 GN=PLAT PE=2 SV=1;sp|P00750|TPA\_HUMAN Tissue-type plasminogen  
5=Homo sapiens OX=9606 GN=HEL-S-62p PE=2 SV=1;sp|P01024|CO3\_HUMAN Complement C3 OS=Homo sapiens  
nase inhibitor 1 OS=Homo sapiens OX=9606 GN=TIMP1 PE=1 SV=1;tr|Q6FGX5|Q6FGX5\_HUMAN Metalloproteinase  
ymis secretory protein Li 2 OS=Homo sapiens OX=9606 GN=HEL-S-2 PE=2 SV=1;sp|P01034|CYTC\_HUMAN  
lipoprotein receptor OS=Homo sapiens OX=9606 GN=LDLR PE=1 SV=1;tr|Q9UH51|Q9UH51\_HUMAN Low-density  
ent) OS=Homo sapiens OX=9606 GN=INS PE=2 SV=1;tr|A6XGL2|A6XGL2\_HUMAN Insulin OS=Homo sapiens  
cappa constant OS=Homo sapiens OX=9606 GN=IGKC PE=1 SV=2;tr|A0A5H1ZRQ3|A0A5H1ZRQ3\_HUMAN  
0 fis, clone MAMMA1000370, highly similar to Ig alpha-1 chain C region OS=Homo sapiens OX=9606  
n alpha 1 (Fragment) OS=Homo sapiens OX=9606 PE=2 SV=1;tr|A0A3B3ISV3|A0A3B3ISV3\_HUMAN C  
5=Homo sapiens OX=9606 GN=LMNA PE=1 SV=1;tr|A0A384MQX1|A0A384MQX1\_HUMAN Epididymal  
ipoprotein E isoform 1 (Fragment) OS=Homo sapiens OX=9606 GN=APOE PE=2 SV=1;sp|P02649|APOE

omo sapiens OX=9606 GN=FN1 PE=1 SV=5;sp|P02751-7|FINC\_HUMAN Isoform 7 of Fibronectin OS=  
=Homo sapiens OX=9606 GN=GC PE=1 SV=1;sp|P02774-2|VTDB\_HUMAN Isoform 2 of Vitamin D-bind  
S=Homo sapiens OX=9606 GN=TF PE=1 SV=3;tr|Q06AH7|Q06AH7\_HUMAN Beta-1 metal-binding glo

proteinase 1 (Interstitial collagenase) OS=Homo sapiens OX=9606 PE=2 SV=1;tr|Q53G96|Q53G96\_H  
Fructose-bisphosphate aldolase A OS=Homo sapiens OX=9606 GN=ALDOA;tr|V9HWN7|V9HWN7\_HL  
OS=Homo sapiens OX=9606 GN=CSTB PE=2 SV=1;sp|P04080|CYTB\_HUMAN Cystatin-B OS=Homo sap  
=Homo sapiens OX=9606 GN=ANXA1 PE=1 SV=2;tr|Q5TZZ9|Q5TZZ9\_HUMAN Annexin OS=Homo sap  
otein OS=Homo sapiens OX=9606 GN=PRNP PE=3 SV=2;tr|Q86XR1|Q86XR1\_HUMAN Major prion pr  
OS=Homo sapiens OX=9606 GN=KRT1 PE=3 SV=1;tr|H6VRG0|H6VRG0\_HUMAN Cytokeratin-1 OS=H  
-3-phosphate dehydrogenase OS=Homo sapiens OX=9606 GN=GAPDH PE=1 SV=1;sp|P04406-2|G3P  
tone H2A OS=Homo sapiens OX=9606 PE=3 SV=1;sp|Q96KK5|H2A1H\_HUMAN Histone H2A type 1-H  
of Amyloid-beta precursor protein OS=Homo sapiens OX=9606 GN=APP;sp|P05067|A4\_HUMAN Amy

4, highly similar to Homo sapiens serpin peptidase inhibitor, clade B (ovalbumin), member 2 (SERPINI  
in peptidase inhibitor, clade E (Nexin, plasminogen activator inhibitor type 1), member 1, isoform CF  
in peptidase inhibitor clade G member 1 OS=Homo sapiens OX=9606 GN=SERPING1 PE=2 SV=1;sp|P  
osomal protein, large, P2, isoform CRA\_a OS=Homo sapiens OX=9606 GN=RPLP2 PE=3 SV=1;sp|P0538  
=Homo sapiens OX=9606 GN=ITGB1 PE=1 SV=2;sp|P05556-2|ITB1\_HUMAN Isoform 2 of Integrin be  
o sapiens OX=9606 GN=GSN PE=1 SV=1;sp|P06396-2|GELS\_HUMAN Isoform 2 of Gelsolin OS=Homo  
OS=Homo sapiens OX=9606 PE=2 SV=1;sp|P06702|S10A9\_HUMAN Protein S100-A9 OS=Homo sapie  
(Fragment) OS=Homo sapiens OX=9606 GN=S100A6 PE=1 SV=1;sp|P06703|S10A6\_HUMAN Protein S  
S=Homo sapiens OX=9606 GN=ENO1 PE=1 SV=2;tr|A0A024R4F1|A0A024R4F1\_HUMAN 2-phospho-L  
cose-6-phosphate isomerase OS=Homo sapiens OX=9606 GN=GPI PE=1 SV=1;sp|P06744-2|G6PI\_HU  
eophosmin (Fragment) OS=Homo sapiens OX=9606 GN=NPM1 PE=2 SV=1;sp|P06748-2|NPM\_HUM/  
ropomyosin alpha-3 chain OS=Homo sapiens OX=9606 GN=TPM3;tr|A0A087WWU8|A0A087WWU8\_  
96, highly similar to Glia-derived nexin OS=Homo sapiens OX=9606 PE=2 SV=1;tr|A0A024R498|A0AC  
actate dehydrogenase OS=Homo sapiens OX=9606 GN=LDHB PE=1 SV=1;sp|P07195|LDHB\_HUMAN L  
-isomerase OS=Homo sapiens OX=9606 GN=P4HB PE=1 SV=3;tr|A0A024R8S5|A0A024R8S5\_HUMAN  
Homo sapiens OX=9606 GN=CTSD PE=1 SV=1;tr|V9HWI3|V9HWI3\_HUMAN Cathepsin D OS=Homo si  
=Homo sapiens OX=9606 GN=ANXA2 PE=1 SV=2;tr|A0A024R5Z7|A0A024R5Z7\_HUMAN Annexin OS=  
iant Gaucher disease and variant metachromatic leukodystrophy) variant (Fragment) OS=Homo sapie  
S=Homo sapiens OX=9606 GN=CTSL PE=1 SV=1;tr|B3KQK4|B3KQK4\_HUMAN cDNA FLJ90619 fis, clo  
omo sapiens OX=9606 GN=PFN1 PE=1 SV=2;tr|K7EJ44|K7EJ44\_HUMAN Profilin OS=Homo sapiens O  
-Homo sapiens OX=9606 GN=CTSB PE=1 SV=3;tr|A0A024R374|A0A024R374\_HUMAN Cathepsin B OS=  
t beta-1 OS=Homo sapiens OX=9606 GN=LAMB1 PE=1 SV=2;tr|G3XAI2|G3XAI2\_HUMAN Laminin suk  
-1 OS=Homo sapiens OX=9606 GN=THBS1 PE=1 SV=2;sp|P07996-2|TSP1\_HUMAN Isoform 2 of Thror  
t shock protein 90kDa alpha (Cytosolic), class B member 1, isoform CRA\_a OS=Homo sapiens OX=960  
chain (Fragment) OS=Homo sapiens OX=9606 PE=2 SV=1;tr|A4D1W7|A4D1W7\_HUMAN Activin bet  
ollagen, type IV, alpha 2, isoform CRA\_a OS=Homo sapiens OX=9606 GN=COL4A2 PE=4 SV=1;sp|P085  
patocyte growth factor receptor OS=Homo sapiens OX=9606 GN=MET;sp|P08581|MET\_HUMAN He  
gment) OS=Homo sapiens OX=9606 PE=2 SV=1;sp|P08670|VIME\_HUMAN Vimentin OS=Homo sapie  
Homo sapiens OX=9606 GN=HEL-S-7 PE=2 SV=1;sp|P08758|ANXA5\_HUMAN Annexin A5 OS=Homo s  
OS=Homo sapiens OX=9606 GN=GSTP1 PE=1 SV=1;tr|V9HWE9|V9HWE9\_HUMAN GST class-pi OS=Hc

lectin OS=Homo sapiens OX=9606 PE=2 SV=1;sp|P09382|LEG1\_HUMAN Galectin-1 OS=Homo sapier  
sapiens OX=9606 GN=SPARC PE=1 SV=1;tr|D3DQH8|D3DQH8\_HUMAN Osteonectin OS=Homo sapie  
C1s subcomponent OS=Homo sapiens OX=9606 GN=C1S PE=1 SV=1;tr|A0A087X232|A0A087X232\_H  
ariant (Fragment) OS=Homo sapiens OX=9606 PE=2 SV=1;sp|P62979|RS27A\_HUMAN Ubiquitin-40S  
tein SET OS=Homo sapiens OX=9606 GN=SET;tr|A0A0C4DFV9|A0A0C4DFV9\_HUMAN Protein SET OS

: shock 70 kDa protein 1B OS=Homo sapiens OX=9606 GN=HSPA1B PE=1 SV=1;sp|P0DMV8|HS71A\_HUMAN  
 :Homo sapiens OX=9606 GN=HEL-S-72 PE=2 SV=1;sp|P0DP23|CALM1\_HUMAN Calmodulin-1 OS=Homo sapiens  
 eceptor-type tyrosine-protein phosphatase F OS=Homo sapiens OX=9606 GN=PTPRF;sp|P10586|PTPRF\_HUMAN  
 :Homo sapiens OX=9606 GN=TXN PE=1 SV=3;tr|H9ZYJ2|H9ZYJ2\_HUMAN Thioredoxin OS=Homo sapiens  
 lum chaperone BiP OS=Homo sapiens OX=9606 GN=HSPA5 PE=1 SV=2;tr|V9HWP4|V9HWP4\_HUMAN  
 inin, gamma 1 (Formerly LAMB2), isoform CRA\_a OS=Homo sapiens OX=9606 GN=LAMC1 PE=4 SV=1  
 rate 71 kDa protein OS=Homo sapiens OX=9606 GN=HSPA8 PE=1 SV=1;tr|V9HW22|V9HW22\_HUMAN  
 gen alpha-1(VI) chain OS=Homo sapiens OX=9606 GN=COL6A1 PE=1 SV=1;tr|A0A384P5H7|A0A384P5H7\_HUMAN  
 a-actinin cytoskeletal isoform OS=Homo sapiens OX=9606 GN=ACTN1 PE=2 SV=1;sp|P12814|ACTN1\_HUMAN  
 adherin OS=Homo sapiens OX=9606 GN=CDH1 PE=2 SV=1;tr|D3XNU5|D3XNU5\_HUMAN E-cadherin  
 rama-inducible protein 30 preproprotein OS=Homo sapiens OX=9606 PE=2 SV=1;tr|A8K686|A8K686\_HUMAN  
 didymis secretory sperm binding protein OS=Homo sapiens OX=9606 PE=2 SV=1;tr|B4DPU3|B4DPU3\_HUMAN  
 :ein disulfide-isomerase A4 OS=Homo sapiens OX=9606 GN=ERP70 PE=2 SV=1;sp|P13667|PDIA4\_HUMAN  
 controlled tumor protein OS=Homo sapiens OX=9606 GN=TPT1 PE=1 SV=1;tr|E9PJF7|E9PJF7\_HUMAN  
 cretory protein Li 37 OS=Homo sapiens OX=9606 GN=HEL-S-37 PE=2 SV=1;tr|Q53FI1|Q53FI1\_HUMAN  
 359 glycoprotein OS=Homo sapiens OX=9606 GN=CD59;tr|E9PNW4|E9PNW4\_HUMAN CD59 glycoprotein  
 ein kinase C substrate 80K-H isoform 4 (Fragment) OS=Homo sapiens OX=9606 GN=PRKCSH PE=2 SV=1  
 dogen-1 OS=Homo sapiens OX=9606 GN=NID1;sp|P14543|NID1\_HUMAN Nidogen-1 OS=Homo sapiens  
 PKM OS=Homo sapiens OX=9606 GN=PKM PE=1 SV=4;tr|V9HWP8|V9HWP8\_HUMAN Pyruvate kinase  
 :cretory sperm binding protein OS=Homo sapiens OX=9606 GN=TRA1 PE=2 SV=1;tr|V9HWP2|V9HWP2\_HUMAN  
 fis, clone ASTRO2015185, highly similar to POLIOVIRUS RECEPTOR OS=Homo sapiens OX=9606 PE=2 SV=1  
 '328, highly similar to Beta-1,4-galactosyltransferase 1 OS=Homo sapiens OX=9606 PE=2 SV=1;tr|B7Z  
 ., highly similar to Ezrin OS=Homo sapiens OX=9606 PE=2 SV=1;tr|V9HW42|V9HW42\_HUMAN Epididymal  
 =Homo sapiens OX=9606 GN=AREG PE=1 SV=2;tr|D6RFX5|D6RFX5\_HUMAN Amphiregulin OS=Homo sapiens  
 alloproteinase inhibitor 2 OS=Homo sapiens OX=9606 GN=TIMP2 PE=3 SV=1;tr|A0A140VK57|A0A140VK57\_HUMAN  
 =Homo sapiens OX=9606 GN=CD44 PE=1 SV=3;sp|P16070-8|CD44\_HUMAN Isoform 8 of CD44 antigen  
 : of Integrin beta-4 OS=Homo sapiens OX=9606 GN=ITGB4;tr|Q59H46|Q59H46\_HUMAN Integrin beta-4  
 :  
 tavinculin OS=Homo sapiens OX=9606 PE=2 SV=1;tr|A0A024QZN4|A0A024QZN4\_HUMAN Metavinculin  
 :rate mutase (Fragment) OS=Homo sapiens OX=9606 GN=PGAM1 PE=2 SV=1;tr|Q6FHK8|Q6FHK8\_HUMAN  
 statin OS=Homo sapiens OX=9606 GN=FST;tr|A0A024QZU6|A0A024QZU6\_HUMAN Follistatin, isoform 1  
 :  
 lomo sapiens OX=9606 GN=EFNA1 PE=1 SV=2;tr|B2R7U1|B2R7U1\_HUMAN Ephrin RBD domain-containing  
 lomo sapiens OX=9606 GN=FLNA PE=2 SV=1;sp|P21333|FLNA\_HUMAN Filamin-A OS=Homo sapiens  
 ent) OS=Homo sapiens OX=9606 GN=MDK PE=1 SV=1;sp|P21741|MDK\_HUMAN Midkine OS=Homo sapiens  
 io sapiens OX=9606 GN=BGN PE=1 SV=2;tr|B4DNL4|B4DNL4\_HUMAN Biglycan OS=Homo sapiens OX=9606  
 2, highly similar to CD9 antigen OS=Homo sapiens OX=9606 PE=2 SV=1;tr|A6NNI4|A6NNI4\_HUMAN  
 Cadherin-3 OS=Homo sapiens OX=9606 GN=CDH3;sp|P22223|CDH3\_HUMAN Cadherin-3 OS=Homo sapiens  
 nucleoside diphosphate kinase B OS=Homo sapiens OX=9606 GN=NME2;tr|Q32Q12|Q32Q12\_HUMAN  
 omo sapiens OX=9606 GN=SPRR1B PE=1 SV=2;tr|Q2I377|Q2I377\_HUMAN Small proline rich protein  
 r factor-binding protein 4 OS=Homo sapiens OX=9606 GN=IGFBP4 PE=1 SV=2;tr|A0A024R1U8|A0A024R1U8\_HUMAN  
 :Homo sapiens OX=9606 PE=2 SV=1;sp|P23142-4|FBLN1\_HUMAN Isoform C of Fibulin-1 OS=Homo sapiens  
 iX2A of Integrin alpha-6 OS=Homo sapiens OX=9606 GN=ITGA6;sp|P23229-2|ITGA6\_HUMAN Isoform 2  
 lyl cis-trans isomerase OS=Homo sapiens OX=9606 GN=HEL-S-39 PE=2 SV=1;sp|P23284|PIIB\_HUMAN  
 scale isoform OS=Homo sapiens OX=9606 GN=CFL1 PE=1 SV=1;tr|E9PP50|E9PP50\_HUMAN Cofilin, non-phosphorylated  
 no sapiens OX=9606 GN=TNC PE=1 SV=3;sp|P24821-3|TENA\_HUMAN Isoform 3 of Tenascin OS=Homo sapiens  
 :  
 oteasome subunit alpha type-3 OS=Homo sapiens OX=9606 GN=PSMA3;tr|Q6IB71|Q6IB71\_HUMAN  
 oteasome subunit alpha type-4 OS=Homo sapiens OX=9606 GN=PSMA4;tr|H0YN18|H0YN18\_HUMAN  
 3 isoform b, variant (Fragment) OS=Homo sapiens OX=9606 PE=2 SV=1;tr|B4E0H8|B4E0H8\_HUMAN

iminal protein 70 OS=Homo sapiens OX=9606 GN=HEL70 PE=2 SV=1;sp|P26038|MOES\_HUMAN Mo  
 riant (Fragment) OS=Homo sapiens OX=9606 PE=2 SV=1;tr|V9HW88|V9HW88\_HUMAN Calreticulin  
 eptor type 2 OS=Homo sapiens OX=9606 GN=IL1R2 PE=1 SV=1;sp|P27930-2|IL1R2\_HUMAN Isoform  
 ubunit alpha type OS=Homo sapiens OX=9606 PE=2 SV=1;tr|A0A109NGN6|A0A109NGN6\_HUMAN F  
 omo sapiens OX=9606 GN=GRN PE=1 SV=2;tr|B4DJI2|B4DJI2\_HUMAN cDNA FLJ53342, highly similar  
 ! OS=Homo sapiens OX=9606 GN=S100A2 PE=1 SV=3;tr|R4GN49|R4GN49\_HUMAN Protein S100-A2  
 :phrin type-A receptor 2 OS=Homo sapiens OX=9606 GN=EPHA2;tr|A0A024QZA8|A0A024QZA8\_HUM  
 uminal protein 107 OS=Homo sapiens OX=9606 GN=HEL107 PE=2 SV=1;tr|Q53EM5|Q53EM5\_HUMA  
 tory protein Li 34 OS=Homo sapiens OX=9606 GN=HEL-S-34 PE=2 SV=1;sp|P30086|PEBP1\_HUMAN P  
 de-isomerase OS=Homo sapiens OX=9606 PE=2 SV=1;tr|B3KQT2|B3KQT2\_HUMAN Protein disulfide-  
 cinase receptor UFO OS=Homo sapiens OX=9606 GN=AXL PE=1 SV=4;sp|P30530-2|UFO\_HUMAN Isof  
 ndecan-4 OS=Homo sapiens OX=9606 GN=SDC4;sp|P31431|SDC4\_HUMAN Syndecan-4 OS=Homo sa  
 3, highly similar to Heterogeneous nuclear ribonucleoprotein H OS=Homo sapiens OX=9606 PE=2 SV=  
 of 14-3-3 protein beta/alpha OS=Homo sapiens OX=9606 GN=YWHAB;tr|V9HWD6|V9HWD6\_HUMA  
 igma OS=Homo sapiens OX=9606 GN=SFN PE=1 SV=1;sp|P31947-2|1433S\_HUMAN Isoform 2 of 14-3-  
 ) OS=Homo sapiens OX=9606 GN=HEL-S-43 PE=2 SV=1;tr|B2R5H0|B2R5H0\_HUMAN Protein S100 OS  
 Neural cell adhesion molecule L1 OS=Homo sapiens OX=9606 GN=L1CAM;sp|P32004-2|L1CAM\_HUN  
 pican-1 OS=Homo sapiens OX=9606 PE=2 SV=1;sp|P35052|GPC1\_HUMAN Glypican-1 OS=Homo sapi

-2 OS=Homo sapiens OX=9606 GN=THBS2 PE=1 SV=2;tr|A0A3B3ITK0|A0A3B3ITK0\_HUMAN Thrombo  
 mo sapiens OX=9606 GN=FBN2 PE=1 SV=3;tr|D6RJ13|D6RJ13\_HUMAN Fibrillin-2 OS=Homo sapiens O  
 ssin, heavy polypeptide 9, non-muscle, isoform CRA\_a OS=Homo sapiens OX=9606 GN=MYH9 PE=3 S  
 in peptidase inhibitor, clade B (Ovalbumin), member 5, isoform CRA\_b OS=Homo sapiens OX=9606 C  
 agment) OS=Homo sapiens OX=9606 GN=TAGLN2 PE=1 SV=1;tr|A0A384MTL2|A0A384MTL2\_HUMAI  
 e XVIII, alpha 1, isoform CRA\_d OS=Homo sapiens OX=9606 GN=COL18A1 PE=4 SV=1;sp|P39060-2|C  
 drogenase OS=Homo sapiens OX=9606 GN=HEL-S-32 PE=2 SV=1;sp|P40925|MDHC\_HUMAN Malate  
 in (Fragment) OS=Homo sapiens OX=9606 GN=IQGAP1 PE=2 SV=1;tr|A0A0J9YXZ5|A0A0J9YXZ5\_HUN  
 g protein subunit beta OS=Homo sapiens OX=9606 GN=CAPZB PE=1 SV=1;tr|B1AK85|B1AK85\_HUMA  
 e factor pathway inhibitor 2 (Fragment) OS=Homo sapiens OX=9606 PE=2 SV=1;sp|P48307-2|TFPI2\_  
 e OS=Homo sapiens OX=9606 GN=FASN PE=1 SV=3;tr|A0A0U1RQF0|A0A0U1RQF0\_HUMAN 3-hydro  
 i OS=Homo sapiens OX=9606 GN=VEGFC PE=2 SV=1;sp|P49767|VEGFC\_HUMAN Vascular endothelia  
 ciation inhibitor (Fragment) OS=Homo sapiens OX=9606 GN=GDI2 PE=1 SV=1;sp|P50395-2|GDIB\_HU  
 ion molecule OS=Homo sapiens OX=9606 GN=BCAM PE=1 SV=2;tr|A0A068W6H0|A0A068W6H0\_HU  
 ation inhibitor 1 (Fragment) OS=Homo sapiens OX=9606 GN=ARHGDIA PE=1 SV=8;tr|V9HWE8|V9HW

lase 1 OS=Homo sapiens OX=9606 GN=CTSC PE=1 SV=2;tr|B4DJQ8|B4DJQ8\_HUMAN Cathepsin C OS  
 Microfibrillar-associated protein 2 OS=Homo sapiens OX=9606 GN=MFAP2;sp|P55001-2|MFAP2\_HU  
 sfer protein OS=Homo sapiens OX=9606 GN=PLTP PE=1 SV=1;tr|B3KUE5|B3KUE5\_HUMAN Phospho  
 gment) OS=Homo sapiens OX=9606 GN=VCP PE=2 SV=2;tr|V9HW80|V9HW80\_HUMAN 15S Mg(2+)-  
 astrocyte-derived neurotrophic factor OS=Homo sapiens OX=9606 GN=MANF PE=1 SV=3;tr|A8K878|

Cadherin-13 OS=Homo sapiens OX=9606 GN=CDH13;sp|P55290|CAD13\_HUMAN Cadherin-13 OS=Hc  
 Homo sapiens OX=9606 GN=CD81 PE=1 SV=1;tr|E9PRJ8|E9PRJ8\_HUMAN Tetraspanin (Fragment) O  
 e isomerase OS=Homo sapiens OX=9606 PE=2 SV=1;tr|V9HWK1|V9HWK1\_HUMAN Triosephosphate  
 unit alpha type OS=Homo sapiens OX=9606 GN=PSMA6 PE=1 SV=1;tr|G3V295|G3V295\_HUMAN Pro  
 bulin OS=Homo sapiens OX=9606 GN=B2M PE=1 SV=1;tr|B4E0X1|B4E0X1\_HUMAN Beta-2-microglob  
 cretory protein E1 (Fragment) OS=Homo sapiens OX=9606 PE=2 SV=1;tr|A0A024R6C0|A0A024R6C0\_  
 gamma OS=Homo sapiens OX=9606 GN=YWHAG PE=1 SV=2;tr|B3KNB4|B3KNB4\_HUMAN cDNA FLJ1  
 epsilon OS=Homo sapiens OX=9606 GN=YWHAE PE=1 SV=1;tr|V9HW98|V9HW98\_HUMAN Epididymi  
 i OS=Homo sapiens OX=9606 GN=TMSB4X PE=2 SV=1;sp|P62328|TYB4\_HUMAN Thymosin beta-4 OS

i-Homo sapiens OX=9606 GN=HIST1H4H PE=2 SV=1;tr|B2R4R0|B2R4R0\_HUMAN Histone H4 OS=Hoi  
 -trans isomerase A OS=Homo sapiens OX=9606 GN=PPIA PE=1 SV=2;tr|A8K486|A8K486\_HUMAN Pe  
 is-trans isomerase FKBP1A OS=Homo sapiens OX=9606 GN=FKBP1A PE=1 SV=2;tr|Q5W0X3|Q5W0X  
 inal protein 4 OS=Homo sapiens OX=9606 GN=YWHAZ PE=2 SV=1;sp|P63104|1433Z\_HUMAN 14-3-3  
 36, highly similar to Actin, cytoplasmic 2 OS=Homo sapiens OX=9606 PE=2 SV=1;tr|B4E3A4|B4E3A4\_  
 10 OS=Homo sapiens OX=9606 GN=TMSB10 PE=1 SV=2;tr|D6W5K2|D6W5K2\_HUMAN Thymosin, be  
 yrosine-protein phosphatase non-receptor type substrate 1 OS=Homo sapiens OX=9606 GN=SIRPA;s  
 OS=Homo sapiens OX=9606 GN=JAG1 PE=1 SV=3;tr|B2R6U9|B2R6U9\_HUMAN Delta-like protein OS:  
 inase-associated lipocalin OS=Homo sapiens OX=9606 GN=LCN2 PE=1 SV=2;tr|B2ZDQ1|B2ZDQ1\_HUI  
 ? OS=Homo sapiens OX=9606 GN=NUCB2 PE=1 SV=2;sp|P80303-2|NUCB2\_HUMAN Isoform 2 of Nuc  
 lomo sapiens OX=9606 GN=FBLN2 PE=2 SV=1;sp|P98095|FBLN2\_HUMAN Fibulin-2 OS=Homo sapien

forming growth factor beta-binding protein 2 OS=Homo sapiens OX=9606 GN=LTBP2 PE=1 SV=1;tr|G3V  
 'rotein disulfide-isomerase A6 OS=Homo sapiens OX=9606 GN=PDIA6;tr|A0A384NPU5|A0A384NPU5  
 actin OS=Homo sapiens OX=9606 GN=PLEC;sp|Q15149-8|PLEC\_HUMAN Isoform 8 of Plectin OS=Hor  
 ptor-related 1 (Fragment) OS=Homo sapiens OX=9606 GN=PVRL1 PE=4 SV=1;sp|Q15223-3|NECT1\_f  
 e phosphatase, receptor type, K variant (Fragment) OS=Homo sapiens OX=9606 PE=2 SV=1;tr|B4DH  
 isforming growth factor-beta-induced protein ig-h3 (Fragment) OS=Homo sapiens OX=9606 GN=TGFE  
 h factor-binding protein 7 OS=Homo sapiens OX=9606 GN=IGFBP7 PE=1 SV=1;sp|Q16270-2|IBP7\_HU  
 llar tissue protein Li 61 OS=Homo sapiens OX=9606 PE=2 SV=1;sp|Q16610|ECM1\_HUMAN Extracell  
 o sapiens OX=9606 PE=2 SV=1;tr|A0A384MEG1|A0A384MEG1\_HUMAN Fascin OS=Homo sapiens O  
 ide cyclotransferase OS=Homo sapiens OX=9606 GN=QPCT PE=1 SV=1;sp|Q16769-2|QPCT\_HUMAN  
 1811249, isoform CRA\_e OS=Homo sapiens OX=9606 GN=LAMA3 PE=1 SV=1;sp|Q16787-1|LAMA3\_f  
 a protein 132A OS=Homo sapiens OX=9606 GN=TMEM132A PE=1 SV=1;sp|Q24JP5-2|T132A\_HUMAN  
 mo sapiens OX=9606 GN=ANXA8L1 PE=1 SV=1;sp|Q5VT79|AXA81\_HUMAN Annexin A8-like protein  
 rotein 5 OS=Homo sapiens OX=9606 GN=RAET1G PE=1 SV=1;sp|Q6H3X3-2|ULBP5\_HUMAN Isoform  
 Willebrand factor A domain containing 1, isoform CRA\_c OS=Homo sapiens OX=9606 GN=VWA1 PE=

CD109 antigen OS=Homo sapiens OX=9606 GN=CD109;sp|Q6YHK3|CD109\_HUMAN CD109 antigen C  
 ! fis, clone HLUNG2001507, highly similar to Amphoterin-induced protein 2 OS=Homo sapiens OX=96  
 olysis-stimulated lipoprotein receptor OS=Homo sapiens OX=9606 GN=LSR;sp|Q86X29-5|LSR\_HUMA  
 ncer-binding protein 1 OS=Homo sapiens OX=9606 GN=AEBP1 PE=1 SV=1;tr|B4DJB3|B4DJB3\_HUMA  
 Extracellular sulfatase Sulf-2 OS=Homo sapiens OX=9606 GN=SULF2;sp|Q8IWU5|SULF2\_HUMAN Ext  
 vertase subtilisin/kexin type 9 OS=Homo sapiens OX=9606 GN=PCSK9 PE=1 SV=3;tr|A0A669KBG0|AC  
 , highly similar to Programmed cell death 6-interacting protein OS=Homo sapiens OX=9606 PE=2 SV=  
 OS=Homo sapiens OX=9606 GN=FAM3C PE=1 SV=1;tr|C9JP35|C9JP35\_HUMAN Protein FAM3C (Fra  
 nolog OS=Homo sapiens OX=9606 GN=PXD1 PE=1 SV=2;tr|H7C1W1|H7C1W1\_HUMAN Peroxidase h  
 e HTRA1 OS=Homo sapiens OX=9606 GN=HTRA1 PE=1 SV=1;tr|Q05DJ8|Q05DJ8\_HUMAN HTRA1 prot  
 Neuronal cell adhesion molecule OS=Homo sapiens OX=9606 GN=NRCAM;sp|Q92823-3|NRCAM\_HI  
 ; protein 1 OS=Homo sapiens OX=9606 GN=GLG1 PE=1 SV=2;sp|Q92896-3|GSLG1\_HUMAN Isoform  
 ide-3-kinase-interacting protein 1 (Fragment) OS=Homo sapiens OX=9606 GN=PIK3IP1 PE=1 SV=8;sp  
 lycase OS=Homo sapiens OX=9606 GN=HEL-S-67p PE=2 SV=1;sp|Q99497|PARK7\_HUMAN Parkinson  
 lopeptidase OS=Homo sapiens OX=9606 PE=2 SV=1;tr|Q6I9U9|Q6I9U9\_HUMAN Asparaginyl endope  
 Collagen alpha-1(XII) chain OS=Homo sapiens OX=9606 GN=COL12A1;tr|D6RGG3|D6RGG3\_HUMAN  
 OS=Homo sapiens OX=9606 GN=SEMA3C PE=2 SV=2;tr|B4E2I9|B4E2I9\_HUMAN Semaphorin-3C OS  
 edoxin domain-containing protein 17 OS=Homo sapiens OX=9606 PE=2 SV=1;sp|Q9BRA2|TXD17\_HU  
 45 kDa calcium-binding protein OS=Homo sapiens OX=9606 GN=SDF4;tr|G3V1E2|G3V1E2\_HUMAN 4  
 Tubulointerstitial nephritis antigen-like OS=Homo sapiens OX=9606 GN=TINAGL1;sp|Q9GZM7|TINAL  
 nding glutamic acid-rich-like protein 3 OS=Homo sapiens OX=9606 GN=SH3BGL3 PE=1 SV=1;tr|Q86Z  
 Semaphorin-4B OS=Homo sapiens OX=9606 GN=SEMA4B;sp|Q9NPR2|SEM4B\_HUMAN Semaphorin  
 OS=Homo sapiens OX=9606 GN=TENM2 PE=1 SV=1;sp|Q9NT68-2|TEN2\_HUMAN Isoform 2 of Teneurin  
 ed protein CRIM1 (Fragment) OS=Homo sapiens OX=9606 GN=CRIM1 PE=4 SV=1;sp|Q9NZV1|CRIM1  
 receptor negative regulator OS=Homo sapiens OX=9606 GN=PTGFRN PE=1 SV=2;tr|Q1WWL2|Q1WW  
 l protein 3 OS=Homo sapiens OX=9606 GN=DKK3 PE=1 SV=2;tr|F6SYF8|F6SYF8\_HUMAN Dickkopf-re  
 S=Homo sapiens OX=9606 PE=2 SV=1;sp|Q9UBR2|CATZ\_HUMAN Cathepsin Z OS=Homo sapiens OX:  
 se A4 OS=Homo sapiens OX=9606 GN=CPA4 PE=1 SV=1;sp|Q9UI42-2|CBPA4\_HUMAN Isoform 2 of C  
 f Collagen alpha-1(XVII) chain OS=Homo sapiens OX=9606 GN=COL17A1;tr|D3DRA2|D3DRA2\_HUM/  
 ein C receptor OS=Homo sapiens OX=9606 GN=PROCR PE=1 SV=1;tr|A0A0U1RQQ4|A0A0U1RQQ4\_I  
 krein-related peptidase 5 transcript variant 5 OS=Homo sapiens OX=9606 GN=KLK5 PE=2 SV=1;tr|A0  
 omolog OS=Homo sapiens OX=9606 GN=LOXL2 PE=2 SV=1;sp|Q9Y4K0|LOXL2\_HUMAN Lysyl oxidase  
 umorigenicity 14 protein homolog OS=Homo sapiens OX=9606 PE=2 SV=1;sp|Q9Y5Y6|ST14\_HUMAN  
 esion molecule 1 OS=Homo sapiens OX=9606 GN=F11R PE=3 SV=1;tr|Q6FIB4|Q6FIB4\_HUMAN Junc  
 onectin OS=Homo sapiens OX=9606 GN=FN1 PE=4 SV=1;tr|B7ZLE5|B7ZLE5\_HUMAN Fibronectin OS=  
 0 protein 9 (Fragment) OS=Homo sapiens OX=9606 GN=KLK10 PE=2 SV=1;tr|A0A024R4N7|A0A024R  
 ascin C (Hexabrachion), isoform CRA\_a OS=Homo sapiens OX=9606 GN=TNC PE=3 SV=1;tr|Q4LE33|Q  
 aran sulfate proteoglycan 2 (Perlecan), isoform CRA\_b OS=Homo sapiens OX=9606 GN=HSPG2 PE=4  
 olony-stimulating factor (Fragment) OS=Homo sapiens OX=9606 GN=CSF3 PE=2 SV=1;tr|A0A0B4U5E  
 class I antigen OS=Homo sapiens OX=9606 GN=HLA-C PE=3 SV=1;tr|A0A0S4T3H1|A0A0S4T3H1\_HUI  
 )|A0A0S4XRM0\_HUMAN;tr|A0A0U5PUM0|A0A0U5PUM0\_HUMAN;tr|A0A6B9VT42|A0A6B9VT42\_H

rionectin OS=Homo sapiens OX=9606 PE=2 SV=1;sp|P02751-10|FINC\_HUMAN Isoform 10 of Fibrone  
 ubcomponent C1r OS=Homo sapiens OX=9606 GN=C1R PE=1 SV=3;tr|Q53HU9|Q53HU9\_HUMAN Cc  
 l, highly similar to Homo sapiens desmocollin type 4 OS=Homo sapiens OX=9606 PE=2 SV=1  
 A E1 OS=Homo sapiens OX=9606 GN=RNASE7 PE=3 SV=1;tr|A8K9I2|A8K9I2\_HUMAN cDNA FLJ75277



, highly similar to Matrix metalloproteinase-9 (EC3.4.24.35) OS=Homo sapiens OX=9606 PE=2 SV=1;s

plasminogen activator OS=Homo sapiens OX=9606 GN=PLAU PE=1 SV=1;tr|Q5PY49|Q5PY49\_HUMA  
rtigen (Fragment) OS=Homo sapiens OX=9606 GN=HLA-C PE=3 SV=1;tr|F6IQL9|F6IQL9\_HUMAN MH  
elial growth factor A (Fragment) OS=Homo sapiens OX=9606 GN=VEGFA PE=1 SV=1;sp|P15692-2|VE  
issue growth factor OS=Homo sapiens OX=9606 GN=CTGF PE=2 SV=1;tr|B3KRV6|B3KRV6\_HUMAN cl

MAN Keratin 14 (Epidermolysis bullosa simplex, Dowling-Meara, Koebner), isoform CRA\_a OS=Homo  
|K2C6A HUMAN Keratin, type II cytoskeletal 6A OS=Homo sapiens OX=9606 GN=KRT6A PE=1 SV=3

I54081, highly similar to Keratin, type II cytoskeletal 5 OS=Homo sapiens OX=9606 PE=2 SV=1;tr|B4D

ratin, type I cytoskeletal 17 OS=Homo sapiens OX=9606 GN=KRT17 PE=1 SV=2;;tr|Q14666|Q14666\_I  
 MAN Uncharacterized protein DKFZp781M0386 OS=Homo sapiens OX=9606 GN=DKFZp781M0386 PE  
 AN Chloride intracellular channel protein OS=Homo sapiens OX=9606 GN=CLIC1 PE=2 SV=2;tr|Q53FB  
 hydryl oxidase OS=Homo sapiens OX=9606 GN=QSCN6 PE=2 SV=1;sp|O00391-2|QSOX1\_HUMAN Iso  
 idase OS=Homo sapiens OX=9606 PE=2 SV=1;tr|A8K6D3|A8K6D3\_HUMAN Beta-mannosidase OS=H  
 omo sapiens OX=9606 GN=AGRN;sp|O00468-3|AGRIN\_HUMAN Isoform 3 of Agrin OS=Homo sapiens

OS=Homo sapiens OX=9606 GN=CCN1 PE=1 SV=1;tr|B4DI61|B4DI61\_HUMAN cDNA FLJ58182, highly  
/1;tr|A0A024R5U5|A0A024R5U5\_HUMAN Disintegrin and metalloproteinase domain-containing pr  
\ HUMAN Myosin regulatory light chain 12A OS=Homo sapiens OX=9606 GN=MYL12A PE=1 SV=2;sp

initz-type protease inhibitor 1 (Fragment) OS=Homo sapiens OX=9606 GN=SPINT1 PE=1 SV=1;tr|B4D  
N4 HUMAN Alpha-actinin-4 OS=Homo sapiens OX=9606 GN=ACTN4 PE=1 SV=2;tr|Q96BG6|Q96BG6

stone H2B OS=Homo sapiens OX=9606 GN=HIST1H2BN PE=3 SV=1;tr|I6L9F7|I6L9F7\_HUMAN Histone H2B  
L;tr|A0A024R141|A0A024R141\_HUMAN Cathepsin L2, isoform CRA\_a OS=Homo sapiens OX=9606 GN=CTSL  
\_HUMAN Isoform 2 of WD repeat-containing protein 1 OS=Homo sapiens OX=9606 GN=WDR1;tr|B3H1  
Semaphorin-7A OS=Homo sapiens OX=9606 GN=SEMA7A;tr|F5GYX3|F5GYX3\_HUMAN Semaphorin-7A  
S=Homo sapiens OX=9606 GN=FLNB;sp|O75369|FLNB\_HUMAN Filamin-B OS=Homo sapiens OX=9606  
apiens OX=9606 GN=SERPINB7 PE=1 SV=1;tr|A8K3Q8|A8K3Q8\_HUMAN cDNA FLJ75069, highly similar  
form 3 of Attractin OS=Homo sapiens OX=9606 GN=ATRIN;sp|O75882-2|ATRIN\_HUMAN Isoform 2 of  
L;tr|Q6FHC9|Q6FHC9\_HUMAN STC2 protein (Fragment) OS=Homo sapiens OX=9606 GN=STC2 PE=2

V=1;sp|O95084|PRS23\_HUMAN Serine protease 23 OS=Homo sapiens OX=9606 GN=PRS23 PE=1 SV=1;tr|2RBR3\_HUMAN LY6/PLAUR domain containing 3 OS=Homo sapiens OX=9606 GN=LYPD3 PE=2 SV=1;tr|Q9H011\_HUMAN Follistatin-like 3 (Secreted glycoprotein), isoform CRA\_a OS=Homo sapiens OX=9606 GN=FSTL3 PE=3 SV=1;tr|P00338-3|LDHA\_HUMAN Lactate dehydrogenase A chain OS=Homo sapiens OX=9606 GN=LDHA PE=1 SV=2;sp|P00338-3|LDHA\_HUMAN Lactate dehydrogenase A chain OS=Homo sapiens OX=9606 GN=LDHA PE=1 SV=2;tr|A0A024R6W0|A0A024R6W0\_HUMAN Aspartate aminotransferase, mitochondrial OS=Homo sapiens OX=9606 GN=GOT2;tr|A0A024R6W0|A0A024R6W0\_HUMAN Aspartate aminotransferase, mitochondrial OS=Homo sapiens OX=9606 GN=GOT2;tr|P00558|PGK1\_HUMAN Phosphoglycerate kinase OS=Homo sapiens OX=9606 GN=HEL-S-68p PE=2 SV=1;sp|P00558|PGK1\_HUMAN Phosphoglycerate kinase OS=Homo sapiens OX=9606 GN=HEL-S-68p PE=2 SV=1;sp|P00558|PGK1\_HUMAN Phosphoglycerate kinase OS=Homo sapiens OX=9606 GN=HEL-S-68p PE=2 SV=1;tr|B4DNJ1|B4DNJ1\_HUMAN T-plasminogen activator OS=Homo sapiens OX=9606 GN=PLAT PE=1 SV=1;tr|B4DNJ1|B4DNJ1\_HUMAN T-plasminogen activator OS=Homo sapiens OX=9606 GN=PLAT PE=1 SV=1;tr|B4E216|B4E216\_HUMAN C3-beta-c OS=Homo sapiens OX=9606 GN=C3 PE=1 SV=2;tr|B4E216|B4E216\_HUMAN C3-beta-c OS=Homo sapiens OX=9606 GN=C3 PE=1 SV=2;tr|B4E216|B4E216\_HUMAN C3-beta-c OS=Homo sapiens OX=9606 GN=C3 PE=1 SV=2;tr|B3KQF4|B3KQF4\_HUMAN Metalloproteinase inhibitor 1 OS=Homo sapiens OX=9606 GN=TIMP1 PE=2 SV=1;tr|B3KQF4|B3KQF4\_HUMAN Metalloproteinase inhibitor 1 OS=Homo sapiens OX=9606 GN=TIMP1 PE=2 SV=1;tr|B3KQF4|B3KQF4\_HUMAN Metalloproteinase inhibitor 1 OS=Homo sapiens OX=9606 GN=TIMP1 PE=2 SV=1

I Low density lipoprotein receptor (Fragment) OS=Homo sapiens OX=9606 GN=LDLR PE=4 SV=1;tr|J3  
sapiens OX=9606 GN=INS PE=1 SV=1;tr|I3WAC9|I3WAC9\_HUMAN Insulin OS=Homo sapiens OX=960  
MAN Immunoglobulin kappa constant (Fragment) OS=Homo sapiens OX=9606 GN=IGKC PE=1 SV=1;tr|  
PE=2 SV=1;sp|P01876|IGHA1\_HUMAN Immunoglobulin heavy constant alpha 1 OS=Homo sapiens O  
collagen alpha-1(IV) chain (Fragment) OS=Homo sapiens OX=9606 GN=COL4A1 PE=1 SV=1;tr|A0A6G9  
is secretory sperm binding protein OS=Homo sapiens OX=9606 PE=2 SV=1;sp|P02545-6|LMNA\_HUN  
DE HUMAN Apolipoprotein E OS=Homo sapiens OX=9606 GN=APOE PE=1 SV=1;tr|A0A346DBY2|A0A

Homo sapiens OX=9606 GN=FN1;sp|P02751-11|FINC\_HUMAN Isoform 11 of Fibronectin OS=Homo sapiens  
binding protein OS=Homo sapiens OX=9606 GN=GC;tr|V9HWI6|V9HWI6\_HUMAN Gc-globulin OS=Homo sapiens

HUMAN Matrix metalloproteinase 1 preproprotein variant (Fragment) OS=Homo sapiens OX=9606 PE=1 SV=1;tr|J3KP  
HUMAN Fructose-bisphosphate aldolase OS=Homo sapiens OX=9606 GN=HEL-S-87p PE=2 SV=1;tr|J3KP  
iens OX=9606 GN=CSTB PE=1 SV=2;tr|A0A1W2PS52|A0A1W2PS52\_HUMAN Cystatin-B OS=Homo sapiens  
iens OX=9606 GN=ANXA1 PE=2 SV=1;tr|A0A4D5RAI5|A0A4D5RAI5\_HUMAN Annexin OS=Homo sapiens  
rotein (Fragment) OS=Homo sapiens OX=9606 GN=PRNP PE=3 SV=1;tr|Q6SES1|Q6SES1\_HUMAN Major  
omo sapiens OX=9606 GN=KRT1 PE=3 SV=1;tr|H6VRF9|H6VRF9\_HUMAN Cytokeratin-1 OS=Homo sapiens  
\_HUMAN Isoform 2 of Glyceraldehyde-3-phosphate dehydrogenase OS=Homo sapiens OX=9606 GN=H2AC12  
OS=Homo sapiens OX=9606 GN=H2AC12 PE=1 SV=3;sp|P04908|H2A1B\_HUMAN Histone H2A type 1  
oloid-beta precursor protein OS=Homo sapiens OX=9606 GN=APP PE=1 SV=3;sp|P05067-11|A4\_HUMAN

32), mRNA OS=Homo sapiens OX=9606 PE=2 SV=1;sp|P05120|PAI2\_HUMAN Plasminogen activator inhibitor 2  
A\_b OS=Homo sapiens OX=9606 GN=SERPINE1 PE=3 SV=1;sp|P05121|PAI1\_HUMAN Plasminogen activator inhibitor 1  
P05155-2|IC1\_HUMAN Isoform 2 of Plasma protease C1 inhibitor OS=Homo sapiens OX=9606 GN=SERPINE1  
37|RLA2\_HUMAN 60S acidic ribosomal protein P2 OS=Homo sapiens OX=9606 GN=RPLP2 PE=1 SV=1  
ta-1 OS=Homo sapiens OX=9606 GN=ITGB1;sp|P05556-5|ITB1\_HUMAN Isoform 5 of Integrin beta-1  
sapiens OX=9606 GN=GSN;tr|A0A384MEF1|A0A384MEF1\_HUMAN Actin-depolymerizing factor OS=Homo sapiens

100-A6 OS=Homo sapiens OX=9606 GN=S100A6 PE=1 SV=1;tr|B2R577|B2R577\_HUMAN Protein S100A6  
D-glycerate hydro-lyase OS=Homo sapiens OX=9606 GN=HEL-S-17 PE=2 SV=1;tr|A0A2R8Y6G6|A0A2R8Y6G6\_HUMAN  
MAN Isoform 2 of Glucose-6-phosphate isomerase OS=Homo sapiens OX=9606 GN=GPI;tr|A0A1W6A6|A0A1W6A6\_HUMAN  
AN Isoform 2 of Nucleophosmin OS=Homo sapiens OX=9606 GN=NPM1;tr|A0A0S2Z491|A0A0S2Z491\_HUMAN  
Tropomyosin alpha-3 chain OS=Homo sapiens OX=9606 GN=TPM3 PE=1 SV=1;sp|P06753-2|P06753-2\_HUMAN  
24R498\_HUMAN Serpin peptidase inhibitor, clade E (Nexin, plasminogen activator inhibitor type 1), member 1  
-lactate dehydrogenase B chain OS=Homo sapiens OX=9606 GN=LDHB PE=1 SV=2;tr|Q5U077|Q5U077\_HUMAN  
L Protein disulfide-isomerase OS=Homo sapiens OX=9606 GN=P4HB PE=2 SV=1;tr|H7BZ94|H7BZ94\_HUMAN  
apiens OX=9606 GN=HEL-S-130P PE=2 SV=1;tr|A0A1B0GWE8|A0A1B0GWE8\_HUMAN Cathepsin D OS=Homo sapiens  
Homo sapiens OX=9606 GN=ANXA2 PE=2 SV=1;tr|V9HW65|V9HW65\_HUMAN Annexin OS=Homo sapiens  
iens OX=9606 PE=2 SV=1;tr|A0A024QZQ2|A0A024QZQ2\_HUMAN Prosaposin (Variant Gaucher disease)  
ne PLACE1002374, highly similar to Cathepsin L OS=Homo sapiens OX=9606 PE=2 SV=1;tr|A5PLM9|A5PLM9\_HUMAN

=Homo sapiens OX=9606 GN=CTSB PE=2 SV=1;tr|B4DL49|B4DL49\_HUMAN Cathepsin B OS=Homo sapiens  
unit beta-1 OS=Homo sapiens OX=9606 GN=LAMB1 PE=1 SV=1;tr|Q8TAS6|Q8TAS6\_HUMAN LAMB1

6 GN=HSP90AB1 PE=3 SV=1;sp|P08238|HS90B\_HUMAN Heat shock protein HSP 90-beta OS=Homo sapiens  
a-A chain OS=Homo sapiens OX=9606 GN=INHBA PE=2 SV=1;sp|P08476|INHBA\_HUMAN Inhibin beta A chain  
72|CO4A2\_HUMAN Collagen alpha-2(IV) chain OS=Homo sapiens OX=9606 GN=COL4A2 PE=1 SV=4;tr|A0A024R728|A0A024R728\_HUMAN  
patocyte growth factor receptor OS=Homo sapiens OX=9606 GN=MET PE=1 SV=4;tr|A0A024R728|A0A024R728\_HUMAN  
ns OX=9606 GN=VIM PE=1 SV=4;tr|B0YJC4|B0YJC4\_HUMAN Vimentin OS=Homo sapiens OX=9606 GN=VIM  
sapiens OX=9606 GN=ANXA5 PE=1 SV=2;tr|E9PHT9|E9PHT9\_HUMAN Annexin OS=Homo sapiens OX=9606  
omo sapiens OX=9606 GN=HEL-S-22 PE=2 SV=1;sp|P09211|GSTP1\_HUMAN Glutathione S-transferase P1

ns OX=9606 GN=SPARC PE=3 SV=1;tr|B2RDL6|B2RDL6\_HUMAN Osteonectin OS=Homo sapiens OX=9606  
UMAN Complement C1s subcomponent OS=Homo sapiens OX=9606 GN=C1S PE=1 SV=1;tr|B3KNX0|B3KNX0\_HUMAN  
ribosomal protein S27a OS=Homo sapiens OX=9606 GN=RPS27A PE=1 SV=2;tr|F5GXX7|F5GXX7\_HUMAN  
i=Homo sapiens OX=9606 GN=SET PE=1 SV=1;sp|Q01105-4|SET\_HUMAN Isoform 4 of Protein SET OS=Homo sapiens

HUMAN Heat shock 70 kDa protein 1A OS=Homo sapiens OX=9606 GN=HSPA1A PE=1 SV=1;sp|P0DM1  
Homo sapiens OX=9606 GN=CALM1 PE=1 SV=1;sp|P0DP24|CALM2\_HUMAN Calmodulin-2 OS=Homo sa  
P2RF\_HUMAN Receptor-type tyrosine-protein phosphatase F OS=Homo sapiens OX=9606 GN=PTPRF F  
ns OX=9606 GN=TXN PE=2 SV=1;sp|P10599-2|THIO\_HUMAN Isoform 2 of Thioredoxin OS=Homo sa  
N 78 kDa glucose-regulated protein OS=Homo sapiens OX=9606 GN=HEL-S-89n PE=2 SV=1  
;sp|P11047|LAMC1\_HUMAN Laminin subunit gamma-1 OS=Homo sapiens OX=9606 GN=LAMC1 PE=  
.N Epididymis luminal protein 33 OS=Homo sapiens OX=9606 GN=HEL-S-72p PE=2 SV=1;tr|E9PKE3|E  
5H7\_HUMAN Collagen, type VI, alpha 1, isoform CRA\_b OS=Homo sapiens OX=9606 GN=COL6A1 PE=  
\_HUMAN Alpha-actinin-1 OS=Homo sapiens OX=9606 GN=ACTN1 PE=1 SV=2;sp|P12814-3|ACTN1\_H  
1 OS=Homo sapiens OX=9606 GN=CDH1 PE=4 SV=1;tr|A0A0U2ZQU7|A0A0U2ZQU7\_HUMAN E-cadh  
HUMAN cDNA FLJ77316, highly similar to Homo sapiens interferon, gamma-inducible protein 30 (IFI3  
;\_HUMAN cDNA FLJ56548, highly similar to Elongation factor 2 OS=Homo sapiens OX=9606 PE=2 SV=  
MAN Protein disulfide-isomerase A4 OS=Homo sapiens OX=9606 GN=PDIA4 PE=1 SV=2;tr|A0A499FI  
.N Translationally-controlled tumor protein (Fragment) OS=Homo sapiens OX=9606 GN=TPT1 PE=1 SV  
.N L-plastin variant (Fragment) OS=Homo sapiens OX=9606 PE=2 SV=1;tr|A0A024RDT4|A0A024RDT4  
rotein OS=Homo sapiens OX=9606 PE=1 SV=1;tr|A0A2U3TZL5|A0A2U3TZL5\_HUMAN CD59 glycoprot  
:1;tr|A2VCQ4|A2VCQ4\_HUMAN PRKCSH protein (Fragment) OS=Homo sapiens OX=9606 GN=PRKCS  
ns OX=9606 GN=NID1 PE=1 SV=3;tr|A0A384MR25|A0A384MR25\_HUMAN Epididymis secretory spe  
se OS=Homo sapiens OX=9606 GN=HEL-S-30 PE=2 SV=1;sp|P14618-2|KPYM\_HUMAN Isoform M1 of  
P2\_HUMAN Epididymis luminal protein 35 OS=Homo sapiens OX=9606 GN=HEL-S-125m PE=2 SV=1;sp  
SV=1;sp|P15151-3|PVR\_HUMAN Isoform Gamma of Poliovirus receptor OS=Homo sapiens OX=9606  
'AH9|B7ZAH9\_HUMAN cDNA, FLJ79193, highly similar to Beta-1,4-galactosyltransferase 1 OS=Homo  
lymis secretory protein Li 105 OS=Homo sapiens OX=9606 GN=HEL-S-105 PE=2 SV=1;tr|Q6NUR7|Q6

OVK57\_HUMAN Metalloproteinase inhibitor 2 OS=Homo sapiens OX=9606 PE=2 SV=1;sp|P16035|TII  
en OS=Homo sapiens OX=9606 GN=CD44;sp|P16070-5|CD44\_HUMAN Isoform 5 of CD44 antigen OS  
a (Fragment) OS=Homo sapiens OX=9606 PE=2 SV=1;sp|P16144-4|ITB4\_HUMAN Isoform Beta-4D of

ulin OS=Homo sapiens OX=9606 GN=VCL PE=3 SV=1;sp|P18206-2|VINC\_HUMAN Isoform 1 of Vincul  
JMAN Phosphoglycerate mutase OS=Homo sapiens OX=9606 GN=PGAM1 PE=2 SV=1;tr|Q53G35|Q5  
rm CRA\_c OS=Homo sapiens OX=9606 GN=FST PE=4 SV=1;sp|P19883|FST\_HUMAN Follistatin OS=Ho

aining protein OS=Homo sapiens OX=9606 PE=2 SV=1;tr|A0A384ME06|A0A384ME06\_HUMAN Epidi  
OX=9606 GN=FLNA PE=1 SV=4;sp|P21333-2|FLNA\_HUMAN Isoform 2 of Filamin-A OS=Homo sapien  
piens OX=9606 GN=MDK PE=1 SV=1;tr|E9PLM6|E9PLM6\_HUMAN Midkine OS=Homo sapiens OX=96  
OX=9606 PE=2 SV=1;tr|A8K7E0|A8K7E0\_HUMAN Biglycan OS=Homo sapiens OX=9606 PE=2 SV=1;tr|C  
Tetraspanin OS=Homo sapiens OX=9606 GN=CD9 PE=1 SV=1;tr|A0A2R8Y478|A0A2R8Y478\_HUMAN  
sapiens OX=9606 GN=CDH3 PE=1 SV=2;tr|B4DLF0|B4DLF0\_HUMAN cDNA FLJ50795, highly similar t  
N Nucleoside diphosphate kinase OS=Homo sapiens OX=9606 GN=NME1-NME2 PE=1 SV=1;tr|Q6FHN  
OS=Homo sapiens OX=9606 PE=2 SV=1;sp|P35321|SPR1A\_HUMAN Cornifin-A OS=Homo sapiens O  
24R1U8\_HUMAN Insulin-like growth factor-binding protein 4 OS=Homo sapiens OX=9606 GN=IGFBP4  
piens OX=9606 GN=FBLN1;tr|B1AHL2|B1AHL2\_HUMAN Fibulin-1 OS=Homo sapiens OX=9606 GN=FI  
Alpha-6X1A of Integrin alpha-6 OS=Homo sapiens OX=9606 GN=ITGA6;sp|P23229-5|ITA6\_HUMAN Is

on-muscle isoform (Fragment) OS=Homo sapiens OX=9606 GN=CFL1 PE=1 SV=8;sp|P23528|COF1\_HI  
no sapiens OX=9606 GN=TNC;tr|F5H7V9|F5H7V9\_HUMAN Tenascin OS=Homo sapiens OX=9606 GN

Proteasome subunit alpha type OS=Homo sapiens OX=9606 GN=PSMA3 PE=2 SV=1;tr|A0A140VK43|  
N Proteasome endopeptidase complex OS=Homo sapiens OX=9606 GN=PSMA4 PE=1 SV=1;tr|B2RDG  
cDNA FLJ60385, highly similar to Integrin alpha-3 OS=Homo sapiens OX=9606 PE=2 SV=1;tr|A0A140'

omo sapiens OX=9606 GN=CDH13 PE=1 SV=1;tr|B7Z9B1|B7Z9B1\_HUMAN Cadherin-13 OS=Homo sa  
 5=Homo sapiens OX=9606 GN=CD81 PE=1 SV=1;tr|H0YDL9|H0YDL9\_HUMAN Tetraspanin (Fragment  
 3 isomerase OS=Homo sapiens OX=9606 GN=HEL-S-49 PE=2 SV=1;tr|Q53HE2|Q53HE2\_HUMAN Trios  
 7teasome subunit alpha type OS=Homo sapiens OX=9606 GN=PSMA6 PE=1 SV=1;tr|A0A140VK44|A0  
 bulin OS=Homo sapiens OX=9606 PE=2 SV=1;tr|A6XMH4|A6XMH4\_HUMAN Beta-2-microglobulin OS  
 \_HUMAN Epididymal secretory protein E1 OS=Homo sapiens OX=9606 GN=NPC2 PE=2 SV=1;sp|P619  
 4168 fis, clone NT2RP2001440, highly similar to 14-3-3 protein gamma OS=Homo sapiens OX=9606 P  
 s luminal protein 2 OS=Homo sapiens OX=9606 GN=HEL2 PE=2 SV=1;tr|G9K389|G9K389\_HUMAN YL  
 5=Homo sapiens OX=9606 GN=TMSB4X PE=1 SV=2;tr|Q0P5T0|Q0P5T0\_HUMAN TMSB4X protein (Fra

no sapiens OX=9606 GN=HIST1H4J PE=2 SV=1;sp|P62805|H4\_HUMAN Histone H4 OS=Homo sapien:  
ptidyl-prolyl cis-trans isomerase OS=Homo sapiens OX=9606 PE=2 SV=1;tr|V9HWF5|V9HWF5\_HUM/  
3\_HUMAN Peptidylprolyl isomerase OS=Homo sapiens OX=9606 GN=FKBP1A PE=1 SV=1;tr|A0A087V  
protein zeta/delta OS=Homo sapiens OX=9606 GN=YWHAZ PE=1 SV=1;tr|E7EX29|E7EX29\_HUMAN  
HUMAN cDNA FLJ57283, highly similar to Actin, cytoplasmic 2 OS=Homo sapiens OX=9606 PE=2 SV=1

OS=Homo sapiens OX=9606 GN=CD109 PE=1 SV=2;sp|Q6YHK3-2|CD109\_HUMAN Isoform 2 of CD109  
06 PE=2 SV=1;tr|A0A024R127|A0A024R127\_HUMAN Adhesion molecule with Ig-like domain 2, isofo  
N Isoform 5 of Lipolysis-stimulated lipoprotein receptor OS=Homo sapiens OX=9606 GN=LSR;tr|S4R5  
N cDNA FLJ55979, highly similar to Homo sapiens AE binding protein 1 (AEBP1), mRNA OS=Homo sa

JA669KBG0\_HUMAN Proprotein convertase 9 OS=Homo sapiens OX=9606 GN=PCSK9 PE=1 SV=1  
:1;tr|B4DHD2|B4DHD2\_HUMAN cDNA FLJ55458, highly similar to Programmed cell death 6-interacti  
gment) OS=Homo sapiens OX=9606 GN=FAM3C PE=1 SV=1;tr|C9JMN4|C9JMN4\_HUMAN Protein FA  
omolog (Fragment) OS=Homo sapiens OX=9606 GN=PXD1 PE=1 SV=1;sp|Q92626-2|PXD1\_HUMAN  
tein (Fragment) OS=Homo sapiens OX=9606 GN=HTRA1 PE=2 SV=1;tr|B3KRN4|B3KRN4\_HUMAN cDN  
UMAN Isoform 3 of Neuronal cell adhesion molecule OS=Homo sapiens OX=9606 GN=NRCAM;sp|Q9  
3 of Golgi apparatus protein 1 OS=Homo sapiens OX=9606 GN=GLG1;sp|Q92896-2|GSLG1\_HUMAN I  
|Q96FE7-4|P3IP1\_HUMAN Isoform 4 of Phosphoinositide-3-kinase-interacting protein 1 OS=Homo sa  
disease protein 7 OS=Homo sapiens OX=9606 GN=PARK7 PE=1 SV=2;tr|K7ELW0|K7ELW0\_HUMAN F  
ptidase OS=Homo sapiens OX=9606 GN=LGMN PE=2 SV=1;tr|Q53XC6|Q53XC6\_HUMAN Asparaginyl  
Collagen alpha-1(XII) chain OS=Homo sapiens OX=9606 GN=COL12A1 PE=1 SV=1;sp|Q99715|COCA1

IMAN Thioredoxin domain-containing protein 17 OS=Homo sapiens OX=9606 GN=TXNDC17 PE=1 SV=  
15 kDa calcium-binding protein OS=Homo sapiens OX=9606 GN=SDF4 PE=1 SV=1;sp|Q9BRK5-3|CAB4  
\_HUMAN Tubulointerstitial nephritis antigen-like OS=Homo sapiens OX=9606 GN=TINAGL1 PE=1 SV=  
22|Q86Z22\_HUMAN Epididymis secretory protein Li 297 OS=Homo sapiens OX=9606 GN=HEL-S-297  
-4B OS=Homo sapiens OX=9606 GN=SEMA4B PE=1 SV=4;tr|H0YIMZ3|H0YIMZ3\_HUMAN Semaphorin-  
n-2 OS=Homo sapiens OX=9606 GN=TENM2;tr|G3V106|G3V106\_HUMAN HCG38403, isoform CRA\_k  
\_HUMAN Cysteine-rich motor neuron 1 protein OS=Homo sapiens OX=9606 GN=CRIM1 PE=1 SV=1  
WL2\_HUMAN PTGFRN protein (Fragment) OS=Homo sapiens OX=9606 GN=PTGFRN PE=2 SV=1;tr|Q4  
lated protein 3 OS=Homo sapiens OX=9606 GN=DKK3 PE=1 SV=1;tr|O43532|O43532\_HUMAN RIG-li

arboxypeptidase A4 OS=Homo sapiens OX=9606 GN=CPA4;tr|A4D1M3|A4D1M3\_HUMAN Carboxype  
AN Collagen, type XVII, alpha 1, isoform CRA\_b OS=Homo sapiens OX=9606 GN=COL17A1 PE=2 SV=1;  
-HUMAN Endothelial protein C receptor (Fragment) OS=Homo sapiens OX=9606 GN=PROCR PE=1 SV=  
A2I2MP49|A0A2I2MP49\_HUMAN Kallikrein-related peptidase 5 transcript variant 6 OS=Homo sapie  
: homolog 2 OS=Homo sapiens OX=9606 GN=LOXL2 PE=1 SV=1;tr|W8QRJ0|W8QRJ0\_HUMAN Lysyl o  
V Suppressor of tumorigenicity 14 protein OS=Homo sapiens OX=9606 GN=ST14 PE=1 SV=2;tr|Q8WV  
tional adhesion molecule 1 OS=Homo sapiens OX=9606 GN=F11R PE=2 SV=1;sp|Q9Y624|JAM1\_HUM

4N7\_HUMAN Kallikrein 10, isoform CRA\_a OS=Homo sapiens OX=9606 GN=KLK10 PE=4 SV=1;tr|W8C  
4LE33\_HUMAN TNC variant protein (Fragment) OS=Homo sapiens OX=9606 GN=TNC variant protein  
SV=1;sp|P98160|PGBM\_HUMAN Basement membrane-specific heparan sulfate proteoglycan core p  
3|A0A0B4U5E3\_HUMAN Granulocyte colony-stimulating factor (Fragment) OS=Homo sapiens OX=96  
MAN MHC class I antigen OS=Homo sapiens OX=9606 GN=HLA-C PE=3 SV=1;tr|A0A5H2UZM2|A0A5H  
-HUMAN;tr|E5FQ47|E5FQ47\_HUMAN;tr|A0A0F7RPE2|A0A0F7RPE2\_HUMAN;tr|D1MYY9|D1MYY9\_H

plement subcomponent C1r (Fragment) OS=Homo sapiens OX=9606 PE=2 SV=1;tr|Q53HT9|Q53H

, highly similar to Homo sapiens ribonuclease, RNase A family, 7 (RNASE7), mRNA OS=Homo sapiens

p|P14780|MMP9\_HUMAN Matrix metalloproteinase-9 OS=Homo sapiens OX=9606 GN=MMP9 PE=1

.N Urokinase-type plasminogen activator (Fragment) OS=Homo sapiens OX=9606 PE=2 SV=1;sp|P007  
C class I antigen (Fragment) OS=Homo sapiens OX=9606 GN=HLA-C PE=3 SV=1;tr|B4DYY0|B4DYY0\_1  
:GFA\_HUMAN Isoform VEGF189 of Vascular endothelial growth factor A OS=Homo sapiens OX=9606  
DNA FLJ34961 fis, clone NTONG2003839, highly similar to CONNECTIVE TISSUE GROWTH FACTOR OS:













-HUMAN;tr|A0A5H2UFF7|A0A5H2UFF7\_HUMAN;tr|A0A3S6RFC0|A0A3S6RFC0\_HUMAN;tr|A0A6B7H















GP6|A0A6B7HGP6\_HUMAN;tr|A0A6B9VTX5|A0A6B9VTX5\_HUMAN;tr|A0A5H2UF70|A0A5H2UF70\_















\_HUMAN;tr|A0A4Y5P8Y7|A0A4Y5P8Y7\_HUMAN;tr|A0A4P2SQZ3|A0A4P2SQZ3\_HUMAN;tr|A0A4P2















SQQ2|A0A4P2SQQ2\_HUMAN;tr|A0A3S6RIB1|A0A3S6RIB1\_HUMAN;tr|A0A6B7HGP2|A0A6B7HGP2\_















\_HUMAN;tr|A0A583ZAW1|A0A583ZAW1\_HUMAN;tr|A0A3G2Y4K4|A0A3G2Y4K4\_HUMAN;tr|A0A6I















B9VR96|A0A6B9VR96\_HUMAN;tr|A0A6B7FTB7|A0A6B7FTB7\_HUMAN;tr|A0A223FL72|A0A223FL72













!\_HUMAN;tr|A0A6C0SE86|A0A6C0SE86\_HUMAN;tr|A0A6C0SEA1|A0A6C0SEA1\_HUMAN;tr|B1PKY3















|B1PKY3\_HUMAN;tr|A0A4Y5ULL4|A0A4Y5ULL4\_HUMAN;tr|A0A4P2STA1|A0A4P2STA1\_HUMAN;tr















|A0A4P2ST16|A0A4P2ST16\_HUMAN;tr|A0A6B7HHR8|A0A6B7HHR8\_HUMAN;tr|A0A3S6REZ3|A0A3















S6REZ3\_HUMAN;tr|A0A2P9FIT1|A0A2P9FIT1\_HUMAN;tr|A0A2U3QLE8|A0A2U3QLE8\_HUMAN;tr|A















\0A2U3QLG4|A0A2U3QLG4\_HUMAN;tr|A0A2U3QLL1|A0A2U3QLL

| LFQ intens |
|------------|------------|------------|------------|------------|------------|------------|------------|------------|
| 30,68529   | 30,28703   | 30,85964   | 30,81879   | 30,90928   | 30,77941   | 30,85823   | 30,37399   | 30,38577   |
| 26,97235   | 27,53875   | 23,70641   | 22,08734   | 23,46811   | 22,2817    | 22,63029   | 27,70695   | 27,51427   |
| 22,93884   | 22,8041    | 29,19943   | 28,65775   | 22,67563   | 28,79383   | 29,29743   | 22,48849   | 23,56157   |
| 28,38961   | 29,04604   | 27,39198   | 27,05734   | 28,2615    | 27,86071   | 27,11128   | 28,68201   | 29,20016   |
| 31,3198    | 32,1689    | 30,87943   | 30,74903   | 30,78659   | 30,80301   | 30,76256   | 31,63901   | 31,60342   |
| 34,12325   | 32,30138   | 33,52869   | 33,55225   | 33,47255   | 32,45425   | 32,37485   | 31,58352   | 31,52687   |
| 31,38469   | 31,11873   | 31,19578   | 31,53723   | 31,60116   | 31,29576   | 31,11471   | 32,09704   | 32,07728   |
| 29,73119   | 27,79749   | 28,15938   | 27,87701   | 28,09628   | 28,40255   | 28,18778   | 28,98829   | 29,14239   |
| 24,22059   | 25,35528   | 25,29018   | 24,60156   | 24,26556   | 24,5428    | 24,76157   | 24,10556   | 22,01563   |
| 25,24107   | 23,69519   | 23,87995   | 25,01504   | 24,50355   | 23,90812   | 24,18526   | 26,31443   | 26,06079   |
| 23,67721   | 22,78137   | 23,41876   | 26,10536   | 26,18569   | 25,36903   | 25,84886   | 23,16877   | 21,86169   |
| 29,76917   | 28,95427   | 28,57236   | 29,82902   | 30,14722   | 29,61994   | 30,10762   | 31,08759   | 31,39622   |
| 29,96939   | 29,87926   | 28,24984   | 28,92269   | 29,53094   | 29,31214   | 29,26177   | 30,53853   | 30,19531   |
| 23,84414   | 24,56426   | 24,14361   | 26,90047   | 27,01797   | 23,04612   | 26,99194   | 23,29207   | 21,7728    |
| 23,23996   | 24,51734   | 23,0489    | 24,38555   | 22,96906   | 23,09225   | 23,3615    | 21,63014   | 21,64979   |
| 28,62048   | 28,59463   | 28,16322   | 28,52099   | 28,36035   | 28,34617   | 28,57015   | 27,47212   | 27,3232    |
| 29,03701   | 27,4182    | 27,61744   | 30,29428   | 30,01478   | 29,87616   | 30,71498   | 26,92717   | 27,37103   |
| 26,29667   | 25,03846   | 24,52492   | 25,97248   | 25,33504   | 25,60096   | 26,30412   | 24,09491   | 24,71654   |
| 29,24704   | 28,01919   | 28,46486   | 27,12475   | 27,50127   | 27,40162   | 27,56761   | 28,76853   | 29,01962   |
| 26,1668    | 27,14763   | 26,99043   | 26,60442   | 26,65335   | 27,12839   | 27,13193   | 25,5854    | 25,88229   |
| 23,27266   | 23,05515   | 24,49419   | 28,20527   | 23,44089   | 22,41971   | 23,52586   | 28,58692   | 28,11098   |
| 26,7406    | 27,39648   | 27,47885   | 26,64636   | 26,88367   | 27,06569   | 27,16873   | 27,61147   | 27,93061   |
| 28,80999   | 28,71509   | 28,60918   | 28,03239   | 28,31825   | 28,30138   | 28,43583   | 29,45138   | 29,59557   |
| 21,37512   | 22,7043    | 21,79578   | 23,34055   | 23,29488   | 23,16682   | 23,1216    | 21,44602   | 21,38864   |
| 21,08503   | 22,76161   | 23,87801   | 23,80747   | 22,82011   | 21,57761   | 22,86011   | 27,84356   | 27,88681   |
| 28,76202   | 29,10482   | 27,51923   | 29,5136    | 29,89116   | 30,42722   | 29,85855   | 29,03499   | 29,16816   |
| 35,727     | 35,08001   | 34,21993   | 35,31125   | 35,36708   | 34,7692    | 34,89767   | 35,99507   | 36,21522   |
| 28,86847   | 25,22255   | 23,93872   | 28,67949   | 28,82271   | 28,34875   | 28,94827   | 29,42582   | 30,35174   |
| 29,18348   | 29,40099   | 28,37952   | 29,30898   | 29,31954   | 29,29999   | 29,52232   | 30,40304   | 30,03486   |
| 22,35912   | 23,95871   | 21,64258   | 23,57819   | 22,99253   | 21,29182   | 21,36832   | 24,78731   | 24,35057   |
| 25,23356   | 26,33668   | 24,68886   | 24,4084    | 24,56209   | 26,16092   | 25,99401   | 23,71963   | 24,19764   |
| 30,33947   | 28,09894   | 28,59385   | 30,34794   | 29,98726   | 29,70336   | 30,16591   | 29,10734   | 29,01404   |
| 27,87079   | 28,04323   | 27,51668   | 27,61996   | 27,93326   | 27,3379    | 27,7082    | 29,23938   | 29,22041   |

| LFQ intens | LFQ intens | Potential c | Student's T | Student's T | Peptides | Razor + un | Unique pe | Sequence c |
|------------|------------|-------------|-------------|-------------|----------|------------|-----------|------------|
| 30,30171   | 30,06201   | +           | 2_3         | 18          | 18       | 3          | 26,5      |            |
| 27,15528   | 27,30669   | +           | 2_3         | 8           | 8        | 6          | 30,8      |            |
| 21,97597   | 22,60404   | +           | 2_3         | 3           | 3        | 3          | 11,3      |            |
| 28,69604   | 29,52217   | +           | 2_3         | 5           | 5        | 5          | 31,7      |            |
| 31,44618   | 31,4631    | +           | 2_3         | 8           | 8        | 8          | 83,2      |            |
| 31,4446    | 31,74186   | +           | 2_3         | 16          | 16       | 16         | 42        |            |
| 32,10793   | 32,37233   | +           | 2_3         | 22          | 22       | 22         | 54,9      |            |
| 29,07694   | 28,57261   | +           | 2_3         | 12          | 12       | 12         | 10        |            |
| 22,38684   | 22,3639    | +           | 2_3         | 4           | 4        | 3          | 10,7      |            |
| 25,89375   | 25,32711   | +           | 2_3         | 6           | 6        | 6          | 35,2      |            |
| 24,02359   | 22,4964    | +           | 2_3         | 2           | 2        | 2          | 21,4      |            |
| 30,8017    | 30,96237   | +           | 2_3         | 8           | 8        | 8          | 53,4      |            |
| 30,52318   | 30,37389   | +           | 2_3         | 13          | 13       | 4          | 30,9      |            |
| 23,14555   | 22,7834    | +           | 2_3         | 2           | 2        | 2          | 2,7       |            |
| 21,57464   | 22,0971    | +           | 2_3         | 2           | 2        | 2          | 12        |            |
| 27,91239   | 27,94665   | +           | 2_3         | 12          | 12       | 12         | 25,8      |            |
| 27,52447   | 26,34316   | +           | 2_3         | 21          | 18       | 18         | 24,7      |            |
| 24,94864   | 24,56889   | +           | 2_3         | 3           | 3        | 1          | 9,6       |            |
| 28,78176   | 29,24681   | +           | 2_3         | 7           | 7        | 7          | 6,7       |            |
| 25,67694   | 26,49496   | +           | 2_3         | 5           | 5        | 5          | 20,7      |            |
| 28,78924   | 27,59662   | +           | 2_3         | 3           | 3        | 3          | 25,7      |            |
| 27,73596   | 27,54768   | +           | 2_3         | 5           | 5        | 5          | 21        |            |
| 29,28701   | 29,04679   | +           | 2_3         | 7           | 7        | 7          | 17,1      |            |
| 21,26774   | 22,32003   | +           | 2_3         | 4           | 4        | 4          | 31,3      |            |
| 27,65055   | 23,1283    | +           | 2_3         | 7           | 5        | 5          | 18,3      |            |
| 28,96058   | 28,41216   | +           | 2_3         | 11          | 11       | 11         | 35,6      |            |
| 36,06305   | 35,62631   | +           | 2_3         | 61          | 61       | 61         | 61,7      |            |
| 30,30726   | 29,43418   | +           | 2_3         | 28          | 28       | 28         | 17,4      |            |
| 29,72728   | 30,19507   | +           | 2_3         | 9           | 9        | 9          | 29,4      |            |
| 24,67632   | 24,27049   | +           | 2_3         | 7           | 7        | 7          | 7,9       |            |
| 23,18006   | 22,52028   | +           | 2_3         | 4           | 4        | 4          | 17,4      |            |
| 29,35323   | 29,58923   | +           | 2_3         | 5           | 5        | 1          | 4,8       |            |
| 29,24386   | 28,63159   | +           | 2_3         | 12          | 12       | 12         | 41        |            |

| Unique + r | Unique sec | Mol. weight | Q-value | Score  | Intensity | MS/MS | col      | iBAQ 1-1 | iBAQ 1-3 |
|------------|------------|-------------|---------|--------|-----------|-------|----------|----------|----------|
| 26,5       | 4,4        | 82,577      | 0       | 195,5  | 1,26E+10  | 179   | 54165000 | 12210000 |          |
| 30,8       | 28,4       | 37,371      | 0       | 10,842 | 9,27E+08  | 27    | 8190000  | 9313400  |          |
| 11,3       | 11,3       | 47,984      | 0       | 2,6777 | 2,77E+09  | 7     | 23685000 | 17189000 |          |
| 31,7       | 31,7       | 32,212      | 0       | 108,45 | 2,79E+09  | 30    | 31201000 | 18398000 |          |
| 83,2       | 83,2       | 16,057      | 0       | 60,299 | 2,01E+10  | 126   | 3,41E+08 | 2,58E+08 |          |
| 42         | 42         | 53,981      | 0       | 323,31 | 6,47E+10  | 186   | 1,07E+09 | 1,67E+08 |          |
| 54,9       | 54,9       | 47,472      | 0       | 221,05 | 2,57E+10  | 201   | 56633000 | 29258000 |          |
| 10         | 10         | 167,55      | 0       | 175,05 | 3,33E+09  | 86    | 10641000 | 1712800  |          |
| 10,7       | 8,6        | 70,289      | 0       | 49,458 | 1,44E+08  | 16    | 321640   | 435020   |          |
| 35,2       | 35,2       | 20,195      | 0       | 36,023 | 2,77E+08  | 23    | 1245600  | 1639600  |          |
| 21,4       | 21,4       | 12,269      | 0       | 4,7231 | 1,89E+08  | 9     | 0        | 0        |          |
| 53,4       | 53,4       | 14,374      | 0       | 29,647 | 1E+10     | 38    | 95637000 | 32647000 |          |
| 30,9       | 8,7        | 70,154      | 0       | 67,45  | 7,24E+09  | 83    | 33291000 | 12880000 |          |
| 2,7        | 2,7        | 81,996      | 0       | 4,2977 | 5,09E+08  | 7     | 1133600  | 804460   |          |
| 12         | 12         | 26,425      | 0       | 6,001  | 47823000  | 6     | 1015500  | 284770   |          |
| 25,8       | 25,8       | 67,877      | 0       | 41,025 | 2,24E+09  | 49    | 10391000 | 13131000 |          |
| 21,6       | 21,6       | 129,99      | 0       | 141,34 | 4,38E+09  | 75    | 12295000 | 1243100  |          |
| 9,6        | 4,5        | 42,1        | 0       | 23,912 | 3,13E+08  | 26    | 2549200  | 869580   |          |
| 6,7        | 6,7        | 135,51      | 0       | 79,196 | 2,89E+09  | 58    | 9983300  | 823220   |          |
| 20,7       | 20,7       | 36,426      | 0       | 23,244 | 7,43E+08  | 26    | 11018000 | 8268400  |          |
| 25,7       | 25,7       | 19,365      | 0       | 17,92  | 1,25E+09  | 12    | 0        | 0        |          |
| 21         | 21         | 36,923      | 0       | 31,222 | 1,28E+09  | 33    | 9219400  | 3546100  |          |
| 17,1       | 17,1       | 55,394      | 0       | 28,686 | 3,58E+09  | 38    | 14707000 | 10814000 |          |
| 31,3       | 31,3       | 22,588      | 0       | 13,402 | 44157000  | 17    | 369740   | 405650   |          |
| 16         | 16         | 40,368      | 0       | 40,17  | 7,29E+08  | 18    | 1903000  | 277100   |          |
| 35,6       | 35,6       | 46,231      | 0       | 107,1  | 4,97E+09  | 88    | 27149000 | 12938000 |          |
| 61,7       | 61,7       | 130,97      | 0       | 323,31 | 3,73E+11  | 747   | 9,16E+08 | 3,04E+08 |          |
| 17,4       | 17,4       | 250,53      | 0       | 117,47 | 4,52E+09  | 135   | 9374900  | 102170   |          |
| 29,4       | 29,4       | 51,286      | 0       | 275,36 | 6,29E+09  | 60    | 36163000 | 13834000 |          |
| 7,9        | 7,9        | 144,37      | 0       | 15,203 | 91054000  | 25    | 40472    | 2135,8   |          |
| 17,4       | 17,4       | 35,634      | 0       | 13,115 | 2,33E+08  | 21    | 4258900  | 6014000  |          |
| 4,8        | 1,2        | 99,978      | 0       | 22,836 | 6,46E+09  | 38    | 29561000 | 133310   |          |
| 41         | 41         | 38,069      | 0       | 64,295 | 2,72E+09  | 54    | 13368000 | 2663600  |          |

| iBAQ 1-5 | iBAQ 2-1 | iBAQ 2-2 | iBAQ 2-3 | iBAQ 2-4 | iBAQ 3-1 | iBAQ 3-2 | iBAQ 3-3 | iBAQ 3-4 |
|----------|----------|----------|----------|----------|----------|----------|----------|----------|
| 29242000 | 39609000 | 32490000 | 17230000 | 26972000 | 24950000 | 20929000 | 14283000 | 8368400  |
| 2033800  | 3624300  | 2735800  | 2599600  | 2297300  | 400020   | 8990700  | 4583100  | 6714600  |
| 39423000 | 14621000 | 14565000 | 7251600  | 14615000 | 0        | 9435800  | 0        | 12914000 |
| 10513000 | 204400   | 19545000 | 13218000 | 7775800  | 34127000 | 30843000 | 47751000 | 39640000 |
| 1,55E+08 | 1,92E+08 | 2,04E+08 | 99544000 | 77229000 | 4,11E+08 | 2,89E+08 | 2,88E+08 | 2,03E+08 |
| 1,59E+08 | 3,83E+08 | 5,26E+08 | 1,52E+08 | 1,34E+08 | 1,12E+08 | 1,32E+08 | 40595000 | 65369000 |
| 30019000 | 65485000 | 89792000 | 52195000 | 55961000 | 1,92E+08 | 1,2E+08  | 1,97E+08 | 1E+08    |
| 2335900  | 1838500  | 1734200  | 4253600  | 4157300  | 3882100  | 3745000  | 2287600  | 2609700  |
| 509920   | 1673100  | 350350   | 253220   | 301970   | 27477    | 10296    | 0        | 0        |
| 232680   | 886330   | 483090   | 178550   | 1638200  | 11482000 | 1409300  | 9706600  | 1869100  |
| 1063800  | 9016000  | 7426100  | 3955500  | 7096900  | 2074800  | 517490   | 0        | 362010   |
| 29674000 | 80375000 | 1,16E+08 | 42079000 | 81811000 | 1,9E+08  | 2,94E+08 | 3,28E+08 | 1,43E+08 |
| 4528100  | 11167000 | 17090000 | 19611000 | 10555000 | 45536000 | 30795000 | 35279000 | 28766000 |
| 0        | 2944800  | 2909900  | 600990   | 2468800  | 984840   | 2354600  | 0        | 1706800  |
| 865890   | 939080   | 67069    | 33608    | 92605    | 237110   | 204290   | 169660   | 437960   |
| 7034500  | 12217000 | 2674500  | 8963800  | 9819600  | 5250600  | 2834400  | 8120600  | 8996500  |
| 1423900  | 19339000 | 18337000 | 16780000 | 23172000 | 911920   | 1128200  | 1135700  | 1642200  |
| 419210   | 1406200  | 748630   | 5639800  | 955750   | 214840   | 430000   | 552740   | 456350   |
| 1948900  | 1929500  | 1741400  | 879280   | 1289500  | 8670700  | 8390800  | 7596200  | 6608100  |
| 3462600  | 4445400  | 3489800  | 3876100  | 5970400  | 2786800  | 1432100  | 116750   | 4681100  |
| 105440   | 34258000 | 9122300  | 0        | 0        | 31512000 | 25213000 | 40969000 | 14786000 |
| 10790000 | 2615500  | 12031000 | 409580   | 9383900  | 19149000 | 1070800  | 9065700  | 7795300  |
| 11216000 | 10729000 | 6854500  | 7890300  | 8859200  | 22486000 | 31864000 | 9694800  | 7987600  |
| 343140   | 951700   | 842810   | 444170   | 405350   | 250270   | 232330   | 198010   | 463180   |
| 0        | 6970200  | 1768200  | 1349200  | 785500   | 13768000 | 12798000 | 3233600  | 0        |
| 4480700  | 35552000 | 46108000 | 43277000 | 22996000 | 22419000 | 18940000 | 21083000 | 6627200  |
| 1,39E+08 | 5,7E+08  | 5,05E+08 | 2,63E+08 | 2,72E+08 | 9,2E+08  | 8,35E+08 | 7,71E+08 | 5,14E+08 |
| 11247    | 2089000  | 4025700  | 2553100  | 389920   | 8701000  | 8097200  | 8049000  | 10453000 |
| 8268700  | 40633000 | 37509000 | 16472000 | 19337000 | 50362000 | 39359000 | 30740000 | 21783000 |
| 21210    | 126400   | 78488    | 13311    | 4421,6   | 397330   | 213590   | 275180   | 296080   |
| 2969700  | 211360   | 210550   | 320570   | 293730   | 95702    | 57033    | 50182    | 59157    |
| 171330   | 17590000 | 16631000 | 12359000 | 19762000 | 13544000 | 7727300  | 6778300  | 7545500  |
| 3127200  | 10215000 | 6946400  | 1788900  | 3031000  | 21819000 | 14093000 | 21828000 | 9978000  |



Student's T Student's T Student's T Student's T Majority p Fasta headers

|          |          |          |          |           |                                         |
|----------|----------|----------|----------|-----------|-----------------------------------------|
| 0,000428 | 0,0246   | 0,560557 | 3,11013  | sp O00391 | sp O00391 QSOX1_HUMAN Sulfhydryl oxid   |
| 6,37E-06 | 0        | -4,80394 | -11,2219 | tr B2R717 | tr B2R717 B2R717_HUMAN cDNA, FLJ93231   |
| 0,02611  | 0,0492   | 4,698645 | 2,762629 | tr B4DY05 | tr B4DY05 B4DY05_HUMAN cDNA FLJ58305    |
| 0,00669  | 0,022824 | -1,45239 | -3,16983 | tr B3KNF2 | tr B3KNF2 B3KNF2_HUMAN cDNA FLJ14484    |
| 5,15E-06 | 0,011    | -0,76263 | -5,07655 | tr Q5H9A7 | tr Q5H9A7 Q5H9A7_HUMAN Metalloprotei    |
| 0,005153 | 0,013143 | 1,389258 | 3,277427 | tr Q5TZP0 | tr Q5TZP0 Q5TZP0_HUMAN Matrix metallo   |
| 0,001075 | 0,014154 | -0,77643 | -3,34502 | tr Q53H39 | tr Q53H39 Q53H39_HUMAN Activin beta-A   |
| 0,003054 | 0,02887  | -0,80415 | -2,99913 | tr A0A024 | tr A0A024RDW8 A0A024RDW8_HUMAN Cc       |
| 0,009072 | 0,025895 | 1,824889 | 3,138353 | tr V9HWJ7 | tr V9HWJ7 V9HWJ7_HUMAN Epididymis se    |
| 0,00324  | 0,003667 | -1,49603 | -3,59101 | tr A0A024 | tr A0A024R8V7 A0A024R8V7_HUMAN Met      |
| 0,000966 | 0,0088   | 2,989621 | 4,99568  | sp P19957 | sp P19957 ELAF_HUMAN Elafin OS=Homo s   |
| 0,000671 | 0,0044   | -1,13602 | -4,10434 | tr E9PPJ5 | tr E9PPJ5 E9PPJ5_HUMAN Midkine (Fragme  |
| 0,000248 | 0,0055   | -1,15084 | -4,62101 | tr B4DUV1 | tr B4DUV1 B4DUV1_HUMAN Fibulin-1 OS=H   |
| 0,020636 | 0,043143 | 3,240671 | 2,844386 | tr Q59F03 | tr Q59F03 Q59F03_HUMAN Integrin alpha 3 |
| 0,002483 | 0,004    | 1,714172 | 3,863522 | tr Q5U0A0 | tr Q5U0A0 Q5U0A0_HUMAN Proteasome s     |
| 0,003263 | 0,037333 | 0,785824 | 2,948189 | tr V9HWD9 | tr V9HWD9 V9HWD9_HUMAN Epididymis I     |
| 6,31E-05 | 0        | 3,183593 | 7,523012 | sp P35442 | sp P35442 TSP2_HUMAN Thrombospondin     |
| 0,004635 | 0,025867 | 1,220905 | 3,227093 | tr A0A024 | tr A0A024R2B6 A0A024R2B6_HUMAN Serp     |
| 4,62E-05 | 0        | -1,55537 | -6,23382 | tr D3DSM4 | tr D3DSM4 D3DSM4_HUMAN Collagen, typ    |
| 0,00831  | 0,050897 | 0,969624 | 2,763653 | tr V9HWF2 | tr V9HWF2 V9HWF2_HUMAN Malate dehy      |
| 0,026208 | 0,049125 | -3,87301 | -2,72592 | tr Q8NE89 | tr Q8NE89 Q8NE89_HUMAN Similar to tiss  |
| 0,001696 | 0,021556 | -0,76532 | -3,15908 | sp P52799 | sp P52799 EFNB2_HUMAN Ephrin-B2 OS=H    |
| 0,000317 | 0,004889 | -1,07323 | -4,3736  | sp P78324 | sp P78324-2 SHPS1_HUMAN Isoform 2 of T  |
| 0,000585 | 0,006286 | 1,625356 | 4,690488 | sp P80188 | sp P80188 NGAL_HUMAN Neutrophil gelati  |
| 0,02168  | 0,044741 | -3,86098 | -2,85194 | tr E9PKG6 | tr E9PKG6 E9PKG6_HUMAN Nucleobindin-2   |
| 0,006421 | 0,03792  | 1,028663 | 2,926995 | tr Q59G97 | tr Q59G97 Q59G97_HUMAN EGF-containin    |
| 0,003797 | 0,027818 | -0,88861 | -3,01943 | sp Q13753 | sp Q13753 LAMC2_HUMAN Laminin subuni    |
| 0,006606 | 0,026286 | -1,17995 | -3,02393 | sp Q6UVK1 | sp Q6UVK1 CSPG4_HUMAN Chondroitin sul   |
| 0,003061 | 0,040769 | -0,72736 | -2,8846  | sp Q92743 | sp Q92743 HTRA1_HUMAN Serine protease   |
| 0,009528 | 0,02425  | -2,21346 | -3,20553 | sp Q92823 | sp Q92823-5 NRCAM_HUMAN Isoform 5 of    |
| 0,018537 | 0,049548 | 1,876957 | 2,735875 | tr B7Z5J4 | tr B7Z5J4 B7Z5J4_HUMAN Carboxypeptidas  |
| 0,005931 | 0,049212 | 0,785157 | 2,72015  | tr A8K6T3 | tr A8K6T3 A8K6T3_HUMAN cDNA FLJ78674    |
| 0,000321 | 0,007333 | -1,43398 | -4,86586 | tr Q5M8T4 | tr Q5M8T4 Q5M8T4_HUMAN Connective ti    |

ase 1 OS=Homo sapiens OX=9606 GN=QSOX1 PE=1 SV=3;tr|A0A140VKE5|A0A140VKE5\_HUMAN Sulfatase 5, highly similar to Homo sapiens cathepsin L2 (CTSL2), mRNA OS=Homo sapiens OX=9606 PE=2 SV=1  
3, highly similar to WD repeat protein 1 OS=Homo sapiens OX=9606 PE=2 SV=1;sp|O75083-3|WDR11  
4 fis, clone MAMMA1002485, highly similar to Stanniocalcin-2 OS=Homo sapiens OX=9606 PE=2 SV=1  
inase inhibitor 1 OS=Homo sapiens OX=9606 GN=TIMP1 PE=1 SV=1;tr|Q6FGX5|Q6FGX5\_HUMAN Metalloproteinase 1 (Interstitial collagenase) OS=Homo sapiens OX=9606 PE=2 SV=1;tr|Q53G96|Q53G96\_HUMAN  
chain (Fragment) OS=Homo sapiens OX=9606 PE=2 SV=1;tr|A4D1W7|A4D1W7\_HUMAN Activin beta chain  
collagen, type IV, alpha 2, isoform CRA\_a OS=Homo sapiens OX=9606 GN=COL4A2 PE=4 SV=1;sp|P08534-1|P08534\_HUMAN  
cretory protein Li 37 OS=Homo sapiens OX=9606 GN=HEL-S-37 PE=2 SV=1;tr|Q53FI1|Q53FI1\_HUMAN  
aloproteinase inhibitor 2 OS=Homo sapiens OX=9606 GN=TIMP2 PE=3 SV=1;tr|A0A140VK57|A0A140VK57\_HUMAN

hydroxylase OS=Homo sapiens OX=9606 GN=QSCN6 PE=2 SV=1;sp|O00391-2|QSOX1\_HUMAN Isoform 1 of QSOX1 OS=Homo sapiens OX=9606 GN=QSOX1;tr|A0A024R141|A0A024R141\_HUMAN Cathepsin L2, isoform CRA\_a OS=Homo sapiens OX=9606 GN=CTSL;tr|B3KQF4|B3KQF4\_HUMAN Isoform 2 of WD repeat-containing protein 1 OS=Homo sapiens OX=9606 GN=WDR1;tr|B3KQF4|B3KQF4\_HUMAN STC2 protein (Fragment) OS=Homo sapiens OX=9606 GN=STC2 PE=2 SV=1;tr|B3KQF4|B3KQF4\_HUMAN Matrix metalloproteinase inhibitor 1 OS=Homo sapiens OX=9606 GN=TIMP1 PE=2 SV=1;tr|B3KQF4|B3KQF4\_HUMAN Matrix metalloproteinase 1 preproprotein variant (Fragment) OS=Homo sapiens OX=9606 GN=MT1-1;tr|B3KQF4|B3KQF4\_HUMAN Inhibin beta A chain OS=Homo sapiens OX=9606 GN=INHBA PE=2 SV=1;sp|P08476|INHBA\_HUMAN Inhibin beta A chain OS=Homo sapiens OX=9606 GN=INHBA;tr|P08476|P08476\_HUMAN Collagen alpha-2(IV) chain OS=Homo sapiens OX=9606 GN=COL4A2 PE=1 SV=4;tr|P08476|P08476\_HUMAN L-plastin variant (Fragment) OS=Homo sapiens OX=9606 GN=LPLN1;tr|A0A024RDT4|A0A024RDT4\_HUMAN Metalloproteinase inhibitor 2 OS=Homo sapiens OX=9606 GN=TIMP2;tr|P16035|TIMP2\_HUMAN

Midkine OS=Homo sapiens OX=9606 GN=MDK PE=1 SV=1;tr|E9PLM6|E9PLM6\_HUMAN Midkine OS=Homo sapiens OX=9606 GN=MDK;tr|E9PLM6|E9PLM6\_HUMAN Fibulin-1 OS=Homo sapiens OX=9606 GN=FBLN1;tr|B1AHL2|B1AHL2\_HUMAN Fibulin-1 OS=Homo sapiens OX=9606 GN=FBLN1;tr|B1AHL2|B1AHL2\_HUMAN Integrin alpha-3 OS=Homo sapiens OX=9606 GN=ITGA3;tr|A0A140V072|A0A140V072\_HUMAN Proteasome subunit alpha type OS=Homo sapiens OX=9606 GN=PSA5;tr|P28066|PSA5\_HUMAN Proteasome subunit alpha type OS=Homo sapiens OX=9606 GN=PSA5;tr|P28066|PSA5\_HUMAN Transketolase variant (Fragment) OS=Homo sapiens OX=9606 GN=TKT;tr|P29401|TKT\_HUMAN

Serpine B5 OS=Homo sapiens OX=9606 GN=SERPINB5 PE=3 SV=1;sp|P36952|SPB5\_HUMAN Serpin B5 OS=Homo sapiens OX=9606 GN=SERPINB5;tr|P36952|P36952\_HUMAN Isoform 3 of Collagen alpha-1(XVIII) chain OS=Homo sapiens OX=9606 GN=COL18A1;tr|P36952|P36952\_HUMAN Aldehyde dehydrogenase, cytoplasmic OS=Homo sapiens OX=9606 GN=MDH1 PE=1 SV=4;sp|P40925-3|MDH1\_HUMAN Isoform 2 of Tissue factor pathway inhibitor 2 OS=Homo sapiens OX=9606 GN=TFPI2;sp|P40925-3|TFPI2\_HUMAN

Tyrosine-protein phosphatase non-receptor type substrate 1 OS=Homo sapiens OX=9606 GN=SHPS1;tr|P78324|SHPS1\_HUMAN Neutrophil gelatinase-associated lipocalin OS=Homo sapiens OX=9606 GN=NGAL PE=2 SV=1;tr|P78324|P78324\_HUMAN Nucleobindin-2 OS=Homo sapiens OX=9606 GN=NUCB2;sp|P80303|NUCB2\_HUMAN Nucleobindin-2 OS=Homo sapiens OX=9606 GN=NUCB2;tr|P80303|P80303\_HUMAN Isoform 2 of EGF-containing fibulin-like extracellular matrix protein 1 OS=Homo sapiens OX=9606 GN=FBLN3;tr|Q12805-2|FBLN3\_HUMAN Isoform 2 of EGF-containing fibulin-like extracellular matrix protein 1 OS=Homo sapiens OX=9606 GN=FBLN3;tr|Q12805-2|FBLN3\_HUMAN Short of Laminin subunit gamma-2 OS=Homo sapiens OX=9606 GN=LAMC2;tr|B4DLD1|B4DLD1\_HUMAN

HTRA1 OS=Homo sapiens OX=9606 GN=HTRA1 PE=2 SV=1;tr|B3KRN4|B3KRN4\_HUMAN cDNA FLJ34961 fis, clone NTONG2003839, highly similar to CONNECTIVE TISSUE GROWTH FACTOR OS=Homo sapiens OX=9606 GN=CTGF;tr|Q9ARX0|Q9ARX0\_HUMAN Isoform 3 of Neuronal cell adhesion molecule OS=Homo sapiens OX=9606 GN=NRCAM;sp|Q9ARX0|Q9ARX0\_HUMAN Carboxypeptidase A4 OS=Homo sapiens OX=9606 GN=CPA4;tr|A4D1M3|A4D1M3\_HUMAN Carboxypeptidase A4 OS=Homo sapiens OX=9606 GN=CPA4;tr|A4D1M3|A4D1M3\_HUMAN

CONNECTIVE TISSUE GROWTH FACTOR OS=Homo sapiens OX=9606 GN=CTGF;tr|Q9ARX0|Q9ARX0\_HUMAN

506 GN=MDK PE=1 SV=1;sp|P21741-2|MK\_HUMAN Isoform 2 of  
3LN1 PE=1 SV=1;sp|P23142-2|FBLN1\_HUMAN Isoform A

3teasome subunit alpha type-5 OS=Homo sapiens OX=9606 GN=TKT PE=1 SV=1;tr|Q2L696|HUMAN cDNA FLJ57342, highly similar to Laminin gamma

3\_HUMAN Isoform 3 of Malate dehydrogenase, cytoplasmic

3=Homo sapiens OX=9606 GN=NUCB2 PE=1 SV=3;tr|Q2L696|

3\_HUMAN cDNA FLJ57342, highly similar to Laminin gamma

3eptidase A4 OS=Homo sapiens OX=9606 GN=CPA4 PE=2 SV=1
